# Supplementary material
Source: publisher figshare collection journal article supplement (https://gsajournals.figshare.com/ndownloader/files/31202185)
Supplement: Supplementary file 1 [file 31202185]

## Sheet: ATACvsRNA_NC
SYMBOL	MA1	MA2	MA3A	MA3B	MA3C	MC_WT1	MC_WT2	MC_WT3	MC_Het1	MC_Het2	MC_Het3	baseMean	log2FoldChange	lfcSE	pvalue	padj	seqnames	start	end	peakNames	width	strand	annotation	annotation_trunc	geneChr	geneStart	geneEnd	geneLength	geneStrand	geneId	transcriptId	distanceToTSS	ENSEMBL	GENENAME	MA4	MA5	MA6	MA7	MA8	MA9	MA10	MA11	MC_Het4	MC_Het5	MC_Het6	MC_Homo	annotated1	Melanoma_ATAC_Average	Melanocyte_ATAC_Average
abcc4	76.3324	72.0201	124.245	140.31	83.4762	536.826	250.707	433.782	362.556	478.704	495.531	277.681	-2.10136	0.29808	1.79379e-12	2.29255e-11	chr6	7322180	7322357	chr6:7322180-7322357	178	*	Promoter (<=1kb)	Promoter	6	7322449	7391805	69357	1	368620	NM_001007038	-92	ENSDARG00000058953	ATP-binding cassette, sub-family C (CFTR/MRP), member 4	1.37641	7.58715	5.9304	17.2584	19.1628	16.0928	32.5069	5.10206	3.74638	4.48756	2.46041	1.60862	abcc4_-92	13.1271	3.07574
acbd7	286.607	232.739	245.745	129.412	184.699	3.98633	12.0955	11.0659	13.2057	0	13.4589	103.001	4.56345	0.490469	1.34948e-20	3.49643e-19	chr16	28596456	28596633	chr16:28596456-28596633	178	*	Promoter (<=1kb)	Promoter	16	28596555	28599328	2774	1	619256	NM_001128768	0	ENSDARG00000094730	acyl-CoA binding domain containing 7	34.4103	22.7614	66.4205	21.3192	17.4964	33.6487	12.3836	18.7076	13.7367	5.98341	0.820135	6.4345	acbd7_0	28.3935	6.74369
acbd7	286.607	232.739	245.745	129.412	184.699	3.98633	12.0955	11.0659	13.2057	0	13.4589	103.001	4.56345	0.490469	1.34948e-20	3.49643e-19	chr16	28599321	28599614	chr16:28599321-28599614	294	*	Promoter (2-3kb)	Promoter	16	28596555	28599328	2774	1	619256	NM_001128768	2766	ENSDARG00000094730	acyl-CoA binding domain containing 7	290.423	102.968	276.357	165.478	114.977	156.539	91.3289	124.15	19.9807	13.1635	12.302	8.04312	acbd7_2766	165.278	13.3723
adgrg6	5.76094	6.06485	2.05932	0	1.97188	102.316	50.5812	127.258	114.049	72.1738	176.189	59.8567	-5.09529	0.604358	3.42963e-17	6.76221e-16	chr20	37382931	37383121	chr20:37382931-37383121	191	*	Promoter (<=1kb)	Promoter	20	37383043	37470297	87255	1	561970	NM_001163291	0	ENSDARG00000054137	adhesion G protein-coupled receptor G6	4.12924	11.9227	10.6747	7.10641	4.16582	1.46298	1.54795	3.40138	3.74638	5.68424	8.20135	1.60862	adgrg6_0	5.55139	4.81015
adgrg6	5.76094	6.06485	2.05932	0	1.97188	102.316	50.5812	127.258	114.049	72.1738	176.189	59.8567	-5.09529	0.604358	3.42963e-17	6.76221e-16	chr20	37393150	37393277	chr20:37393150-37393277	128	*	Exon (NM_001163291/561970, exon 2 of 26)	Exon	20	37383043	37470297	87255	1	561970	NM_001163291	10107	ENSDARG00000054137	adhesion G protein-coupled receptor G6	2.75282	1.08388	3.55824	1.0152	3.33266	1.46298	1.54795	13.6055	1.24879	5.68424	0.820135	1.60862	adgrg6_10107	3.5449	2.34045
adgrg6	5.76094	6.06485	2.05932	0	1.97188	102.316	50.5812	127.258	114.049	72.1738	176.189	59.8567	-5.09529	0.604358	3.42963e-17	6.76221e-16	chr20	37398015	37398244	chr20:37398015-37398244	230	*	Intron (NM_001163291/561970, intron 2 of 25)	Intron	20	37383043	37470297	87255	1	561970	NM_001163291	14972	ENSDARG00000054137	adhesion G protein-coupled receptor G6	1.37641	1.08388	1.18608	1.0152	0.833164	1.46298	1.54795	6.80275	18.7319	8.37678	4.92081	8.04312	adgrg6_14972	1.91355	10.0182
adgrg6	5.76094	6.06485	2.05932	0	1.97188	102.316	50.5812	127.258	114.049	72.1738	176.189	59.8567	-5.09529	0.604358	3.42963e-17	6.76221e-16	chr20	37405315	37405751	chr20:37405315-37405751	437	*	Intron (NM_001163291/561970, intron 2 of 25)	Intron	20	37383043	37470297	87255	1	561970	NM_001163291	22272	ENSDARG00000054137	adhesion G protein-coupled receptor G6	15.1405	32.5164	190.959	30.456	125.808	1.46298	6.19179	22.1089	12.4879	8.37678	7.38122	4.82587	adgrg6_22272	53.0804	8.26795
adgrg6	5.76094	6.06485	2.05932	0	1.97188	102.316	50.5812	127.258	114.049	72.1738	176.189	59.8567	-5.09529	0.604358	3.42963e-17	6.76221e-16	chr20	37407978	37408423	chr20:37407978-37408423	446	*	Exon (NM_001163291/561970, exon 3 of 26)	Exon	20	37383043	37470297	87255	1	561970	NM_001163291	24935	ENSDARG00000054137	adhesion G protein-coupled receptor G6	59.1857	31.4325	8.30256	9.13681	9.1648	10.2409	1.54795	8.50344	48.7029	25.4295	51.6685	88.4744	adgrg6_24935	17.1893	53.5688
adgrg6	5.76094	6.06485	2.05932	0	1.97188	102.316	50.5812	127.258	114.049	72.1738	176.189	59.8567	-5.09529	0.604358	3.42963e-17	6.76221e-16	chr20	37413835	37414045	chr20:37413835-37414045	211	*	Exon (NM_001163291/561970, exon 4 of 26)	Exon	20	37383043	37470297	87255	1	561970	NM_001163291	30792	ENSDARG00000054137	adhesion G protein-coupled receptor G6	1.37641	1.08388	8.30256	7.10641	6.66531	1.46298	1.54795	1.70069	13.7367	9.27429	4.10068	1.60862	adgrg6_30792	3.65577	7.18008
adgrg6	5.76094	6.06485	2.05932	0	1.97188	102.316	50.5812	127.258	114.049	72.1738	176.189	59.8567	-5.09529	0.604358	3.42963e-17	6.76221e-16	chr20	37416808	37416929	chr20:37416808-37416929	122	*	Intron (NM_001163291/561970, intron 4 of 25)	Intron	20	37383043	37470297	87255	1	561970	NM_001163291	33765	ENSDARG00000054137	adhesion G protein-coupled receptor G6	1.37641	3.25164	1.18608	1.0152	0.833164	1.46298	4.64384	1.70069	11.2391	3.29088	10.6618	19.3035	adgrg6_33765	1.93375	11.1238
adgrg6	5.76094	6.06485	2.05932	0	1.97188	102.316	50.5812	127.258	114.049	72.1738	176.189	59.8567	-5.09529	0.604358	3.42963e-17	6.76221e-16	chr20	37419633	37420076	chr20:37419633-37420076	444	*	Intron (NM_001163291/561970, intron 4 of 25)	Intron	20	37383043	37470297	87255	1	561970	NM_001163291	36590	ENSDARG00000054137	adhesion G protein-coupled receptor G6	9.63489	21.6776	43.8849	31.4712	20.8291	11.7039	10.8356	11.9048	13.7367	9.57346	18.043	14.4776	adgrg6_36590	20.2428	13.9577
adgrg6	5.76094	6.06485	2.05932	0	1.97188	102.316	50.5812	127.258	114.049	72.1738	176.189	59.8567	-5.09529	0.604358	3.42963e-17	6.76221e-16	chr20	37433130	37433634	chr20:37433130-37433634	505	*	Intron (NM_001369129/561970, intron 5 of 23)	Intron	20	37383043	37470297	87255	1	561970	NM_001163291	50087	ENSDARG00000054137	adhesion G protein-coupled receptor G6	24.7754	13.0065	62.8622	65.9881	134.139	54.1304	43.3425	39.1158	39.9614	18.2494	16.4027	22.5207	adgrg6_50087	54.6701	24.2836
adgrg6	5.76094	6.06485	2.05932	0	1.97188	102.316	50.5812	127.258	114.049	72.1738	176.189	59.8567	-5.09529	0.604358	3.42963e-17	6.76221e-16	chr20	37435063	37435206	chr20:37435063-37435206	144	*	Intron (NM_001369129/561970, intron 5 of 23)	Intron	20	37383043	37470297	87255	1	561970	NM_001163291	52020	ENSDARG00000054137	adhesion G protein-coupled receptor G6	6.88206	8.67103	5.9304	3.0456	4.16582	1.46298	9.28769	5.10206	19.9807	5.68424	16.4027	1.60862	adgrg6_52020	5.56846	10.9191
adgrg6	5.76094	6.06485	2.05932	0	1.97188	102.316	50.5812	127.258	114.049	72.1738	176.189	59.8567	-5.09529	0.604358	3.42963e-17	6.76221e-16	chr20	37435719	37436068	chr20:37435719-37436068	350	*	Intron (NM_001369129/561970, intron 5 of 23)	Intron	20	37383043	37470297	87255	1	561970	NM_001163291	52676	ENSDARG00000054137	adhesion G protein-coupled receptor G6	42.6688	95.3813	158.935	104.566	127.474	49.7415	30.959	37.4151	9.99034	10.471	15.5826	8.04312	adgrg6_52676	80.8925	11.0218
adgrg6	5.76094	6.06485	2.05932	0	1.97188	102.316	50.5812	127.258	114.049	72.1738	176.189	59.8567	-5.09529	0.604358	3.42963e-17	6.76221e-16	chr20	37436562	37436782	chr20:37436562-37436782	221	*	Intron (NM_001369129/561970, intron 5 of 23)	Intron	20	37383043	37470297	87255	1	561970	NM_001163291	53519	ENSDARG00000054137	adhesion G protein-coupled receptor G6	12.3877	26.0131	51.0014	26.3952	20.8291	26.3337	24.7672	42.5172	13.7367	10.471	12.302	16.0862	adgrg6_53519	28.7806	13.149
adgrg6	5.76094	6.06485	2.05932	0	1.97188	102.316	50.5812	127.258	114.049	72.1738	176.189	59.8567	-5.09529	0.604358	3.42963e-17	6.76221e-16	chr20	37439900	37440019	chr20:37439900-37440019	120	*	Exon (NM_001163291/561970, exon 13 of 26)	Exon	20	37383043	37470297	87255	1	561970	NM_001163291	56857	ENSDARG00000054137	adhesion G protein-coupled receptor G6	20.6462	4.33551	9.48864	1.0152	4.16582	2.92597	1.54795	5.10206	29.971	5.98341	14.7624	8.04312	adgrg6_56857	6.15342	14.69
adgrg6	5.76094	6.06485	2.05932	0	1.97188	102.316	50.5812	127.258	114.049	72.1738	176.189	59.8567	-5.09529	0.604358	3.42963e-17	6.76221e-16	chr20	37457004	37457144	chr20:37457004-37457144	141	*	Intron (NM_001163291/561970, intron 21 of 25)	Intron	20	37383043	37470297	87255	1	561970	NM_001163291	73961	ENSDARG00000054137	adhesion G protein-coupled receptor G6	6.88206	9.75491	7.11648	5.076	15.8301	4.38895	7.73974	5.10206	8.74155	6.88093	2.46041	1.60862	adgrg6_73961	7.73629	4.92288
adgrg6	5.76094	6.06485	2.05932	0	1.97188	102.316	50.5812	127.258	114.049	72.1738	176.189	59.8567	-5.09529	0.604358	3.42963e-17	6.76221e-16	chr20	37457452	37457719	chr20:37457452-37457719	268	*	Exon (NM_001163291/561970, exon 22 of 26)	Exon	20	37383043	37470297	87255	1	561970	NM_001163291	74409	ENSDARG00000054137	adhesion G protein-coupled receptor G6	1.37641	7.58715	1.18608	5.076	5.83215	5.85194	4.64384	1.70069	8.74155	11.3685	10.6618	4.82587	adgrg6_74409	4.15678	8.89942
adgrg6	5.76094	6.06485	2.05932	0	1.97188	102.316	50.5812	127.258	114.049	72.1738	176.189	59.8567	-5.09529	0.604358	3.42963e-17	6.76221e-16	chr20	37458912	37459087	chr20:37458912-37459087	176	*	Intron (NM_001163291/561970, intron 22 of 25)	Intron	20	37383043	37470297	87255	1	561970	NM_001163291	75869	ENSDARG00000054137	adhesion G protein-coupled receptor G6	5.50565	18.4259	18.9773	17.2584	22.4954	1.46298	24.7672	10.2041	6.24397	4.48756	5.74095	1.60862	adgrg6_75869	14.8871	4.52027
adgrg6	5.76094	6.06485	2.05932	0	1.97188	102.316	50.5812	127.258	114.049	72.1738	176.189	59.8567	-5.09529	0.604358	3.42963e-17	6.76221e-16	chr20	37461320	37461441	chr20:37461320-37461441	122	*	Intron (NM_001369129/561970, intron 23 of 23)	Intron	20	37383043	37470297	87255	1	561970	NM_001163291	78277	ENSDARG00000054137	adhesion G protein-coupled receptor G6	6.88206	7.58715	8.30256	7.10641	7.49848	13.1669	15.4795	8.50344	16.2343	17.6511	10.6618	33.7811	adgrg6_78277	9.3158	19.5821
adgrg6	5.76094	6.06485	2.05932	0	1.97188	102.316	50.5812	127.258	114.049	72.1738	176.189	59.8567	-5.09529	0.604358	3.42963e-17	6.76221e-16	chr20	37463155	37463518	chr20:37463155-37463518	364	*	3' UTR	3' UTR	20	37383043	37470297	87255	1	561970	NM_001163291	80112	ENSDARG00000054137	adhesion G protein-coupled receptor G6	8.25847	22.7614	9.48864	13.1976	19.9959	8.77791	13.9315	5.10206	16.2343	9.27429	3.28054	12.869	adgrg6_80112	12.6892	10.4145
afap1l1b	23.7639	14.404	108.457	99.4431	299.726	162.111	480.522	302.098	588.253	247.453	3.6706	211.809	-1.44553	0.869148	0.0962816	0.167709	chr21	30423132	30423279	chr21:30423132-30423279	148	*	Exon (NM_001077287/768144, exon 17 of 19)	Exon	21	30418682	30467907	49226	2	768144	NM_001077287	44628	ENSDARG00000056453	actin filament associated protein 1-like 1b	12.3877	14.0904	1.18608	1.0152	5.83215	8.77791	1.54795	1.70069	51.2005	10.7701	26.2443	16.0862	afap1l1b_44628	5.81726	26.0753
afap1l1b	23.7639	14.404	108.457	99.4431	299.726	162.111	480.522	302.098	588.253	247.453	3.6706	211.809	-1.44553	0.869148	0.0962816	0.167709	chr21	30423951	30424316	chr21:30423951-30424316	366	*	Exon (NM_001077287/768144, exon 16 of 19)	Exon	21	30418682	30467907	49226	2	768144	NM_001077287	43591	ENSDARG00000056453	actin filament associated protein 1-like 1b	119.748	36.8519	148.26	62.9424	24.9949	48.2785	66.5618	39.1158	1.24879	11.3685	9.84162	8.04312	afap1l1b_43591	68.3441	7.62551
afap1l1b	23.7639	14.404	108.457	99.4431	299.726	162.111	480.522	302.098	588.253	247.453	3.6706	211.809	-1.44553	0.869148	0.0962816	0.167709	chr21	30426161	30426290	chr21:30426161-30426290	130	*	Intron (NM_001077287/768144, intron 12 of 18)	Intron	21	30418682	30467907	49226	2	768144	NM_001077287	41617	ENSDARG00000056453	actin filament associated protein 1-like 1b	1.37641	5.41939	1.18608	1.0152	4.99898	5.85194	1.54795	10.2041	13.7367	14.6594	9.02149	1.60862	afap1l1b_41617	3.95001	9.75655
afap1l1b	23.7639	14.404	108.457	99.4431	299.726	162.111	480.522	302.098	588.253	247.453	3.6706	211.809	-1.44553	0.869148	0.0962816	0.167709	chr21	30429910	30430193	chr21:30429910-30430193	284	*	Intron (NM_001077287/768144, intron 10 of 18)	Intron	21	30418682	30467907	49226	2	768144	NM_001077287	37714	ENSDARG00000056453	actin filament associated protein 1-like 1b	6.88206	1.08388	3.55824	3.0456	5.83215	7.31492	7.73974	8.50344	18.7319	9.57346	9.02149	12.869	afap1l1b_37714	5.495	12.549
afap1l1b	23.7639	14.404	108.457	99.4431	299.726	162.111	480.522	302.098	588.253	247.453	3.6706	211.809	-1.44553	0.869148	0.0962816	0.167709	chr21	30438514	30438632	chr21:30438514-30438632	119	*	Exon (NM_001077287/768144, exon 6 of 19)	Exon	21	30418682	30467907	49226	2	768144	NM_001077287	29275	ENSDARG00000056453	actin filament associated protein 1-like 1b	31.6575	41.1874	1.18608	1.0152	0.833164	1.46298	1.54795	1.70069	36.215	13.4627	35.2658	82.0399	afap1l1b_29275	10.0739	41.7458
afap1l1b	23.7639	14.404	108.457	99.4431	299.726	162.111	480.522	302.098	588.253	247.453	3.6706	211.809	-1.44553	0.869148	0.0962816	0.167709	chr21	30444823	30445106	chr21:30444823-30445106	284	*	Intron (NM_001077287/768144, intron 1 of 18)	Intron	21	30418682	30467907	49226	2	768144	NM_001077287	22801	ENSDARG00000056453	actin filament associated protein 1-like 1b	50.9273	11.9227	99.6307	17.2584	20.8291	27.7967	30.959	11.9048	8.74155	8.97512	8.20135	11.2604	afap1l1b_22801	33.9036	9.2946
afap1l1b	23.7639	14.404	108.457	99.4431	299.726	162.111	480.522	302.098	588.253	247.453	3.6706	211.809	-1.44553	0.869148	0.0962816	0.167709	chr21	30448155	30448273	chr21:30448155-30448273	119	*	Intron (NM_001077287/768144, intron 1 of 18)	Intron	21	30418682	30467907	49226	2	768144	NM_001077287	19634	ENSDARG00000056453	actin filament associated protein 1-like 1b	15.1405	3.25164	1.18608	1.0152	0.833164	1.46298	1.54795	1.70069	37.4638	5.98341	12.302	22.5207	afap1l1b_19634	3.26728	19.5675
afap1l1b	23.7639	14.404	108.457	99.4431	299.726	162.111	480.522	302.098	588.253	247.453	3.6706	211.809	-1.44553	0.869148	0.0962816	0.167709	chr21	30449353	30449887	chr21:30449353-30449887	535	*	Intron (NM_001077287/768144, intron 1 of 18)	Intron	21	30418682	30467907	49226	2	768144	NM_001077287	18020	ENSDARG00000056453	actin filament associated protein 1-like 1b	46.798	24.9292	126.911	29.4408	8.33164	19.0188	74.3015	5.10206	23.7271	17.6511	9.02149	14.4776	afap1l1b_18020	41.8541	16.2193
afap1l1b	23.7639	14.404	108.457	99.4431	299.726	162.111	480.522	302.098	588.253	247.453	3.6706	211.809	-1.44553	0.869148	0.0962816	0.167709	chr21	30452639	30452788	chr21:30452639-30452788	150	*	Intron (NM_001077287/768144, intron 1 of 18)	Intron	21	30418682	30467907	49226	2	768144	NM_001077287	15119	ENSDARG00000056453	actin filament associated protein 1-like 1b	6.88206	6.50327	11.8608	4.0608	9.99797	7.31492	4.64384	3.40138	4.99517	8.07761	9.02149	9.65175	afap1l1b_15119	6.83313	7.9365
afap1l1b	23.7639	14.404	108.457	99.4431	299.726	162.111	480.522	302.098	588.253	247.453	3.6706	211.809	-1.44553	0.869148	0.0962816	0.167709	chr21	30453011	30453303	chr21:30453011-30453303	293	*	Intron (NM_001077287/768144, intron 1 of 18)	Intron	21	30418682	30467907	49226	2	768144	NM_001077287	14604	ENSDARG00000056453	actin filament associated protein 1-like 1b	19.2698	7.58715	54.5597	14.2128	8.33164	8.77791	24.7672	5.10206	9.99034	11.0693	13.9423	1.60862	afap1l1b_14604	17.826	9.15265
afap1l1b	23.7639	14.404	108.457	99.4431	299.726	162.111	480.522	302.098	588.253	247.453	3.6706	211.809	-1.44553	0.869148	0.0962816	0.167709	chr21	30460000	30460496	chr21:30460000-30460496	497	*	Intron (NM_001077287/768144, intron 1 of 18)	Intron	21	30418682	30467907	49226	2	768144	NM_001077287	7411	ENSDARG00000056453	actin filament associated protein 1-like 1b	121.124	124.646	279.915	51.7752	67.4863	46.8155	156.343	18.7076	16.2343	14.6594	16.4027	14.4776	afap1l1b_7411	108.352	15.4435
afap1l1b	23.7639	14.404	108.457	99.4431	299.726	162.111	480.522	302.098	588.253	247.453	3.6706	211.809	-1.44553	0.869148	0.0962816	0.167709	chr21	30461340	30461458	chr21:30461340-30461458	119	*	Intron (NM_001077287/768144, intron 1 of 18)	Intron	21	30418682	30467907	49226	2	768144	NM_001077287	6449	ENSDARG00000056453	actin filament associated protein 1-like 1b	19.2698	21.6776	1.18608	1.0152	0.833164	1.46298	1.54795	1.70069	27.4734	8.07761	22.9638	57.9105	afap1l1b_6449	6.08668	29.1063
afap1l1b	23.7639	14.404	108.457	99.4431	299.726	162.111	480.522	302.098	588.253	247.453	3.6706	211.809	-1.44553	0.869148	0.0962816	0.167709	chr21	30467829	30468041	chr21:30467829-30468041	213	*	Promoter (<=1kb)	Promoter	21	30418682	30467907	49226	2	768144	NM_001077287	0	ENSDARG00000056453	actin filament associated protein 1-like 1b	66.0678	29.2647	99.6307	23.3496	15.8301	46.8155	82.0412	25.5103	22.4783	7.1801	9.84162	8.04312	afap1l1b_0	48.5638	11.8858
afap1l1b	23.7639	14.404	108.457	99.4431	299.726	162.111	480.522	302.098	588.253	247.453	3.6706	211.809	-1.44553	0.869148	0.0962816	0.167709	chr21	30468602	30468850	chr21:30468602-30468850	249	*	Promoter (<=1kb)	Promoter	21	30418682	30467907	49226	2	768144	NM_001077287	-695	ENSDARG00000056453	actin filament associated protein 1-like 1b	12.3877	20.5937	34.3963	12.1824	6.66531	10.2409	23.2192	5.10206	9.99034	8.07761	7.38122	1.60862	afap1l1b_-695	15.5985	6.76445
alcama	4564.1	17101.4	4641.01	10477.6	2342.59	923.501	2007.86	1014.74	1270.15	2147.54	2321.04	4437.41	2.2774	0.493891	4.00449e-06	2.17569e-05	chr10	28660380	28660501	chr10:28660380-28660501	122	*	Distal Intergenic	Distal Intergenic	10	28733021	28835770	102750	2	30194	NM_131000	175269	ENSDARG00000026531	activated leukocyte cell adhesion molecule a	31.6575	44.439	32.0241	33.5016	45.824	39.5006	32.5069	56.1227	43.7078	43.6789	37.7262	69.1709	alcama_175269	39.4471	48.5709
alcama	4564.1	17101.4	4641.01	10477.6	2342.59	923.501	2007.86	1014.74	1270.15	2147.54	2321.04	4437.41	2.2774	0.493891	4.00449e-06	2.17569e-05	chr10	28718302	28718478	chr10:28718302-28718478	177	*	Distal Intergenic	Distal Intergenic	10	28733021	28835770	102750	2	30194	NM_131000	117292	ENSDARG00000026531	activated leukocyte cell adhesion molecule a	12.3877	1.08388	1.18608	3.0456	14.1638	5.85194	1.54795	5.10206	1.24879	0.897512	1.64027	1.60862	alcama_117292	5.54613	1.3488
alcama	4564.1	17101.4	4641.01	10477.6	2342.59	923.501	2007.86	1014.74	1270.15	2147.54	2321.04	4437.41	2.2774	0.493891	4.00449e-06	2.17569e-05	chr10	28720191	28720437	chr10:28720191-28720437	247	*	Distal Intergenic	Distal Intergenic	10	28733021	28835770	102750	2	30194	NM_131000	115333	ENSDARG00000026531	activated leukocyte cell adhesion molecule a	4.12924	5.41939	1.18608	1.0152	25.8281	17.5558	1.54795	5.10206	1.24879	0.598341	4.10068	1.60862	alcama_115333	7.72298	1.88911
alcama	4564.1	17101.4	4641.01	10477.6	2342.59	923.501	2007.86	1014.74	1270.15	2147.54	2321.04	4437.41	2.2774	0.493891	4.00449e-06	2.17569e-05	chr10	28746571	28746692	chr10:28746571-28746692	122	*	Intron (NM_131000/30194, intron 8 of 15)	Intron	10	28733021	28835770	102750	2	30194	NM_131000	89078	ENSDARG00000026531	activated leukocyte cell adhesion molecule a	1.37641	1.08388	1.18608	3.0456	2.49949	1.46298	1.54795	11.9048	3.74638	4.48756	4.10068	11.2604	alcama_89078	3.0134	5.89875
alcama	4564.1	17101.4	4641.01	10477.6	2342.59	923.501	2007.86	1014.74	1270.15	2147.54	2321.04	4437.41	2.2774	0.493891	4.00449e-06	2.17569e-05	chr10	28782597	28782913	chr10:28782597-28782913	317	*	Intron (NM_131000/30194, intron 1 of 15)	Intron	10	28733021	28835770	102750	2	30194	NM_131000	52857	ENSDARG00000026531	activated leukocyte cell adhesion molecule a	5.50565	1.08388	1.18608	25.38	16.6633	26.3337	21.6713	8.50344	19.9807	6.88093	8.20135	1.60862	alcama_52857	13.2909	9.1679
alcama	4564.1	17101.4	4641.01	10477.6	2342.59	923.501	2007.86	1014.74	1270.15	2147.54	2321.04	4437.41	2.2774	0.493891	4.00449e-06	2.17569e-05	chr10	28783135	28783812	chr10:28783135-28783812	678	*	Intron (NM_131000/30194, intron 1 of 15)	Intron	10	28733021	28835770	102750	2	30194	NM_131000	51958	ENSDARG00000026531	activated leukocyte cell adhesion molecule a	17.8934	9.75491	43.8849	89.3377	63.3205	42.4266	49.5343	49.3199	11.2391	13.4627	18.043	11.2604	alcama_51958	45.684	13.5013
alcama	4564.1	17101.4	4641.01	10477.6	2342.59	923.501	2007.86	1014.74	1270.15	2147.54	2321.04	4437.41	2.2774	0.493891	4.00449e-06	2.17569e-05	chr10	28784831	28785065	chr10:28784831-28785065	235	*	Intron (NM_131000/30194, intron 1 of 15)	Intron	10	28733021	28835770	102750	2	30194	NM_131000	50705	ENSDARG00000026531	activated leukocyte cell adhesion molecule a	4.12924	5.41939	20.1634	41.6232	4.16582	1.46298	17.0274	8.50344	1.24879	1.79502	0.820135	1.60862	alcama_50705	12.8119	1.36814
alcama	4564.1	17101.4	4641.01	10477.6	2342.59	923.501	2007.86	1014.74	1270.15	2147.54	2321.04	4437.41	2.2774	0.493891	4.00449e-06	2.17569e-05	chr10	28789200	28789455	chr10:28789200-28789455	256	*	Intron (NM_131000/30194, intron 1 of 15)	Intron	10	28733021	28835770	102750	2	30194	NM_131000	46315	ENSDARG00000026531	activated leukocyte cell adhesion molecule a	15.1405	13.0065	8.30256	5.076	15.8301	10.2409	10.8356	5.10206	3.74638	6.58176	18.043	8.04312	alcama_46315	10.4418	9.10356
alcama	4564.1	17101.4	4641.01	10477.6	2342.59	923.501	2007.86	1014.74	1270.15	2147.54	2321.04	4437.41	2.2774	0.493891	4.00449e-06	2.17569e-05	chr10	28796580	28797145	chr10:28796580-28797145	566	*	Intron (NM_131000/30194, intron 1 of 15)	Intron	10	28733021	28835770	102750	2	30194	NM_131000	38625	ENSDARG00000026531	activated leukocyte cell adhesion molecule a	9.63489	9.75491	20.1634	27.4104	11.6643	7.31492	54.1782	18.7076	12.4879	19.7453	22.9638	14.4776	alcama_38625	19.8536	17.4186
alcama	4564.1	17101.4	4641.01	10477.6	2342.59	923.501	2007.86	1014.74	1270.15	2147.54	2321.04	4437.41	2.2774	0.493891	4.00449e-06	2.17569e-05	chr10	28800013	28800577	chr10:28800013-28800577	565	*	Intron (NM_131000/30194, intron 1 of 15)	Intron	10	28733021	28835770	102750	2	30194	NM_131000	35193	ENSDARG00000026531	activated leukocyte cell adhesion molecule a	15.1405	28.1808	9.48864	46.6992	32.4934	19.0188	32.5069	54.422	22.4783	14.9585	20.5034	20.9121	alcama_35193	29.7438	19.7131
alcama	4564.1	17101.4	4641.01	10477.6	2342.59	923.501	2007.86	1014.74	1270.15	2147.54	2321.04	4437.41	2.2774	0.493891	4.00449e-06	2.17569e-05	chr10	28803452	28803594	chr10:28803452-28803594	143	*	Intron (NM_131000/30194, intron 1 of 15)	Intron	10	28733021	28835770	102750	2	30194	NM_131000	32176	ENSDARG00000026531	activated leukocyte cell adhesion molecule a	1.37641	1.08388	1.18608	1.0152	6.66531	1.46298	1.54795	5.10206	4.99517	6.28258	4.10068	14.4776	alcama_32176	2.42998	7.46401
alcama	4564.1	17101.4	4641.01	10477.6	2342.59	923.501	2007.86	1014.74	1270.15	2147.54	2321.04	4437.41	2.2774	0.493891	4.00449e-06	2.17569e-05	chr10	28806633	28806844	chr10:28806633-28806844	212	*	Intron (NM_131000/30194, intron 1 of 15)	Intron	10	28733021	28835770	102750	2	30194	NM_131000	28926	ENSDARG00000026531	activated leukocyte cell adhesion molecule a	15.1405	9.75491	14.233	33.5016	29.9939	20.4818	40.2466	20.4083	4.99517	4.18839	10.6618	4.82587	alcama_28926	22.9701	6.1678
alcama	4564.1	17101.4	4641.01	10477.6	2342.59	923.501	2007.86	1014.74	1270.15	2147.54	2321.04	4437.41	2.2774	0.493891	4.00449e-06	2.17569e-05	chr10	28808527	28809397	chr10:28808527-28809397	871	*	Intron (NM_131000/30194, intron 1 of 15)	Intron	10	28733021	28835770	102750	2	30194	NM_131000	26373	ENSDARG00000026531	activated leukocyte cell adhesion molecule a	61.9386	59.6133	122.166	165.478	221.622	117.039	136.219	88.4358	18.7319	23.6345	31.1651	24.1294	alcama_26373	121.564	24.4152
alcama	4564.1	17101.4	4641.01	10477.6	2342.59	923.501	2007.86	1014.74	1270.15	2147.54	2321.04	4437.41	2.2774	0.493891	4.00449e-06	2.17569e-05	chr10	28811874	28812044	chr10:28811874-28812044	171	*	Intron (NM_131000/30194, intron 1 of 15)	Intron	10	28733021	28835770	102750	2	30194	NM_131000	23726	ENSDARG00000026531	activated leukocyte cell adhesion molecule a	1.37641	11.9227	2.37216	9.13681	4.99898	21.9448	1.54795	1.70069	8.74155	9.87263	12.302	11.2604	alcama_23726	6.87505	10.5441
alcama	4564.1	17101.4	4641.01	10477.6	2342.59	923.501	2007.86	1014.74	1270.15	2147.54	2321.04	4437.41	2.2774	0.493891	4.00449e-06	2.17569e-05	chr10	28815065	28815187	chr10:28815065-28815187	123	*	Intron (NM_131000/30194, intron 1 of 15)	Intron	10	28733021	28835770	102750	2	30194	NM_131000	20583	ENSDARG00000026531	activated leukocyte cell adhesion molecule a	1.37641	9.75491	13.0469	13.1976	7.49848	7.31492	1.54795	11.9048	21.2295	12.8643	12.302	30.5639	alcama_20583	8.20525	19.2399
alcama	4564.1	17101.4	4641.01	10477.6	2342.59	923.501	2007.86	1014.74	1270.15	2147.54	2321.04	4437.41	2.2774	0.493891	4.00449e-06	2.17569e-05	chr10	28816247	28816399	chr10:28816247-28816399	153	*	Intron (NM_131000/30194, intron 1 of 15)	Intron	10	28733021	28835770	102750	2	30194	NM_131000	19371	ENSDARG00000026531	activated leukocyte cell adhesion molecule a	1.37641	2.16776	7.11648	24.3648	22.4954	10.2409	1.54795	1.70069	6.24397	2.69254	1.64027	3.21725	alcama_19371	8.8763	3.44851
alcama	4564.1	17101.4	4641.01	10477.6	2342.59	923.501	2007.86	1014.74	1270.15	2147.54	2321.04	4437.41	2.2774	0.493891	4.00449e-06	2.17569e-05	chr10	28820407	28820903	chr10:28820407-28820903	497	*	Intron (NM_131000/30194, intron 1 of 15)	Intron	10	28733021	28835770	102750	2	30194	NM_131000	14867	ENSDARG00000026531	activated leukocyte cell adhesion molecule a	28.9047	70.4521	112.678	163.447	305.771	125.817	47.9864	27.211	17.4831	9.27429	6.56108	1.60862	alcama_14867	110.283	8.73177
alcama	4564.1	17101.4	4641.01	10477.6	2342.59	923.501	2007.86	1014.74	1270.15	2147.54	2321.04	4437.41	2.2774	0.493891	4.00449e-06	2.17569e-05	chr10	28822219	28822535	chr10:28822219-28822535	317	*	Intron (NM_131000/30194, intron 1 of 15)	Intron	10	28733021	28835770	102750	2	30194	NM_131000	13235	ENSDARG00000026531	activated leukocyte cell adhesion molecule a	20.6462	21.6776	42.6989	49.7448	80.8169	45.3525	41.7946	8.50344	12.4879	6.88093	9.02149	4.82587	alcama_13235	38.9044	8.30405
alcama	4564.1	17101.4	4641.01	10477.6	2342.59	923.501	2007.86	1014.74	1270.15	2147.54	2321.04	4437.41	2.2774	0.493891	4.00449e-06	2.17569e-05	chr10	28826761	28827329	chr10:28826761-28827329	569	*	Intron (NM_131000/30194, intron 1 of 15)	Intron	10	28733021	28835770	102750	2	30194	NM_131000	8441	ENSDARG00000026531	activated leukocyte cell adhesion molecule a	9.63489	19.5098	21.3494	62.9424	81.6501	65.8343	47.9864	11.9048	14.9855	11.3685	16.4027	19.3035	alcama_8441	40.1015	15.515
alcama	4564.1	17101.4	4641.01	10477.6	2342.59	923.501	2007.86	1014.74	1270.15	2147.54	2321.04	4437.41	2.2774	0.493891	4.00449e-06	2.17569e-05	chr10	28827356	28827562	chr10:28827356-28827562	207	*	Intron (NM_131000/30194, intron 1 of 15)	Intron	10	28733021	28835770	102750	2	30194	NM_131000	8208	ENSDARG00000026531	activated leukocyte cell adhesion molecule a	1.37641	1.08388	15.419	44.6688	48.3235	21.9448	13.9315	8.50344	2.49759	11.0693	9.84162	22.5207	alcama_8208	19.4064	11.4823
alcama	4564.1	17101.4	4641.01	10477.6	2342.59	923.501	2007.86	1014.74	1270.15	2147.54	2321.04	4437.41	2.2774	0.493891	4.00449e-06	2.17569e-05	chr10	28827807	28828316	chr10:28827807-28828316	510	*	Intron (NM_131000/30194, intron 1 of 15)	Intron	10	28733021	28835770	102750	2	30194	NM_131000	7454	ENSDARG00000026531	activated leukocyte cell adhesion molecule a	5.50565	5.41939	27.2798	190.858	206.625	68.7603	26.3151	22.1089	8.74155	8.37678	10.6618	11.2604	alcama_7454	69.109	9.76011
alcama	4564.1	17101.4	4641.01	10477.6	2342.59	923.501	2007.86	1014.74	1270.15	2147.54	2321.04	4437.41	2.2774	0.493891	4.00449e-06	2.17569e-05	chr10	28834186	28834441	chr10:28834186-28834441	256	*	Promoter (1-2kb)	Promoter	10	28733021	28835770	102750	2	30194	NM_131000	1329	ENSDARG00000026531	activated leukocyte cell adhesion molecule a	1.37641	11.9227	13.0469	26.3952	44.1577	43.8895	13.9315	25.5103	14.9855	7.77844	7.38122	9.65175	alcama_1329	22.5288	9.94923
alcama	4564.1	17101.4	4641.01	10477.6	2342.59	923.501	2007.86	1014.74	1270.15	2147.54	2321.04	4437.41	2.2774	0.493891	4.00449e-06	2.17569e-05	chr10	28835605	28835950	chr10:28835605-28835950	346	*	Promoter (<=1kb)	Promoter	10	28733021	28835770	102750	2	30194	NM_131000	0	ENSDARG00000026531	activated leukocyte cell adhesion molecule a	5.50565	17.3421	84.2116	96.4441	129.14	71.6863	88.233	88.4358	24.9759	32.3104	32.8054	12.869	alcama_0	72.6249	25.7402
alcama	4564.1	17101.4	4641.01	10477.6	2342.59	923.501	2007.86	1014.74	1270.15	2147.54	2321.04	4437.41	2.2774	0.493891	4.00449e-06	2.17569e-05	chr10	28847253	28847750	chr10:28847253-28847750	498	*	Distal Intergenic	Distal Intergenic	10	28733021	28835770	102750	2	30194	NM_131000	-11483	ENSDARG00000026531	activated leukocyte cell adhesion molecule a	45.4216	19.5098	244.332	39.5928	220.788	19.0188	24.7672	18.7076	8.74155	11.3685	6.56108	8.04312	alcama_-11483	79.0173	8.67856
alcama	4564.1	17101.4	4641.01	10477.6	2342.59	923.501	2007.86	1014.74	1270.15	2147.54	2321.04	4437.41	2.2774	0.493891	4.00449e-06	2.17569e-05	chr10	28876703	28876842	chr10:28876703-28876842	140	*	Distal Intergenic	Distal Intergenic	10	28733021	28835770	102750	2	30194	NM_131000	-40933	ENSDARG00000026531	activated leukocyte cell adhesion molecule a	1.37641	1.08388	1.18608	3.0456	2.49949	1.46298	6.19179	11.9048	1.24879	5.98341	4.92081	1.60862	alcama_-40933	3.59388	3.44041
alcama	4564.1	17101.4	4641.01	10477.6	2342.59	923.501	2007.86	1014.74	1270.15	2147.54	2321.04	4437.41	2.2774	0.493891	4.00449e-06	2.17569e-05	chr10	28879862	28880074	chr10:28879862-28880074	213	*	Distal Intergenic	Distal Intergenic	10	28733021	28835770	102750	2	30194	NM_131000	-44092	ENSDARG00000026531	activated leukocyte cell adhesion molecule a	26.1518	37.9357	1.18608	3.0456	4.99898	1.46298	4.64384	10.2041	38.7126	10.7701	33.6255	86.8657	alcama_-44092	11.2037	42.4935
alcama	4564.1	17101.4	4641.01	10477.6	2342.59	923.501	2007.86	1014.74	1270.15	2147.54	2321.04	4437.41	2.2774	0.493891	4.00449e-06	2.17569e-05	chr10	28883382	28883822	chr10:28883382-28883822	441	*	Distal Intergenic	Distal Intergenic	10	28733021	28835770	102750	2	30194	NM_131000	-47612	ENSDARG00000026531	activated leukocyte cell adhesion molecule a	15.1405	11.9227	2.37216	22.3344	13.3306	10.2409	9.28769	51.0206	1.24879	16.1552	13.1222	1.60862	alcama_-47612	16.9562	8.0337
alcama	4564.1	17101.4	4641.01	10477.6	2342.59	923.501	2007.86	1014.74	1270.15	2147.54	2321.04	4437.41	2.2774	0.493891	4.00449e-06	2.17569e-05	chr10	28889168	28889582	chr10:28889168-28889582	415	*	Distal Intergenic	Distal Intergenic	10	28733021	28835770	102750	2	30194	NM_131000	-53398	ENSDARG00000026531	activated leukocyte cell adhesion molecule a	9.63489	11.9227	2.37216	5.076	15.8301	7.31492	13.9315	1.70069	17.4831	15.5569	9.84162	6.4345	alcama_-53398	8.47287	12.329
alcama	4564.1	17101.4	4641.01	10477.6	2342.59	923.501	2007.86	1014.74	1270.15	2147.54	2321.04	4437.41	2.2774	0.493891	4.00449e-06	2.17569e-05	chr10	28895721	28895820	chr10:28895721-28895820	100	*	Distal Intergenic	Distal Intergenic	10	28733021	28835770	102750	2	30194	NM_131000	-59951	ENSDARG00000026531	activated leukocyte cell adhesion molecule a	1.37641	1.08388	1.18608	1.0152	1.66633	1.46298	4.64384	6.80275	8.74155	2.99171	3.28054	14.4776	alcama_-59951	2.40468	7.37286
alcama	4564.1	17101.4	4641.01	10477.6	2342.59	923.501	2007.86	1014.74	1270.15	2147.54	2321.04	4437.41	2.2774	0.493891	4.00449e-06	2.17569e-05	chr10	28896095	28896269	chr10:28896095-28896269	175	*	Distal Intergenic	Distal Intergenic	10	28733021	28835770	102750	2	30194	NM_131000	-60325	ENSDARG00000026531	activated leukocyte cell adhesion molecule a	4.12924	8.67103	17.7912	5.076	14.1638	2.92597	9.28769	8.50344	1.24879	2.69254	3.28054	1.60862	alcama_-60325	8.81854	2.20762
alcama	4564.1	17101.4	4641.01	10477.6	2342.59	923.501	2007.86	1014.74	1270.15	2147.54	2321.04	4437.41	2.2774	0.493891	4.00449e-06	2.17569e-05	chr10	28896357	28896832	chr10:28896357-28896832	476	*	Distal Intergenic	Distal Intergenic	10	28733021	28835770	102750	2	30194	NM_131000	-60587	ENSDARG00000026531	activated leukocyte cell adhesion molecule a	6.88206	19.5098	17.7912	27.4104	18.3296	7.31492	26.3151	28.9117	19.9807	13.7619	22.1436	12.869	alcama_-60587	19.0581	17.1888
alcama	4564.1	17101.4	4641.01	10477.6	2342.59	923.501	2007.86	1014.74	1270.15	2147.54	2321.04	4437.41	2.2774	0.493891	4.00449e-06	2.17569e-05	chr10	28910437	28910576	chr10:28910437-28910576	140	*	Distal Intergenic	Distal Intergenic	10	28733021	28835770	102750	2	30194	NM_131000	-74667	ENSDARG00000026531	activated leukocyte cell adhesion molecule a	4.12924	5.41939	5.9304	5.076	7.49848	10.2409	13.9315	15.3062	18.7319	8.67595	4.92081	8.04312	alcama_-74667	8.44152	10.0929
alcama	4564.1	17101.4	4641.01	10477.6	2342.59	923.501	2007.86	1014.74	1270.15	2147.54	2321.04	4437.41	2.2774	0.493891	4.00449e-06	2.17569e-05	chr10	28924482	28924993	chr10:28924482-28924993	512	*	Distal Intergenic	Distal Intergenic	10	28733021	28835770	102750	2	30194	NM_131000	-88712	ENSDARG00000026531	activated leukocyte cell adhesion molecule a	9.63489	13.0065	8.30256	29.4408	44.1577	58.5194	20.1233	11.9048	16.2343	8.97512	4.92081	24.1294	alcama_-88712	24.3863	13.5649
alcama	4564.1	17101.4	4641.01	10477.6	2342.59	923.501	2007.86	1014.74	1270.15	2147.54	2321.04	4437.41	2.2774	0.493891	4.00449e-06	2.17569e-05	chr10	28934983	28935206	chr10:28934983-28935206	224	*	Distal Intergenic	Distal Intergenic	10	28733021	28835770	102750	2	30194	NM_131000	-99213	ENSDARG00000026531	activated leukocyte cell adhesion molecule a	1.37641	1.08388	1.18608	6.0912	11.6643	7.31492	1.54795	28.9117	4.99517	6.88093	7.38122	9.65175	alcama_-99213	7.39705	7.22727
alcama	4564.1	17101.4	4641.01	10477.6	2342.59	923.501	2007.86	1014.74	1270.15	2147.54	2321.04	4437.41	2.2774	0.493891	4.00449e-06	2.17569e-05	chr10	28938214	28938340	chr10:28938214-28938340	127	*	Distal Intergenic	Distal Intergenic	10	28733021	28835770	102750	2	30194	NM_131000	-102444	ENSDARG00000026531	activated leukocyte cell adhesion molecule a	1.37641	1.08388	5.9304	5.076	4.16582	1.46298	1.54795	15.3062	4.99517	4.48756	4.92081	8.04312	alcama_-102444	4.4937	5.61167
alcama	4564.1	17101.4	4641.01	10477.6	2342.59	923.501	2007.86	1014.74	1270.15	2147.54	2321.04	4437.41	2.2774	0.493891	4.00449e-06	2.17569e-05	chr10	28947575	28947772	chr10:28947575-28947772	198	*	Distal Intergenic	Distal Intergenic	10	28733021	28835770	102750	2	30194	NM_131000	-111805	ENSDARG00000026531	activated leukocyte cell adhesion molecule a	1.37641	4.33551	1.18608	3.0456	7.49848	1.46298	1.54795	11.9048	7.49276	5.38507	4.10068	3.21725	alcama_-111805	4.04473	5.04894
alcama	4564.1	17101.4	4641.01	10477.6	2342.59	923.501	2007.86	1014.74	1270.15	2147.54	2321.04	4437.41	2.2774	0.493891	4.00449e-06	2.17569e-05	chr10	28953558	28953822	chr10:28953558-28953822	265	*	Distal Intergenic	Distal Intergenic	10	28733021	28835770	102750	2	30194	NM_131000	-117788	ENSDARG00000026531	activated leukocyte cell adhesion molecule a	6.88206	2.16776	1.18608	1.0152	1.66633	4.38895	1.54795	8.50344	8.74155	8.67595	13.1222	6.4345	alcama_-117788	3.41972	9.24354
alcama	4564.1	17101.4	4641.01	10477.6	2342.59	923.501	2007.86	1014.74	1270.15	2147.54	2321.04	4437.41	2.2774	0.493891	4.00449e-06	2.17569e-05	chr10	28957516	28957732	chr10:28957516-28957732	217	*	Distal Intergenic	Distal Intergenic	10	28733021	28835770	102750	2	30194	NM_131000	-121746	ENSDARG00000026531	activated leukocyte cell adhesion molecule a	4.12924	8.67103	5.9304	6.0912	5.83215	10.2409	7.73974	1.70069	13.7367	18.8478	17.2228	20.9121	alcama_-121746	6.29192	17.6799
alcama	4564.1	17101.4	4641.01	10477.6	2342.59	923.501	2007.86	1014.74	1270.15	2147.54	2321.04	4437.41	2.2774	0.493891	4.00449e-06	2.17569e-05	chr10	28960541	28960771	chr10:28960541-28960771	231	*	Distal Intergenic	Distal Intergenic	10	28733021	28835770	102750	2	30194	NM_131000	-124771	ENSDARG00000026531	activated leukocyte cell adhesion molecule a	1.37641	5.41939	1.18608	9.13681	7.49848	10.2409	15.4795	32.3131	7.49276	5.0859	4.10068	6.4345	alcama_-124771	10.3313	5.77846
alcama	4564.1	17101.4	4641.01	10477.6	2342.59	923.501	2007.86	1014.74	1270.15	2147.54	2321.04	4437.41	2.2774	0.493891	4.00449e-06	2.17569e-05	chr10	28962540	28962861	chr10:28962540-28962861	322	*	Distal Intergenic	Distal Intergenic	10	28733021	28835770	102750	2	30194	NM_131000	-126770	ENSDARG00000026531	activated leukocyte cell adhesion molecule a	4.12924	1.08388	1.18608	9.13681	5.83215	16.0928	7.73974	6.80275	1.24879	11.0693	10.6618	11.2604	alcama_-126770	6.50043	8.56006
alcama	4564.1	17101.4	4641.01	10477.6	2342.59	923.501	2007.86	1014.74	1270.15	2147.54	2321.04	4437.41	2.2774	0.493891	4.00449e-06	2.17569e-05	chr10	28973257	28973380	chr10:28973257-28973380	124	*	Distal Intergenic	Distal Intergenic	10	28733021	28835770	102750	2	30194	NM_131000	-137487	ENSDARG00000026531	activated leukocyte cell adhesion molecule a	9.63489	9.75491	1.18608	1.0152	5.83215	24.8707	23.2192	18.7076	11.2391	17.0527	15.5826	24.1294	alcama_-137487	11.7776	17.001
alcamb	252.041	68.9877	50.7965	234.985	81.5043	1350.04	2264.06	1413.11	2153.73	2810.36	4015.63	1335.93	-4.08388	0.48459	3.53142e-17	6.95138e-16	chr15	19812435	19812709	chr15:19812435-19812709	275	*	Distal Intergenic	Distal Intergenic	15	19838458	19878992	40535	1	323919	NM_212634	-25749	ENSDARG00000058538	activated leukocyte cell adhesion molecule b	34.4103	29.2647	16.6051	15.228	7.49848	10.2409	1.54795	1.70069	3.74638	6.88093	4.10068	4.82587	alcamb_-25749	14.562	4.88846
alcamb	252.041	68.9877	50.7965	234.985	81.5043	1350.04	2264.06	1413.11	2153.73	2810.36	4015.63	1335.93	-4.08388	0.48459	3.53142e-17	6.95138e-16	chr15	19814113	19814271	chr15:19814113-19814271	159	*	Distal Intergenic	Distal Intergenic	15	19838458	19878992	40535	1	323919	NM_212634	-24187	ENSDARG00000058538	activated leukocyte cell adhesion molecule b	4.12924	4.33551	1.18608	4.0608	2.49949	4.38895	1.54795	10.2041	1.24879	6.58176	7.38122	9.65175	alcamb_-24187	4.04402	6.21588
alcamb	252.041	68.9877	50.7965	234.985	81.5043	1350.04	2264.06	1413.11	2153.73	2810.36	4015.63	1335.93	-4.08388	0.48459	3.53142e-17	6.95138e-16	chr15	19814277	19814472	chr15:19814277-19814472	196	*	Distal Intergenic	Distal Intergenic	15	19838458	19878992	40535	1	323919	NM_212634	-23986	ENSDARG00000058538	activated leukocyte cell adhesion molecule b	2.75282	10.8388	3.55824	13.1976	7.49848	8.77791	1.54795	10.2041	4.99517	7.77844	11.4819	11.2604	alcamb_-23986	7.29699	8.87897
alcamb	252.041	68.9877	50.7965	234.985	81.5043	1350.04	2264.06	1413.11	2153.73	2810.36	4015.63	1335.93	-4.08388	0.48459	3.53142e-17	6.95138e-16	chr15	19818566	19818920	chr15:19818566-19818920	355	*	Distal Intergenic	Distal Intergenic	15	19838458	19878992	40535	1	323919	NM_212634	-19538	ENSDARG00000058538	activated leukocyte cell adhesion molecule b	23.399	16.2582	41.5128	22.3344	25.8281	32.1857	4.64384	23.8096	7.49276	6.58176	12.302	1.60862	alcamb_-19538	23.7465	6.99629
alcamb	252.041	68.9877	50.7965	234.985	81.5043	1350.04	2264.06	1413.11	2153.73	2810.36	4015.63	1335.93	-4.08388	0.48459	3.53142e-17	6.95138e-16	chr15	19838351	19838519	chr15:19838351-19838519	169	*	Promoter (<=1kb)	Promoter	15	19838458	19878992	40535	1	323919	NM_212634	0	ENSDARG00000058538	activated leukocyte cell adhesion molecule b	6.88206	7.58715	10.6747	5.076	7.49848	4.38895	1.54795	6.80275	11.2391	6.88093	18.043	8.04312	alcamb_0	6.30726	11.0515
alcamb	252.041	68.9877	50.7965	234.985	81.5043	1350.04	2264.06	1413.11	2153.73	2810.36	4015.63	1335.93	-4.08388	0.48459	3.53142e-17	6.95138e-16	chr15	19841979	19842336	chr15:19841979-19842336	358	*	Intron (NM_212634/323919, intron 1 of 15)	Intron	15	19838458	19878992	40535	1	323919	NM_212634	3521	ENSDARG00000058538	activated leukocyte cell adhesion molecule b	55.0565	67.2005	119.794	17.2584	9.1648	14.6298	1.54795	27.211	1.24879	8.67595	6.56108	1.60862	alcamb_3521	38.9829	4.52361
alcamb	252.041	68.9877	50.7965	234.985	81.5043	1350.04	2264.06	1413.11	2153.73	2810.36	4015.63	1335.93	-4.08388	0.48459	3.53142e-17	6.95138e-16	chr15	19845176	19845494	chr15:19845176-19845494	319	*	Intron (NM_212634/323919, intron 1 of 15)	Intron	15	19838458	19878992	40535	1	323919	NM_212634	6718	ENSDARG00000058538	activated leukocyte cell adhesion molecule b	1.37641	10.8388	8.30256	9.13681	9.1648	1.46298	1.54795	18.7076	18.7319	15.2577	5.74095	12.869	alcamb_6718	7.56723	13.1499
alcamb	252.041	68.9877	50.7965	234.985	81.5043	1350.04	2264.06	1413.11	2153.73	2810.36	4015.63	1335.93	-4.08388	0.48459	3.53142e-17	6.95138e-16	chr15	19847655	19847774	chr15:19847655-19847774	120	*	Intron (NM_212634/323919, intron 1 of 15)	Intron	15	19838458	19878992	40535	1	323919	NM_212634	9197	ENSDARG00000058538	activated leukocyte cell adhesion molecule b	1.37641	1.08388	3.55824	1.0152	8.33164	1.46298	1.54795	8.50344	4.99517	4.18839	9.02149	27.3466	alcamb_9197	3.35997	11.3879
alcamb	252.041	68.9877	50.7965	234.985	81.5043	1350.04	2264.06	1413.11	2153.73	2810.36	4015.63	1335.93	-4.08388	0.48459	3.53142e-17	6.95138e-16	chr15	19848941	19849378	chr15:19848941-19849378	438	*	Intron (NM_212634/323919, intron 1 of 15)	Intron	15	19838458	19878992	40535	1	323919	NM_212634	10483	ENSDARG00000058538	activated leukocyte cell adhesion molecule b	17.8934	41.1874	29.652	14.2128	5.83215	17.5558	10.8356	42.5172	1.24879	5.98341	5.74095	16.0862	alcamb_10483	22.4608	7.26485
alcamb	252.041	68.9877	50.7965	234.985	81.5043	1350.04	2264.06	1413.11	2153.73	2810.36	4015.63	1335.93	-4.08388	0.48459	3.53142e-17	6.95138e-16	chr15	19855510	19855628	chr15:19855510-19855628	119	*	Intron (NM_212634/323919, intron 1 of 15)	Intron	15	19838458	19878992	40535	1	323919	NM_212634	17052	ENSDARG00000058538	activated leukocyte cell adhesion molecule b	26.1518	5.41939	1.18608	5.076	0.833164	1.46298	3.0959	1.70069	28.7222	5.0859	27.0645	20.9121	alcamb_17052	5.61576	20.4462
alcamb	252.041	68.9877	50.7965	234.985	81.5043	1350.04	2264.06	1413.11	2153.73	2810.36	4015.63	1335.93	-4.08388	0.48459	3.53142e-17	6.95138e-16	chr15	19866683	19867092	chr15:19866683-19867092	410	*	Exon (NM_212634/323919, exon 7 of 16)	Exon	15	19838458	19878992	40535	1	323919	NM_212634	28225	ENSDARG00000058538	activated leukocyte cell adhesion molecule b	15.1405	7.58715	1.18608	5.076	6.66531	1.46298	4.64384	8.50344	6.24397	12.266	7.38122	4.82587	alcamb_28225	6.28317	7.67926
alcamb	252.041	68.9877	50.7965	234.985	81.5043	1350.04	2264.06	1413.11	2153.73	2810.36	4015.63	1335.93	-4.08388	0.48459	3.53142e-17	6.95138e-16	chr15	19869447	19869784	chr15:19869447-19869784	338	*	Intron (NM_212634/323919, intron 11 of 15)	Intron	15	19838458	19878992	40535	1	323919	NM_212634	30989	ENSDARG00000058538	activated leukocyte cell adhesion molecule b	31.6575	87.7942	54.5597	13.1976	34.1597	27.7967	29.411	15.3062	17.4831	17.6511	28.7047	11.2604	alcamb_30989	36.7353	18.7748
alcamb	252.041	68.9877	50.7965	234.985	81.5043	1350.04	2264.06	1413.11	2153.73	2810.36	4015.63	1335.93	-4.08388	0.48459	3.53142e-17	6.95138e-16	chr15	19874599	19874720	chr15:19874599-19874720	122	*	Intron (NM_212634/323919, intron 13 of 15)	Intron	15	19838458	19878992	40535	1	323919	NM_212634	36141	ENSDARG00000058538	activated leukocyte cell adhesion molecule b	1.37641	9.75491	4.74432	1.0152	7.49848	7.31492	6.19179	1.70069	6.24397	5.38507	6.56108	25.738	alcamb_36141	4.94959	10.982
aldh16a1	81.3732	229.706	267.025	217.958	437.757	58.4662	349.67	139.43	91.2393	250.399	490.637	237.605	0.101648	0.570245	0.858524	0.901993	chr3	32080249	32080423	chr3:32080249-32080423	175	*	Promoter (<=1kb)	Promoter	3	32080403	32098535	18133	1	492710	NM_001079954	0	ENSDARG00000037935	aldehyde dehydrogenase 16 family, member A1	19.2698	4.33551	9.48864	3.0456	9.1648	10.2409	17.0274	11.9048	6.24397	5.38507	6.56108	9.65175	aldh16a1_0	10.5597	6.96047
aldh16a1	81.3732	229.706	267.025	217.958	437.757	58.4662	349.67	139.43	91.2393	250.399	490.637	237.605	0.101648	0.570245	0.858524	0.901993	chr3	32081156	32081276	chr3:32081156-32081276	121	*	Promoter (<=1kb)	Promoter	3	32080403	32098535	18133	1	492710	NM_001079954	753	ENSDARG00000037935	aldehyde dehydrogenase 16 family, member A1	15.1405	27.097	21.3494	15.228	59.9878	21.9448	34.0549	27.211	43.7078	28.4212	41.8269	65.9536	aldh16a1_753	27.7517	44.9774
aldh16a1	81.3732	229.706	267.025	217.958	437.757	58.4662	349.67	139.43	91.2393	250.399	490.637	237.605	0.101648	0.570245	0.858524	0.901993	chr3	32087026	32087178	chr3:32087026-32087178	153	*	Intron (NM_001079954/492710, intron 6 of 15)	Intron	3	32080403	32098535	18133	1	492710	NM_001079954	6623	ENSDARG00000037935	aldehyde dehydrogenase 16 family, member A1	9.63489	5.41939	7.11648	3.0456	4.16582	8.77791	15.4795	8.50344	2.49759	8.37678	9.02149	8.04312	aldh16a1_6623	7.76788	6.98474
aldh16a1	81.3732	229.706	267.025	217.958	437.757	58.4662	349.67	139.43	91.2393	250.399	490.637	237.605	0.101648	0.570245	0.858524	0.901993	chr3	32087190	32087598	chr3:32087190-32087598	409	*	Exon (NM_001079954/492710, exon 7 of 16)	Exon	3	32080403	32098535	18133	1	492710	NM_001079954	6787	ENSDARG00000037935	aldehyde dehydrogenase 16 family, member A1	30.2811	35.768	37.9545	13.1976	20.8291	16.0928	32.5069	22.1089	9.99034	22.4378	21.3235	22.5207	aldh16a1_6787	26.0924	19.0681
aldh16a1	81.3732	229.706	267.025	217.958	437.757	58.4662	349.67	139.43	91.2393	250.399	490.637	237.605	0.101648	0.570245	0.858524	0.901993	chr3	32093513	32093631	chr3:32093513-32093631	119	*	Intron (NM_001079954/492710, intron 11 of 15)	Intron	3	32080403	32098535	18133	1	492710	NM_001079954	13110	ENSDARG00000037935	aldehyde dehydrogenase 16 family, member A1	31.6575	29.2647	1.18608	1.0152	0.833164	1.46298	1.54795	1.70069	21.2295	8.67595	40.1866	96.5175	aldh16a1_13110	8.58353	41.6524
aldh2.2	666.828	1058.32	939.735	875.917	758.516	938.117	1312.91	699.363	989.226	1140.05	1345.89	974.988	-0.316685	0.237104	0.181668	0.278809	chr5	69603922	69604195	chr5:69603922-69604195	274	*	Intron (NM_213301/368239, intron 8 of 12)	Intron	5	69597164	69620753	23590	2	368239	NM_213301	16558	ENSDARG00000028087	aldehyde dehydrogenase 2 family member, tandem duplicate 2	9.63489	1.08388	32.0241	7.10641	25.8281	1.46298	1.54795	1.70069	1.24879	1.19668	2.46041	1.60862	aldh2.2_16558	10.0486	1.62863
aldh2.2	666.828	1058.32	939.735	875.917	758.516	938.117	1312.91	699.363	989.226	1140.05	1345.89	974.988	-0.316685	0.237104	0.181668	0.278809	chr5	69604434	69604553	chr5:69604434-69604553	120	*	Intron (NM_213301/368239, intron 8 of 12)	Intron	5	69597164	69620753	23590	2	368239	NM_213301	16200	ENSDARG00000028087	aldehyde dehydrogenase 2 family member, tandem duplicate 2	6.88206	1.08388	3.55824	5.076	2.49949	4.38895	7.73974	1.70069	3.74638	6.28258	11.4819	4.82587	aldh2.2_16200	4.11613	6.58418
aldh2.2	666.828	1058.32	939.735	875.917	758.516	938.117	1312.91	699.363	989.226	1140.05	1345.89	974.988	-0.316685	0.237104	0.181668	0.278809	chr5	69612579	69612799	chr5:69612579-69612799	221	*	Exon (NM_213301/368239, exon 3 of 13)	Exon	5	69597164	69620753	23590	2	368239	NM_213301	7954	ENSDARG00000028087	aldehyde dehydrogenase 2 family member, tandem duplicate 2	1.37641	1.08388	1.18608	1.0152	9.1648	4.38895	1.54795	1.70069	16.2343	7.47927	2.46041	8.04312	aldh2.2_7954	2.683	8.55428
aldh2.2	666.828	1058.32	939.735	875.917	758.516	938.117	1312.91	699.363	989.226	1140.05	1345.89	974.988	-0.316685	0.237104	0.181668	0.278809	chr5	69620241	69620475	chr5:69620241-69620475	235	*	Promoter (<=1kb)	Promoter	5	69597164	69620753	23590	2	368239	NM_213301	278	ENSDARG00000028087	aldehyde dehydrogenase 2 family member, tandem duplicate 2	17.8934	1.08388	17.7912	18.2736	14.1638	19.0188	17.0274	13.6055	8.74155	5.38507	4.10068	16.0862	aldh2.2_278	14.8572	8.57839
aldh2.2	666.828	1058.32	939.735	875.917	758.516	938.117	1312.91	699.363	989.226	1140.05	1345.89	974.988	-0.316685	0.237104	0.181668	0.278809	chr5	69620487	69620834	chr5:69620487-69620834	348	*	Promoter (<=1kb)	Promoter	5	69597164	69620753	23590	2	368239	NM_213301	0	ENSDARG00000028087	aldehyde dehydrogenase 2 family member, tandem duplicate 2	55.0565	26.0131	59.304	37.5624	36.6592	46.8155	20.1233	20.4083	11.2391	11.6677	18.8631	48.2587	aldh2.2_0	37.7428	22.5072
alx1	4.3207	0	0	0	6.57293	0	1.09959	5.53294	1.20052	0	0	1.70243	0.722972	2.29714	0.752969	0.823883	chr18_KZ115553v1_alt	186862	187061	chr18_KZ115553v1_alt:186862-187061	200	*	Distal Intergenic	Distal Intergenic	735	156730	164673	7944	1	565176	NM_001045074	30132	ENSDARG00000062824	ALX homeobox 1	11.0113	9.75491	43.8849	1.0152	2.49949	2.92597	1.54795	8.50344	1.24879	5.68424	1.64027	3.21725	alx1_30132	10.1429	2.94764
alx4b	0	21.227	3.43219	1.36223	37.4657	39.8633	67.0751	13.279	328.942	106.051	47.7178	60.5832	-2.98372	1.02028	0.00345105	0.00985855	chr18	38308239	38308573	chr18:38308239-38308573	335	*	Distal Intergenic	Distal Intergenic	18	38321039	38364462	43424	1	497424	NM_001310078	-12466	ENSDARG00000074442	ALX homeobox 4b	26.1518	8.67103	72.3509	21.3192	27.4944	16.0928	26.3151	11.9048	11.2391	8.37678	0.820135	8.04312	alx4b_-12466	26.2875	7.11979
alx4b	0	21.227	3.43219	1.36223	37.4657	39.8633	67.0751	13.279	328.942	106.051	47.7178	60.5832	-2.98372	1.02028	0.00345105	0.00985855	chr18	38312073	38312324	chr18:38312073-38312324	252	*	Distal Intergenic	Distal Intergenic	18	38321039	38364462	43424	1	497424	NM_001310078	-8715	ENSDARG00000074442	ALX homeobox 4b	31.6575	1.08388	49.8153	15.228	7.49848	7.31492	13.9315	5.10206	7.49276	5.0859	0.820135	1.60862	alx4b_-8715	16.454	3.75185
alx4b	0	21.227	3.43219	1.36223	37.4657	39.8633	67.0751	13.279	328.942	106.051	47.7178	60.5832	-2.98372	1.02028	0.00345105	0.00985855	chr18	38314111	38314516	chr18:38314111-38314516	406	*	Distal Intergenic	Distal Intergenic	18	38321039	38364462	43424	1	497424	NM_001310078	-6523	ENSDARG00000074442	ALX homeobox 4b	59.1857	29.2647	35.5824	53.8056	40.825	51.2045	10.8356	18.7076	3.74638	9.87263	7.38122	20.9121	alx4b_-6523	37.4264	10.4781
alx4b	0	21.227	3.43219	1.36223	37.4657	39.8633	67.0751	13.279	328.942	106.051	47.7178	60.5832	-2.98372	1.02028	0.00345105	0.00985855	chr18	38317777	38317979	chr18:38317777-38317979	203	*	Distal Intergenic	Distal Intergenic	18	38321039	38364462	43424	1	497424	NM_001310078	-3060	ENSDARG00000074442	ALX homeobox 4b	17.8934	5.41939	41.5128	3.0456	3.33266	1.46298	7.73974	17.0069	1.24879	1.19668	1.64027	1.60862	alx4b_-3060	12.1767	1.42359
alx4b	0	21.227	3.43219	1.36223	37.4657	39.8633	67.0751	13.279	328.942	106.051	47.7178	60.5832	-2.98372	1.02028	0.00345105	0.00985855	chr18	38321042	38321781	chr18:38321042-38321781	740	*	Promoter (<=1kb)	Promoter	18	38321039	38364462	43424	1	497424	NM_001310078	3	ENSDARG00000074442	ALX homeobox 4b	12.3877	27.097	18.9773	3.0456	22.4954	24.8707	23.2192	23.8096	44.9566	29.3187	22.9638	14.4776	alx4b_3	19.4878	27.9292
alx4b	0	21.227	3.43219	1.36223	37.4657	39.8633	67.0751	13.279	328.942	106.051	47.7178	60.5832	-2.98372	1.02028	0.00345105	0.00985855	chr18	38323789	38323974	chr18:38323789-38323974	186	*	Promoter (2-3kb)	Promoter	18	38321039	38364462	43424	1	497424	NM_001310078	2750	ENSDARG00000074442	ALX homeobox 4b	4.12924	6.50327	13.0469	5.076	11.6643	10.2409	10.8356	1.70069	2.49759	2.39337	4.92081	1.60862	alx4b_2750	7.89961	2.8551
alx4b	0	21.227	3.43219	1.36223	37.4657	39.8633	67.0751	13.279	328.942	106.051	47.7178	60.5832	-2.98372	1.02028	0.00345105	0.00985855	chr18	38334154	38334273	chr18:38334154-38334273	120	*	Intron (NM_001310078/497424, intron 1 of 2)	Intron	18	38321039	38364462	43424	1	497424	NM_001310078	13115	ENSDARG00000074442	ALX homeobox 4b	4.12924	14.0904	1.18608	3.0456	2.49949	10.2409	7.73974	1.70069	8.74155	5.68424	5.74095	4.82587	alx4b_13115	5.57902	6.24815
alx4b	0	21.227	3.43219	1.36223	37.4657	39.8633	67.0751	13.279	328.942	106.051	47.7178	60.5832	-2.98372	1.02028	0.00345105	0.00985855	chr18	38335719	38335847	chr18:38335719-38335847	129	*	Intron (NM_001310078/497424, intron 1 of 2)	Intron	18	38321039	38364462	43424	1	497424	NM_001310078	14680	ENSDARG00000074442	ALX homeobox 4b	4.12924	2.16776	14.233	1.0152	0.833164	8.77791	9.28769	5.10206	7.49276	5.38507	4.92081	1.60862	alx4b_14680	5.69325	4.85182
alx4b	0	21.227	3.43219	1.36223	37.4657	39.8633	67.0751	13.279	328.942	106.051	47.7178	60.5832	-2.98372	1.02028	0.00345105	0.00985855	chr18	38341994	38342194	chr18:38341994-38342194	201	*	Intron (NM_001310078/497424, intron 1 of 2)	Intron	18	38321039	38364462	43424	1	497424	NM_001310078	20955	ENSDARG00000074442	ALX homeobox 4b	8.25847	10.8388	10.6747	1.0152	2.49949	11.7039	4.64384	3.40138	6.24397	7.1801	9.02149	4.82587	alx4b_20955	6.62947	6.81786
alx4b	0	21.227	3.43219	1.36223	37.4657	39.8633	67.0751	13.279	328.942	106.051	47.7178	60.5832	-2.98372	1.02028	0.00345105	0.00985855	chr18	38382844	38383086	chr18:38382844-38383086	243	*	Distal Intergenic	Distal Intergenic	18	38321039	38364462	43424	1	497424	NM_001310078	61805	ENSDARG00000074442	ALX homeobox 4b	20.6462	22.7614	58.1179	19.2888	24.1618	19.0188	18.5754	44.2179	1.24879	5.0859	8.20135	8.04312	alx4b_61805	28.3485	5.64479
alx4b	0	21.227	3.43219	1.36223	37.4657	39.8633	67.0751	13.279	328.942	106.051	47.7178	60.5832	-2.98372	1.02028	0.00345105	0.00985855	chr18	38390456	38390584	chr18:38390456-38390584	129	*	Distal Intergenic	Distal Intergenic	18	38321039	38364462	43424	1	497424	NM_001310078	69417	ENSDARG00000074442	ALX homeobox 4b	15.1405	7.58715	13.0469	7.10641	12.4975	7.31492	10.8356	18.7076	13.7367	12.8643	18.8631	17.6949	alx4b_69417	11.5296	15.7898
alx4b	0	21.227	3.43219	1.36223	37.4657	39.8633	67.0751	13.279	328.942	106.051	47.7178	60.5832	-2.98372	1.02028	0.00345105	0.00985855	chr18	38403345	38403555	chr18:38403345-38403555	211	*	Distal Intergenic	Distal Intergenic	18	38321039	38364462	43424	1	497424	NM_001310078	82306	ENSDARG00000074442	ALX homeobox 4b	12.3877	1.08388	1.18608	11.1672	5.83215	2.92597	1.54795	8.50344	1.24879	2.09419	0.820135	4.82587	alx4b_82306	5.5793	2.24725
alx4b	0	21.227	3.43219	1.36223	37.4657	39.8633	67.0751	13.279	328.942	106.051	47.7178	60.5832	-2.98372	1.02028	0.00345105	0.00985855	chr18	38441979	38442105	chr18:38441979-38442105	127	*	Distal Intergenic	Distal Intergenic	18	38321039	38364462	43424	1	497424	NM_001310078	120940	ENSDARG00000074442	ALX homeobox 4b	24.7754	24.9292	22.5355	16.2432	18.3296	19.0188	23.2192	32.3131	34.9662	20.6428	30.345	17.6949	alx4b_120940	22.6705	25.9122
alx4b	0	21.227	3.43219	1.36223	37.4657	39.8633	67.0751	13.279	328.942	106.051	47.7178	60.5832	-2.98372	1.02028	0.00345105	0.00985855	chr18	38448933	38449133	chr18:38448933-38449133	201	*	Distal Intergenic	Distal Intergenic	18	38321039	38364462	43424	1	497424	NM_001310078	127894	ENSDARG00000074442	ALX homeobox 4b	6.88206	16.2582	10.6747	1.0152	5.83215	14.6298	4.64384	13.6055	14.9855	10.471	7.38122	8.04312	alx4b_127894	9.19269	10.2202
alx4b	0	21.227	3.43219	1.36223	37.4657	39.8633	67.0751	13.279	328.942	106.051	47.7178	60.5832	-2.98372	1.02028	0.00345105	0.00985855	chr18	38464224	38464343	chr18:38464224-38464343	120	*	Distal Intergenic	Distal Intergenic	18	38321039	38364462	43424	1	497424	NM_001310078	143185	ENSDARG00000074442	ALX homeobox 4b	1.37641	3.25164	13.0469	7.10641	7.49848	7.31492	1.54795	5.10206	1.24879	0.299171	0.820135	1.60862	alx4b_143185	5.78059	0.994181
amdhd2	550.169	478.365	453.05	679.074	894.576	487.661	514.609	377.346	369.759	279.858	526.119	510.053	0.520505	0.274807	0.0582146	0.111148	chr3	13535630	13535844	chr3:13535630-13535844	215	*	Exon (NM_205681/402981, exon 6 of 12)	Exon	3	13525523	13546359	20837	2	402981	NM_205681	10515	ENSDARG00000100376	amidohydrolase domain containing 2	9.63489	14.0904	3.55824	3.0456	8.33164	1.46298	1.54795	1.70069	1.24879	6.88093	4.10068	1.60862	amdhd2_10515	5.42155	3.45975
amdhd2	550.169	478.365	453.05	679.074	894.576	487.661	514.609	377.346	369.759	279.858	526.119	510.053	0.520505	0.274807	0.0582146	0.111148	chr3	13539068	13539205	chr3:13539068-13539205	138	*	Exon (NM_205681/402981, exon 4 of 12)	Exon	3	13525523	13546359	20837	2	402981	NM_205681	7154	ENSDARG00000100376	amidohydrolase domain containing 2	1.37641	9.75491	5.9304	1.0152	0.833164	7.31492	4.64384	1.70069	7.49276	6.28258	2.46041	11.2604	amdhd2_7154	4.07119	6.87403
amdhd2	550.169	478.365	453.05	679.074	894.576	487.661	514.609	377.346	369.759	279.858	526.119	510.053	0.520505	0.274807	0.0582146	0.111148	chr3	13542236	13542503	chr3:13542236-13542503	268	*	5' UTR	5' UTR	3	13525523	13546359	20837	2	402981	NM_205681	3856	ENSDARG00000100376	amidohydrolase domain containing 2	11.0113	3.25164	5.9304	2.0304	14.997	1.46298	3.0959	18.7076	8.74155	5.68424	5.74095	4.82587	amdhd2_3856	7.56089	6.24815
amdhd2	550.169	478.365	453.05	679.074	894.576	487.661	514.609	377.346	369.759	279.858	526.119	510.053	0.520505	0.274807	0.0582146	0.111148	chr3	13546204	13546552	chr3:13546204-13546552	349	*	Promoter (<=1kb)	Promoter	3	13525523	13546359	20837	2	402981	NM_205681	0	ENSDARG00000100376	amidohydrolase domain containing 2	45.4216	62.865	59.304	52.7904	66.6531	67.2973	47.9864	40.8165	28.7222	19.1469	17.2228	14.4776	amdhd2_0	55.3918	19.8924
aox5	1.44023	7.58106	11.6695	2.04335	11.174	609.909	1309.61	906.295	1051.65	732.049	772.049	492.316	-7.04303	0.464185	5.34657e-52	6.97963e-50	chr22	14088001	14088175	chr22:14088001-14088175	175	*	Exon (NM_001278796/64265, exon 32 of 35)	Exon	22	14084036	14115316	31281	2	64265	NM_001278796	27141	ENSDARG00000071475	aldehyde oxidase 5	8.25847	11.9227	4.74432	5.076	7.49848	13.1669	17.0274	18.7076	19.9807	12.266	18.043	16.0862	aox5_27141	10.8002	16.594
aox5	1.44023	7.58106	11.6695	2.04335	11.174	609.909	1309.61	906.295	1051.65	732.049	772.049	492.316	-7.04303	0.464185	5.34657e-52	6.97963e-50	chr22	14101513	14101631	chr22:14101513-14101631	119	*	Intron (NM_001278796/64265, intron 17 of 34)	Intron	22	14084036	14115316	31281	2	64265	NM_001278796	13685	ENSDARG00000071475	aldehyde oxidase 5	34.4103	29.2647	3.55824	1.0152	2.49949	7.31492	1.54795	1.70069	28.7222	12.266	27.0645	56.3019	aox5_13685	10.1639	31.0886
aox5	1.44023	7.58106	11.6695	2.04335	11.174	609.909	1309.61	906.295	1051.65	732.049	772.049	492.316	-7.04303	0.464185	5.34657e-52	6.97963e-50	chr22	14111756	14111984	chr22:14111756-14111984	229	*	Intron (NM_001278796/64265, intron 3 of 34)	Intron	22	14084036	14115316	31281	2	64265	NM_001278796	3332	ENSDARG00000071475	aldehyde oxidase 5	23.399	1.08388	4.74432	3.0456	5.83215	2.92597	6.19179	11.9048	2.49759	7.47927	6.56108	6.4345	aox5_3332	7.39094	5.74311
aox5	1.44023	7.58106	11.6695	2.04335	11.174	609.909	1309.61	906.295	1051.65	732.049	772.049	492.316	-7.04303	0.464185	5.34657e-52	6.97963e-50	chr22	14113843	14113992	chr22:14113843-14113992	150	*	Promoter (1-2kb)	Promoter	22	14084036	14115316	31281	2	64265	NM_001278796	1324	ENSDARG00000071475	aldehyde oxidase 5	6.88206	7.58715	17.7912	18.2736	2.49949	1.46298	1.54795	6.80275	3.74638	1.79502	2.46041	1.60862	aox5_1324	7.8559	2.40261
aqp7	86.4141	113.716	89.9235	86.5019	214.935	7.97267	18.6931	24.3449	106.846	0	17.1295	69.6797	2.01727	0.812743	0.0130631	0.0313628	chr21	12007400	12007630	chr21:12007400-12007630	231	*	Promoter (2-3kb)	Promoter	21	12010579	12020299	9721	1	334529	NM_199910	-2949	ENSDARG00000026787	aquaporin 7	4.12924	8.67103	2.37216	1.0152	0.833164	1.46298	7.73974	1.70069	8.74155	7.47927	4.92081	19.3035	aqp7_-2949	3.49053	10.1113
aqp7	86.4141	113.716	89.9235	86.5019	214.935	7.97267	18.6931	24.3449	106.846	0	17.1295	69.6797	2.01727	0.812743	0.0130631	0.0313628	chr21	12010294	12010756	chr21:12010294-12010756	463	*	Promoter (<=1kb)	Promoter	21	12010579	12020299	9721	1	334529	NM_199910	0	ENSDARG00000026787	aquaporin 7	89.4668	46.6068	252.635	78.1705	42.4914	21.9448	47.9864	17.0069	17.4831	15.5569	22.1436	16.0862	aqp7_0	74.5385	17.8175
aqp7	86.4141	113.716	89.9235	86.5019	214.935	7.97267	18.6931	24.3449	106.846	0	17.1295	69.6797	2.01727	0.812743	0.0130631	0.0313628	chr21	12019034	12019199	chr21:12019034-12019199	166	*	Exon (NM_199910/334529, exon 5 of 6)	Exon	21	12010579	12020299	9721	1	334529	NM_199910	8455	ENSDARG00000026787	aquaporin 7	4.12924	1.08388	5.9304	12.1824	0.833164	1.46298	15.4795	6.80275	6.24397	7.1801	12.302	1.60862	aqp7_8455	5.98804	6.83368
aspm	1479.12	595.113	1102.42	954.245	359.539	116.932	134.15	116.192	51.6222	32.4046	99.1062	458.259	3.28932	0.454168	4.40462e-13	6.04212e-12	chr22	23572727	23572966	chr22:23572727-23572966	240	*	Exon (NM_001123373/554173, exon 22 of 29)	Exon	22	23546926	23582605	35680	1	554173	NM_001123373	25801	ENSDARG00000103754	abnormal spindle microtubule assembly	27.5282	14.0904	1.18608	3.0456	9.1648	4.38895	1.54795	1.70069	1.24879	0.299171	3.28054	4.82587	aspm_25801	7.83159	2.41359
atic	488.96	1385.06	789.405	1381.31	740.769	720.198	1058.91	802.276	563.042	1150.36	1028.99	919.025	0.109303	0.337327	0.745917	0.817824	chr1	5478154	5478370	chr1:5478154-5478370	217	*	Distal Intergenic	Distal Intergenic	1	5485853	5503665	17813	1	140622	NM_001082796	-7483	ENSDARG00000016706	5-aminoimidazole-4-carboxamide ribonucleotide formyltransferase/IMP cyclohydrolase	1.37641	3.25164	2.37216	1.0152	2.49949	1.46298	4.64384	3.40138	4.99517	7.47927	13.1222	8.04312	atic_-7483	2.50289	8.40993
atic	488.96	1385.06	789.405	1381.31	740.769	720.198	1058.91	802.276	563.042	1150.36	1028.99	919.025	0.109303	0.337327	0.745917	0.817824	chr1	5484688	5484889	chr1:5484688-5484889	202	*	Promoter (<=1kb)	Promoter	1	5485853	5503665	17813	1	140622	NM_001082796	-964	ENSDARG00000016706	5-aminoimidazole-4-carboxamide ribonucleotide formyltransferase/IMP cyclohydrolase	1.37641	3.25164	7.11648	1.0152	12.4975	5.85194	7.73974	1.70069	7.49276	8.67595	6.56108	24.1294	atic_-964	5.06869	11.7148
atic	488.96	1385.06	789.405	1381.31	740.769	720.198	1058.91	802.276	563.042	1150.36	1028.99	919.025	0.109303	0.337327	0.745917	0.817824	chr1	5485701	5485878	chr1:5485701-5485878	178	*	Promoter (<=1kb)	Promoter	1	5485853	5503665	17813	1	140622	NM_001082796	0	ENSDARG00000016706	5-aminoimidazole-4-carboxamide ribonucleotide formyltransferase/IMP cyclohydrolase	9.63489	14.0904	3.55824	17.2584	16.6633	29.2597	47.9864	8.50344	23.7271	14.061	21.3235	22.5207	atic_0	18.3693	20.4081
atic	488.96	1385.06	789.405	1381.31	740.769	720.198	1058.91	802.276	563.042	1150.36	1028.99	919.025	0.109303	0.337327	0.745917	0.817824	chr1	5487058	5487176	chr1:5487058-5487176	119	*	Promoter (1-2kb)	Promoter	1	5485853	5503665	17813	1	140622	NM_001082796	1205	ENSDARG00000016706	5-aminoimidazole-4-carboxamide ribonucleotide formyltransferase/IMP cyclohydrolase	1.37641	2.16776	1.18608	4.0608	9.1648	7.31492	1.54795	1.70069	4.99517	5.0859	1.64027	3.21725	atic_1205	3.56493	3.73465
atic	488.96	1385.06	789.405	1381.31	740.769	720.198	1058.91	802.276	563.042	1150.36	1028.99	919.025	0.109303	0.337327	0.745917	0.817824	chr1	5492965	5493234	chr1:5492965-5493234	270	*	Intron (NM_001082796/140622, intron 5 of 14)	Intron	1	5485853	5503665	17813	1	140622	NM_001082796	7112	ENSDARG00000016706	5-aminoimidazole-4-carboxamide ribonucleotide formyltransferase/IMP cyclohydrolase	1.37641	1.08388	4.74432	7.10641	14.1638	1.46298	1.54795	1.70069	13.7367	16.4544	12.302	11.2604	atic_7112	4.1483	13.4384
atic	488.96	1385.06	789.405	1381.31	740.769	720.198	1058.91	802.276	563.042	1150.36	1028.99	919.025	0.109303	0.337327	0.745917	0.817824	chr1	5498567	5498687	chr1:5498567-5498687	121	*	Intron (NM_001082796/140622, intron 10 of 14)	Intron	1	5485853	5503665	17813	1	140622	NM_001082796	12714	ENSDARG00000016706	5-aminoimidazole-4-carboxamide ribonucleotide formyltransferase/IMP cyclohydrolase	1.37641	1.08388	1.18608	7.10641	0.833164	4.38895	3.0959	1.70069	11.2391	7.77844	17.2228	12.869	atic_12714	2.59643	12.2774
atic	488.96	1385.06	789.405	1381.31	740.769	720.198	1058.91	802.276	563.042	1150.36	1028.99	919.025	0.109303	0.337327	0.745917	0.817824	chr1	5500756	5500958	chr1:5500756-5500958	203	*	Exon (NM_001082796/140622, exon 13 of 15)	Exon	1	5485853	5503665	17813	1	140622	NM_001082796	14903	ENSDARG00000016706	5-aminoimidazole-4-carboxamide ribonucleotide formyltransferase/IMP cyclohydrolase	4.12924	1.08388	3.55824	5.076	0.833164	16.0928	17.0274	5.10206	11.2391	5.98341	6.56108	11.2604	atic_14903	6.61286	8.761
atic	488.96	1385.06	789.405	1381.31	740.769	720.198	1058.91	802.276	563.042	1150.36	1028.99	919.025	0.109303	0.337327	0.745917	0.817824	chr1	5503220	5503495	chr1:5503220-5503495	276	*	Exon (NM_001082796/140622, exon 15 of 15)	Exon	1	5485853	5503665	17813	1	140622	NM_001082796	17367	ENSDARG00000016706	5-aminoimidazole-4-carboxamide ribonucleotide formyltransferase/IMP cyclohydrolase	4.12924	11.9227	10.6747	4.0608	19.1628	32.1857	12.3836	17.0069	6.24397	10.471	2.46041	1.60862	atic_17367	13.9408	5.19599
atoh8	1.44023	10.6135	116.008	42.9104	111.083	152.809	56.0792	151.602	448.993	78.0656	141.93	119.23	-1.60429	0.818826	0.0500828	0.0981093	chr14	9494825	9494962	chr14:9494825-9494962	138	*	Distal Intergenic	Distal Intergenic	14	9507329	9522377	15049	2	561606	NM_001079991	27415	ENSDARG00000037555	atonal bHLH transcription factor 8	12.3877	5.41939	1.18608	1.0152	0.833164	10.2409	7.73974	13.6055	8.74155	1.19668	0.820135	1.60862	atoh8_27415	6.55346	3.09175
atoh8	1.44023	10.6135	116.008	42.9104	111.083	152.809	56.0792	151.602	448.993	78.0656	141.93	119.23	-1.60429	0.818826	0.0500828	0.0981093	chr14	9525013	9525161	chr14:9525013-9525161	149	*	Promoter (2-3kb)	Promoter	14	9507329	9522377	15049	2	561606	NM_001079991	-2636	ENSDARG00000037555	atonal bHLH transcription factor 8	1.37641	1.08388	1.18608	5.076	7.49848	1.46298	13.9315	1.70069	6.24397	8.97512	0.820135	4.82587	atoh8_-2636	4.16451	5.21627
atoh8	1.44023	10.6135	116.008	42.9104	111.083	152.809	56.0792	151.602	448.993	78.0656	141.93	119.23	-1.60429	0.818826	0.0500828	0.0981093	chr14	9544273	9544418	chr14:9544273-9544418	146	*	Distal Intergenic	Distal Intergenic	14	9507329	9522377	15049	2	561606	NM_001079991	-21896	ENSDARG00000037555	atonal bHLH transcription factor 8	1.37641	1.08388	7.11648	7.10641	0.833164	10.2409	17.0274	11.9048	1.24879	1.19668	0.820135	1.60862	atoh8_-21896	7.08618	1.21856
atoh8	1.44023	10.6135	116.008	42.9104	111.083	152.809	56.0792	151.602	448.993	78.0656	141.93	119.23	-1.60429	0.818826	0.0500828	0.0981093	chr14	9550277	9550431	chr14:9550277-9550431	155	*	Distal Intergenic	Distal Intergenic	14	9507329	9522377	15049	2	561606	NM_001079991	-27900	ENSDARG00000037555	atonal bHLH transcription factor 8	9.63489	3.25164	5.9304	1.0152	2.49949	1.46298	1.54795	1.70069	8.74155	5.68424	0.820135	1.60862	atoh8_-27900	3.3804	4.21364
atp1b3a	365.099	407.103	475.016	502.665	446.959	115.604	795.005	109.552	348.15	500.798	545.696	419.241	0.126495	0.491455	0.796878	0.856827	chr2	16547309	16547753	chr2:16547309-16547753	445	*	3' UTR	3' UTR	2	16547706	16565688	17983	2	30468	NM_131221	17935	ENSDARG00000015790	ATPase Na+/K+ transporting subunit beta 3a	52.3037	23.8453	37.9545	42.6384	57.4883	98.02	88.233	79.9323	27.4734	18.2494	12.302	14.4776	atp1b3a_17935	60.052	18.1256
atp1b3a	365.099	407.103	475.016	502.665	446.959	115.604	795.005	109.552	348.15	500.798	545.696	419.241	0.126495	0.491455	0.796878	0.856827	chr2	16548512	16548983	chr2:16548512-16548983	472	*	3' UTR	3' UTR	2	16547706	16565688	17983	2	30468	NM_131221	16705	ENSDARG00000015790	ATPase Na+/K+ transporting subunit beta 3a	11.0113	5.41939	8.30256	37.5624	39.9919	93.631	17.0274	25.5103	14.9855	10.471	13.9423	17.6949	atp1b3a_16705	29.807	14.2734
atp1b3a	365.099	407.103	475.016	502.665	446.959	115.604	795.005	109.552	348.15	500.798	545.696	419.241	0.126495	0.491455	0.796878	0.856827	chr2	16564273	16564631	chr2:16564273-16564631	359	*	Promoter (1-2kb)	Promoter	2	16547706	16565688	17983	2	30468	NM_131221	1057	ENSDARG00000015790	ATPase Na+/K+ transporting subunit beta 3a	2.75282	1.08388	24.9077	22.3344	14.1638	26.3337	29.411	15.3062	13.7367	11.3685	12.302	11.2604	atp1b3a_1057	17.0367	12.1669
atp1b3a	365.099	407.103	475.016	502.665	446.959	115.604	795.005	109.552	348.15	500.798	545.696	419.241	0.126495	0.491455	0.796878	0.856827	chr2	16565056	16565791	chr2:16565056-16565791	736	*	Promoter (<=1kb)	Promoter	2	16547706	16565688	17983	2	30468	NM_131221	0	ENSDARG00000015790	ATPase Na+/K+ transporting subunit beta 3a	39.916	11.9227	46.2571	43.6536	29.9939	96.557	71.2056	61.2248	41.2102	17.3519	15.5826	32.1725	atp1b3a_0	50.0913	26.5793
atp1b3a	365.099	407.103	475.016	502.665	446.959	115.604	795.005	109.552	348.15	500.798	545.696	419.241	0.126495	0.491455	0.796878	0.856827	chr2	16578626	16578878	chr2:16578626-16578878	253	*	Distal Intergenic	Distal Intergenic	2	16547706	16565688	17983	2	30468	NM_131221	-12938	ENSDARG00000015790	ATPase Na+/K+ transporting subunit beta 3a	15.1405	1.08388	27.2798	14.2128	12.4975	16.0928	75.8495	22.1089	1.24879	3.59005	10.6618	1.60862	atp1b3a_-12938	23.0332	4.27731
bace2	12252.1	8452.13	5621.25	15545.8	12331.5	1203.87	2449.89	1529.3	4907.71	1951.64	1261.46	6136.97	2.28952	0.425039	7.18035e-08	5.14779e-07	chr15	6191742	6192018	chr15:6191742-6192018	277	*	Distal Intergenic	Distal Intergenic	15	6459847	6493616	33770	1	449818	NM_001005991	-267829	ENSDARG00000044781	beta-secretase 2	1.37641	7.58715	5.9304	5.076	0.833164	4.38895	12.3836	1.70069	12.4879	12.8643	10.6618	1.60862	bace2_-267829	4.90954	9.40566
bace2	12252.1	8452.13	5621.25	15545.8	12331.5	1203.87	2449.89	1529.3	4907.71	1951.64	1261.46	6136.97	2.28952	0.425039	7.18035e-08	5.14779e-07	chr15	6195400	6195658	chr15:6195400-6195658	259	*	Distal Intergenic	Distal Intergenic	15	6459847	6493616	33770	1	449818	NM_001005991	-264189	ENSDARG00000044781	beta-secretase 2	20.6462	17.3421	34.3963	22.3344	33.3266	29.2597	30.959	11.9048	7.49276	4.18839	5.74095	1.60862	bace2_-264189	25.0211	4.75768
bace2	12252.1	8452.13	5621.25	15545.8	12331.5	1203.87	2449.89	1529.3	4907.71	1951.64	1261.46	6136.97	2.28952	0.425039	7.18035e-08	5.14779e-07	chr15	6198646	6199146	chr15:6198646-6199146	501	*	Distal Intergenic	Distal Intergenic	15	6459847	6493616	33770	1	449818	NM_001005991	-260701	ENSDARG00000044781	beta-secretase 2	203.709	231.95	479.176	250.755	256.615	172.632	150.151	149.661	22.4783	15.2577	18.8631	19.3035	bace2_-260701	236.831	18.9756
bace2	12252.1	8452.13	5621.25	15545.8	12331.5	1203.87	2449.89	1529.3	4907.71	1951.64	1261.46	6136.97	2.28952	0.425039	7.18035e-08	5.14779e-07	chr15	6204567	6204794	chr15:6204567-6204794	228	*	Distal Intergenic	Distal Intergenic	15	6459847	6493616	33770	1	449818	NM_001005991	-255053	ENSDARG00000044781	beta-secretase 2	27.5282	17.3421	79.4673	11.1672	15.8301	19.0188	12.3836	1.70069	1.24879	3.88922	2.46041	16.0862	bace2_-255053	23.0548	5.92117
bace2	12252.1	8452.13	5621.25	15545.8	12331.5	1203.87	2449.89	1529.3	4907.71	1951.64	1261.46	6136.97	2.28952	0.425039	7.18035e-08	5.14779e-07	chr15	6234046	6234341	chr15:6234046-6234341	296	*	Distal Intergenic	Distal Intergenic	15	6459847	6493616	33770	1	449818	NM_001005991	-225506	ENSDARG00000044781	beta-secretase 2	15.1405	4.33551	1.18608	5.076	2.49949	1.46298	1.54795	5.10206	11.2391	9.87263	6.56108	8.04312	bace2_-225506	4.54383	8.92899
bace2	12252.1	8452.13	5621.25	15545.8	12331.5	1203.87	2449.89	1529.3	4907.71	1951.64	1261.46	6136.97	2.28952	0.425039	7.18035e-08	5.14779e-07	chr15	6244262	6244429	chr15:6244262-6244429	168	*	Distal Intergenic	Distal Intergenic	15	6459847	6493616	33770	1	449818	NM_001005991	-215418	ENSDARG00000044781	beta-secretase 2	1.37641	3.25164	7.11648	3.0456	2.49949	1.46298	1.54795	5.10206	11.2391	5.0859	4.92081	8.04312	bace2_-215418	3.17533	7.32224
bace2	12252.1	8452.13	5621.25	15545.8	12331.5	1203.87	2449.89	1529.3	4907.71	1951.64	1261.46	6136.97	2.28952	0.425039	7.18035e-08	5.14779e-07	chr15	6247599	6247728	chr15:6247599-6247728	130	*	Distal Intergenic	Distal Intergenic	15	6459847	6493616	33770	1	449818	NM_001005991	-212119	ENSDARG00000044781	beta-secretase 2	1.37641	1.08388	5.9304	1.0152	2.49949	4.38895	1.54795	3.40138	7.49276	6.58176	0.820135	16.0862	bace2_-212119	2.65546	7.74522
bace2	12252.1	8452.13	5621.25	15545.8	12331.5	1203.87	2449.89	1529.3	4907.71	1951.64	1261.46	6136.97	2.28952	0.425039	7.18035e-08	5.14779e-07	chr15	6248265	6248486	chr15:6248265-6248486	222	*	Distal Intergenic	Distal Intergenic	15	6459847	6493616	33770	1	449818	NM_001005991	-211361	ENSDARG00000044781	beta-secretase 2	11.0113	9.75491	15.419	13.1976	4.99898	1.46298	9.28769	10.2041	1.24879	4.18839	3.28054	1.60862	bace2_-211361	9.41708	2.58159
bace2	12252.1	8452.13	5621.25	15545.8	12331.5	1203.87	2449.89	1529.3	4907.71	1951.64	1261.46	6136.97	2.28952	0.425039	7.18035e-08	5.14779e-07	chr15	6251814	6252024	chr15:6251814-6252024	211	*	Distal Intergenic	Distal Intergenic	15	6459847	6493616	33770	1	449818	NM_001005991	-207823	ENSDARG00000044781	beta-secretase 2	4.12924	1.08388	4.74432	1.0152	0.833164	1.46298	1.54795	1.70069	1.24879	7.47927	2.46041	19.3035	bace2_-207823	2.06468	7.62299
bace2	12252.1	8452.13	5621.25	15545.8	12331.5	1203.87	2449.89	1529.3	4907.71	1951.64	1261.46	6136.97	2.28952	0.425039	7.18035e-08	5.14779e-07	chr15	6260191	6260316	chr15:6260191-6260316	126	*	Distal Intergenic	Distal Intergenic	15	6459847	6493616	33770	1	449818	NM_001005991	-199531	ENSDARG00000044781	beta-secretase 2	1.37641	7.58715	15.419	7.10641	4.16582	10.2409	7.73974	13.6055	13.7367	11.6677	11.4819	14.4776	bace2_-199531	8.40512	12.841
bace2	12252.1	8452.13	5621.25	15545.8	12331.5	1203.87	2449.89	1529.3	4907.71	1951.64	1261.46	6136.97	2.28952	0.425039	7.18035e-08	5.14779e-07	chr15	6264465	6264726	chr15:6264465-6264726	262	*	Distal Intergenic	Distal Intergenic	15	6459847	6493616	33770	1	449818	NM_001005991	-195121	ENSDARG00000044781	beta-secretase 2	1.37641	7.58715	5.9304	1.0152	0.833164	4.38895	1.54795	8.50344	1.24879	8.97512	16.4027	6.4345	bace2_-195121	3.89783	8.26528
bace2	12252.1	8452.13	5621.25	15545.8	12331.5	1203.87	2449.89	1529.3	4907.71	1951.64	1261.46	6136.97	2.28952	0.425039	7.18035e-08	5.14779e-07	chr15	6278064	6278271	chr15:6278064-6278271	208	*	Distal Intergenic	Distal Intergenic	15	6459847	6493616	33770	1	449818	NM_001005991	-181576	ENSDARG00000044781	beta-secretase 2	5.50565	1.08388	4.74432	1.0152	0.833164	1.46298	7.73974	1.70069	9.99034	9.87263	11.4819	9.65175	bace2_-181576	3.0107	10.2492
bace2	12252.1	8452.13	5621.25	15545.8	12331.5	1203.87	2449.89	1529.3	4907.71	1951.64	1261.46	6136.97	2.28952	0.425039	7.18035e-08	5.14779e-07	chr15	6281649	6281981	chr15:6281649-6281981	333	*	Distal Intergenic	Distal Intergenic	15	6459847	6493616	33770	1	449818	NM_001005991	-177866	ENSDARG00000044781	beta-secretase 2	42.6688	31.4325	5.9304	11.1672	8.33164	4.38895	1.54795	13.6055	21.2295	9.27429	28.7047	46.6501	bace2_-177866	14.8841	26.4647
bace2	12252.1	8452.13	5621.25	15545.8	12331.5	1203.87	2449.89	1529.3	4907.71	1951.64	1261.46	6136.97	2.28952	0.425039	7.18035e-08	5.14779e-07	chr15	6286111	6286238	chr15:6286111-6286238	128	*	Distal Intergenic	Distal Intergenic	15	6459847	6493616	33770	1	449818	NM_001005991	-173609	ENSDARG00000044781	beta-secretase 2	1.37641	1.08388	8.30256	3.0456	8.33164	1.46298	1.54795	11.9048	14.9855	4.78673	7.38122	4.82587	bace2_-173609	4.63198	7.99483
bace2	12252.1	8452.13	5621.25	15545.8	12331.5	1203.87	2449.89	1529.3	4907.71	1951.64	1261.46	6136.97	2.28952	0.425039	7.18035e-08	5.14779e-07	chr15	6289971	6290089	chr15:6289971-6290089	119	*	Distal Intergenic	Distal Intergenic	15	6459847	6493616	33770	1	449818	NM_001005991	-169758	ENSDARG00000044781	beta-secretase 2	12.3877	5.41939	1.18608	1.0152	0.833164	1.46298	4.64384	1.70069	24.9759	6.58176	13.1222	11.2604	bace2_-169758	3.58113	13.985
bace2	12252.1	8452.13	5621.25	15545.8	12331.5	1203.87	2449.89	1529.3	4907.71	1951.64	1261.46	6136.97	2.28952	0.425039	7.18035e-08	5.14779e-07	chr15	6298265	6298546	chr15:6298265-6298546	282	*	Distal Intergenic	Distal Intergenic	15	6459847	6493616	33770	1	449818	NM_001005991	-161301	ENSDARG00000044781	beta-secretase 2	6.88206	16.2582	32.0241	11.1672	6.66531	1.46298	4.64384	5.10206	4.99517	8.07761	7.38122	9.65175	bace2_-161301	10.5257	7.52644
bace2	12252.1	8452.13	5621.25	15545.8	12331.5	1203.87	2449.89	1529.3	4907.71	1951.64	1261.46	6136.97	2.28952	0.425039	7.18035e-08	5.14779e-07	chr15	6304846	6305079	chr15:6304846-6305079	234	*	Distal Intergenic	Distal Intergenic	15	6459847	6493616	33770	1	449818	NM_001005991	-154768	ENSDARG00000044781	beta-secretase 2	1.37641	10.8388	2.37216	5.076	8.33164	1.46298	4.64384	5.10206	4.99517	7.1801	12.302	8.04312	bace2_-154768	4.90049	8.1301
bace2	12252.1	8452.13	5621.25	15545.8	12331.5	1203.87	2449.89	1529.3	4907.71	1951.64	1261.46	6136.97	2.28952	0.425039	7.18035e-08	5.14779e-07	chr15	6305096	6305316	chr15:6305096-6305316	221	*	Distal Intergenic	Distal Intergenic	15	6459847	6493616	33770	1	449818	NM_001005991	-154531	ENSDARG00000044781	beta-secretase 2	6.88206	13.0065	4.74432	7.10641	12.4975	1.46298	1.54795	6.80275	14.9855	6.58176	12.302	12.869	bace2_-154531	6.75631	11.6846
bace2	12252.1	8452.13	5621.25	15545.8	12331.5	1203.87	2449.89	1529.3	4907.71	1951.64	1261.46	6136.97	2.28952	0.425039	7.18035e-08	5.14779e-07	chr15	6308969	6309584	chr15:6308969-6309584	616	*	Distal Intergenic	Distal Intergenic	15	6459847	6493616	33770	1	449818	NM_001005991	-150263	ENSDARG00000044781	beta-secretase 2	23.399	78.0393	36.7685	32.4864	46.6572	36.5746	4.64384	1.70069	28.7222	14.061	22.1436	16.0862	bace2_-150263	32.5337	20.2533
bace2	12252.1	8452.13	5621.25	15545.8	12331.5	1203.87	2449.89	1529.3	4907.71	1951.64	1261.46	6136.97	2.28952	0.425039	7.18035e-08	5.14779e-07	chr15	6312159	6312332	chr15:6312159-6312332	174	*	Distal Intergenic	Distal Intergenic	15	6459847	6493616	33770	1	449818	NM_001005991	-147515	ENSDARG00000044781	beta-secretase 2	6.88206	11.9227	18.9773	3.0456	4.99898	4.38895	4.64384	5.10206	13.7367	5.0859	7.38122	1.60862	bace2_-147515	7.49518	6.95312
bace2	12252.1	8452.13	5621.25	15545.8	12331.5	1203.87	2449.89	1529.3	4907.71	1951.64	1261.46	6136.97	2.28952	0.425039	7.18035e-08	5.14779e-07	chr15	6312669	6312882	chr15:6312669-6312882	214	*	Distal Intergenic	Distal Intergenic	15	6459847	6493616	33770	1	449818	NM_001005991	-146965	ENSDARG00000044781	beta-secretase 2	8.25847	5.41939	14.233	3.0456	19.9959	1.46298	6.19179	1.70069	1.24879	8.37678	5.74095	1.60862	bace2_-146965	7.53848	4.24379
bace2	12252.1	8452.13	5621.25	15545.8	12331.5	1203.87	2449.89	1529.3	4907.71	1951.64	1261.46	6136.97	2.28952	0.425039	7.18035e-08	5.14779e-07	chr15	6319495	6320057	chr15:6319495-6320057	563	*	Distal Intergenic	Distal Intergenic	15	6459847	6493616	33770	1	449818	NM_001005991	-139790	ENSDARG00000044781	beta-secretase 2	1.37641	7.58715	10.6747	18.2736	17.4964	7.31492	6.19179	8.50344	16.2343	16.7536	11.4819	16.0862	bace2_-139790	9.67731	15.139
bace2	12252.1	8452.13	5621.25	15545.8	12331.5	1203.87	2449.89	1529.3	4907.71	1951.64	1261.46	6136.97	2.28952	0.425039	7.18035e-08	5.14779e-07	chr15	6322856	6323112	chr15:6322856-6323112	257	*	Distal Intergenic	Distal Intergenic	15	6459847	6493616	33770	1	449818	NM_001005991	-136735	ENSDARG00000044781	beta-secretase 2	6.88206	5.41939	7.11648	11.1672	2.49949	1.46298	4.64384	5.10206	4.99517	9.27429	9.02149	3.21725	bace2_-136735	5.53669	6.62705
bace2	12252.1	8452.13	5621.25	15545.8	12331.5	1203.87	2449.89	1529.3	4907.71	1951.64	1261.46	6136.97	2.28952	0.425039	7.18035e-08	5.14779e-07	chr15	6329206	6329338	chr15:6329206-6329338	133	*	Distal Intergenic	Distal Intergenic	15	6459847	6493616	33770	1	449818	NM_001005991	-130509	ENSDARG00000044781	beta-secretase 2	1.37641	9.75491	1.18608	3.0456	0.833164	1.46298	1.54795	1.70069	3.74638	5.0859	6.56108	12.869	bace2_-130509	2.61347	7.06559
bace2	12252.1	8452.13	5621.25	15545.8	12331.5	1203.87	2449.89	1529.3	4907.71	1951.64	1261.46	6136.97	2.28952	0.425039	7.18035e-08	5.14779e-07	chr15	6353365	6353642	chr15:6353365-6353642	278	*	Distal Intergenic	Distal Intergenic	15	6459847	6493616	33770	1	449818	NM_001005991	-106205	ENSDARG00000044781	beta-secretase 2	1.37641	1.08388	1.18608	1.0152	0.833164	1.46298	1.54795	1.70069	16.2343	4.48756	11.4819	3.21725	bace2_-106205	1.27579	8.85525
bace2	12252.1	8452.13	5621.25	15545.8	12331.5	1203.87	2449.89	1529.3	4907.71	1951.64	1261.46	6136.97	2.28952	0.425039	7.18035e-08	5.14779e-07	chr15	6362992	6363328	chr15:6362992-6363328	337	*	Distal Intergenic	Distal Intergenic	15	6459847	6493616	33770	1	449818	NM_001005991	-96519	ENSDARG00000044781	beta-secretase 2	22.0226	9.75491	9.48864	11.1672	14.997	1.46298	3.0959	1.70069	8.74155	11.6677	9.84162	8.04312	bace2_-96519	9.21123	9.57349
bace2	12252.1	8452.13	5621.25	15545.8	12331.5	1203.87	2449.89	1529.3	4907.71	1951.64	1261.46	6136.97	2.28952	0.425039	7.18035e-08	5.14779e-07	chr15	6367045	6367164	chr15:6367045-6367164	120	*	Distal Intergenic	Distal Intergenic	15	6459847	6493616	33770	1	449818	NM_001005991	-92683	ENSDARG00000044781	beta-secretase 2	1.37641	11.9227	13.0469	5.076	7.49848	10.2409	10.8356	8.50344	18.7319	19.1469	5.74095	19.3035	bace2_-92683	8.56255	15.7308
bace2	12252.1	8452.13	5621.25	15545.8	12331.5	1203.87	2449.89	1529.3	4907.71	1951.64	1261.46	6136.97	2.28952	0.425039	7.18035e-08	5.14779e-07	chr15	6367422	6367686	chr15:6367422-6367686	265	*	Distal Intergenic	Distal Intergenic	15	6459847	6493616	33770	1	449818	NM_001005991	-92161	ENSDARG00000044781	beta-secretase 2	1.37641	13.0065	4.74432	1.0152	2.49949	2.92597	1.54795	1.70069	3.74638	5.68424	9.02149	1.60862	bace2_-92161	3.60207	5.01518
bace2	12252.1	8452.13	5621.25	15545.8	12331.5	1203.87	2449.89	1529.3	4907.71	1951.64	1261.46	6136.97	2.28952	0.425039	7.18035e-08	5.14779e-07	chr15	6376657	6377346	chr15:6376657-6377346	690	*	Distal Intergenic	Distal Intergenic	15	6459847	6493616	33770	1	449818	NM_001005991	-82501	ENSDARG00000044781	beta-secretase 2	23.399	40.1035	58.1179	15.228	25.8281	38.0376	35.6028	15.3062	13.7367	25.4295	24.6041	32.1725	bace2_-82501	31.4529	23.9857
bace2	12252.1	8452.13	5621.25	15545.8	12331.5	1203.87	2449.89	1529.3	4907.71	1951.64	1261.46	6136.97	2.28952	0.425039	7.18035e-08	5.14779e-07	chr15	6382603	6382950	chr15:6382603-6382950	348	*	Distal Intergenic	Distal Intergenic	15	6459847	6493616	33770	1	449818	NM_001005991	-76897	ENSDARG00000044781	beta-secretase 2	20.6462	14.0904	26.0937	3.0456	2.49949	1.46298	1.54795	1.70069	7.49276	8.37678	4.10068	8.04312	bace2_-76897	8.88588	7.00333
bace2	12252.1	8452.13	5621.25	15545.8	12331.5	1203.87	2449.89	1529.3	4907.71	1951.64	1261.46	6136.97	2.28952	0.425039	7.18035e-08	5.14779e-07	chr15	6382997	6383164	chr15:6382997-6383164	168	*	Distal Intergenic	Distal Intergenic	15	6459847	6493616	33770	1	449818	NM_001005991	-76683	ENSDARG00000044781	beta-secretase 2	4.12924	9.75491	3.55824	1.0152	2.49949	1.46298	4.64384	1.70069	7.49276	6.28258	0.820135	1.60862	bace2_-76683	3.59557	4.05103
bace2	12252.1	8452.13	5621.25	15545.8	12331.5	1203.87	2449.89	1529.3	4907.71	1951.64	1261.46	6136.97	2.28952	0.425039	7.18035e-08	5.14779e-07	chr15	6384518	6385088	chr15:6384518-6385088	571	*	Distal Intergenic	Distal Intergenic	15	6459847	6493616	33770	1	449818	NM_001005991	-74759	ENSDARG00000044781	beta-secretase 2	16.5169	26.0131	9.48864	5.076	7.49848	14.6298	1.54795	13.6055	11.2391	15.856	27.0645	14.4776	bace2_-74759	11.7971	17.1593
bace2	12252.1	8452.13	5621.25	15545.8	12331.5	1203.87	2449.89	1529.3	4907.71	1951.64	1261.46	6136.97	2.28952	0.425039	7.18035e-08	5.14779e-07	chr15	6390641	6390765	chr15:6390641-6390765	125	*	Distal Intergenic	Distal Intergenic	15	6459847	6493616	33770	1	449818	NM_001005991	-69082	ENSDARG00000044781	beta-secretase 2	4.12924	3.25164	8.30256	1.0152	2.49949	4.38895	1.54795	20.4083	16.2343	6.28258	2.46041	1.60862	bace2_-69082	5.69291	6.64648
bace2	12252.1	8452.13	5621.25	15545.8	12331.5	1203.87	2449.89	1529.3	4907.71	1951.64	1261.46	6136.97	2.28952	0.425039	7.18035e-08	5.14779e-07	chr15	6404262	6404761	chr15:6404262-6404761	500	*	Distal Intergenic	Distal Intergenic	15	6459847	6493616	33770	1	449818	NM_001005991	-55086	ENSDARG00000044781	beta-secretase 2	1.37641	6.50327	8.30256	1.0152	9.1648	1.46298	1.54795	5.10206	19.9807	16.7536	15.5826	8.04312	bace2_-55086	4.30941	15.09
bace2	12252.1	8452.13	5621.25	15545.8	12331.5	1203.87	2449.89	1529.3	4907.71	1951.64	1261.46	6136.97	2.28952	0.425039	7.18035e-08	5.14779e-07	chr15	6404969	6405181	chr15:6404969-6405181	213	*	Distal Intergenic	Distal Intergenic	15	6459847	6493616	33770	1	449818	NM_001005991	-54666	ENSDARG00000044781	beta-secretase 2	17.8934	9.75491	3.55824	13.1976	2.49949	7.31492	1.54795	5.10206	6.24397	6.88093	14.7624	9.65175	bace2_-54666	7.60857	9.38477
bace2	12252.1	8452.13	5621.25	15545.8	12331.5	1203.87	2449.89	1529.3	4907.71	1951.64	1261.46	6136.97	2.28952	0.425039	7.18035e-08	5.14779e-07	chr15	6411381	6411500	chr15:6411381-6411500	120	*	Distal Intergenic	Distal Intergenic	15	6459847	6493616	33770	1	449818	NM_001005991	-48347	ENSDARG00000044781	beta-secretase 2	12.3877	5.41939	1.18608	1.0152	0.833164	1.46298	1.54795	3.40138	46.2053	3.59005	15.5826	17.6949	bace2_-48347	3.40673	20.7682
bace2	12252.1	8452.13	5621.25	15545.8	12331.5	1203.87	2449.89	1529.3	4907.71	1951.64	1261.46	6136.97	2.28952	0.425039	7.18035e-08	5.14779e-07	chr15	6416677	6416942	chr15:6416677-6416942	266	*	Distal Intergenic	Distal Intergenic	15	6459847	6493616	33770	1	449818	NM_001005991	-42905	ENSDARG00000044781	beta-secretase 2	17.8934	45.5229	15.419	9.13681	4.16582	4.38895	7.73974	8.50344	1.24879	2.99171	2.46041	8.04312	bace2_-42905	14.0963	3.68601
bace2	12252.1	8452.13	5621.25	15545.8	12331.5	1203.87	2449.89	1529.3	4907.71	1951.64	1261.46	6136.97	2.28952	0.425039	7.18035e-08	5.14779e-07	chr15	6420859	6421090	chr15:6420859-6421090	232	*	Distal Intergenic	Distal Intergenic	15	6459847	6493616	33770	1	449818	NM_001005991	-38757	ENSDARG00000044781	beta-secretase 2	1.37641	7.58715	5.9304	1.0152	1.66633	7.31492	1.54795	1.70069	3.74638	6.28258	13.9423	1.60862	bace2_-38757	3.51738	6.39497
bace2	12252.1	8452.13	5621.25	15545.8	12331.5	1203.87	2449.89	1529.3	4907.71	1951.64	1261.46	6136.97	2.28952	0.425039	7.18035e-08	5.14779e-07	chr15	6427263	6427768	chr15:6427263-6427768	506	*	Distal Intergenic	Distal Intergenic	15	6459847	6493616	33770	1	449818	NM_001005991	-32079	ENSDARG00000044781	beta-secretase 2	163.793	298.067	349.893	181.721	275.777	215.059	75.8495	188.776	18.7319	13.7619	19.6832	24.1294	bace2_-32079	218.617	19.0766
bace2	12252.1	8452.13	5621.25	15545.8	12331.5	1203.87	2449.89	1529.3	4907.71	1951.64	1261.46	6136.97	2.28952	0.425039	7.18035e-08	5.14779e-07	chr15	6432621	6433522	chr15:6432621-6433522	902	*	Distal Intergenic	Distal Intergenic	15	6459847	6493616	33770	1	449818	NM_001005991	-26325	ENSDARG00000044781	beta-secretase 2	326.21	266.634	689.112	236.542	394.92	213.596	236.836	185.375	31.2198	18.2494	20.5034	36.9984	bace2_-26325	318.653	26.7427
bace2	12252.1	8452.13	5621.25	15545.8	12331.5	1203.87	2449.89	1529.3	4907.71	1951.64	1261.46	6136.97	2.28952	0.425039	7.18035e-08	5.14779e-07	chr15	6448459	6448822	chr15:6448459-6448822	364	*	Distal Intergenic	Distal Intergenic	15	6459847	6493616	33770	1	449818	NM_001005991	-11025	ENSDARG00000044781	beta-secretase 2	5.50565	15.1743	13.0469	7.10641	7.49848	5.85194	10.8356	10.2041	16.2343	20.6428	31.1651	28.9552	bace2_-11025	9.40293	24.2494
bace2	12252.1	8452.13	5621.25	15545.8	12331.5	1203.87	2449.89	1529.3	4907.71	1951.64	1261.46	6136.97	2.28952	0.425039	7.18035e-08	5.14779e-07	chr15	6454322	6454594	chr15:6454322-6454594	273	*	Distal Intergenic	Distal Intergenic	15	6459847	6493616	33770	1	449818	NM_001005991	-5253	ENSDARG00000044781	beta-secretase 2	1.37641	7.58715	17.7912	5.076	10.8311	19.0188	7.73974	22.1089	1.24879	8.37678	13.1222	1.60862	bace2_-5253	11.4412	6.08909
bace2	12252.1	8452.13	5621.25	15545.8	12331.5	1203.87	2449.89	1529.3	4907.71	1951.64	1261.46	6136.97	2.28952	0.425039	7.18035e-08	5.14779e-07	chr15	6459689	6460130	chr15:6459689-6460130	442	*	Promoter (<=1kb)	Promoter	15	6459847	6493616	33770	1	449818	NM_001005991	0	ENSDARG00000044781	beta-secretase 2	104.607	71.536	288.217	181.721	124.141	215.059	106.808	73.1296	18.7319	13.7619	21.3235	17.6949	bace2_0	145.652	17.878
bace2	12252.1	8452.13	5621.25	15545.8	12331.5	1203.87	2449.89	1529.3	4907.71	1951.64	1261.46	6136.97	2.28952	0.425039	7.18035e-08	5.14779e-07	chr15	6461509	6461944	chr15:6461509-6461944	436	*	Promoter (1-2kb)	Promoter	15	6459847	6493616	33770	1	449818	NM_001005991	1662	ENSDARG00000044781	beta-secretase 2	315.198	218.943	655.902	301.515	268.279	198.966	156.343	113.946	23.7271	12.266	10.6618	17.6949	bace2_1662	278.637	16.0874
bace2	12252.1	8452.13	5621.25	15545.8	12331.5	1203.87	2449.89	1529.3	4907.71	1951.64	1261.46	6136.97	2.28952	0.425039	7.18035e-08	5.14779e-07	chr15	6472761	6473036	chr15:6472761-6473036	276	*	Intron (NM_001005991/449818, intron 1 of 6)	Intron	15	6459847	6493616	33770	1	449818	NM_001005991	12914	ENSDARG00000044781	beta-secretase 2	17.8934	14.0904	41.5128	7.10641	5.83215	8.77791	4.64384	11.9048	1.24879	0.897512	2.46041	1.60862	bace2_12914	13.9702	1.55383
bace2	12252.1	8452.13	5621.25	15545.8	12331.5	1203.87	2449.89	1529.3	4907.71	1951.64	1261.46	6136.97	2.28952	0.425039	7.18035e-08	5.14779e-07	chr15	6474940	6475193	chr15:6474940-6475193	254	*	Intron (NM_001005991/449818, intron 1 of 6)	Intron	15	6459847	6493616	33770	1	449818	NM_001005991	15093	ENSDARG00000044781	beta-secretase 2	9.63489	9.75491	32.0241	13.1976	21.6623	7.31492	7.73974	6.80275	9.99034	7.77844	3.28054	27.3466	bace2_15093	13.5164	12.099
bace2	12252.1	8452.13	5621.25	15545.8	12331.5	1203.87	2449.89	1529.3	4907.71	1951.64	1261.46	6136.97	2.28952	0.425039	7.18035e-08	5.14779e-07	chr15	6481896	6482099	chr15:6481896-6482099	204	*	Exon (NM_001005991/449818, exon 3 of 7)	Exon	15	6459847	6493616	33770	1	449818	NM_001005991	22049	ENSDARG00000044781	beta-secretase 2	6.88206	5.41939	7.11648	1.0152	4.16582	1.46298	3.0959	1.70069	12.4879	7.1801	9.84162	12.869	bace2_22049	3.85732	10.5947
bace2	12252.1	8452.13	5621.25	15545.8	12331.5	1203.87	2449.89	1529.3	4907.71	1951.64	1261.46	6136.97	2.28952	0.425039	7.18035e-08	5.14779e-07	chr15	6483398	6483516	chr15:6483398-6483516	119	*	Intron (NM_001005991/449818, intron 3 of 6)	Intron	15	6459847	6493616	33770	1	449818	NM_001005991	23551	ENSDARG00000044781	beta-secretase 2	1.37641	1.08388	5.9304	1.0152	5.83215	7.31492	1.54795	1.70069	1.24879	6.88093	2.46041	14.4776	bace2_23551	3.2252	6.26694
bace2	12252.1	8452.13	5621.25	15545.8	12331.5	1203.87	2449.89	1529.3	4907.71	1951.64	1261.46	6136.97	2.28952	0.425039	7.18035e-08	5.14779e-07	chr15	6488532	6488958	chr15:6488532-6488958	427	*	Intron (NM_001005991/449818, intron 4 of 6)	Intron	15	6459847	6493616	33770	1	449818	NM_001005991	28685	ENSDARG00000044781	beta-secretase 2	86.714	92.1297	153.004	27.4104	28.3276	61.4454	38.6987	66.3268	21.2295	17.9502	9.02149	14.4776	bace2_28685	69.2571	15.6697
bace2	12252.1	8452.13	5621.25	15545.8	12331.5	1203.87	2449.89	1529.3	4907.71	1951.64	1261.46	6136.97	2.28952	0.425039	7.18035e-08	5.14779e-07	chr15	6495058	6495380	chr15:6495058-6495380	323	*	Distal Intergenic	Distal Intergenic	15	6459847	6493616	33770	1	449818	NM_001005991	35211	ENSDARG00000044781	beta-secretase 2	6.88206	8.67103	20.1634	4.0608	8.33164	1.46298	9.28769	1.70069	18.7319	2.09419	4.92081	1.60862	bace2_35211	7.57003	6.83888
bace2	12252.1	8452.13	5621.25	15545.8	12331.5	1203.87	2449.89	1529.3	4907.71	1951.64	1261.46	6136.97	2.28952	0.425039	7.18035e-08	5.14779e-07	chr15	6495452	6495638	chr15:6495452-6495638	187	*	Distal Intergenic	Distal Intergenic	15	6459847	6493616	33770	1	449818	NM_001005991	35605	ENSDARG00000044781	beta-secretase 2	23.399	1.08388	15.419	1.0152	5.83215	1.46298	1.54795	1.70069	2.49759	0.897512	2.46041	1.60862	bace2_35605	6.43261	1.86603
bace2	12252.1	8452.13	5621.25	15545.8	12331.5	1203.87	2449.89	1529.3	4907.71	1951.64	1261.46	6136.97	2.28952	0.425039	7.18035e-08	5.14779e-07	chr15	6498530	6498753	chr15:6498530-6498753	224	*	Distal Intergenic	Distal Intergenic	15	6459847	6493616	33770	1	449818	NM_001005991	38683	ENSDARG00000044781	beta-secretase 2	4.12924	1.08388	3.55824	4.0608	0.833164	13.1669	20.1233	5.10206	8.74155	8.37678	15.5826	8.04312	bace2_38683	6.5072	10.186
bace2	12252.1	8452.13	5621.25	15545.8	12331.5	1203.87	2449.89	1529.3	4907.71	1951.64	1261.46	6136.97	2.28952	0.425039	7.18035e-08	5.14779e-07	chr15	6503771	6503938	chr15:6503771-6503938	168	*	Distal Intergenic	Distal Intergenic	15	6459847	6493616	33770	1	449818	NM_001005991	43924	ENSDARG00000044781	beta-secretase 2	8.25847	13.0065	8.30256	2.0304	0.833164	1.46298	1.54795	3.40138	1.24879	3.88922	6.56108	11.2604	bace2_43924	4.85543	5.73987
bace2	12252.1	8452.13	5621.25	15545.8	12331.5	1203.87	2449.89	1529.3	4907.71	1951.64	1261.46	6136.97	2.28952	0.425039	7.18035e-08	5.14779e-07	chr15	6507685	6507804	chr15:6507685-6507804	120	*	Distal Intergenic	Distal Intergenic	15	6459847	6493616	33770	1	449818	NM_001005991	47838	ENSDARG00000044781	beta-secretase 2	1.37641	7.58715	1.18608	1.0152	4.16582	7.31492	1.54795	15.3062	7.49276	3.88922	0.820135	11.2604	bace2_47838	4.93747	5.86562
bace2	12252.1	8452.13	5621.25	15545.8	12331.5	1203.87	2449.89	1529.3	4907.71	1951.64	1261.46	6136.97	2.28952	0.425039	7.18035e-08	5.14779e-07	chr15	6513305	6513453	chr15:6513305-6513453	149	*	Distal Intergenic	Distal Intergenic	15	6459847	6493616	33770	1	449818	NM_001005991	53458	ENSDARG00000044781	beta-secretase 2	4.12924	9.75491	5.9304	7.10641	5.83215	4.38895	1.54795	6.80275	1.24879	14.9585	7.38122	1.60862	bace2_53458	5.68659	6.29929
bace2	12252.1	8452.13	5621.25	15545.8	12331.5	1203.87	2449.89	1529.3	4907.71	1951.64	1261.46	6136.97	2.28952	0.425039	7.18035e-08	5.14779e-07	chr15	6525659	6525777	chr15:6525659-6525777	119	*	Distal Intergenic	Distal Intergenic	15	6459847	6493616	33770	1	449818	NM_001005991	65812	ENSDARG00000044781	beta-secretase 2	1.37641	7.58715	2.37216	7.10641	0.833164	1.46298	1.54795	11.9048	3.74638	9.57346	4.92081	3.21725	bace2_65812	4.27388	5.36448
bace2	12252.1	8452.13	5621.25	15545.8	12331.5	1203.87	2449.89	1529.3	4907.71	1951.64	1261.46	6136.97	2.28952	0.425039	7.18035e-08	5.14779e-07	chr15	6531229	6531351	chr15:6531229-6531351	123	*	Distal Intergenic	Distal Intergenic	15	6459847	6493616	33770	1	449818	NM_001005991	71382	ENSDARG00000044781	beta-secretase 2	1.37641	7.58715	10.6747	7.10641	4.16582	10.2409	7.73974	5.10206	3.74638	9.27429	7.38122	11.2604	bace2_71382	6.74915	7.91556
bace2	12252.1	8452.13	5621.25	15545.8	12331.5	1203.87	2449.89	1529.3	4907.71	1951.64	1261.46	6136.97	2.28952	0.425039	7.18035e-08	5.14779e-07	chr15	6545076	6545195	chr15:6545076-6545195	120	*	Distal Intergenic	Distal Intergenic	15	6459847	6493616	33770	1	449818	NM_001005991	85229	ENSDARG00000044781	beta-secretase 2	17.8934	22.7614	9.48864	5.076	3.33266	1.46298	1.54795	1.70069	56.1957	2.99171	22.1436	27.3466	bace2_85229	7.90797	27.1694
bco1	32.4053	760.381	125.618	823.471	184.042	463.743	406.849	296.565	859.57	184.117	363.389	409.105	-0.15573	0.681043	0.81913	0.873281	chr7	65260587	65260930	chr7:65260587-65260930	344	*	Distal Intergenic	Distal Intergenic	7	65272470	65290474	18005	1	84039	NM_001328495	-11540	ENSDARG00000104256	beta-carotene oxygenase 1	26.1518	41.1874	16.6051	3.0456	19.1628	10.2409	20.1233	17.0069	18.7319	6.88093	8.20135	20.9121	bco1_-11540	19.1905	13.6816
bco1	32.4053	760.381	125.618	823.471	184.042	463.743	406.849	296.565	859.57	184.117	363.389	409.105	-0.15573	0.681043	0.81913	0.873281	chr7	65261420	65261712	chr7:65261420-65261712	293	*	Distal Intergenic	Distal Intergenic	7	65272470	65290474	18005	1	84039	NM_001328495	-10758	ENSDARG00000104256	beta-carotene oxygenase 1	26.1518	3.25164	10.6747	5.076	5.83215	4.38895	1.54795	13.6055	18.7319	12.8643	13.9423	14.4776	bco1_-10758	8.81609	15.004
bco1	32.4053	760.381	125.618	823.471	184.042	463.743	406.849	296.565	859.57	184.117	363.389	409.105	-0.15573	0.681043	0.81913	0.873281	chr7	65264001	65264337	chr7:65264001-65264337	337	*	Distal Intergenic	Distal Intergenic	7	65272470	65290474	18005	1	84039	NM_001328495	-8133	ENSDARG00000104256	beta-carotene oxygenase 1	38.5395	43.3551	102.003	29.4408	26.6613	33.6487	20.1233	35.7144	17.4831	9.27429	6.56108	4.82587	bco1_-8133	41.1858	9.53609
bco1	32.4053	760.381	125.618	823.471	184.042	463.743	406.849	296.565	859.57	184.117	363.389	409.105	-0.15573	0.681043	0.81913	0.873281	chr7	65272410	65272551	chr7:65272410-65272551	142	*	Promoter (<=1kb)	Promoter	7	65272470	65290474	18005	1	84039	NM_001328495	0	ENSDARG00000104256	beta-carotene oxygenase 1	9.63489	8.67103	14.233	1.0152	7.49848	10.2409	6.19179	15.3062	4.99517	5.0859	4.92081	3.21725	bco1_0	9.09893	4.55478
bco1	32.4053	760.381	125.618	823.471	184.042	463.743	406.849	296.565	859.57	184.117	363.389	409.105	-0.15573	0.681043	0.81913	0.873281	chr7	65272587	65272744	chr7:65272587-65272744	158	*	Promoter (<=1kb)	Promoter	7	65272470	65290474	18005	1	84039	NM_001328495	117	ENSDARG00000104256	beta-carotene oxygenase 1	8.25847	1.08388	3.55824	1.0152	6.66531	4.38895	6.19179	6.80275	4.99517	5.38507	1.64027	4.82587	bco1_117	4.74558	4.2116
bco1	32.4053	760.381	125.618	823.471	184.042	463.743	406.849	296.565	859.57	184.117	363.389	409.105	-0.15573	0.681043	0.81913	0.873281	chr7	65280010	65280169	chr7:65280010-65280169	160	*	Intron (NM_001328495/84039, intron 4 of 10)	Intron	7	65272470	65290474	18005	1	84039	NM_001328495	7540	ENSDARG00000104256	beta-carotene oxygenase 1	1.37641	1.08388	1.18608	1.0152	9.1648	1.46298	1.54795	10.2041	9.99034	5.98341	1.64027	1.60862	bco1_7540	3.38018	4.80566
bhlhe40	6317.59	1141.71	5007.57	3173.33	12552.3	9184.51	7541	6276.56	8020.65	9820.06	7495.36	6957.33	-0.514792	0.475107	0.278574	0.390757	chr11	35760608	35760783	chr11:35760608-35760783	176	*	Promoter (2-3kb)	Promoter	11	35759652	35763257	3606	2	324413	NM_212679	2474	ENSDARG00000004060	basic helix-loop-helix family, member e40	68.8206	28.1808	61.6761	27.4104	29.9939	32.1857	29.411	13.6055	1.24879	7.77844	13.1222	1.60862	bhlhe40_2474	36.4105	5.9395
bhlhe40	6317.59	1141.71	5007.57	3173.33	12552.3	9184.51	7541	6276.56	8020.65	9820.06	7495.36	6957.33	-0.514792	0.475107	0.278574	0.390757	chr11	35760990	35761231	chr11:35760990-35761231	242	*	Promoter (2-3kb)	Promoter	11	35759652	35763257	3606	2	324413	NM_212679	2026	ENSDARG00000004060	basic helix-loop-helix family, member e40	64.6914	55.2778	39.1406	20.304	25.8281	57.0564	20.1233	35.7144	89.9131	23.3353	63.1504	49.8674	bhlhe40_2026	39.767	56.5665
bhlhe40	6317.59	1141.71	5007.57	3173.33	12552.3	9184.51	7541	6276.56	8020.65	9820.06	7495.36	6957.33	-0.514792	0.475107	0.278574	0.390757	chr11	35762441	35762587	chr11:35762441-35762587	147	*	Promoter (<=1kb)	Promoter	11	35759652	35763257	3606	2	324413	NM_212679	670	ENSDARG00000004060	basic helix-loop-helix family, member e40	44.0452	32.5164	33.2102	18.2736	23.3286	29.2597	12.3836	22.1089	43.7078	21.8395	35.2658	88.4744	bhlhe40_670	26.8908	47.3218
bhlhe40	6317.59	1141.71	5007.57	3173.33	12552.3	9184.51	7541	6276.56	8020.65	9820.06	7495.36	6957.33	-0.514792	0.475107	0.278574	0.390757	chr11	35763144	35763564	chr11:35763144-35763564	421	*	Promoter (<=1kb)	Promoter	11	35759652	35763257	3606	2	324413	NM_212679	0	ENSDARG00000004060	basic helix-loop-helix family, member e40	317.951	198.35	494.595	247.709	308.271	539.841	156.343	159.865	83.6691	85.5628	101.697	35.3897	bhlhe40_0	302.866	76.5796
bhlhe40	6317.59	1141.71	5007.57	3173.33	12552.3	9184.51	7541	6276.56	8020.65	9820.06	7495.36	6957.33	-0.514792	0.475107	0.278574	0.390757	chr11	35764447	35764818	chr11:35764447-35764818	372	*	Promoter (1-2kb)	Promoter	11	35759652	35763257	3606	2	324413	NM_212679	-1190	ENSDARG00000004060	basic helix-loop-helix family, member e40	114.242	111.639	253.821	132.991	205.792	308.69	140.863	124.15	47.4541	35.6013	39.3665	40.2156	bhlhe40_-1190	174.024	40.6594
bhlhe40	6317.59	1141.71	5007.57	3173.33	12552.3	9184.51	7541	6276.56	8020.65	9820.06	7495.36	6957.33	-0.514792	0.475107	0.278574	0.390757	chr11	35768660	35768778	chr11:35768660-35768778	119	*	Distal Intergenic	Distal Intergenic	11	35759652	35763257	3606	2	324413	NM_212679	-5403	ENSDARG00000004060	basic helix-loop-helix family, member e40	27.5282	29.2647	1.18608	3.0456	0.833164	1.46298	1.54795	1.70069	44.9566	18.5486	17.2228	43.4329	bhlhe40_-5403	8.32118	31.0402
bhlhe40	6317.59	1141.71	5007.57	3173.33	12552.3	9184.51	7541	6276.56	8020.65	9820.06	7495.36	6957.33	-0.514792	0.475107	0.278574	0.390757	chr11	35772566	35772952	chr11:35772566-35772952	387	*	Distal Intergenic	Distal Intergenic	11	35759652	35763257	3606	2	324413	NM_212679	-9309	ENSDARG00000004060	basic helix-loop-helix family, member e40	99.1017	63.9488	126.911	32.4864	20.8291	30.7227	35.6028	27.211	3.74638	11.0693	20.5034	9.65175	bhlhe40_-9309	54.6016	11.2427
bhlhe40	6317.59	1141.71	5007.57	3173.33	12552.3	9184.51	7541	6276.56	8020.65	9820.06	7495.36	6957.33	-0.514792	0.475107	0.278574	0.390757	chr11	35780601	35781082	chr11:35780601-35781082	482	*	Distal Intergenic	Distal Intergenic	11	35759652	35763257	3606	2	324413	NM_212679	-17344	ENSDARG00000004060	basic helix-loop-helix family, member e40	174.804	70.4521	241.96	105.581	160.801	178.484	92.8769	86.7351	4.99517	11.9668	18.043	8.04312	bhlhe40_-17344	138.962	10.762
bhlhe40	6317.59	1141.71	5007.57	3173.33	12552.3	9184.51	7541	6276.56	8020.65	9820.06	7495.36	6957.33	-0.514792	0.475107	0.278574	0.390757	chr11	35781121	35781284	chr11:35781121-35781284	164	*	Distal Intergenic	Distal Intergenic	11	35759652	35763257	3606	2	324413	NM_212679	-17864	ENSDARG00000004060	basic helix-loop-helix family, member e40	8.25847	30.3486	24.9077	13.1976	9.1648	21.9448	15.4795	13.6055	1.24879	3.59005	1.64027	4.82587	bhlhe40_-17864	17.1134	2.82625
bhlhe40	6317.59	1141.71	5007.57	3173.33	12552.3	9184.51	7541	6276.56	8020.65	9820.06	7495.36	6957.33	-0.514792	0.475107	0.278574	0.390757	chr11	35786926	35787245	chr11:35786926-35787245	320	*	Distal Intergenic	Distal Intergenic	11	35759652	35763257	3606	2	324413	NM_212679	-23669	ENSDARG00000004060	basic helix-loop-helix family, member e40	16.5169	5.41939	27.2798	5.076	20.8291	7.31492	4.64384	3.40138	1.24879	7.47927	4.92081	17.6949	bhlhe40_-23669	11.3102	7.83594
bhlhe40	6317.59	1141.71	5007.57	3173.33	12552.3	9184.51	7541	6276.56	8020.65	9820.06	7495.36	6957.33	-0.514792	0.475107	0.278574	0.390757	chr11	35790701	35790991	chr11:35790701-35790991	291	*	Distal Intergenic	Distal Intergenic	11	35759652	35763257	3606	2	324413	NM_212679	-27444	ENSDARG00000004060	basic helix-loop-helix family, member e40	11.0113	3.25164	5.9304	1.0152	2.49949	7.31492	6.19179	8.50344	6.24397	10.471	7.38122	1.60862	bhlhe40_-27444	5.71477	6.42619
bhlhe40	6317.59	1141.71	5007.57	3173.33	12552.3	9184.51	7541	6276.56	8020.65	9820.06	7495.36	6957.33	-0.514792	0.475107	0.278574	0.390757	chr11	35793978	35794154	chr11:35793978-35794154	177	*	Distal Intergenic	Distal Intergenic	11	35759652	35763257	3606	2	324413	NM_212679	-30721	ENSDARG00000004060	basic helix-loop-helix family, member e40	16.5169	11.9227	5.9304	18.2736	1.66633	1.46298	3.0959	5.10206	13.7367	5.0859	6.56108	22.5207	bhlhe40_-30721	7.99636	11.9761
bhlhe40	6317.59	1141.71	5007.57	3173.33	12552.3	9184.51	7541	6276.56	8020.65	9820.06	7495.36	6957.33	-0.514792	0.475107	0.278574	0.390757	chr11	35796960	35798273	chr11:35796960-35798273	1314	*	Distal Intergenic	Distal Intergenic	11	35759652	35763257	3606	2	324413	NM_212679	-33703	ENSDARG00000004060	basic helix-loop-helix family, member e40	118.371	112.723	130.469	70.0489	174.964	109.724	92.8769	45.9186	19.9807	30.8146	30.345	46.6501	bhlhe40_-33703	106.887	31.9476
bhlhe40	6317.59	1141.71	5007.57	3173.33	12552.3	9184.51	7541	6276.56	8020.65	9820.06	7495.36	6957.33	-0.514792	0.475107	0.278574	0.390757	chr11	35802947	35803143	chr11:35802947-35803143	197	*	Distal Intergenic	Distal Intergenic	11	35759652	35763257	3606	2	324413	NM_212679	-39690	ENSDARG00000004060	basic helix-loop-helix family, member e40	1.37641	14.0904	3.55824	1.0152	2.49949	4.38895	1.54795	5.10206	6.24397	10.7701	9.02149	14.4776	bhlhe40_-39690	4.19734	10.1283
bhlhe40	6317.59	1141.71	5007.57	3173.33	12552.3	9184.51	7541	6276.56	8020.65	9820.06	7495.36	6957.33	-0.514792	0.475107	0.278574	0.390757	chr11	35803741	35804051	chr11:35803741-35804051	311	*	Distal Intergenic	Distal Intergenic	11	35759652	35763257	3606	2	324413	NM_212679	-40484	ENSDARG00000004060	basic helix-loop-helix family, member e40	1.37641	9.75491	8.30256	10.152	8.33164	16.0928	6.19179	10.2041	12.4879	13.7619	7.38122	11.2604	bhlhe40_-40484	8.80078	11.2228
bhlhe40	6317.59	1141.71	5007.57	3173.33	12552.3	9184.51	7541	6276.56	8020.65	9820.06	7495.36	6957.33	-0.514792	0.475107	0.278574	0.390757	chr11	35804077	35804293	chr11:35804077-35804293	217	*	Distal Intergenic	Distal Intergenic	11	35759652	35763257	3606	2	324413	NM_212679	-40820	ENSDARG00000004060	basic helix-loop-helix family, member e40	9.63489	5.41939	5.9304	1.0152	7.49848	5.85194	10.8356	1.70069	16.2343	10.7701	0.820135	24.1294	bhlhe40_-40820	5.98583	12.9885
bhlhe40	6317.59	1141.71	5007.57	3173.33	12552.3	9184.51	7541	6276.56	8020.65	9820.06	7495.36	6957.33	-0.514792	0.475107	0.278574	0.390757	chr11	35809719	35810066	chr11:35809719-35810066	348	*	Distal Intergenic	Distal Intergenic	11	35759652	35763257	3606	2	324413	NM_212679	-46462	ENSDARG00000004060	basic helix-loop-helix family, member e40	11.0113	24.9292	20.1634	3.0456	2.49949	13.1669	20.1233	15.3062	3.74638	8.67595	7.38122	8.04312	bhlhe40_-46462	13.7807	6.96167
bhlhe40	6317.59	1141.71	5007.57	3173.33	12552.3	9184.51	7541	6276.56	8020.65	9820.06	7495.36	6957.33	-0.514792	0.475107	0.278574	0.390757	chr11	35817502	35817849	chr11:35817502-35817849	348	*	Distal Intergenic	Distal Intergenic	11	35759652	35763257	3606	2	324413	NM_212679	-54245	ENSDARG00000004060	basic helix-loop-helix family, member e40	6.88206	22.7614	5.9304	15.228	14.997	36.5746	10.8356	15.3062	6.24397	10.7701	17.2228	16.0862	bhlhe40_-54245	16.0644	12.5808
bhlhe40	6317.59	1141.71	5007.57	3173.33	12552.3	9184.51	7541	6276.56	8020.65	9820.06	7495.36	6957.33	-0.514792	0.475107	0.278574	0.390757	chr11	35821142	35821303	chr11:35821142-35821303	162	*	Distal Intergenic	Distal Intergenic	11	35759652	35763257	3606	2	324413	NM_212679	-57885	ENSDARG00000004060	basic helix-loop-helix family, member e40	4.12924	1.08388	1.18608	1.0152	0.833164	1.46298	4.64384	1.70069	11.2391	7.1801	4.10068	4.82587	bhlhe40_-57885	2.00688	6.83645
bhlhe40	6317.59	1141.71	5007.57	3173.33	12552.3	9184.51	7541	6276.56	8020.65	9820.06	7495.36	6957.33	-0.514792	0.475107	0.278574	0.390757	chr11	35821424	35821712	chr11:35821424-35821712	289	*	Distal Intergenic	Distal Intergenic	11	35759652	35763257	3606	2	324413	NM_212679	-58167	ENSDARG00000004060	basic helix-loop-helix family, member e40	6.88206	10.8388	23.7216	4.0608	0.833164	13.1669	10.8356	17.0069	11.2391	13.7619	17.2228	4.82587	bhlhe40_-58167	10.9182	11.7624
bhlhe40	6317.59	1141.71	5007.57	3173.33	12552.3	9184.51	7541	6276.56	8020.65	9820.06	7495.36	6957.33	-0.514792	0.475107	0.278574	0.390757	chr11	35822972	35823241	chr11:35822972-35823241	270	*	Distal Intergenic	Distal Intergenic	11	35759652	35763257	3606	2	324413	NM_212679	-59715	ENSDARG00000004060	basic helix-loop-helix family, member e40	13.7641	5.41939	27.2798	15.228	7.49848	2.92597	41.7946	27.211	14.9855	6.58176	7.38122	8.04312	bhlhe40_-59715	17.6402	9.2479
bhlhe40	6317.59	1141.71	5007.57	3173.33	12552.3	9184.51	7541	6276.56	8020.65	9820.06	7495.36	6957.33	-0.514792	0.475107	0.278574	0.390757	chr11	35835093	35835383	chr11:35835093-35835383	291	*	Distal Intergenic	Distal Intergenic	11	35759652	35763257	3606	2	324413	NM_212679	-71836	ENSDARG00000004060	basic helix-loop-helix family, member e40	26.1518	7.58715	10.6747	1.0152	4.16582	10.2409	7.73974	18.7076	16.2343	4.18839	7.38122	11.2604	bhlhe40_-71836	10.7854	9.76607
bhlhe40	6317.59	1141.71	5007.57	3173.33	12552.3	9184.51	7541	6276.56	8020.65	9820.06	7495.36	6957.33	-0.514792	0.475107	0.278574	0.390757	chr11	35839193	35839476	chr11:35839193-35839476	284	*	Distal Intergenic	Distal Intergenic	11	35759652	35763257	3606	2	324413	NM_212679	-75936	ENSDARG00000004060	basic helix-loop-helix family, member e40	1.37641	3.25164	1.18608	1.0152	0.833164	7.31492	4.64384	17.0069	1.24879	6.58176	4.10068	6.4345	bhlhe40_-75936	4.57852	4.59143
bhlhe40	6317.59	1141.71	5007.57	3173.33	12552.3	9184.51	7541	6276.56	8020.65	9820.06	7495.36	6957.33	-0.514792	0.475107	0.278574	0.390757	chr11	35842302	35842605	chr11:35842302-35842605	304	*	Distal Intergenic	Distal Intergenic	11	35759652	35763257	3606	2	324413	NM_212679	-79045	ENSDARG00000004060	basic helix-loop-helix family, member e40	1.37641	9.75491	1.18608	3.0456	0.833164	4.38895	1.54795	5.10206	8.74155	8.07761	0.820135	1.60862	bhlhe40_-79045	3.40439	4.81198
bhlhe40	6317.59	1141.71	5007.57	3173.33	12552.3	9184.51	7541	6276.56	8020.65	9820.06	7495.36	6957.33	-0.514792	0.475107	0.278574	0.390757	chr11	35847220	35847468	chr11:35847220-35847468	249	*	Distal Intergenic	Distal Intergenic	11	35759652	35763257	3606	2	324413	NM_212679	-83963	ENSDARG00000004060	basic helix-loop-helix family, member e40	19.2698	20.5937	39.1406	11.1672	15.8301	23.4078	21.6713	25.5103	16.2343	18.5486	19.6832	17.6949	bhlhe40_-83963	22.0738	18.0403
bhlhe40	6317.59	1141.71	5007.57	3173.33	12552.3	9184.51	7541	6276.56	8020.65	9820.06	7495.36	6957.33	-0.514792	0.475107	0.278574	0.390757	chr11	35848906	35849350	chr11:35848906-35849350	445	*	Distal Intergenic	Distal Intergenic	11	35759652	35763257	3606	2	324413	NM_212679	-85649	ENSDARG00000004060	basic helix-loop-helix family, member e40	192.698	72.6199	243.146	53.8056	69.1526	150.687	140.863	93.5378	39.9614	48.1665	30.345	36.9984	bhlhe40_-85649	127.064	38.8678
bhlhe40	6317.59	1141.71	5007.57	3173.33	12552.3	9184.51	7541	6276.56	8020.65	9820.06	7495.36	6957.33	-0.514792	0.475107	0.278574	0.390757	chr11	35850627	35850946	chr11:35850627-35850946	320	*	Distal Intergenic	Distal Intergenic	11	35759652	35763257	3606	2	324413	NM_212679	-87370	ENSDARG00000004060	basic helix-loop-helix family, member e40	37.1631	14.0904	40.3267	1.0152	14.997	19.0188	26.3151	18.7076	17.4831	14.6594	17.2228	14.4776	bhlhe40_-87370	21.4542	15.9607
bhlhe40	6317.59	1141.71	5007.57	3173.33	12552.3	9184.51	7541	6276.56	8020.65	9820.06	7495.36	6957.33	-0.514792	0.475107	0.278574	0.390757	chr11	35854667	35855038	chr11:35854667-35855038	372	*	Distal Intergenic	Distal Intergenic	11	35759652	35763257	3606	2	324413	NM_212679	-91410	ENSDARG00000004060	basic helix-loop-helix family, member e40	39.916	43.3551	37.9545	13.1976	26.6613	23.4078	17.0274	44.2179	21.2295	9.27429	15.5826	17.6949	bhlhe40_-91410	30.7172	15.9453
bhlhe40	6317.59	1141.71	5007.57	3173.33	12552.3	9184.51	7541	6276.56	8020.65	9820.06	7495.36	6957.33	-0.514792	0.475107	0.278574	0.390757	chr11	35859892	35860264	chr11:35859892-35860264	373	*	Distal Intergenic	Distal Intergenic	11	35759652	35763257	3606	2	324413	NM_212679	-96635	ENSDARG00000004060	basic helix-loop-helix family, member e40	1.37641	2.16776	3.55824	1.0152	4.16582	4.38895	3.0959	6.80275	8.74155	11.6677	11.4819	16.0862	bhlhe40_-96635	3.32138	11.9943
bhlhe40	6317.59	1141.71	5007.57	3173.33	12552.3	9184.51	7541	6276.56	8020.65	9820.06	7495.36	6957.33	-0.514792	0.475107	0.278574	0.390757	chr11	35863409	35863824	chr11:35863409-35863824	416	*	Distal Intergenic	Distal Intergenic	11	35759652	35763257	3606	2	324413	NM_212679	-100152	ENSDARG00000004060	basic helix-loop-helix family, member e40	229.861	162.582	498.153	222.329	164.966	465.229	233.74	130.953	17.4831	19.7453	13.1222	43.4329	bhlhe40_-100152	263.477	23.4458
bhlhe40	6317.59	1141.71	5007.57	3173.33	12552.3	9184.51	7541	6276.56	8020.65	9820.06	7495.36	6957.33	-0.514792	0.475107	0.278574	0.390757	chr11	35868139	35868604	chr11:35868139-35868604	466	*	Distal Intergenic	Distal Intergenic	11	35759652	35763257	3606	2	324413	NM_212679	-104882	ENSDARG00000004060	basic helix-loop-helix family, member e40	39.916	43.3551	58.1179	29.4408	80.8169	86.3161	29.411	52.7213	19.9807	14.3602	8.20135	11.2604	bhlhe40_-104882	52.5119	13.4507
bhlhe40	6317.59	1141.71	5007.57	3173.33	12552.3	9184.51	7541	6276.56	8020.65	9820.06	7495.36	6957.33	-0.514792	0.475107	0.278574	0.390757	chr11	35873602	35873769	chr11:35873602-35873769	168	*	Distal Intergenic	Distal Intergenic	11	35759652	35763257	3606	2	324413	NM_212679	-110345	ENSDARG00000004060	basic helix-loop-helix family, member e40	1.37641	1.08388	1.18608	1.0152	3.33266	4.38895	7.73974	1.70069	2.49759	6.28258	9.84162	1.60862	bhlhe40_-110345	2.72795	5.0576
bhlhe40	6317.59	1141.71	5007.57	3173.33	12552.3	9184.51	7541	6276.56	8020.65	9820.06	7495.36	6957.33	-0.514792	0.475107	0.278574	0.390757	chr11	35875105	35875472	chr11:35875105-35875472	368	*	Distal Intergenic	Distal Intergenic	11	35759652	35763257	3606	2	324413	NM_212679	-111848	ENSDARG00000004060	basic helix-loop-helix family, member e40	34.4103	22.7614	129.283	49.7448	53.3225	96.557	30.959	49.3199	24.9759	28.7204	36.0859	14.4776	bhlhe40_-111848	58.2947	26.065
bhlhe40	6317.59	1141.71	5007.57	3173.33	12552.3	9184.51	7541	6276.56	8020.65	9820.06	7495.36	6957.33	-0.514792	0.475107	0.278574	0.390757	chr11	35882445	35882729	chr11:35882445-35882729	285	*	Distal Intergenic	Distal Intergenic	11	35759652	35763257	3606	2	324413	NM_212679	-119188	ENSDARG00000004060	basic helix-loop-helix family, member e40	1.37641	1.08388	1.18608	1.0152	1.66633	1.46298	7.73974	1.70069	4.99517	9.57346	13.1222	8.04312	bhlhe40_-119188	2.15391	8.93348
bhlhe40	6317.59	1141.71	5007.57	3173.33	12552.3	9184.51	7541	6276.56	8020.65	9820.06	7495.36	6957.33	-0.514792	0.475107	0.278574	0.390757	chr11	35885192	35885591	chr11:35885192-35885591	400	*	Distal Intergenic	Distal Intergenic	11	35759652	35763257	3606	2	324413	NM_212679	-121935	ENSDARG00000004060	basic helix-loop-helix family, member e40	83.9612	65.0327	84.2116	39.5928	42.4914	30.7227	26.3151	51.0206	31.2198	17.0527	12.302	40.2156	bhlhe40_-121935	52.9185	25.1975
bhlhe40	6317.59	1141.71	5007.57	3173.33	12552.3	9184.51	7541	6276.56	8020.65	9820.06	7495.36	6957.33	-0.514792	0.475107	0.278574	0.390757	chr11	35891247	35891945	chr11:35891247-35891945	699	*	Distal Intergenic	Distal Intergenic	11	35759652	35763257	3606	2	324413	NM_212679	-127990	ENSDARG00000004060	basic helix-loop-helix family, member e40	459.722	231.95	660.646	339.077	504.897	517.897	243.028	193.878	59.9421	45.1748	63.9705	73.9967	bhlhe40_-127990	393.887	60.771
bhlhe41	3141.87	3389.49	4229.15	2506.51	3256.23	1574.6	2613.73	2237.52	2350.61	2056.22	2716.24	2733.83	0.549223	0.215891	0.0109597	0.0269584	chr18	16125651	16125840	chr18:16125651-16125840	190	*	Promoter (<=1kb)	Promoter	18	16125925	16128588	2664	1	563771	NM_001039107	-85	ENSDARG00000041691	basic helix-loop-helix family, member e41	1.37641	1.08388	1.18608	33.5016	37.4924	1.46298	41.7946	1.70069	8.74155	0.299171	0.820135	1.60862	bhlhe41_-85	14.9498	2.86737
bmp2b	12.242	56.0999	7.55083	4.76782	0.657293	384.017	142.947	251.195	284.522	269.547	354.825	160.761	-4.11663	0.725312	1.38147e-08	1.09481e-07	chr20	45837063	45837261	chr20:45837063-45837261	199	*	Distal Intergenic	Distal Intergenic	20	45893152	45899149	5998	1	30632	NM_131360	-55891	ENSDARG00000041430	bone morphogenetic protein 2b	1.37641	9.75491	1.18608	7.10641	13.3306	4.38895	1.54795	1.70069	9.99034	5.38507	5.74095	1.60862	bmp2b_-55891	5.049	5.68125
bmp2b	12.242	56.0999	7.55083	4.76782	0.657293	384.017	142.947	251.195	284.522	269.547	354.825	160.761	-4.11663	0.725312	1.38147e-08	1.09481e-07	chr20	45841088	45841378	chr20:45841088-45841378	291	*	Distal Intergenic	Distal Intergenic	20	45893152	45899149	5998	1	30632	NM_131360	-51774	ENSDARG00000041430	bone morphogenetic protein 2b	4.12924	1.08388	5.9304	3.0456	1.66633	1.46298	7.73974	1.70069	11.2391	6.58176	4.10068	27.3466	bmp2b_-51774	3.34486	12.317
bmp2b	12.242	56.0999	7.55083	4.76782	0.657293	384.017	142.947	251.195	284.522	269.547	354.825	160.761	-4.11663	0.725312	1.38147e-08	1.09481e-07	chr20	45844858	45845048	chr20:45844858-45845048	191	*	Distal Intergenic	Distal Intergenic	20	45893152	45899149	5998	1	30632	NM_131360	-48104	ENSDARG00000041430	bone morphogenetic protein 2b	9.63489	14.0904	1.18608	8.12161	4.16582	1.46298	1.54795	1.70069	2.49759	4.78673	5.74095	8.04312	bmp2b_-48104	5.2388	5.2671
bmp4	0	6.82296	2.05932	0.681117	0.657293	34.5482	101.162	68.6084	105.645	47.1339	173.742	49.1873	-5.46091	0.762417	7.91401e-13	1.05991e-11	chr17	50441174	50441294	chr17:50441174-50441294	121	*	Distal Intergenic	Distal Intergenic	17	50564103	50586132	22030	1	30612	NM_131342	-122809	ENSDARG00000019995	bone morphogenetic protein 4	28.9047	42.2713	27.2798	33.5016	52.4893	48.2785	38.6987	52.7213	46.2053	41.5847	48.388	85.2571	bmp4_-122809	40.5182	55.3588
bmp4	0	6.82296	2.05932	0.681117	0.657293	34.5482	101.162	68.6084	105.645	47.1339	173.742	49.1873	-5.46091	0.762417	7.91401e-13	1.05991e-11	chr17	50443368	50443495	chr17:50443368-50443495	128	*	Distal Intergenic	Distal Intergenic	17	50564103	50586132	22030	1	30612	NM_131342	-120608	ENSDARG00000019995	bone morphogenetic protein 4	9.63489	24.9292	8.30256	11.1672	20.8291	16.0928	17.0274	18.7076	16.2343	18.8478	10.6618	11.2604	bmp4_-120608	15.8363	14.251
bmp4	0	6.82296	2.05932	0.681117	0.657293	34.5482	101.162	68.6084	105.645	47.1339	173.742	49.1873	-5.46091	0.762417	7.91401e-13	1.05991e-11	chr17	50447954	50448125	chr17:50447954-50448125	172	*	Distal Intergenic	Distal Intergenic	17	50564103	50586132	22030	1	30612	NM_131342	-115978	ENSDARG00000019995	bone morphogenetic protein 4	15.1405	5.41939	4.74432	3.0456	3.33266	1.46298	7.73974	5.10206	2.49759	8.67595	4.10068	12.869	bmp4_-115978	5.74841	7.0358
bmp4	0	6.82296	2.05932	0.681117	0.657293	34.5482	101.162	68.6084	105.645	47.1339	173.742	49.1873	-5.46091	0.762417	7.91401e-13	1.05991e-11	chr17	50450591	50450714	chr17:50450591-50450714	124	*	Distal Intergenic	Distal Intergenic	17	50564103	50586132	22030	1	30612	NM_131342	-113389	ENSDARG00000019995	bone morphogenetic protein 4	1.37641	7.58715	2.37216	1.0152	9.99797	1.46298	4.64384	3.40138	3.74638	5.68424	5.74095	14.4776	bmp4_-113389	3.98214	7.4123
bmp4	0	6.82296	2.05932	0.681117	0.657293	34.5482	101.162	68.6084	105.645	47.1339	173.742	49.1873	-5.46091	0.762417	7.91401e-13	1.05991e-11	chr17	50452746	50452884	chr17:50452746-50452884	139	*	Distal Intergenic	Distal Intergenic	17	50564103	50586132	22030	1	30612	NM_131342	-111219	ENSDARG00000019995	bone morphogenetic protein 4	1.37641	1.08388	2.37216	4.0608	0.833164	1.46298	1.54795	6.80275	16.2343	6.28258	14.7624	8.04312	bmp4_-111219	2.44251	11.3306
bmp4	0	6.82296	2.05932	0.681117	0.657293	34.5482	101.162	68.6084	105.645	47.1339	173.742	49.1873	-5.46091	0.762417	7.91401e-13	1.05991e-11	chr17	50456438	50456669	chr17:50456438-50456669	232	*	Distal Intergenic	Distal Intergenic	17	50564103	50586132	22030	1	30612	NM_131342	-107434	ENSDARG00000019995	bone morphogenetic protein 4	170.675	121.394	193.331	250.755	70.8189	158.002	97.5207	71.4289	43.7078	38.593	35.2658	27.3466	bmp4_-107434	141.741	36.2283
bmp4	0	6.82296	2.05932	0.681117	0.657293	34.5482	101.162	68.6084	105.645	47.1339	173.742	49.1873	-5.46091	0.762417	7.91401e-13	1.05991e-11	chr17	50466075	50466227	chr17:50466075-50466227	153	*	Distal Intergenic	Distal Intergenic	17	50564103	50586132	22030	1	30612	NM_131342	-97876	ENSDARG00000019995	bone morphogenetic protein 4	1.37641	1.08388	1.18608	9.13681	9.1648	19.0188	10.8356	1.70069	1.24879	1.19668	0.820135	1.60862	bmp4_-97876	6.68789	1.21856
bmp4	0	6.82296	2.05932	0.681117	0.657293	34.5482	101.162	68.6084	105.645	47.1339	173.742	49.1873	-5.46091	0.762417	7.91401e-13	1.05991e-11	chr17	50474586	50474762	chr17:50474586-50474762	177	*	Distal Intergenic	Distal Intergenic	17	50564103	50586132	22030	1	30612	NM_131342	-89341	ENSDARG00000019995	bone morphogenetic protein 4	1.37641	3.25164	1.18608	19.2888	4.16582	1.46298	3.0959	5.10206	6.24397	4.78673	4.10068	4.82587	bmp4_-89341	4.86621	4.98931
bmp4	0	6.82296	2.05932	0.681117	0.657293	34.5482	101.162	68.6084	105.645	47.1339	173.742	49.1873	-5.46091	0.762417	7.91401e-13	1.05991e-11	chr17	50483621	50484106	chr17:50483621-50484106	486	*	Distal Intergenic	Distal Intergenic	17	50564103	50586132	22030	1	30612	NM_131342	-79997	ENSDARG00000019995	bone morphogenetic protein 4	4.12924	7.58715	3.55824	17.2584	3.33266	2.92597	23.2192	6.80275	28.7222	14.6594	16.4027	6.4345	bmp4_-79997	8.6017	16.5547
bmp4	0	6.82296	2.05932	0.681117	0.657293	34.5482	101.162	68.6084	105.645	47.1339	173.742	49.1873	-5.46091	0.762417	7.91401e-13	1.05991e-11	chr17	50490361	50490535	chr17:50490361-50490535	175	*	Distal Intergenic	Distal Intergenic	17	50564103	50586132	22030	1	30612	NM_131342	-73568	ENSDARG00000019995	bone morphogenetic protein 4	1.37641	5.41939	3.55824	20.304	5.83215	10.2409	4.64384	1.70069	11.2391	1.49585	1.64027	4.82587	bmp4_-73568	6.63445	4.80028
bmp4	0	6.82296	2.05932	0.681117	0.657293	34.5482	101.162	68.6084	105.645	47.1339	173.742	49.1873	-5.46091	0.762417	7.91401e-13	1.05991e-11	chr17	50493470	50493616	chr17:50493470-50493616	147	*	Distal Intergenic	Distal Intergenic	17	50564103	50586132	22030	1	30612	NM_131342	-70487	ENSDARG00000019995	bone morphogenetic protein 4	12.3877	7.58715	1.18608	3.0456	7.49848	4.38895	15.4795	10.2041	1.24879	5.68424	4.10068	1.60862	bmp4_-70487	7.7222	3.16058
bmp4	0	6.82296	2.05932	0.681117	0.657293	34.5482	101.162	68.6084	105.645	47.1339	173.742	49.1873	-5.46091	0.762417	7.91401e-13	1.05991e-11	chr17	50499306	50499673	chr17:50499306-50499673	368	*	Distal Intergenic	Distal Intergenic	17	50564103	50586132	22030	1	30612	NM_131342	-64430	ENSDARG00000019995	bone morphogenetic protein 4	6.88206	16.2582	3.55824	9.13681	14.997	8.77791	10.8356	20.4083	63.6884	12.5652	5.74095	25.738	bmp4_-64430	11.3568	26.9331
bmp4	0	6.82296	2.05932	0.681117	0.657293	34.5482	101.162	68.6084	105.645	47.1339	173.742	49.1873	-5.46091	0.762417	7.91401e-13	1.05991e-11	chr17	50503527	50503760	chr17:50503527-50503760	234	*	Distal Intergenic	Distal Intergenic	17	50564103	50586132	22030	1	30612	NM_131342	-60343	ENSDARG00000019995	bone morphogenetic protein 4	4.12924	5.41939	1.18608	11.1672	4.99898	7.31492	1.54795	1.70069	8.74155	8.07761	5.74095	14.4776	bmp4_-60343	4.68306	9.25943
bmp4	0	6.82296	2.05932	0.681117	0.657293	34.5482	101.162	68.6084	105.645	47.1339	173.742	49.1873	-5.46091	0.762417	7.91401e-13	1.05991e-11	chr17	50505226	50505405	chr17:50505226-50505405	180	*	Distal Intergenic	Distal Intergenic	17	50564103	50586132	22030	1	30612	NM_131342	-58698	ENSDARG00000019995	bone morphogenetic protein 4	1.37641	1.08388	2.37216	12.1824	2.49949	4.38895	1.54795	3.40138	3.74638	7.47927	4.92081	1.60862	bmp4_-58698	3.60658	4.43877
bmp4	0	6.82296	2.05932	0.681117	0.657293	34.5482	101.162	68.6084	105.645	47.1339	173.742	49.1873	-5.46091	0.762417	7.91401e-13	1.05991e-11	chr17	50516512	50516732	chr17:50516512-50516732	221	*	Distal Intergenic	Distal Intergenic	17	50564103	50586132	22030	1	30612	NM_131342	-47371	ENSDARG00000019995	bone morphogenetic protein 4	17.8934	1.08388	5.9304	9.13681	1.66633	4.38895	1.54795	1.70069	2.49759	8.07761	10.6618	4.82587	bmp4_-47371	5.41855	6.51571
bmp4	0	6.82296	2.05932	0.681117	0.657293	34.5482	101.162	68.6084	105.645	47.1339	173.742	49.1873	-5.46091	0.762417	7.91401e-13	1.05991e-11	chr17	50526272	50526687	chr17:50526272-50526687	416	*	Distal Intergenic	Distal Intergenic	17	50564103	50586132	22030	1	30612	NM_131342	-37416	ENSDARG00000019995	bone morphogenetic protein 4	9.63489	11.9227	2.37216	14.2128	14.1638	8.77791	7.73974	10.2041	31.2198	15.5569	12.302	3.21725	bmp4_-37416	9.87851	15.574
bmp4	0	6.82296	2.05932	0.681117	0.657293	34.5482	101.162	68.6084	105.645	47.1339	173.742	49.1873	-5.46091	0.762417	7.91401e-13	1.05991e-11	chr17	50529662	50529811	chr17:50529662-50529811	150	*	Distal Intergenic	Distal Intergenic	17	50564103	50586132	22030	1	30612	NM_131342	-34292	ENSDARG00000019995	bone morphogenetic protein 4	1.37641	3.25164	4.74432	3.0456	0.833164	1.46298	4.64384	1.70069	1.24879	6.28258	12.302	1.60862	bmp4_-34292	2.63233	5.36051
bmp4	0	6.82296	2.05932	0.681117	0.657293	34.5482	101.162	68.6084	105.645	47.1339	173.742	49.1873	-5.46091	0.762417	7.91401e-13	1.05991e-11	chr17	50531634	50531762	chr17:50531634-50531762	129	*	Distal Intergenic	Distal Intergenic	17	50564103	50586132	22030	1	30612	NM_131342	-32341	ENSDARG00000019995	bone morphogenetic protein 4	1.37641	5.41939	1.18608	2.0304	2.49949	1.46298	1.54795	15.3062	13.7367	4.48756	2.46041	3.21725	bmp4_-32341	3.85361	5.97548
bmp4	0	6.82296	2.05932	0.681117	0.657293	34.5482	101.162	68.6084	105.645	47.1339	173.742	49.1873	-5.46091	0.762417	7.91401e-13	1.05991e-11	chr17	50534488	50534656	chr17:50534488-50534656	169	*	Distal Intergenic	Distal Intergenic	17	50564103	50586132	22030	1	30612	NM_131342	-29447	ENSDARG00000019995	bone morphogenetic protein 4	4.12924	1.08388	1.18608	2.0304	0.833164	1.46298	1.54795	11.9048	7.49276	5.98341	9.02149	1.60862	bmp4_-29447	3.02231	6.02657
bmp4	0	6.82296	2.05932	0.681117	0.657293	34.5482	101.162	68.6084	105.645	47.1339	173.742	49.1873	-5.46091	0.762417	7.91401e-13	1.05991e-11	chr17	50537371	50537490	chr17:50537371-50537490	120	*	Distal Intergenic	Distal Intergenic	17	50564103	50586132	22030	1	30612	NM_131342	-26613	ENSDARG00000019995	bone morphogenetic protein 4	26.1518	16.2582	1.18608	1.0152	0.833164	1.46298	1.54795	1.70069	23.7271	5.68424	25.4242	40.2156	bmp4_-26613	6.26951	23.7628
bmp4	0	6.82296	2.05932	0.681117	0.657293	34.5482	101.162	68.6084	105.645	47.1339	173.742	49.1873	-5.46091	0.762417	7.91401e-13	1.05991e-11	chr17	50539844	50539976	chr17:50539844-50539976	133	*	Distal Intergenic	Distal Intergenic	17	50564103	50586132	22030	1	30612	NM_131342	-24127	ENSDARG00000019995	bone morphogenetic protein 4	1.37641	2.16776	1.18608	4.0608	1.66633	1.46298	6.19179	11.9048	3.74638	4.18839	2.46041	11.2604	bmp4_-24127	3.75212	5.41389
bmp4	0	6.82296	2.05932	0.681117	0.657293	34.5482	101.162	68.6084	105.645	47.1339	173.742	49.1873	-5.46091	0.762417	7.91401e-13	1.05991e-11	chr17	50548376	50548679	chr17:50548376-50548679	304	*	Distal Intergenic	Distal Intergenic	17	50564103	50586132	22030	1	30612	NM_131342	-15424	ENSDARG00000019995	bone morphogenetic protein 4	17.8934	15.1743	15.419	20.304	12.4975	11.7039	6.19179	1.70069	8.74155	4.78673	7.38122	12.869	bmp4_-15424	12.6106	8.44462
bmp4	0	6.82296	2.05932	0.681117	0.657293	34.5482	101.162	68.6084	105.645	47.1339	173.742	49.1873	-5.46091	0.762417	7.91401e-13	1.05991e-11	chr17	50552089	50552230	chr17:50552089-50552230	142	*	Distal Intergenic	Distal Intergenic	17	50564103	50586132	22030	1	30612	NM_131342	-11873	ENSDARG00000019995	bone morphogenetic protein 4	2.75282	3.25164	1.18608	2.0304	0.833164	11.7039	1.54795	11.9048	13.7367	9.57346	13.1222	1.60862	bmp4_-11873	4.40134	9.51024
bmp4	0	6.82296	2.05932	0.681117	0.657293	34.5482	101.162	68.6084	105.645	47.1339	173.742	49.1873	-5.46091	0.762417	7.91401e-13	1.05991e-11	chr17	50552252	50552398	chr17:50552252-50552398	147	*	Distal Intergenic	Distal Intergenic	17	50564103	50586132	22030	1	30612	NM_131342	-11705	ENSDARG00000019995	bone morphogenetic protein 4	1.37641	1.08388	2.37216	5.076	0.833164	8.77791	1.54795	8.50344	13.7367	8.07761	9.02149	1.60862	bmp4_-11705	3.69636	8.11111
bmp4	0	6.82296	2.05932	0.681117	0.657293	34.5482	101.162	68.6084	105.645	47.1339	173.742	49.1873	-5.46091	0.762417	7.91401e-13	1.05991e-11	chr17	50559075	50559222	chr17:50559075-50559222	148	*	Distal Intergenic	Distal Intergenic	17	50564103	50586132	22030	1	30612	NM_131342	-4881	ENSDARG00000019995	bone morphogenetic protein 4	8.25847	1.08388	1.18608	1.0152	3.33266	4.38895	3.0959	11.9048	4.99517	5.68424	4.10068	1.60862	bmp4_-4881	4.28324	4.09718
bmp4	0	6.82296	2.05932	0.681117	0.657293	34.5482	101.162	68.6084	105.645	47.1339	173.742	49.1873	-5.46091	0.762417	7.91401e-13	1.05991e-11	chr17	50562544	50562675	chr17:50562544-50562675	132	*	Promoter (1-2kb)	Promoter	17	50564103	50586132	22030	1	30612	NM_131342	-1428	ENSDARG00000019995	bone morphogenetic protein 4	1.37641	7.58715	1.18608	1.0152	5.83215	7.31492	9.28769	8.50344	16.2343	11.9668	18.043	30.5639	bmp4_-1428	5.26288	19.202
bmp4	0	6.82296	2.05932	0.681117	0.657293	34.5482	101.162	68.6084	105.645	47.1339	173.742	49.1873	-5.46091	0.762417	7.91401e-13	1.05991e-11	chr17	50563987	50564145	chr17:50563987-50564145	159	*	Promoter (<=1kb)	Promoter	17	50564103	50586132	22030	1	30612	NM_131342	0	ENSDARG00000019995	bone morphogenetic protein 4	11.0113	8.67103	16.6051	7.10641	2.49949	7.31492	4.64384	5.10206	8.74155	5.38507	9.84162	11.2604	bmp4_0	7.86927	8.80715
bmp4	0	6.82296	2.05932	0.681117	0.657293	34.5482	101.162	68.6084	105.645	47.1339	173.742	49.1873	-5.46091	0.762417	7.91401e-13	1.05991e-11	chr17	50574145	50574435	chr17:50574145-50574435	291	*	Exon (NM_131342/30612, exon 3 of 4)	Exon	17	50564103	50586132	22030	1	30612	NM_131342	10042	ENSDARG00000019995	bone morphogenetic protein 4	45.4216	24.9292	15.419	11.1672	6.66531	16.0928	9.28769	1.70069	48.7029	21.5403	45.9276	78.8226	bmp4_10042	16.3354	48.7483
bmp4	0	6.82296	2.05932	0.681117	0.657293	34.5482	101.162	68.6084	105.645	47.1339	173.742	49.1873	-5.46091	0.762417	7.91401e-13	1.05991e-11	chr17	50584114	50584719	chr17:50584114-50584719	606	*	3' UTR	3' UTR	17	50564103	50586132	22030	1	30612	NM_131342	20011	ENSDARG00000019995	bone morphogenetic protein 4	22.0226	18.4259	10.6747	18.2736	14.997	21.9448	7.73974	20.4083	12.4879	22.1386	21.3235	14.4776	bmp4_20011	16.8108	17.6069
bmp4	0	6.82296	2.05932	0.681117	0.657293	34.5482	101.162	68.6084	105.645	47.1339	173.742	49.1873	-5.46091	0.762417	7.91401e-13	1.05991e-11	chr17	50589237	50589488	chr17:50589237-50589488	252	*	Distal Intergenic	Distal Intergenic	17	50564103	50586132	22030	1	30612	NM_131342	25134	ENSDARG00000019995	bone morphogenetic protein 4	4.12924	3.25164	3.55824	18.2736	0.833164	1.46298	7.73974	3.40138	7.49276	8.07761	4.10068	3.21725	bmp4_25134	5.33125	5.72207
bmp4	0	6.82296	2.05932	0.681117	0.657293	34.5482	101.162	68.6084	105.645	47.1339	173.742	49.1873	-5.46091	0.762417	7.91401e-13	1.05991e-11	chr17	50603336	50603559	chr17:50603336-50603559	224	*	Distal Intergenic	Distal Intergenic	17	50564103	50586132	22030	1	30612	NM_131342	39233	ENSDARG00000019995	bone morphogenetic protein 4	9.63489	9.75491	1.18608	11.1672	2.49949	24.8707	4.64384	3.40138	1.24879	6.58176	5.74095	12.869	bmp4_39233	8.39482	6.61012
bmp4	0	6.82296	2.05932	0.681117	0.657293	34.5482	101.162	68.6084	105.645	47.1339	173.742	49.1873	-5.46091	0.762417	7.91401e-13	1.05991e-11	chr17	50606399	50606570	chr17:50606399-50606570	172	*	Distal Intergenic	Distal Intergenic	17	50564103	50586132	22030	1	30612	NM_131342	42296	ENSDARG00000019995	bone morphogenetic protein 4	1.37641	2.16776	1.18608	11.1672	3.33266	2.92597	6.19179	1.70069	4.99517	5.98341	5.74095	8.04312	bmp4_42296	3.75607	6.19066
bmp4	0	6.82296	2.05932	0.681117	0.657293	34.5482	101.162	68.6084	105.645	47.1339	173.742	49.1873	-5.46091	0.762417	7.91401e-13	1.05991e-11	chr17	50610933	50611093	chr17:50610933-50611093	161	*	Distal Intergenic	Distal Intergenic	17	50564103	50586132	22030	1	30612	NM_131342	46830	ENSDARG00000019995	bone morphogenetic protein 4	2.75282	1.08388	1.18608	1.0152	4.16582	1.46298	4.64384	13.6055	2.49759	4.78673	6.56108	6.4345	bmp4_46830	3.73952	5.06997
bmp4	0	6.82296	2.05932	0.681117	0.657293	34.5482	101.162	68.6084	105.645	47.1339	173.742	49.1873	-5.46091	0.762417	7.91401e-13	1.05991e-11	chr17	50613123	50613252	chr17:50613123-50613252	130	*	Distal Intergenic	Distal Intergenic	17	50564103	50586132	22030	1	30612	NM_131342	49020	ENSDARG00000019995	bone morphogenetic protein 4	1.37641	9.75491	1.18608	5.076	4.16582	4.38895	4.64384	1.70069	11.2391	10.471	3.28054	4.82587	bmp4_49020	4.03659	7.45413
bmp4	0	6.82296	2.05932	0.681117	0.657293	34.5482	101.162	68.6084	105.645	47.1339	173.742	49.1873	-5.46091	0.762417	7.91401e-13	1.05991e-11	chr17	50615278	50615505	chr17:50615278-50615505	228	*	Distal Intergenic	Distal Intergenic	17	50564103	50586132	22030	1	30612	NM_131342	51175	ENSDARG00000019995	bone morphogenetic protein 4	6.88206	1.08388	1.18608	1.0152	6.66531	2.92597	1.54795	1.70069	6.24397	7.77844	13.9423	9.65175	bmp4_51175	2.87589	9.40411
bmp4	0	6.82296	2.05932	0.681117	0.657293	34.5482	101.162	68.6084	105.645	47.1339	173.742	49.1873	-5.46091	0.762417	7.91401e-13	1.05991e-11	chr17	50620886	50621085	chr17:50620886-50621085	200	*	Distal Intergenic	Distal Intergenic	17	50564103	50586132	22030	1	30612	NM_131342	56783	ENSDARG00000019995	bone morphogenetic protein 4	9.63489	11.9227	5.9304	3.0456	15.8301	13.1669	10.8356	15.3062	13.7367	12.8643	9.02149	1.60862	bmp4_56783	10.709	9.30779
bmp4	0	6.82296	2.05932	0.681117	0.657293	34.5482	101.162	68.6084	105.645	47.1339	173.742	49.1873	-5.46091	0.762417	7.91401e-13	1.05991e-11	chr17	50623075	50623234	chr17:50623075-50623234	160	*	Distal Intergenic	Distal Intergenic	17	50564103	50586132	22030	1	30612	NM_131342	58972	ENSDARG00000019995	bone morphogenetic protein 4	1.37641	1.08388	7.11648	10.152	6.66531	1.46298	12.3836	3.40138	17.4831	4.78673	13.1222	11.2604	bmp4_58972	5.45525	11.6631
bmp4	0	6.82296	2.05932	0.681117	0.657293	34.5482	101.162	68.6084	105.645	47.1339	173.742	49.1873	-5.46091	0.762417	7.91401e-13	1.05991e-11	chr17	50630777	50630941	chr17:50630777-50630941	165	*	Distal Intergenic	Distal Intergenic	17	50564103	50586132	22030	1	30612	NM_131342	66674	ENSDARG00000019995	bone morphogenetic protein 4	1.37641	5.41939	2.37216	5.076	0.833164	1.46298	1.54795	11.9048	13.7367	7.47927	6.56108	1.60862	bmp4_66674	3.74911	7.34642
bmp4	0	6.82296	2.05932	0.681117	0.657293	34.5482	101.162	68.6084	105.645	47.1339	173.742	49.1873	-5.46091	0.762417	7.91401e-13	1.05991e-11	chr17	50631028	50631411	chr17:50631028-50631411	384	*	Distal Intergenic	Distal Intergenic	17	50564103	50586132	22030	1	30612	NM_131342	66925	ENSDARG00000019995	bone morphogenetic protein 4	9.63489	6.50327	1.18608	18.2736	2.49949	1.46298	9.28769	5.10206	6.24397	13.1635	13.9423	20.9121	bmp4_66925	6.74376	13.5655
bmp5	0	0	117.381	24.5202	31.5501	9.30145	0	44.2635	86.4372	4.4188	80.7532	36.2387	-0.113705	1.42777	0.936525	0.957605	chr13	1640821	1641141	chr13:1640821-1641141	321	*	Distal Intergenic	Distal Intergenic	13	1872769	1906735	33967	1	394026	NM_201051	-231628	ENSDARG00000101701	bone morphogenetic protein 5	1.37641	14.0904	17.7912	7.10641	11.6643	4.38895	10.8356	17.0069	11.2391	8.37678	7.38122	11.2604	bmp5_-231628	10.5325	9.56438
bmp5	0	0	117.381	24.5202	31.5501	9.30145	0	44.2635	86.4372	4.4188	80.7532	36.2387	-0.113705	1.42777	0.936525	0.957605	chr13	1641656	1641996	chr13:1641656-1641996	341	*	Distal Intergenic	Distal Intergenic	13	1872769	1906735	33967	1	394026	NM_201051	-230773	ENSDARG00000101701	bone morphogenetic protein 5	4.12924	9.75491	10.6747	17.2584	12.4975	4.38895	20.1233	1.70069	1.24879	13.4627	10.6618	8.04312	bmp5_-230773	10.066	8.35409
bmp5	0	0	117.381	24.5202	31.5501	9.30145	0	44.2635	86.4372	4.4188	80.7532	36.2387	-0.113705	1.42777	0.936525	0.957605	chr13	1643774	1644006	chr13:1643774-1644006	233	*	Distal Intergenic	Distal Intergenic	13	1872769	1906735	33967	1	394026	NM_201051	-228763	ENSDARG00000101701	bone morphogenetic protein 5	4.12924	5.41939	15.419	67.0033	23.3286	19.0188	4.64384	5.10206	2.49759	4.18839	4.10068	6.4345	bmp5_-228763	18.008	4.30529
bmp5	0	0	117.381	24.5202	31.5501	9.30145	0	44.2635	86.4372	4.4188	80.7532	36.2387	-0.113705	1.42777	0.936525	0.957605	chr13	1646082	1646276	chr13:1646082-1646276	195	*	Distal Intergenic	Distal Intergenic	13	1872769	1906735	33967	1	394026	NM_201051	-226493	ENSDARG00000101701	bone morphogenetic protein 5	6.88206	5.41939	2.37216	5.076	10.8311	13.1669	3.0959	1.70069	6.24397	8.67595	4.10068	4.82587	bmp5_-226493	6.06802	5.96162
bmp5	0	0	117.381	24.5202	31.5501	9.30145	0	44.2635	86.4372	4.4188	80.7532	36.2387	-0.113705	1.42777	0.936525	0.957605	chr13	1650606	1650794	chr13:1650606-1650794	189	*	Distal Intergenic	Distal Intergenic	13	1872769	1906735	33967	1	394026	NM_201051	-221975	ENSDARG00000101701	bone morphogenetic protein 5	26.1518	5.41939	4.74432	7.10641	4.16582	13.1669	12.3836	1.70069	26.2247	8.07761	18.043	30.5639	bmp5_-221975	9.35486	20.7273
bmp5	0	0	117.381	24.5202	31.5501	9.30145	0	44.2635	86.4372	4.4188	80.7532	36.2387	-0.113705	1.42777	0.936525	0.957605	chr13	1651617	1651955	chr13:1651617-1651955	339	*	Distal Intergenic	Distal Intergenic	13	1872769	1906735	33967	1	394026	NM_201051	-220814	ENSDARG00000101701	bone morphogenetic protein 5	9.63489	7.58715	39.1406	87.3073	39.1587	14.6298	47.9864	27.211	14.9855	6.58176	7.38122	4.82587	bmp5_-220814	34.082	8.44359
bmp5	0	0	117.381	24.5202	31.5501	9.30145	0	44.2635	86.4372	4.4188	80.7532	36.2387	-0.113705	1.42777	0.936525	0.957605	chr13	1655715	1655851	chr13:1655715-1655851	137	*	Distal Intergenic	Distal Intergenic	13	1872769	1906735	33967	1	394026	NM_201051	-216918	ENSDARG00000101701	bone morphogenetic protein 5	5.50565	4.33551	1.18608	3.0456	0.833164	14.6298	3.0959	1.70069	13.7367	2.39337	9.02149	17.6949	bmp5_-216918	4.29156	10.7116
bmp5	0	0	117.381	24.5202	31.5501	9.30145	0	44.2635	86.4372	4.4188	80.7532	36.2387	-0.113705	1.42777	0.936525	0.957605	chr13	1655857	1656041	chr13:1655857-1656041	185	*	Distal Intergenic	Distal Intergenic	13	1872769	1906735	33967	1	394026	NM_201051	-216728	ENSDARG00000101701	bone morphogenetic protein 5	5.50565	15.1743	3.55824	3.0456	6.66531	11.7039	1.54795	6.80275	11.2391	3.29088	9.84162	6.4345	bmp5_-216728	6.75046	7.70153
bmp5	0	0	117.381	24.5202	31.5501	9.30145	0	44.2635	86.4372	4.4188	80.7532	36.2387	-0.113705	1.42777	0.936525	0.957605	chr13	1659412	1659707	chr13:1659412-1659707	296	*	Distal Intergenic	Distal Intergenic	13	1872769	1906735	33967	1	394026	NM_201051	-213062	ENSDARG00000101701	bone morphogenetic protein 5	4.12924	7.58715	8.30256	14.2128	12.4975	16.0928	4.64384	1.70069	18.7319	10.1718	11.4819	35.3897	bmp5_-213062	8.64582	18.9438
bmp5	0	0	117.381	24.5202	31.5501	9.30145	0	44.2635	86.4372	4.4188	80.7532	36.2387	-0.113705	1.42777	0.936525	0.957605	chr13	1664494	1664880	chr13:1664494-1664880	387	*	Distal Intergenic	Distal Intergenic	13	1872769	1906735	33967	1	394026	NM_201051	-207889	ENSDARG00000101701	bone morphogenetic protein 5	17.8934	20.5937	62.8622	159.387	50.823	36.5746	29.411	8.50344	13.7367	14.6594	7.38122	14.4776	bmp5_-207889	48.256	12.5637
bmp5	0	0	117.381	24.5202	31.5501	9.30145	0	44.2635	86.4372	4.4188	80.7532	36.2387	-0.113705	1.42777	0.936525	0.957605	chr13	1669296	1669582	chr13:1669296-1669582	287	*	Distal Intergenic	Distal Intergenic	13	1872769	1906735	33967	1	394026	NM_201051	-203187	ENSDARG00000101701	bone morphogenetic protein 5	1.37641	8.67103	8.30256	14.2128	4.99898	26.3337	1.54795	15.3062	8.74155	10.471	9.02149	6.4345	bmp5_-203187	10.0937	8.66713
bmp5	0	0	117.381	24.5202	31.5501	9.30145	0	44.2635	86.4372	4.4188	80.7532	36.2387	-0.113705	1.42777	0.936525	0.957605	chr13	1674311	1674579	chr13:1674311-1674579	269	*	Distal Intergenic	Distal Intergenic	13	1872769	1906735	33967	1	394026	NM_201051	-198190	ENSDARG00000101701	bone morphogenetic protein 5	1.37641	5.41939	3.55824	13.1976	4.16582	10.2409	13.9315	8.50344	3.74638	11.6677	9.02149	8.04312	bmp5_-198190	7.54917	8.11966
bmp5	0	0	117.381	24.5202	31.5501	9.30145	0	44.2635	86.4372	4.4188	80.7532	36.2387	-0.113705	1.42777	0.936525	0.957605	chr13	1676888	1677047	chr13:1676888-1677047	160	*	Distal Intergenic	Distal Intergenic	13	1872769	1906735	33967	1	394026	NM_201051	-195722	ENSDARG00000101701	bone morphogenetic protein 5	11.0113	5.41939	3.55824	10.152	9.1648	1.46298	1.54795	11.9048	2.49759	3.59005	4.92081	6.4345	bmp5_-195722	6.77769	4.36074
bmp5	0	0	117.381	24.5202	31.5501	9.30145	0	44.2635	86.4372	4.4188	80.7532	36.2387	-0.113705	1.42777	0.936525	0.957605	chr13	1677823	1678015	chr13:1677823-1678015	193	*	Distal Intergenic	Distal Intergenic	13	1872769	1906735	33967	1	394026	NM_201051	-194754	ENSDARG00000101701	bone morphogenetic protein 5	1.37641	3.25164	1.18608	11.1672	3.33266	13.1669	3.0959	1.70069	1.24879	4.48756	2.46041	1.60862	bmp5_-194754	4.78468	2.45135
bmp5	0	0	117.381	24.5202	31.5501	9.30145	0	44.2635	86.4372	4.4188	80.7532	36.2387	-0.113705	1.42777	0.936525	0.957605	chr13	1682783	1682925	chr13:1682783-1682925	143	*	Distal Intergenic	Distal Intergenic	13	1872769	1906735	33967	1	394026	NM_201051	-189844	ENSDARG00000101701	bone morphogenetic protein 5	1.37641	1.08388	1.18608	5.076	4.16582	13.1669	10.8356	5.10206	6.24397	5.0859	8.20135	4.82587	bmp5_-189844	5.24909	6.08927
bmp5	0	0	117.381	24.5202	31.5501	9.30145	0	44.2635	86.4372	4.4188	80.7532	36.2387	-0.113705	1.42777	0.936525	0.957605	chr13	1684960	1685286	chr13:1684960-1685286	327	*	Distal Intergenic	Distal Intergenic	13	1872769	1906735	33967	1	394026	NM_201051	-187483	ENSDARG00000101701	bone morphogenetic protein 5	39.916	14.0904	79.4673	96.4441	10.8311	39.5006	10.8356	8.50344	6.24397	7.1801	2.46041	6.4345	bmp5_-187483	37.4486	5.57974
bmp5	0	0	117.381	24.5202	31.5501	9.30145	0	44.2635	86.4372	4.4188	80.7532	36.2387	-0.113705	1.42777	0.936525	0.957605	chr13	1687464	1687588	chr13:1687464-1687588	125	*	Distal Intergenic	Distal Intergenic	13	1872769	1906735	33967	1	394026	NM_201051	-185181	ENSDARG00000101701	bone morphogenetic protein 5	1.37641	1.08388	3.55824	12.1824	16.6633	1.46298	4.64384	1.70069	1.24879	0.299171	0.820135	1.60862	bmp5_-185181	5.33397	0.994181
bmp5	0	0	117.381	24.5202	31.5501	9.30145	0	44.2635	86.4372	4.4188	80.7532	36.2387	-0.113705	1.42777	0.936525	0.957605	chr13	1695925	1696225	chr13:1695925-1696225	301	*	Distal Intergenic	Distal Intergenic	13	1872769	1906735	33967	1	394026	NM_201051	-176544	ENSDARG00000101701	bone morphogenetic protein 5	4.12924	1.08388	10.6747	13.1976	9.99797	1.46298	1.54795	5.10206	8.74155	9.57346	7.38122	6.4345	bmp5_-176544	5.89955	8.03268
bmp5	0	0	117.381	24.5202	31.5501	9.30145	0	44.2635	86.4372	4.4188	80.7532	36.2387	-0.113705	1.42777	0.936525	0.957605	chr13	1696234	1696456	chr13:1696234-1696456	223	*	Distal Intergenic	Distal Intergenic	13	1872769	1906735	33967	1	394026	NM_201051	-176313	ENSDARG00000101701	bone morphogenetic protein 5	1.37641	2.16776	3.55824	3.0456	8.33164	1.46298	1.54795	1.70069	18.7319	5.98341	7.38122	6.4345	bmp5_-176313	2.89891	9.63276
bmp5	0	0	117.381	24.5202	31.5501	9.30145	0	44.2635	86.4372	4.4188	80.7532	36.2387	-0.113705	1.42777	0.936525	0.957605	chr13	1703604	1703778	chr13:1703604-1703778	175	*	Distal Intergenic	Distal Intergenic	13	1872769	1906735	33967	1	394026	NM_201051	-168991	ENSDARG00000101701	bone morphogenetic protein 5	15.1405	17.3421	27.2798	31.4712	15.8301	11.7039	10.8356	5.10206	14.9855	4.78673	10.6618	3.21725	bmp5_-168991	16.8382	8.41281
bmp5	0	0	117.381	24.5202	31.5501	9.30145	0	44.2635	86.4372	4.4188	80.7532	36.2387	-0.113705	1.42777	0.936525	0.957605	chr13	1704699	1704817	chr13:1704699-1704817	119	*	Distal Intergenic	Distal Intergenic	13	1872769	1906735	33967	1	394026	NM_201051	-167952	ENSDARG00000101701	bone morphogenetic protein 5	12.3877	5.41939	1.18608	1.0152	0.833164	1.46298	1.54795	1.70069	37.4638	1.79502	9.84162	8.04312	bmp5_-167952	3.19415	14.2859
bmp5	0	0	117.381	24.5202	31.5501	9.30145	0	44.2635	86.4372	4.4188	80.7532	36.2387	-0.113705	1.42777	0.936525	0.957605	chr13	1707073	1707355	chr13:1707073-1707355	283	*	Distal Intergenic	Distal Intergenic	13	1872769	1906735	33967	1	394026	NM_201051	-165414	ENSDARG00000101701	bone morphogenetic protein 5	4.12924	2.16776	5.9304	4.0608	4.16582	4.38895	1.54795	1.70069	3.74638	9.57346	6.56108	17.6949	bmp5_-165414	3.51145	9.39395
bmp5	0	0	117.381	24.5202	31.5501	9.30145	0	44.2635	86.4372	4.4188	80.7532	36.2387	-0.113705	1.42777	0.936525	0.957605	chr13	1714702	1715176	chr13:1714702-1715176	475	*	Distal Intergenic	Distal Intergenic	13	1872769	1906735	33967	1	394026	NM_201051	-157593	ENSDARG00000101701	bone morphogenetic protein 5	39.916	48.7745	8.30256	5.076	0.833164	1.46298	1.54795	15.3062	63.6884	25.7287	35.2658	78.8226	bmp5_-157593	15.1524	50.8764
bmp5	0	0	117.381	24.5202	31.5501	9.30145	0	44.2635	86.4372	4.4188	80.7532	36.2387	-0.113705	1.42777	0.936525	0.957605	chr13	1719792	1720023	chr13:1719792-1720023	232	*	Distal Intergenic	Distal Intergenic	13	1872769	1906735	33967	1	394026	NM_201051	-152746	ENSDARG00000101701	bone morphogenetic protein 5	4.12924	2.16776	1.18608	12.1824	6.66531	1.46298	1.54795	13.6055	8.74155	8.67595	8.20135	1.60862	bmp5_-152746	5.3684	6.80687
bmp5	0	0	117.381	24.5202	31.5501	9.30145	0	44.2635	86.4372	4.4188	80.7532	36.2387	-0.113705	1.42777	0.936525	0.957605	chr13	1720234	1720437	chr13:1720234-1720437	204	*	Distal Intergenic	Distal Intergenic	13	1872769	1906735	33967	1	394026	NM_201051	-152332	ENSDARG00000101701	bone morphogenetic protein 5	6.88206	8.67103	1.18608	12.1824	3.33266	2.92597	4.64384	15.3062	1.24879	6.88093	3.28054	6.4345	bmp5_-152332	6.89128	4.46119
bmp5	0	0	117.381	24.5202	31.5501	9.30145	0	44.2635	86.4372	4.4188	80.7532	36.2387	-0.113705	1.42777	0.936525	0.957605	chr13	1724128	1724382	chr13:1724128-1724382	255	*	Distal Intergenic	Distal Intergenic	13	1872769	1906735	33967	1	394026	NM_201051	-148387	ENSDARG00000101701	bone morphogenetic protein 5	20.6462	16.2582	13.0469	16.2432	17.4964	7.31492	20.1233	32.3131	3.74638	2.39337	7.38122	1.60862	bmp5_-148387	17.9303	3.7824
bmp5	0	0	117.381	24.5202	31.5501	9.30145	0	44.2635	86.4372	4.4188	80.7532	36.2387	-0.113705	1.42777	0.936525	0.957605	chr13	1729543	1729788	chr13:1729543-1729788	246	*	Distal Intergenic	Distal Intergenic	13	1872769	1906735	33967	1	394026	NM_201051	-142981	ENSDARG00000101701	bone morphogenetic protein 5	9.63489	16.2582	7.11648	11.1672	5.83215	10.2409	10.8356	8.50344	3.74638	6.88093	7.38122	1.60862	bmp5_-142981	9.94861	4.90429
bmp5	0	0	117.381	24.5202	31.5501	9.30145	0	44.2635	86.4372	4.4188	80.7532	36.2387	-0.113705	1.42777	0.936525	0.957605	chr13	1732173	1732337	chr13:1732173-1732337	165	*	Distal Intergenic	Distal Intergenic	13	1872769	1906735	33967	1	394026	NM_201051	-140432	ENSDARG00000101701	bone morphogenetic protein 5	15.1405	14.0904	8.30256	17.2584	24.1618	42.4266	20.1233	32.3131	36.215	24.2328	33.6255	40.2156	bmp5_-140432	21.7271	33.5722
bmp5	0	0	117.381	24.5202	31.5501	9.30145	0	44.2635	86.4372	4.4188	80.7532	36.2387	-0.113705	1.42777	0.936525	0.957605	chr13	1734611	1735028	chr13:1734611-1735028	418	*	Distal Intergenic	Distal Intergenic	13	1872769	1906735	33967	1	394026	NM_201051	-137741	ENSDARG00000101701	bone morphogenetic protein 5	4.12924	16.2582	22.5355	19.2888	37.4924	19.0188	7.73974	15.3062	16.2343	8.97512	18.043	22.5207	bmp5_-137741	17.7211	16.4433
bmp5	0	0	117.381	24.5202	31.5501	9.30145	0	44.2635	86.4372	4.4188	80.7532	36.2387	-0.113705	1.42777	0.936525	0.957605	chr13	1737496	1737632	chr13:1737496-1737632	137	*	Distal Intergenic	Distal Intergenic	13	1872769	1906735	33967	1	394026	NM_201051	-135137	ENSDARG00000101701	bone morphogenetic protein 5	6.88206	35.768	9.48864	31.4712	19.9959	45.3525	47.9864	49.3199	56.1957	37.6955	39.3665	56.3019	bmp5_-135137	30.7831	47.3899
bmp5	0	0	117.381	24.5202	31.5501	9.30145	0	44.2635	86.4372	4.4188	80.7532	36.2387	-0.113705	1.42777	0.936525	0.957605	chr13	1739883	1740170	chr13:1739883-1740170	288	*	Distal Intergenic	Distal Intergenic	13	1872769	1906735	33967	1	394026	NM_201051	-132599	ENSDARG00000101701	bone morphogenetic protein 5	4.12924	5.41939	13.0469	13.1976	14.1638	13.1669	1.54795	10.2041	26.2247	9.87263	9.02149	8.04312	bmp5_-132599	9.35948	13.2905
bmp5	0	0	117.381	24.5202	31.5501	9.30145	0	44.2635	86.4372	4.4188	80.7532	36.2387	-0.113705	1.42777	0.936525	0.957605	chr13	1746416	1746569	chr13:1746416-1746569	154	*	Distal Intergenic	Distal Intergenic	13	1872769	1906735	33967	1	394026	NM_201051	-126200	ENSDARG00000101701	bone morphogenetic protein 5	1.37641	2.16776	3.55824	9.13681	9.1648	1.46298	1.54795	11.9048	6.24397	5.0859	4.10068	1.60862	bmp5_-126200	5.03997	4.25979
bmp5	0	0	117.381	24.5202	31.5501	9.30145	0	44.2635	86.4372	4.4188	80.7532	36.2387	-0.113705	1.42777	0.936525	0.957605	chr13	1746618	1746770	chr13:1746618-1746770	153	*	Distal Intergenic	Distal Intergenic	13	1872769	1906735	33967	1	394026	NM_201051	-125999	ENSDARG00000101701	bone morphogenetic protein 5	4.12924	5.41939	8.30256	13.1976	7.49848	2.92597	1.54795	10.2041	3.74638	5.98341	3.28054	4.82587	bmp5_-125999	6.65316	4.45905
bmp5	0	0	117.381	24.5202	31.5501	9.30145	0	44.2635	86.4372	4.4188	80.7532	36.2387	-0.113705	1.42777	0.936525	0.957605	chr13	1754124	1754304	chr13:1754124-1754304	181	*	Distal Intergenic	Distal Intergenic	13	1872769	1906735	33967	1	394026	NM_201051	-118465	ENSDARG00000101701	bone morphogenetic protein 5	5.50565	8.67103	1.18608	2.0304	4.16582	4.38895	9.28769	1.70069	7.49276	4.48756	0.820135	1.60862	bmp5_-118465	4.61704	3.60227
bmp5	0	0	117.381	24.5202	31.5501	9.30145	0	44.2635	86.4372	4.4188	80.7532	36.2387	-0.113705	1.42777	0.936525	0.957605	chr13	1755598	1755779	chr13:1755598-1755779	182	*	Distal Intergenic	Distal Intergenic	13	1872769	1906735	33967	1	394026	NM_201051	-116990	ENSDARG00000101701	bone morphogenetic protein 5	1.37641	3.25164	2.37216	10.152	3.33266	13.1669	1.54795	1.70069	1.24879	5.68424	4.92081	1.60862	bmp5_-116990	4.61255	3.36562
bmp5	0	0	117.381	24.5202	31.5501	9.30145	0	44.2635	86.4372	4.4188	80.7532	36.2387	-0.113705	1.42777	0.936525	0.957605	chr13	1757858	1758188	chr13:1757858-1758188	331	*	Distal Intergenic	Distal Intergenic	13	1872769	1906735	33967	1	394026	NM_201051	-114581	ENSDARG00000101701	bone morphogenetic protein 5	4.12924	11.9227	2.37216	10.152	7.49848	1.46298	7.73974	1.70069	8.74155	12.5652	6.56108	14.4776	bmp5_-114581	5.87224	10.5864
bmp5	0	0	117.381	24.5202	31.5501	9.30145	0	44.2635	86.4372	4.4188	80.7532	36.2387	-0.113705	1.42777	0.936525	0.957605	chr13	1774973	1775329	chr13:1774973-1775329	357	*	Distal Intergenic	Distal Intergenic	13	1872769	1906735	33967	1	394026	NM_201051	-97440	ENSDARG00000101701	bone morphogenetic protein 5	4.12924	10.8388	8.30256	7.10641	7.49848	5.85194	4.64384	6.80275	3.74638	14.3602	5.74095	20.9121	bmp5_-97440	6.89675	11.1899
bmp5	0	0	117.381	24.5202	31.5501	9.30145	0	44.2635	86.4372	4.4188	80.7532	36.2387	-0.113705	1.42777	0.936525	0.957605	chr13	1781368	1781719	chr13:1781368-1781719	352	*	Distal Intergenic	Distal Intergenic	13	1872769	1906735	33967	1	394026	NM_201051	-91050	ENSDARG00000101701	bone morphogenetic protein 5	37.1631	23.8453	10.6747	7.10641	10.8311	16.0928	1.54795	8.50344	48.7029	20.9419	35.2658	82.0399	bmp5_-91050	14.4706	46.7376
bmp5	0	0	117.381	24.5202	31.5501	9.30145	0	44.2635	86.4372	4.4188	80.7532	36.2387	-0.113705	1.42777	0.936525	0.957605	chr13	1785763	1785994	chr13:1785763-1785994	232	*	Distal Intergenic	Distal Intergenic	13	1872769	1906735	33967	1	394026	NM_201051	-86775	ENSDARG00000101701	bone morphogenetic protein 5	1.37641	11.9227	1.18608	3.0456	1.66633	1.46298	4.64384	1.70069	4.99517	6.28258	6.56108	8.04312	bmp5_-86775	3.37558	6.47049
bmp5	0	0	117.381	24.5202	31.5501	9.30145	0	44.2635	86.4372	4.4188	80.7532	36.2387	-0.113705	1.42777	0.936525	0.957605	chr13	1786663	1786783	chr13:1786663-1786783	121	*	Distal Intergenic	Distal Intergenic	13	1872769	1906735	33967	1	394026	NM_201051	-85986	ENSDARG00000101701	bone morphogenetic protein 5	1.37641	2.16776	1.18608	3.0456	0.833164	2.92597	1.54795	1.70069	8.74155	4.78673	6.56108	14.4776	bmp5_-85986	1.84795	8.64175
bmp5	0	0	117.381	24.5202	31.5501	9.30145	0	44.2635	86.4372	4.4188	80.7532	36.2387	-0.113705	1.42777	0.936525	0.957605	chr13	1797327	1797724	chr13:1797327-1797724	398	*	Distal Intergenic	Distal Intergenic	13	1872769	1906735	33967	1	394026	NM_201051	-75045	ENSDARG00000101701	bone morphogenetic protein 5	1.37641	4.33551	20.1634	20.304	5.83215	5.85194	7.73974	8.50344	11.2391	7.77844	4.92081	1.60862	bmp5_-75045	9.26332	6.38675
bmp5	0	0	117.381	24.5202	31.5501	9.30145	0	44.2635	86.4372	4.4188	80.7532	36.2387	-0.113705	1.42777	0.936525	0.957605	chr13	1798078	1798343	chr13:1798078-1798343	266	*	Distal Intergenic	Distal Intergenic	13	1872769	1906735	33967	1	394026	NM_201051	-74426	ENSDARG00000101701	bone morphogenetic protein 5	9.63489	2.16776	1.18608	15.228	8.33164	19.0188	3.0959	1.70069	2.49759	6.58176	11.4819	12.869	bmp5_-74426	7.54547	8.35756
bmp5	0	0	117.381	24.5202	31.5501	9.30145	0	44.2635	86.4372	4.4188	80.7532	36.2387	-0.113705	1.42777	0.936525	0.957605	chr13	1800013	1800269	chr13:1800013-1800269	257	*	Distal Intergenic	Distal Intergenic	13	1872769	1906735	33967	1	394026	NM_201051	-72500	ENSDARG00000101701	bone morphogenetic protein 5	12.3877	11.9227	8.30256	6.0912	4.16582	8.77791	3.0959	1.70069	8.74155	3.29088	6.56108	1.60862	bmp5_-72500	7.05556	5.05053
bmp5	0	0	117.381	24.5202	31.5501	9.30145	0	44.2635	86.4372	4.4188	80.7532	36.2387	-0.113705	1.42777	0.936525	0.957605	chr13	1801888	1802126	chr13:1801888-1802126	239	*	Distal Intergenic	Distal Intergenic	13	1872769	1906735	33967	1	394026	NM_201051	-70643	ENSDARG00000101701	bone morphogenetic protein 5	1.37641	2.16776	5.9304	3.0456	4.99898	5.85194	18.5754	3.40138	14.9855	14.6594	9.02149	14.4776	bmp5_-70643	5.66848	13.286
bmp5	0	0	117.381	24.5202	31.5501	9.30145	0	44.2635	86.4372	4.4188	80.7532	36.2387	-0.113705	1.42777	0.936525	0.957605	chr13	1807520	1807644	chr13:1807520-1807644	125	*	Distal Intergenic	Distal Intergenic	13	1872769	1906735	33967	1	394026	NM_201051	-65125	ENSDARG00000101701	bone morphogenetic protein 5	9.63489	16.2582	13.0469	5.076	7.49848	10.2409	6.19179	25.5103	21.2295	17.9502	12.302	17.6949	bmp5_-65125	11.6822	17.2942
bmp5	0	0	117.381	24.5202	31.5501	9.30145	0	44.2635	86.4372	4.4188	80.7532	36.2387	-0.113705	1.42777	0.936525	0.957605	chr13	1817407	1817773	chr13:1817407-1817773	367	*	Distal Intergenic	Distal Intergenic	13	1872769	1906735	33967	1	394026	NM_201051	-54996	ENSDARG00000101701	bone morphogenetic protein 5	30.2811	27.097	1.18608	5.076	4.16582	1.46298	9.28769	1.70069	7.49276	2.69254	2.46041	8.04312	bmp5_-54996	10.0322	5.17221
bmp5	0	0	117.381	24.5202	31.5501	9.30145	0	44.2635	86.4372	4.4188	80.7532	36.2387	-0.113705	1.42777	0.936525	0.957605	chr13	1823879	1824070	chr13:1823879-1824070	192	*	Distal Intergenic	Distal Intergenic	13	1872769	1906735	33967	1	394026	NM_201051	-48699	ENSDARG00000101701	bone morphogenetic protein 5	1.37641	9.75491	4.74432	11.1672	22.4954	30.7227	7.73974	5.10206	3.74638	4.18839	0.820135	8.04312	bmp5_-48699	11.6378	4.19951
bmp5	0	0	117.381	24.5202	31.5501	9.30145	0	44.2635	86.4372	4.4188	80.7532	36.2387	-0.113705	1.42777	0.936525	0.957605	chr13	1824597	1824715	chr13:1824597-1824715	119	*	Distal Intergenic	Distal Intergenic	13	1872769	1906735	33967	1	394026	NM_201051	-48054	ENSDARG00000101701	bone morphogenetic protein 5	8.25847	2.16776	1.18608	1.0152	0.833164	1.46298	1.54795	8.50344	9.99034	2.39337	1.64027	4.82587	bmp5_-48054	3.12188	4.71246
bmp5	0	0	117.381	24.5202	31.5501	9.30145	0	44.2635	86.4372	4.4188	80.7532	36.2387	-0.113705	1.42777	0.936525	0.957605	chr13	1830825	1831003	chr13:1830825-1831003	179	*	Distal Intergenic	Distal Intergenic	13	1872769	1906735	33967	1	394026	NM_201051	-41766	ENSDARG00000101701	bone morphogenetic protein 5	1.37641	8.67103	2.37216	3.0456	9.1648	5.85194	1.54795	3.40138	7.49276	5.68424	4.10068	4.82587	bmp5_-41766	4.42891	5.52589
bmp5	0	0	117.381	24.5202	31.5501	9.30145	0	44.2635	86.4372	4.4188	80.7532	36.2387	-0.113705	1.42777	0.936525	0.957605	chr13	1835838	1836028	chr13:1835838-1836028	191	*	Distal Intergenic	Distal Intergenic	13	1872769	1906735	33967	1	394026	NM_201051	-36741	ENSDARG00000101701	bone morphogenetic protein 5	1.37641	1.08388	1.18608	9.13681	2.49949	8.77791	1.54795	8.50344	8.74155	6.28258	4.10068	8.04312	bmp5_-36741	4.264	6.79198
bmp5	0	0	117.381	24.5202	31.5501	9.30145	0	44.2635	86.4372	4.4188	80.7532	36.2387	-0.113705	1.42777	0.936525	0.957605	chr13	1857425	1857545	chr13:1857425-1857545	121	*	Distal Intergenic	Distal Intergenic	13	1872769	1906735	33967	1	394026	NM_201051	-15224	ENSDARG00000101701	bone morphogenetic protein 5	38.5395	16.2582	10.6747	7.10641	4.16582	1.46298	7.73974	5.10206	18.7319	9.87263	28.7047	65.9536	bmp5_-15224	11.3812	30.8157
bmp5	0	0	117.381	24.5202	31.5501	9.30145	0	44.2635	86.4372	4.4188	80.7532	36.2387	-0.113705	1.42777	0.936525	0.957605	chr13	1866528	1866818	chr13:1866528-1866818	291	*	Distal Intergenic	Distal Intergenic	13	1872769	1906735	33967	1	394026	NM_201051	-5951	ENSDARG00000101701	bone morphogenetic protein 5	6.88206	11.9227	8.30256	19.2888	9.99797	4.38895	4.64384	13.6055	8.74155	8.07761	2.46041	14.4776	bmp5_-5951	9.87905	8.4393
bmp5	0	0	117.381	24.5202	31.5501	9.30145	0	44.2635	86.4372	4.4188	80.7532	36.2387	-0.113705	1.42777	0.936525	0.957605	chr13	1868133	1868375	chr13:1868133-1868375	243	*	Distal Intergenic	Distal Intergenic	13	1872769	1906735	33967	1	394026	NM_201051	-4394	ENSDARG00000101701	bone morphogenetic protein 5	1.37641	1.08388	1.18608	1.0152	0.833164	4.38895	1.54795	5.10206	16.2343	5.68424	2.46041	4.82587	bmp5_-4394	2.06671	7.30121
bmp5	0	0	117.381	24.5202	31.5501	9.30145	0	44.2635	86.4372	4.4188	80.7532	36.2387	-0.113705	1.42777	0.936525	0.957605	chr13	1870322	1870498	chr13:1870322-1870498	177	*	Promoter (2-3kb)	Promoter	13	1872769	1906735	33967	1	394026	NM_201051	-2271	ENSDARG00000101701	bone morphogenetic protein 5	13.7641	1.08388	1.18608	4.0608	10.8311	2.92597	10.8356	6.80275	2.49759	4.18839	9.84162	1.60862	bmp5_-2271	6.4363	4.53406
bmp5	0	0	117.381	24.5202	31.5501	9.30145	0	44.2635	86.4372	4.4188	80.7532	36.2387	-0.113705	1.42777	0.936525	0.957605	chr13	1873045	1873493	chr13:1873045-1873493	449	*	Promoter (<=1kb)	Promoter	13	1872769	1906735	33967	1	394026	NM_201051	276	ENSDARG00000101701	bone morphogenetic protein 5	15.1405	11.9227	23.7216	28.4256	26.6613	16.0928	6.19179	30.6124	7.49276	10.7701	4.10068	14.4776	bmp5_276	19.8461	9.2103
bmp5	0	0	117.381	24.5202	31.5501	9.30145	0	44.2635	86.4372	4.4188	80.7532	36.2387	-0.113705	1.42777	0.936525	0.957605	chr13	1875673	1876053	chr13:1875673-1876053	381	*	Promoter (2-3kb)	Promoter	13	1872769	1906735	33967	1	394026	NM_201051	2904	ENSDARG00000101701	bone morphogenetic protein 5	28.9047	3.25164	39.1406	25.38	22.4954	20.4818	7.73974	1.70069	4.99517	3.59005	6.56108	14.4776	bmp5_2904	18.6368	7.40598
bmp5	0	0	117.381	24.5202	31.5501	9.30145	0	44.2635	86.4372	4.4188	80.7532	36.2387	-0.113705	1.42777	0.936525	0.957605	chr13	1888908	1889391	chr13:1888908-1889391	484	*	Intron (NM_201051/394026, intron 2 of 6)	Intron	13	1872769	1906735	33967	1	394026	NM_201051	16139	ENSDARG00000101701	bone morphogenetic protein 5	39.916	11.9227	15.419	15.228	22.4954	13.1669	13.9315	6.80275	18.7319	15.5569	14.7624	8.04312	bmp5_16139	17.3603	14.2736
bmp5	0	0	117.381	24.5202	31.5501	9.30145	0	44.2635	86.4372	4.4188	80.7532	36.2387	-0.113705	1.42777	0.936525	0.957605	chr13	1891789	1891906	chr13:1891789-1891906	118	*	Intron (NM_201051/394026, intron 2 of 6)	Intron	13	1872769	1906735	33967	1	394026	NM_201051	19020	ENSDARG00000101701	bone morphogenetic protein 5	6.88206	4.33551	3.55824	10.152	0.833164	2.92597	3.0959	10.2041	3.74638	2.99171	0.820135	1.60862	bmp5_19020	5.24837	2.29171
bmp5	0	0	117.381	24.5202	31.5501	9.30145	0	44.2635	86.4372	4.4188	80.7532	36.2387	-0.113705	1.42777	0.936525	0.957605	chr13	1896103	1896249	chr13:1896103-1896249	147	*	Intron (NM_201051/394026, intron 2 of 6)	Intron	13	1872769	1906735	33967	1	394026	NM_201051	23334	ENSDARG00000101701	bone morphogenetic protein 5	49.5508	22.7614	5.9304	9.13681	3.33266	7.31492	1.54795	10.2041	64.9372	16.7536	37.7262	86.8657	bmp5_23334	13.7224	51.5707
bmp5	0	0	117.381	24.5202	31.5501	9.30145	0	44.2635	86.4372	4.4188	80.7532	36.2387	-0.113705	1.42777	0.936525	0.957605	chr13	1899325	1899769	chr13:1899325-1899769	445	*	Exon (NM_201051/394026, exon 4 of 7)	Exon	13	1872769	1906735	33967	1	394026	NM_201051	26556	ENSDARG00000101701	bone morphogenetic protein 5	1.37641	15.1743	5.9304	9.13681	12.4975	1.46298	3.0959	17.0069	26.2247	12.5652	21.3235	3.21725	bmp5_26556	8.21014	15.8326
bmp5	0	0	117.381	24.5202	31.5501	9.30145	0	44.2635	86.4372	4.4188	80.7532	36.2387	-0.113705	1.42777	0.936525	0.957605	chr13	1903670	1903869	chr13:1903670-1903869	200	*	Intron (NM_201051/394026, intron 4 of 6)	Intron	13	1872769	1906735	33967	1	394026	NM_201051	30901	ENSDARG00000101701	bone morphogenetic protein 5	1.37641	3.25164	1.18608	4.0608	6.66531	5.85194	1.54795	6.80275	6.24397	10.1718	11.4819	9.65175	bmp5_30901	3.84286	9.38735
bmper	1.44023	0	2.05932	0.681117	1.97188	37.2058	12.0955	66.3952	27.6119	64.8091	91.765	27.8214	-5.32554	0.784356	1.12367e-11	1.32493e-10	chr16	7058944	7059121	chr16:7058944-7059121	178	*	Distal Intergenic	Distal Intergenic	16	7154298	7195677	41380	1	338246	NM_001020487	-95177	ENSDARG00000101980	BMP binding endothelial regulator	8.25847	1.08388	3.55824	1.0152	2.49949	1.46298	1.54795	3.40138	11.2391	3.59005	4.10068	4.82587	bmper_-95177	2.85345	5.93893
bmper	1.44023	0	2.05932	0.681117	1.97188	37.2058	12.0955	66.3952	27.6119	64.8091	91.765	27.8214	-5.32554	0.784356	1.12367e-11	1.32493e-10	chr16	7069377	7069566	chr16:7069377-7069566	190	*	Distal Intergenic	Distal Intergenic	16	7154298	7195677	41380	1	338246	NM_001020487	-84732	ENSDARG00000101980	BMP binding endothelial regulator	11.0113	4.33551	1.18608	1.0152	0.833164	1.46298	1.54795	1.70069	11.2391	5.68424	13.1222	8.04312	bmper_-84732	2.88661	9.52217
bmper	1.44023	0	2.05932	0.681117	1.97188	37.2058	12.0955	66.3952	27.6119	64.8091	91.765	27.8214	-5.32554	0.784356	1.12367e-11	1.32493e-10	chr16	7076623	7076802	chr16:7076623-7076802	180	*	Distal Intergenic	Distal Intergenic	16	7154298	7195677	41380	1	338246	NM_001020487	-77496	ENSDARG00000101980	BMP binding endothelial regulator	6.88206	3.25164	13.0469	9.13681	4.16582	1.46298	1.54795	1.70069	1.24879	2.09419	0.820135	1.60862	bmper_-77496	5.14935	1.44294
bmper	1.44023	0	2.05932	0.681117	1.97188	37.2058	12.0955	66.3952	27.6119	64.8091	91.765	27.8214	-5.32554	0.784356	1.12367e-11	1.32493e-10	chr16	7080646	7080894	chr16:7080646-7080894	249	*	Distal Intergenic	Distal Intergenic	16	7154298	7195677	41380	1	338246	NM_001020487	-73404	ENSDARG00000101980	BMP binding endothelial regulator	4.12924	9.75491	1.18608	3.0456	2.49949	5.85194	1.54795	11.9048	1.24879	10.1718	10.6618	4.82587	bmper_-73404	4.99	6.72706
bmper	1.44023	0	2.05932	0.681117	1.97188	37.2058	12.0955	66.3952	27.6119	64.8091	91.765	27.8214	-5.32554	0.784356	1.12367e-11	1.32493e-10	chr16	7084899	7085337	chr16:7084899-7085337	439	*	Distal Intergenic	Distal Intergenic	16	7154298	7195677	41380	1	338246	NM_001020487	-68961	ENSDARG00000101980	BMP binding endothelial regulator	31.6575	44.439	51.0014	51.7752	67.4863	27.7967	29.411	28.9117	8.74155	8.37678	3.28054	11.2604	bmper_-68961	41.5599	7.91481
bmper	1.44023	0	2.05932	0.681117	1.97188	37.2058	12.0955	66.3952	27.6119	64.8091	91.765	27.8214	-5.32554	0.784356	1.12367e-11	1.32493e-10	chr16	7088179	7088541	chr16:7088179-7088541	363	*	Distal Intergenic	Distal Intergenic	16	7154298	7195677	41380	1	338246	NM_001020487	-65757	ENSDARG00000101980	BMP binding endothelial regulator	20.6462	10.8388	21.3494	1.0152	5.83215	8.77791	10.8356	11.9048	9.99034	5.38507	5.74095	1.60862	bmper_-65757	11.4	5.68125
bmper	1.44023	0	2.05932	0.681117	1.97188	37.2058	12.0955	66.3952	27.6119	64.8091	91.765	27.8214	-5.32554	0.784356	1.12367e-11	1.32493e-10	chr16	7092683	7092987	chr16:7092683-7092987	305	*	Distal Intergenic	Distal Intergenic	16	7154298	7195677	41380	1	338246	NM_001020487	-61311	ENSDARG00000101980	BMP binding endothelial regulator	17.8934	16.2582	17.7912	19.2888	16.6633	13.1669	20.1233	20.4083	22.4783	15.2577	14.7624	24.1294	bmper_-61311	17.6992	19.1569
bmper	1.44023	0	2.05932	0.681117	1.97188	37.2058	12.0955	66.3952	27.6119	64.8091	91.765	27.8214	-5.32554	0.784356	1.12367e-11	1.32493e-10	chr16	7099557	7099685	chr16:7099557-7099685	129	*	Distal Intergenic	Distal Intergenic	16	7154298	7195677	41380	1	338246	NM_001020487	-54613	ENSDARG00000101980	BMP binding endothelial regulator	161.04	247.124	161.307	152.28	161.634	191.651	208.973	256.804	290.969	146.594	211.595	355.506	bmper_-54613	192.602	251.166
bmper	1.44023	0	2.05932	0.681117	1.97188	37.2058	12.0955	66.3952	27.6119	64.8091	91.765	27.8214	-5.32554	0.784356	1.12367e-11	1.32493e-10	chr16	7105171	7105485	chr16:7105171-7105485	315	*	Distal Intergenic	Distal Intergenic	16	7154298	7195677	41380	1	338246	NM_001020487	-48813	ENSDARG00000101980	BMP binding endothelial regulator	56.4329	35.768	51.0014	31.4712	13.3306	48.2785	4.64384	27.211	7.49276	8.07761	9.02149	16.0862	bmper_-48813	33.5172	10.1695
bmper	1.44023	0	2.05932	0.681117	1.97188	37.2058	12.0955	66.3952	27.6119	64.8091	91.765	27.8214	-5.32554	0.784356	1.12367e-11	1.32493e-10	chr16	7107595	7107952	chr16:7107595-7107952	358	*	Distal Intergenic	Distal Intergenic	16	7154298	7195677	41380	1	338246	NM_001020487	-46346	ENSDARG00000101980	BMP binding endothelial regulator	31.6575	70.4521	39.1406	25.38	57.4883	40.9636	9.28769	79.9323	22.4783	16.7536	6.56108	19.3035	bmper_-46346	44.2878	16.2741
bmper	1.44023	0	2.05932	0.681117	1.97188	37.2058	12.0955	66.3952	27.6119	64.8091	91.765	27.8214	-5.32554	0.784356	1.12367e-11	1.32493e-10	chr16	7122819	7122995	chr16:7122819-7122995	177	*	Distal Intergenic	Distal Intergenic	16	7154298	7195677	41380	1	338246	NM_001020487	-31303	ENSDARG00000101980	BMP binding endothelial regulator	1.37641	1.08388	1.18608	1.0152	0.833164	5.85194	1.54795	6.80275	17.4831	5.68424	6.56108	6.4345	bmper_-31303	2.46217	9.04073
bmper	1.44023	0	2.05932	0.681117	1.97188	37.2058	12.0955	66.3952	27.6119	64.8091	91.765	27.8214	-5.32554	0.784356	1.12367e-11	1.32493e-10	chr16	7127884	7128009	chr16:7127884-7128009	126	*	Distal Intergenic	Distal Intergenic	16	7154298	7195677	41380	1	338246	NM_001020487	-26289	ENSDARG00000101980	BMP binding endothelial regulator	6.88206	2.16776	13.0469	12.1824	4.16582	4.38895	1.54795	6.80275	1.24879	2.69254	0.820135	1.60862	bmper_-26289	6.39807	1.59252
bmper	1.44023	0	2.05932	0.681117	1.97188	37.2058	12.0955	66.3952	27.6119	64.8091	91.765	27.8214	-5.32554	0.784356	1.12367e-11	1.32493e-10	chr16	7134799	7134949	chr16:7134799-7134949	151	*	Distal Intergenic	Distal Intergenic	16	7154298	7195677	41380	1	338246	NM_001020487	-19349	ENSDARG00000101980	BMP binding endothelial regulator	1.37641	1.08388	8.30256	1.0152	2.49949	1.46298	7.73974	11.9048	3.74638	7.47927	4.10068	17.6949	bmper_-19349	4.42313	8.2553
bmper	1.44023	0	2.05932	0.681117	1.97188	37.2058	12.0955	66.3952	27.6119	64.8091	91.765	27.8214	-5.32554	0.784356	1.12367e-11	1.32493e-10	chr16	7140111	7140809	chr16:7140111-7140809	699	*	Distal Intergenic	Distal Intergenic	16	7154298	7195677	41380	1	338246	NM_001020487	-13489	ENSDARG00000101980	BMP binding endothelial regulator	12.3877	1.08388	13.0469	1.0152	5.83215	7.31492	7.73974	22.1089	13.7367	21.5403	30.345	14.4776	bmper_-13489	8.81618	20.0249
bmper	1.44023	0	2.05932	0.681117	1.97188	37.2058	12.0955	66.3952	27.6119	64.8091	91.765	27.8214	-5.32554	0.784356	1.12367e-11	1.32493e-10	chr16	7143283	7143514	chr16:7143283-7143514	232	*	Distal Intergenic	Distal Intergenic	16	7154298	7195677	41380	1	338246	NM_001020487	-10784	ENSDARG00000101980	BMP binding endothelial regulator	9.63489	1.08388	1.18608	1.0152	0.833164	4.38895	1.54795	5.10206	11.2391	6.58176	14.7624	8.04312	bmper_-10784	3.09902	10.1566
bmper	1.44023	0	2.05932	0.681117	1.97188	37.2058	12.0955	66.3952	27.6119	64.8091	91.765	27.8214	-5.32554	0.784356	1.12367e-11	1.32493e-10	chr16	7154139	7154410	chr16:7154139-7154410	272	*	Promoter (<=1kb)	Promoter	16	7154298	7195677	41380	1	338246	NM_001020487	0	ENSDARG00000101980	BMP binding endothelial regulator	6.88206	11.9227	3.55824	1.0152	0.833164	4.38895	12.3836	22.1089	14.9855	8.07761	11.4819	9.65175	bmper_0	7.8866	11.0492
bmper	1.44023	0	2.05932	0.681117	1.97188	37.2058	12.0955	66.3952	27.6119	64.8091	91.765	27.8214	-5.32554	0.784356	1.12367e-11	1.32493e-10	chr16	7161131	7161395	chr16:7161131-7161395	265	*	Exon (NM_001020487/338246, exon 3 of 14)	Exon	16	7154298	7195677	41380	1	338246	NM_001020487	6833	ENSDARG00000101980	BMP binding endothelial regulator	26.1518	20.5937	26.0937	1.0152	4.16582	1.46298	7.73974	13.6055	47.4541	11.0693	22.1436	20.9121	bmper_6833	12.6036	25.3948
bmper	1.44023	0	2.05932	0.681117	1.97188	37.2058	12.0955	66.3952	27.6119	64.8091	91.765	27.8214	-5.32554	0.784356	1.12367e-11	1.32493e-10	chr16	7171858	7172122	chr16:7171858-7172122	265	*	Exon (NM_001020487/338246, exon 7 of 14)	Exon	16	7154298	7195677	41380	1	338246	NM_001020487	17560	ENSDARG00000101980	BMP binding endothelial regulator	1.37641	2.16776	1.18608	7.10641	2.49949	16.0928	1.54795	6.80275	7.49276	7.1801	12.302	3.21725	bmper_17560	4.84746	7.54803
bmper	1.44023	0	2.05932	0.681117	1.97188	37.2058	12.0955	66.3952	27.6119	64.8091	91.765	27.8214	-5.32554	0.784356	1.12367e-11	1.32493e-10	chr16	7175935	7176102	chr16:7175935-7176102	168	*	Exon (NM_001020487/338246, exon 8 of 14)	Exon	16	7154298	7195677	41380	1	338246	NM_001020487	21637	ENSDARG00000101980	BMP binding endothelial regulator	4.12924	2.16776	3.55824	1.0152	0.833164	13.1669	1.54795	5.10206	8.74155	8.07761	4.92081	1.60862	bmper_21637	3.94006	5.83715
bmper	1.44023	0	2.05932	0.681117	1.97188	37.2058	12.0955	66.3952	27.6119	64.8091	91.765	27.8214	-5.32554	0.784356	1.12367e-11	1.32493e-10	chr16	7179066	7179306	chr16:7179066-7179306	241	*	Exon (NM_001020487/338246, exon 11 of 14)	Exon	16	7154298	7195677	41380	1	338246	NM_001020487	24768	ENSDARG00000101980	BMP binding endothelial regulator	6.88206	3.25164	3.55824	5.076	4.16582	1.46298	12.3836	8.50344	16.2343	6.88093	13.9423	8.04312	bmper_24768	5.66047	11.2752
bmper	1.44023	0	2.05932	0.681117	1.97188	37.2058	12.0955	66.3952	27.6119	64.8091	91.765	27.8214	-5.32554	0.784356	1.12367e-11	1.32493e-10	chr16	7182718	7182852	chr16:7182718-7182852	135	*	Intron (NM_001020487/338246, intron 11 of 13)	Intron	16	7154298	7195677	41380	1	338246	NM_001020487	28420	ENSDARG00000101980	BMP binding endothelial regulator	1.37641	7.58715	8.30256	1.0152	10.8311	21.9448	10.8356	11.9048	16.2343	9.57346	12.302	14.4776	bmper_28420	9.22471	13.1469
bmper	1.44023	0	2.05932	0.681117	1.97188	37.2058	12.0955	66.3952	27.6119	64.8091	91.765	27.8214	-5.32554	0.784356	1.12367e-11	1.32493e-10	chr16	7184519	7184827	chr16:7184519-7184827	309	*	Exon (NM_001020487/338246, exon 12 of 14)	Exon	16	7154298	7195677	41380	1	338246	NM_001020487	30221	ENSDARG00000101980	BMP binding endothelial regulator	1.37641	1.08388	3.55824	3.0456	0.833164	1.46298	1.54795	1.70069	6.24397	10.471	17.2228	11.2604	bmper_30221	1.82611	11.2995
bmpr1ab	263.563	44.7283	429.711	399.816	796.639	204.632	291.392	364.067	170.473	131.091	359.719	314.166	0.609312	0.559292	0.275962	0.387849	chr12	25951771	25952057	chr12:25951771-25952057	287	*	3' UTR	3' UTR	12	25950834	26022663	71830	2	447846	NM_001004585	70606	ENSDARG00000105045	bone morphogenetic protein receptor, type IAb	35.7867	56.3617	65.2344	52.7904	47.4904	55.5934	51.0823	68.0275	41.2102	29.3187	67.2511	24.1294	bmpr1ab_70606	54.0458	40.4773
bmpr1ab	263.563	44.7283	429.711	399.816	796.639	204.632	291.392	364.067	170.473	131.091	359.719	314.166	0.609312	0.559292	0.275962	0.387849	chr12	25955242	25955451	chr12:25955242-25955451	210	*	Intron (NM_001004585/447846, intron 8 of 12)	Intron	12	25950834	26022663	71830	2	447846	NM_001004585	67212	ENSDARG00000105045	bone morphogenetic protein receptor, type IAb	17.8934	29.2647	22.5355	21.3192	20.8291	39.5006	29.411	28.9117	71.1812	49.3632	56.5893	72.3881	bmpr1ab_67212	26.2082	62.3804
bmpr1ab	263.563	44.7283	429.711	399.816	796.639	204.632	291.392	364.067	170.473	131.091	359.719	314.166	0.609312	0.559292	0.275962	0.387849	chr12	25956086	25956312	chr12:25956086-25956312	227	*	Exon (NM_001004585/447846, exon 8 of 13)	Exon	12	25950834	26022663	71830	2	447846	NM_001004585	66351	ENSDARG00000105045	bone morphogenetic protein receptor, type IAb	26.1518	16.2582	26.0937	43.6536	20.8291	51.2045	51.0823	22.1089	13.7367	9.87263	16.4027	6.4345	bmpr1ab_66351	32.1728	11.6116
bmpr1ab	263.563	44.7283	429.711	399.816	796.639	204.632	291.392	364.067	170.473	131.091	359.719	314.166	0.609312	0.559292	0.275962	0.387849	chr12	25956440	25956559	chr12:25956440-25956559	120	*	Intron (NM_001004585/447846, intron 7 of 12)	Intron	12	25950834	26022663	71830	2	447846	NM_001004585	66104	ENSDARG00000105045	bone morphogenetic protein receptor, type IAb	61.9386	16.2582	97.2585	82.2313	55.822	61.4454	54.1782	22.1089	8.74155	5.98341	8.20135	4.82587	bmpr1ab_66104	56.4051	6.93805
bmpr1ab	263.563	44.7283	429.711	399.816	796.639	204.632	291.392	364.067	170.473	131.091	359.719	314.166	0.609312	0.559292	0.275962	0.387849	chr12	25960963	25961251	chr12:25960963-25961251	289	*	Intron (NM_001004585/447846, intron 3 of 12)	Intron	12	25950834	26022663	71830	2	447846	NM_001004585	61412	ENSDARG00000105045	bone morphogenetic protein receptor, type IAb	16.5169	7.58715	27.2798	36.5472	14.1638	10.2409	13.9315	20.4083	9.99034	21.2411	30.345	1.60862	bmpr1ab_61412	18.3345	15.7963
bmpr1ab	263.563	44.7283	429.711	399.816	796.639	204.632	291.392	364.067	170.473	131.091	359.719	314.166	0.609312	0.559292	0.275962	0.387849	chr12	25965121	25965962	chr12:25965121-25965962	842	*	Intron (NM_001004585/447846, intron 3 of 12)	Intron	12	25950834	26022663	71830	2	447846	NM_001004585	56701	ENSDARG00000105045	bone morphogenetic protein receptor, type IAb	28.9047	48.7745	96.0724	216.238	240.784	229.689	178.014	147.96	56.1957	54.7482	45.1074	36.9984	bmpr1ab_56701	148.305	48.2624
bmpr1ab	263.563	44.7283	429.711	399.816	796.639	204.632	291.392	364.067	170.473	131.091	359.719	314.166	0.609312	0.559292	0.275962	0.387849	chr12	25977350	25977909	chr12:25977350-25977909	560	*	Intron (NM_001004585/447846, intron 3 of 12)	Intron	12	25950834	26022663	71830	2	447846	NM_001004585	44754	ENSDARG00000105045	bone morphogenetic protein receptor, type IAb	97.7253	81.2909	174.354	235.527	194.127	299.912	213.617	127.552	23.7271	26.6262	22.1436	40.2156	bmpr1ab_44754	178.013	28.1781
bmpr1ab	263.563	44.7283	429.711	399.816	796.639	204.632	291.392	364.067	170.473	131.091	359.719	314.166	0.609312	0.559292	0.275962	0.387849	chr12	25982488	25982886	chr12:25982488-25982886	399	*	5' UTR	5' UTR	12	25950834	26022663	71830	2	447846	NM_001004585	39777	ENSDARG00000105045	bone morphogenetic protein receptor, type IAb	4.12924	11.9227	1.18608	3.0456	4.16582	11.7039	1.54795	13.6055	7.49276	19.4461	17.2228	8.04312	bmpr1ab_39777	6.41334	13.0512
bmpr1ab	263.563	44.7283	429.711	399.816	796.639	204.632	291.392	364.067	170.473	131.091	359.719	314.166	0.609312	0.559292	0.275962	0.387849	chr12	25988163	25988393	chr12:25988163-25988393	231	*	Intron (NM_001004585/447846, intron 2 of 12)	Intron	12	25950834	26022663	71830	2	447846	NM_001004585	34270	ENSDARG00000105045	bone morphogenetic protein receptor, type IAb	4.12924	3.25164	8.30256	23.3496	15.8301	10.2409	20.1233	1.70069	8.74155	10.471	7.38122	12.869	bmpr1ab_34270	10.866	9.86568
bmpr1ab	263.563	44.7283	429.711	399.816	796.639	204.632	291.392	364.067	170.473	131.091	359.719	314.166	0.609312	0.559292	0.275962	0.387849	chr12	25988917	25989234	chr12:25988917-25989234	318	*	Intron (NM_001004585/447846, intron 2 of 12)	Intron	12	25950834	26022663	71830	2	447846	NM_001004585	33429	ENSDARG00000105045	bone morphogenetic protein receptor, type IAb	8.25847	10.8388	30.8381	23.3496	34.9929	19.0188	4.64384	3.40138	8.74155	7.47927	16.4027	12.869	bmpr1ab_33429	16.9177	11.3731
bmpr1ab	263.563	44.7283	429.711	399.816	796.639	204.632	291.392	364.067	170.473	131.091	359.719	314.166	0.609312	0.559292	0.275962	0.387849	chr12	25991213	25991598	chr12:25991213-25991598	386	*	Intron (NM_001004585/447846, intron 2 of 12)	Intron	12	25950834	26022663	71830	2	447846	NM_001004585	31065	ENSDARG00000105045	bone morphogenetic protein receptor, type IAb	15.1405	24.9292	23.7216	43.6536	42.4914	79.0012	24.7672	15.3062	46.2053	19.7453	19.6832	16.0862	bmpr1ab_31065	33.6264	25.43
bmpr1ab	263.563	44.7283	429.711	399.816	796.639	204.632	291.392	364.067	170.473	131.091	359.719	314.166	0.609312	0.559292	0.275962	0.387849	chr12	25993305	25993600	chr12:25993305-25993600	296	*	Intron (NM_001004585/447846, intron 2 of 12)	Intron	12	25950834	26022663	71830	2	447846	NM_001004585	29063	ENSDARG00000105045	bone morphogenetic protein receptor, type IAb	1.37641	3.25164	1.18608	7.10641	6.66531	24.8707	7.73974	11.9048	3.74638	8.97512	4.92081	1.60862	bmpr1ab_29063	8.01264	4.81273
bmpr1ab	263.563	44.7283	429.711	399.816	796.639	204.632	291.392	364.067	170.473	131.091	359.719	314.166	0.609312	0.559292	0.275962	0.387849	chr12	25994292	25994410	chr12:25994292-25994410	119	*	Intron (NM_001004585/447846, intron 2 of 12)	Intron	12	25950834	26022663	71830	2	447846	NM_001004585	28253	ENSDARG00000105045	bone morphogenetic protein receptor, type IAb	34.4103	31.4325	1.18608	1.0152	0.833164	1.46298	1.54795	1.70069	28.7222	13.7619	18.8631	62.7364	bmpr1ab_28253	9.19861	31.0209
bmpr1ab	263.563	44.7283	429.711	399.816	796.639	204.632	291.392	364.067	170.473	131.091	359.719	314.166	0.609312	0.559292	0.275962	0.387849	chr12	25995387	25995599	chr12:25995387-25995599	213	*	Intron (NM_001004585/447846, intron 2 of 12)	Intron	12	25950834	26022663	71830	2	447846	NM_001004585	27064	ENSDARG00000105045	bone morphogenetic protein receptor, type IAb	8.25847	16.2582	3.55824	19.2888	6.66531	7.31492	10.8356	13.6055	2.49759	5.0859	0.820135	8.04312	bmpr1ab_27064	10.7231	4.11169
bmpr1ab	263.563	44.7283	429.711	399.816	796.639	204.632	291.392	364.067	170.473	131.091	359.719	314.166	0.609312	0.559292	0.275962	0.387849	chr12	25995993	25996264	chr12:25995993-25996264	272	*	Intron (NM_001004585/447846, intron 2 of 12)	Intron	12	25950834	26022663	71830	2	447846	NM_001004585	26399	ENSDARG00000105045	bone morphogenetic protein receptor, type IAb	15.1405	11.9227	29.652	5.076	14.1638	5.85194	1.54795	15.3062	1.24879	2.39337	4.92081	4.82587	bmpr1ab_26399	12.3326	3.34721
bmpr1ab	263.563	44.7283	429.711	399.816	796.639	204.632	291.392	364.067	170.473	131.091	359.719	314.166	0.609312	0.559292	0.275962	0.387849	chr12	26001871	26002374	chr12:26001871-26002374	504	*	Intron (NM_001004585/447846, intron 2 of 12)	Intron	12	25950834	26022663	71830	2	447846	NM_001004585	20289	ENSDARG00000105045	bone morphogenetic protein receptor, type IAb	37.1631	42.2713	91.3281	111.672	244.117	87.7791	106.808	62.9254	34.9662	19.4461	11.4819	16.0862	bmpr1ab_20289	98.0081	20.4951
bmpr1ab	263.563	44.7283	429.711	399.816	796.639	204.632	291.392	364.067	170.473	131.091	359.719	314.166	0.609312	0.559292	0.275962	0.387849	chr12	26006445	26006605	chr12:26006445-26006605	161	*	Intron (NM_001004585/447846, intron 1 of 12)	Intron	12	25950834	26022663	71830	2	447846	NM_001004585	16058	ENSDARG00000105045	bone morphogenetic protein receptor, type IAb	12.3877	1.08388	1.18608	38.5776	14.997	13.1669	12.3836	8.50344	1.24879	4.78673	6.56108	4.82587	bmpr1ab_16058	12.7858	4.35562
bmpr1ab	263.563	44.7283	429.711	399.816	796.639	204.632	291.392	364.067	170.473	131.091	359.719	314.166	0.609312	0.559292	0.275962	0.387849	chr12	26008163	26008358	chr12:26008163-26008358	196	*	Intron (NM_001004585/447846, intron 1 of 12)	Intron	12	25950834	26022663	71830	2	447846	NM_001004585	14305	ENSDARG00000105045	bone morphogenetic protein receptor, type IAb	23.399	37.9357	43.8849	45.684	42.4914	33.6487	29.411	18.7076	16.2343	23.3353	20.5034	33.7811	bmpr1ab_14305	34.3953	23.4635
bmpr1ab	263.563	44.7283	429.711	399.816	796.639	204.632	291.392	364.067	170.473	131.091	359.719	314.166	0.609312	0.559292	0.275962	0.387849	chr12	26010621	26010951	chr12:26010621-26010951	331	*	Intron (NM_001004585/447846, intron 1 of 12)	Intron	12	25950834	26022663	71830	2	447846	NM_001004585	11712	ENSDARG00000105045	bone morphogenetic protein receptor, type IAb	19.2698	5.41939	36.7685	50.76	28.3276	49.7415	38.6987	30.6124	17.4831	8.67595	12.302	4.82587	bmpr1ab_11712	32.4497	10.8217
bmpr1ab	263.563	44.7283	429.711	399.816	796.639	204.632	291.392	364.067	170.473	131.091	359.719	314.166	0.609312	0.559292	0.275962	0.387849	chr12	26013487	26013714	chr12:26013487-26013714	228	*	Intron (NM_001004585/447846, intron 1 of 12)	Intron	12	25950834	26022663	71830	2	447846	NM_001004585	8949	ENSDARG00000105045	bone morphogenetic protein receptor, type IAb	6.88206	5.41939	9.48864	14.2128	12.4975	17.5558	6.19179	13.6055	16.2343	8.37678	8.20135	1.60862	bmpr1ab_8949	10.7317	8.60527
bmpr1ab	263.563	44.7283	429.711	399.816	796.639	204.632	291.392	364.067	170.473	131.091	359.719	314.166	0.609312	0.559292	0.275962	0.387849	chr12	26013759	26014026	chr12:26013759-26014026	268	*	Intron (NM_001004585/447846, intron 1 of 12)	Intron	12	25950834	26022663	71830	2	447846	NM_001004585	8637	ENSDARG00000105045	bone morphogenetic protein receptor, type IAb	12.3877	4.33551	14.233	26.3952	11.6643	23.4078	13.9315	5.10206	9.99034	2.09419	10.6618	1.60862	bmpr1ab_8637	13.9321	6.08873
bmpr1ab	263.563	44.7283	429.711	399.816	796.639	204.632	291.392	364.067	170.473	131.091	359.719	314.166	0.609312	0.559292	0.275962	0.387849	chr12	26016544	26016933	chr12:26016544-26016933	390	*	Intron (NM_001004585/447846, intron 1 of 12)	Intron	12	25950834	26022663	71830	2	447846	NM_001004585	5730	ENSDARG00000105045	bone morphogenetic protein receptor, type IAb	38.5395	24.9292	36.7685	63.9577	39.1587	68.7603	100.617	15.3062	3.74638	4.18839	4.10068	17.6949	bmpr1ab_5730	48.5046	7.43258
bmpr1ab	263.563	44.7283	429.711	399.816	796.639	204.632	291.392	364.067	170.473	131.091	359.719	314.166	0.609312	0.559292	0.275962	0.387849	chr12	26019546	26020087	chr12:26019546-26020087	542	*	Promoter (2-3kb)	Promoter	12	25950834	26022663	71830	2	447846	NM_001004585	2576	ENSDARG00000105045	bone morphogenetic protein receptor, type IAb	86.714	34.6841	126.911	167.508	81.6501	118.502	128.48	42.5172	6.24397	11.6677	13.9423	11.2604	bmpr1ab_2576	98.3707	10.7786
bmpr1ab	263.563	44.7283	429.711	399.816	796.639	204.632	291.392	364.067	170.473	131.091	359.719	314.166	0.609312	0.559292	0.275962	0.387849	chr12	26022532	26022962	chr12:26022532-26022962	431	*	Promoter (<=1kb)	Promoter	12	25950834	26022663	71830	2	447846	NM_001004585	0	ENSDARG00000105045	bone morphogenetic protein receptor, type IAb	169.299	131.149	271.612	464.962	295.773	389.154	321.973	168.368	79.9228	59.8341	105.797	40.2156	bmpr1ab_0	276.536	71.4425
bmpr1ba	0.720117	1.51621	10.983	44.9537	0	42.5209	38.4857	99.5929	0	1.47293	61.1766	27.402	-1.80109	1.35032	0.18226	0.279519	chr5	7344018	7344143	chr5:7344018-7344143	126	*	Distal Intergenic	Distal Intergenic	5	7488064	7712160	224097	2	30742	NM_131457	368017	ENSDARG00000104100	bone morphogenetic protein receptor, type IBa	1.37641	1.08388	1.18608	2.0304	4.16582	1.46298	1.54795	11.9048	1.24879	4.18839	1.64027	1.60862	bmpr1ba_368017	3.09479	2.17152
bmpr1ba	0.720117	1.51621	10.983	44.9537	0	42.5209	38.4857	99.5929	0	1.47293	61.1766	27.402	-1.80109	1.35032	0.18226	0.279519	chr5	7345285	7345604	chr5:7345285-7345604	320	*	Distal Intergenic	Distal Intergenic	5	7488064	7712160	224097	2	30742	NM_131457	366556	ENSDARG00000104100	bone morphogenetic protein receptor, type IBa	34.4103	5.41939	16.6051	6.0912	5.83215	4.38895	1.54795	10.2041	1.24879	4.78673	12.302	9.65175	bmpr1ba_366556	10.5624	6.99732
bmpr1ba	0.720117	1.51621	10.983	44.9537	0	42.5209	38.4857	99.5929	0	1.47293	61.1766	27.402	-1.80109	1.35032	0.18226	0.279519	chr5	7354088	7354335	chr5:7354088-7354335	248	*	Distal Intergenic	Distal Intergenic	5	7488064	7712160	224097	2	30742	NM_131457	357825	ENSDARG00000104100	bone morphogenetic protein receptor, type IBa	1.37641	3.25164	1.18608	7.10641	9.1648	7.31492	7.73974	8.50344	8.74155	10.7701	14.7624	11.2604	bmpr1ba_357825	5.70543	11.3836
bmpr1ba	0.720117	1.51621	10.983	44.9537	0	42.5209	38.4857	99.5929	0	1.47293	61.1766	27.402	-1.80109	1.35032	0.18226	0.279519	chr5	7363780	7364303	chr5:7363780-7364303	524	*	Distal Intergenic	Distal Intergenic	5	7488064	7712160	224097	2	30742	NM_131457	347857	ENSDARG00000104100	bone morphogenetic protein receptor, type IBa	23.399	18.4259	91.3281	90.3529	50.823	30.7227	23.2192	22.1089	3.74638	12.8643	9.02149	8.04312	bmpr1ba_347857	43.7975	8.41883
bmpr1ba	0.720117	1.51621	10.983	44.9537	0	42.5209	38.4857	99.5929	0	1.47293	61.1766	27.402	-1.80109	1.35032	0.18226	0.279519	chr5	7370854	7370983	chr5:7370854-7370983	130	*	Distal Intergenic	Distal Intergenic	5	7488064	7712160	224097	2	30742	NM_131457	341177	ENSDARG00000104100	bone morphogenetic protein receptor, type IBa	1.37641	3.25164	1.18608	1.0152	7.49848	4.38895	4.64384	8.50344	8.74155	8.67595	4.10068	17.6949	bmpr1ba_341177	3.98301	9.80326
bmpr1ba	0.720117	1.51621	10.983	44.9537	0	42.5209	38.4857	99.5929	0	1.47293	61.1766	27.402	-1.80109	1.35032	0.18226	0.279519	chr5	7379666	7379792	chr5:7379666-7379792	127	*	Distal Intergenic	Distal Intergenic	5	7488064	7712160	224097	2	30742	NM_131457	332368	ENSDARG00000104100	bone morphogenetic protein receptor, type IBa	1.37641	5.41939	3.55824	5.076	0.833164	4.38895	4.64384	11.9048	3.74638	9.87263	9.02149	8.04312	bmpr1ba_332368	4.6501	7.67091
bmpr1ba	0.720117	1.51621	10.983	44.9537	0	42.5209	38.4857	99.5929	0	1.47293	61.1766	27.402	-1.80109	1.35032	0.18226	0.279519	chr5	7386493	7386695	chr5:7386493-7386695	203	*	Distal Intergenic	Distal Intergenic	5	7488064	7712160	224097	2	30742	NM_131457	325465	ENSDARG00000104100	bone morphogenetic protein receptor, type IBa	4.12924	1.08388	2.37216	4.0608	9.1648	7.31492	9.28769	13.6055	2.49759	6.28258	7.38122	9.65175	bmpr1ba_325465	6.37737	6.45328
bmpr1ba	0.720117	1.51621	10.983	44.9537	0	42.5209	38.4857	99.5929	0	1.47293	61.1766	27.402	-1.80109	1.35032	0.18226	0.279519	chr5	7396879	7397077	chr5:7396879-7397077	199	*	Distal Intergenic	Distal Intergenic	5	7488064	7712160	224097	2	30742	NM_131457	315083	ENSDARG00000104100	bone morphogenetic protein receptor, type IBa	15.1405	5.41939	5.9304	7.10641	9.1648	10.2409	9.28769	5.10206	21.2295	7.47927	7.38122	22.5207	bmpr1ba_315083	8.42402	14.6527
bmpr1ba	0.720117	1.51621	10.983	44.9537	0	42.5209	38.4857	99.5929	0	1.47293	61.1766	27.402	-1.80109	1.35032	0.18226	0.279519	chr5	7410892	7411109	chr5:7410892-7411109	218	*	Distal Intergenic	Distal Intergenic	5	7488064	7712160	224097	2	30742	NM_131457	301051	ENSDARG00000104100	bone morphogenetic protein receptor, type IBa	4.12924	6.50327	2.37216	1.0152	1.66633	4.38895	4.64384	10.2041	4.99517	8.37678	16.4027	4.82587	bmpr1ba_301051	4.36539	8.65013
bmpr1ba	0.720117	1.51621	10.983	44.9537	0	42.5209	38.4857	99.5929	0	1.47293	61.1766	27.402	-1.80109	1.35032	0.18226	0.279519	chr5	7413330	7413539	chr5:7413330-7413539	210	*	Distal Intergenic	Distal Intergenic	5	7488064	7712160	224097	2	30742	NM_131457	298621	ENSDARG00000104100	bone morphogenetic protein receptor, type IBa	1.37641	1.08388	1.18608	4.0608	4.16582	19.0188	4.64384	1.70069	4.99517	4.18839	10.6618	9.65175	bmpr1ba_298621	4.65454	7.37427
bmpr1ba	0.720117	1.51621	10.983	44.9537	0	42.5209	38.4857	99.5929	0	1.47293	61.1766	27.402	-1.80109	1.35032	0.18226	0.279519	chr5	7418553	7418848	chr5:7418553-7418848	296	*	Distal Intergenic	Distal Intergenic	5	7488064	7712160	224097	2	30742	NM_131457	293312	ENSDARG00000104100	bone morphogenetic protein receptor, type IBa	4.12924	3.25164	18.9773	11.1672	13.3306	5.85194	1.54795	1.70069	14.9855	7.77844	5.74095	3.21725	bmpr1ba_293312	7.49457	7.93054
bmpr1ba	0.720117	1.51621	10.983	44.9537	0	42.5209	38.4857	99.5929	0	1.47293	61.1766	27.402	-1.80109	1.35032	0.18226	0.279519	chr5	7427707	7427845	chr5:7427707-7427845	139	*	Distal Intergenic	Distal Intergenic	5	7488064	7712160	224097	2	30742	NM_131457	284315	ENSDARG00000104100	bone morphogenetic protein receptor, type IBa	4.12924	5.41939	14.233	8.12161	14.1638	7.31492	4.64384	3.40138	3.74638	4.48756	1.64027	1.60862	bmpr1ba_284315	7.67839	2.87071
bmpr1ba	0.720117	1.51621	10.983	44.9537	0	42.5209	38.4857	99.5929	0	1.47293	61.1766	27.402	-1.80109	1.35032	0.18226	0.279519	chr5	7434148	7434401	chr5:7434148-7434401	254	*	Distal Intergenic	Distal Intergenic	5	7488064	7712160	224097	2	30742	NM_131457	277759	ENSDARG00000104100	bone morphogenetic protein receptor, type IBa	1.37641	9.75491	10.6747	5.076	6.66531	19.0188	1.54795	22.1089	3.74638	9.87263	9.02149	1.60862	bmpr1ba_277759	9.52788	6.06228
bmpr1ba	0.720117	1.51621	10.983	44.9537	0	42.5209	38.4857	99.5929	0	1.47293	61.1766	27.402	-1.80109	1.35032	0.18226	0.279519	chr5	7435024	7435384	chr5:7435024-7435384	361	*	Distal Intergenic	Distal Intergenic	5	7488064	7712160	224097	2	30742	NM_131457	276776	ENSDARG00000104100	bone morphogenetic protein receptor, type IBa	1.37641	1.08388	10.6747	9.13681	6.66531	4.38895	17.0274	8.50344	8.74155	14.6594	11.4819	17.6949	bmpr1ba_276776	7.35712	13.1444
bmpr1ba	0.720117	1.51621	10.983	44.9537	0	42.5209	38.4857	99.5929	0	1.47293	61.1766	27.402	-1.80109	1.35032	0.18226	0.279519	chr5	7443905	7444323	chr5:7443905-7444323	419	*	Distal Intergenic	Distal Intergenic	5	7488064	7712160	224097	2	30742	NM_131457	267837	ENSDARG00000104100	bone morphogenetic protein receptor, type IBa	15.1405	5.41939	24.9077	11.1672	7.49848	1.46298	4.64384	8.50344	3.74638	14.6594	6.56108	12.869	bmpr1ba_267837	9.84294	9.45896
bmpr1ba	0.720117	1.51621	10.983	44.9537	0	42.5209	38.4857	99.5929	0	1.47293	61.1766	27.402	-1.80109	1.35032	0.18226	0.279519	chr5	7455607	7455786	chr5:7455607-7455786	180	*	Distal Intergenic	Distal Intergenic	5	7488064	7712160	224097	2	30742	NM_131457	256374	ENSDARG00000104100	bone morphogenetic protein receptor, type IBa	4.12924	1.08388	5.9304	9.13681	7.49848	1.46298	17.0274	11.9048	3.74638	6.28258	6.56108	20.9121	bmpr1ba_256374	7.27175	9.37554
bmpr1ba	0.720117	1.51621	10.983	44.9537	0	42.5209	38.4857	99.5929	0	1.47293	61.1766	27.402	-1.80109	1.35032	0.18226	0.279519	chr5	7457571	7457883	chr5:7457571-7457883	313	*	Distal Intergenic	Distal Intergenic	5	7488064	7712160	224097	2	30742	NM_131457	254277	ENSDARG00000104100	bone morphogenetic protein receptor, type IBa	4.12924	3.25164	8.30256	5.076	4.16582	13.1669	10.8356	15.3062	1.24879	5.68424	18.8631	14.4776	bmpr1ba_254277	8.02924	10.0684
bmpr1ba	0.720117	1.51621	10.983	44.9537	0	42.5209	38.4857	99.5929	0	1.47293	61.1766	27.402	-1.80109	1.35032	0.18226	0.279519	chr5	7459151	7459269	chr5:7459151-7459269	119	*	Distal Intergenic	Distal Intergenic	5	7488064	7712160	224097	2	30742	NM_131457	252891	ENSDARG00000104100	bone morphogenetic protein receptor, type IBa	1.37641	3.25164	1.18608	1.0152	0.833164	1.46298	1.54795	10.2041	13.7367	2.99171	4.10068	4.82587	bmpr1ba_252891	2.60969	6.41375
bmpr1ba	0.720117	1.51621	10.983	44.9537	0	42.5209	38.4857	99.5929	0	1.47293	61.1766	27.402	-1.80109	1.35032	0.18226	0.279519	chr5	7460579	7460999	chr5:7460579-7460999	421	*	Distal Intergenic	Distal Intergenic	5	7488064	7712160	224097	2	30742	NM_131457	251161	ENSDARG00000104100	bone morphogenetic protein receptor, type IBa	6.88206	3.25164	8.30256	23.3496	11.6643	10.2409	13.9315	11.9048	6.24397	12.266	5.74095	8.04312	bmpr1ba_251161	11.1909	8.07351
bmpr1ba	0.720117	1.51621	10.983	44.9537	0	42.5209	38.4857	99.5929	0	1.47293	61.1766	27.402	-1.80109	1.35032	0.18226	0.279519	chr5	7466950	7467074	chr5:7466950-7467074	125	*	Distal Intergenic	Distal Intergenic	5	7488064	7712160	224097	2	30742	NM_131457	245086	ENSDARG00000104100	bone morphogenetic protein receptor, type IBa	1.37641	3.25164	5.9304	13.1976	2.49949	7.31492	7.73974	11.9048	8.74155	14.061	8.20135	3.21725	bmpr1ba_245086	6.65188	8.55529
bmpr1ba	0.720117	1.51621	10.983	44.9537	0	42.5209	38.4857	99.5929	0	1.47293	61.1766	27.402	-1.80109	1.35032	0.18226	0.279519	chr5	7469777	7469971	chr5:7469777-7469971	195	*	Distal Intergenic	Distal Intergenic	5	7488064	7712160	224097	2	30742	NM_131457	242189	ENSDARG00000104100	bone morphogenetic protein receptor, type IBa	1.37641	3.25164	3.55824	3.0456	2.49949	1.46298	4.64384	15.3062	6.24397	10.471	5.74095	11.2604	bmpr1ba_242189	4.39305	8.42906
bmpr1ba	0.720117	1.51621	10.983	44.9537	0	42.5209	38.4857	99.5929	0	1.47293	61.1766	27.402	-1.80109	1.35032	0.18226	0.279519	chr5	7477262	7477515	chr5:7477262-7477515	254	*	Distal Intergenic	Distal Intergenic	5	7488064	7712160	224097	2	30742	NM_131457	234645	ENSDARG00000104100	bone morphogenetic protein receptor, type IBa	4.12924	2.16776	13.0469	6.0912	4.99898	2.92597	9.28769	11.9048	8.74155	8.07761	16.4027	11.2604	bmpr1ba_234645	6.81907	11.1206
bmpr1ba	0.720117	1.51621	10.983	44.9537	0	42.5209	38.4857	99.5929	0	1.47293	61.1766	27.402	-1.80109	1.35032	0.18226	0.279519	chr5	7498639	7498850	chr5:7498639-7498850	212	*	Exon (NM_131457/30742, exon 12 of 14)	Exon	5	7488064	7712160	224097	2	30742	NM_131457	213310	ENSDARG00000104100	bone morphogenetic protein receptor, type IBa	1.37641	1.08388	5.9304	7.10641	5.83215	4.38895	10.8356	18.7076	7.49276	6.28258	9.02149	1.60862	bmpr1ba_213310	6.90767	6.10136
bmpr1ba	0.720117	1.51621	10.983	44.9537	0	42.5209	38.4857	99.5929	0	1.47293	61.1766	27.402	-1.80109	1.35032	0.18226	0.279519	chr5	7510326	7510615	chr5:7510326-7510615	290	*	Exon (NM_131457/30742, exon 6 of 14)	Exon	5	7488064	7712160	224097	2	30742	NM_131457	201545	ENSDARG00000104100	bone morphogenetic protein receptor, type IBa	17.8934	17.3421	34.3963	27.4104	32.4934	33.6487	23.2192	8.50344	8.74155	5.0859	4.10068	11.2604	bmpr1ba_201545	24.3634	7.29713
bmpr1ba	0.720117	1.51621	10.983	44.9537	0	42.5209	38.4857	99.5929	0	1.47293	61.1766	27.402	-1.80109	1.35032	0.18226	0.279519	chr5	7520114	7520693	chr5:7520114-7520693	580	*	Intron (NM_131457/30742, intron 4 of 13)	Intron	5	7488064	7712160	224097	2	30742	NM_131457	191467	ENSDARG00000104100	bone morphogenetic protein receptor, type IBa	4.12924	7.58715	8.30256	10.152	12.4975	23.4078	7.73974	17.0069	11.2391	17.6511	22.9638	19.3035	bmpr1ba_191467	11.3528	17.7894
bmpr1ba	0.720117	1.51621	10.983	44.9537	0	42.5209	38.4857	99.5929	0	1.47293	61.1766	27.402	-1.80109	1.35032	0.18226	0.279519	chr5	7529861	7529979	chr5:7529861-7529979	119	*	Intron (NM_131457/30742, intron 4 of 13)	Intron	5	7488064	7712160	224097	2	30742	NM_131457	182181	ENSDARG00000104100	bone morphogenetic protein receptor, type IBa	1.37641	3.25164	3.55824	1.0152	4.16582	4.38895	7.73974	11.9048	11.2391	6.28258	0.820135	4.82587	bmpr1ba_182181	4.6751	5.79193
bmpr1ba	0.720117	1.51621	10.983	44.9537	0	42.5209	38.4857	99.5929	0	1.47293	61.1766	27.402	-1.80109	1.35032	0.18226	0.279519	chr5	7544424	7544647	chr5:7544424-7544647	224	*	Intron (NM_131457/30742, intron 4 of 13)	Intron	5	7488064	7712160	224097	2	30742	NM_131457	167513	ENSDARG00000104100	bone morphogenetic protein receptor, type IBa	9.63489	1.08388	1.18608	5.076	7.49848	4.38895	3.0959	1.70069	1.24879	5.68424	1.64027	4.82587	bmpr1ba_167513	4.20811	3.3498
bmpr1ba	0.720117	1.51621	10.983	44.9537	0	42.5209	38.4857	99.5929	0	1.47293	61.1766	27.402	-1.80109	1.35032	0.18226	0.279519	chr5	7545034	7545274	chr5:7545034-7545274	241	*	Intron (NM_131457/30742, intron 4 of 13)	Intron	5	7488064	7712160	224097	2	30742	NM_131457	166886	ENSDARG00000104100	bone morphogenetic protein receptor, type IBa	23.399	7.58715	10.6747	4.0608	4.99898	7.31492	1.54795	1.70069	9.99034	2.99171	9.02149	14.4776	bmpr1ba_166886	7.66053	9.12029
bmpr1ba	0.720117	1.51621	10.983	44.9537	0	42.5209	38.4857	99.5929	0	1.47293	61.1766	27.402	-1.80109	1.35032	0.18226	0.279519	chr5	7551288	7551420	chr5:7551288-7551420	133	*	Intron (NM_131457/30742, intron 4 of 13)	Intron	5	7488064	7712160	224097	2	30742	NM_131457	160740	ENSDARG00000104100	bone morphogenetic protein receptor, type IBa	4.12924	3.25164	5.9304	7.10641	0.833164	10.2409	7.73974	1.70069	11.2391	6.28258	5.74095	8.04312	bmpr1ba_160740	5.11652	7.82645
bmpr1ba	0.720117	1.51621	10.983	44.9537	0	42.5209	38.4857	99.5929	0	1.47293	61.1766	27.402	-1.80109	1.35032	0.18226	0.279519	chr5	7554135	7554344	chr5:7554135-7554344	210	*	Intron (NM_131457/30742, intron 4 of 13)	Intron	5	7488064	7712160	224097	2	30742	NM_131457	157816	ENSDARG00000104100	bone morphogenetic protein receptor, type IBa	1.37641	9.75491	3.55824	13.1976	5.83215	1.46298	1.54795	5.10206	11.2391	5.0859	4.92081	3.21725	bmpr1ba_157816	5.22904	6.11577
bmpr1ba	0.720117	1.51621	10.983	44.9537	0	42.5209	38.4857	99.5929	0	1.47293	61.1766	27.402	-1.80109	1.35032	0.18226	0.279519	chr5	7570983	7571102	chr5:7570983-7571102	120	*	Intron (NM_131457/30742, intron 4 of 13)	Intron	5	7488064	7712160	224097	2	30742	NM_131457	141058	ENSDARG00000104100	bone morphogenetic protein receptor, type IBa	1.37641	1.08388	1.18608	1.0152	0.833164	1.46298	1.54795	1.70069	8.74155	5.0859	10.6618	1.60862	bmpr1ba_141058	1.27579	6.52446
bmpr1ba	0.720117	1.51621	10.983	44.9537	0	42.5209	38.4857	99.5929	0	1.47293	61.1766	27.402	-1.80109	1.35032	0.18226	0.279519	chr5	7575247	7575365	chr5:7575247-7575365	119	*	Intron (NM_131457/30742, intron 4 of 13)	Intron	5	7488064	7712160	224097	2	30742	NM_131457	136795	ENSDARG00000104100	bone morphogenetic protein receptor, type IBa	15.1405	9.75491	1.18608	1.0152	0.833164	1.46298	1.54795	1.70069	38.7126	1.49585	7.38122	8.04312	bmpr1ba_136795	4.08019	13.9082
bmpr1ba	0.720117	1.51621	10.983	44.9537	0	42.5209	38.4857	99.5929	0	1.47293	61.1766	27.402	-1.80109	1.35032	0.18226	0.279519	chr5	7593292	7593515	chr5:7593292-7593515	224	*	Intron (NM_131457/30742, intron 4 of 13)	Intron	5	7488064	7712160	224097	2	30742	NM_131457	118645	ENSDARG00000104100	bone morphogenetic protein receptor, type IBa	6.88206	5.41939	13.0469	11.1672	4.99898	7.31492	10.8356	8.50344	11.2391	5.98341	4.10068	3.21725	bmpr1ba_118645	8.52107	6.13512
bmpr1ba	0.720117	1.51621	10.983	44.9537	0	42.5209	38.4857	99.5929	0	1.47293	61.1766	27.402	-1.80109	1.35032	0.18226	0.279519	chr5	7609303	7609477	chr5:7609303-7609477	175	*	Intron (NM_131457/30742, intron 4 of 13)	Intron	5	7488064	7712160	224097	2	30742	NM_131457	102683	ENSDARG00000104100	bone morphogenetic protein receptor, type IBa	12.3877	20.5937	20.1634	9.13681	10.8311	16.0928	17.0274	1.70069	18.7319	18.2494	28.7047	30.5639	bmpr1ba_102683	13.4917	24.0625
bmpr1ba	0.720117	1.51621	10.983	44.9537	0	42.5209	38.4857	99.5929	0	1.47293	61.1766	27.402	-1.80109	1.35032	0.18226	0.279519	chr5	7613556	7613680	chr5:7613556-7613680	125	*	Intron (NM_131457/30742, intron 4 of 13)	Intron	5	7488064	7712160	224097	2	30742	NM_131457	98480	ENSDARG00000104100	bone morphogenetic protein receptor, type IBa	5.50565	5.41939	4.74432	1.0152	9.1648	1.46298	1.54795	5.10206	3.74638	5.0859	5.74095	4.82587	bmpr1ba_98480	4.2453	4.84978
bmpr1ba	0.720117	1.51621	10.983	44.9537	0	42.5209	38.4857	99.5929	0	1.47293	61.1766	27.402	-1.80109	1.35032	0.18226	0.279519	chr5	7621902	7622044	chr5:7621902-7622044	143	*	Intron (NM_131457/30742, intron 4 of 13)	Intron	5	7488064	7712160	224097	2	30742	NM_131457	90116	ENSDARG00000104100	bone morphogenetic protein receptor, type IBa	1.37641	1.08388	1.18608	4.0608	4.16582	1.46298	6.19179	1.70069	7.49276	4.78673	10.6618	1.60862	bmpr1ba_90116	2.65356	6.13747
bmpr1ba	0.720117	1.51621	10.983	44.9537	0	42.5209	38.4857	99.5929	0	1.47293	61.1766	27.402	-1.80109	1.35032	0.18226	0.279519	chr5	7627981	7628449	chr5:7627981-7628449	469	*	Intron (NM_131457/30742, intron 4 of 13)	Intron	5	7488064	7712160	224097	2	30742	NM_131457	83711	ENSDARG00000104100	bone morphogenetic protein receptor, type IBa	48.1744	35.768	5.9304	24.3648	12.4975	8.77791	13.9315	17.0069	28.7222	18.5486	36.0859	72.3881	bmpr1ba_83711	20.8064	38.9362
bmpr1ba	0.720117	1.51621	10.983	44.9537	0	42.5209	38.4857	99.5929	0	1.47293	61.1766	27.402	-1.80109	1.35032	0.18226	0.279519	chr5	7642615	7643086	chr5:7642615-7643086	472	*	5' UTR	5' UTR	5	7488064	7712160	224097	2	30742	NM_131457	69074	ENSDARG00000104100	bone morphogenetic protein receptor, type IBa	45.4216	37.9357	42.6989	169.539	91.648	138.984	68.1097	32.3131	16.2343	14.061	20.5034	17.6949	bmpr1ba_69074	78.3311	17.1234
bmpr1ba	0.720117	1.51621	10.983	44.9537	0	42.5209	38.4857	99.5929	0	1.47293	61.1766	27.402	-1.80109	1.35032	0.18226	0.279519	chr5	7649445	7649563	chr5:7649445-7649563	119	*	Intron (NM_131457/30742, intron 3 of 13)	Intron	5	7488064	7712160	224097	2	30742	NM_131457	62597	ENSDARG00000104100	bone morphogenetic protein receptor, type IBa	1.37641	1.08388	3.55824	3.0456	2.49949	1.46298	4.64384	1.70069	9.99034	4.48756	5.74095	19.3035	bmpr1ba_62597	2.42139	9.88059
bmpr1ba	0.720117	1.51621	10.983	44.9537	0	42.5209	38.4857	99.5929	0	1.47293	61.1766	27.402	-1.80109	1.35032	0.18226	0.279519	chr5	7649822	7650086	chr5:7649822-7650086	265	*	Intron (NM_131457/30742, intron 3 of 13)	Intron	5	7488064	7712160	224097	2	30742	NM_131457	62074	ENSDARG00000104100	bone morphogenetic protein receptor, type IBa	6.88206	6.50327	3.55824	8.12161	16.6633	1.46298	9.28769	1.70069	4.99517	9.87263	15.5826	11.2604	bmpr1ba_62074	6.77248	10.4277
bmpr1ba	0.720117	1.51621	10.983	44.9537	0	42.5209	38.4857	99.5929	0	1.47293	61.1766	27.402	-1.80109	1.35032	0.18226	0.279519	chr5	7658483	7658710	chr5:7658483-7658710	228	*	Intron (NM_131457/30742, intron 3 of 13)	Intron	5	7488064	7712160	224097	2	30742	NM_131457	53450	ENSDARG00000104100	bone morphogenetic protein receptor, type IBa	1.37641	3.25164	1.18608	12.1824	10.8311	7.31492	3.0959	10.2041	1.24879	6.88093	16.4027	11.2604	bmpr1ba_53450	6.18033	8.9482
bmpr1ba	0.720117	1.51621	10.983	44.9537	0	42.5209	38.4857	99.5929	0	1.47293	61.1766	27.402	-1.80109	1.35032	0.18226	0.279519	chr5	7665924	7666149	chr5:7665924-7666149	226	*	5' UTR	5' UTR	5	7488064	7712160	224097	2	30742	NM_131457	46011	ENSDARG00000104100	bone morphogenetic protein receptor, type IBa	1.37641	6.50327	5.9304	5.076	2.49949	5.85194	3.0959	18.7076	8.74155	5.0859	7.38122	25.738	bmpr1ba_46011	6.13012	11.7367
bmpr1ba	0.720117	1.51621	10.983	44.9537	0	42.5209	38.4857	99.5929	0	1.47293	61.1766	27.402	-1.80109	1.35032	0.18226	0.279519	chr5	7668501	7668663	chr5:7668501-7668663	163	*	Intron (NM_131457/30742, intron 2 of 13)	Intron	5	7488064	7712160	224097	2	30742	NM_131457	43497	ENSDARG00000104100	bone morphogenetic protein receptor, type IBa	1.37641	3.25164	8.30256	1.0152	14.1638	4.38895	13.9315	1.70069	3.74638	2.09419	4.10068	4.82587	bmpr1ba_43497	6.01635	3.69178
bmpr1ba	0.720117	1.51621	10.983	44.9537	0	42.5209	38.4857	99.5929	0	1.47293	61.1766	27.402	-1.80109	1.35032	0.18226	0.279519	chr5	7689219	7689691	chr5:7689219-7689691	473	*	Intron (NM_131457/30742, intron 2 of 13)	Intron	5	7488064	7712160	224097	2	30742	NM_131457	22469	ENSDARG00000104100	bone morphogenetic protein receptor, type IBa	5.50565	5.41939	2.37216	15.228	6.66531	10.2409	7.73974	8.50344	13.7367	18.2494	5.74095	17.6949	bmpr1ba_22469	7.70932	13.8555
bmpr1ba	0.720117	1.51621	10.983	44.9537	0	42.5209	38.4857	99.5929	0	1.47293	61.1766	27.402	-1.80109	1.35032	0.18226	0.279519	chr5	7691865	7691965	chr5:7691865-7691965	101	*	5' UTR	5' UTR	5	7488064	7712160	224097	2	30742	NM_131457	20195	ENSDARG00000104100	bone morphogenetic protein receptor, type IBa	1.37641	3.25164	1.18608	8.12161	5.83215	10.2409	3.0959	6.80275	3.74638	3.29088	4.92081	8.04312	bmpr1ba_20195	4.98843	5.0003
bmpr1ba	0.720117	1.51621	10.983	44.9537	0	42.5209	38.4857	99.5929	0	1.47293	61.1766	27.402	-1.80109	1.35032	0.18226	0.279519	chr5	7696373	7696733	chr5:7696373-7696733	361	*	Intron (NM_131457/30742, intron 1 of 13)	Intron	5	7488064	7712160	224097	2	30742	NM_131457	15427	ENSDARG00000104100	bone morphogenetic protein receptor, type IBa	15.1405	1.08388	15.419	11.1672	19.9959	11.7039	15.4795	1.70069	18.7319	9.27429	4.92081	12.869	bmpr1ba_15427	11.4613	11.449
bmpr1ba	0.720117	1.51621	10.983	44.9537	0	42.5209	38.4857	99.5929	0	1.47293	61.1766	27.402	-1.80109	1.35032	0.18226	0.279519	chr5	7712085	7712350	chr5:7712085-7712350	266	*	Promoter (<=1kb)	Promoter	5	7488064	7712160	224097	2	30742	NM_131457	0	ENSDARG00000104100	bone morphogenetic protein receptor, type IBa	11.0113	9.75491	33.2102	23.3496	12.4975	13.1669	17.0274	22.1089	38.7126	14.6594	16.4027	35.3897	bmpr1ba_0	17.7658	26.2911
bmpr1bb	17.2828	10.6135	28.144	37.4614	21.6907	119.59	28.5894	81.8875	76.8331	139.929	88.0944	59.1014	-1.94762	0.472605	3.77171e-05	0.00016972	chr10	1109851	1110074	chr10:1109851-1110074	224	*	3' UTR	3' UTR	10	1082961	1180467	97507	2	100149664	NM_001145996	70393	ENSDARG00000102742	bone morphogenetic protein receptor, type IBb	6.88206	1.08388	1.18608	9.13681	14.997	1.46298	15.4795	11.9048	3.74638	7.1801	2.46041	4.82587	bmpr1bb_70393	7.76663	4.55319
bmpr1bb	17.2828	10.6135	28.144	37.4614	21.6907	119.59	28.5894	81.8875	76.8331	139.929	88.0944	59.1014	-1.94762	0.472605	3.77171e-05	0.00016972	chr10	1112001	1112170	chr10:1112001-1112170	170	*	Exon (NM_001145996/100149664, exon 7 of 13)	Exon	10	1082961	1180467	97507	2	100149664	NM_001145996	68297	ENSDARG00000102742	bone morphogenetic protein receptor, type IBb	1.37641	3.25164	5.9304	1.0152	0.833164	1.46298	1.54795	15.3062	6.24397	7.47927	4.10068	4.82587	bmpr1bb_68297	3.84049	5.66245
bmpr1bb	17.2828	10.6135	28.144	37.4614	21.6907	119.59	28.5894	81.8875	76.8331	139.929	88.0944	59.1014	-1.94762	0.472605	3.77171e-05	0.00016972	chr10	1113669	1113954	chr10:1113669-1113954	286	*	Exon (NM_001145996/100149664, exon 5 of 13)	Exon	10	1082961	1180467	97507	2	100149664	NM_001145996	66513	ENSDARG00000102742	bone morphogenetic protein receptor, type IBb	4.12924	5.41939	8.30256	3.0456	7.49848	1.46298	1.54795	32.3131	11.2391	12.266	8.20135	17.6949	bmpr1bb_66513	7.96491	12.3503
bmpr1bb	17.2828	10.6135	28.144	37.4614	21.6907	119.59	28.5894	81.8875	76.8331	139.929	88.0944	59.1014	-1.94762	0.472605	3.77171e-05	0.00016972	chr10	1120233	1120553	chr10:1120233-1120553	321	*	Intron (NM_001145996/100149664, intron 4 of 12)	Intron	10	1082961	1180467	97507	2	100149664	NM_001145996	59914	ENSDARG00000102742	bone morphogenetic protein receptor, type IBb	41.2924	11.9227	62.8622	23.3496	72.4853	13.1669	20.1233	10.2041	3.74638	6.58176	6.56108	8.04312	bmpr1bb_59914	31.9258	6.23308
bmpr1bb	17.2828	10.6135	28.144	37.4614	21.6907	119.59	28.5894	81.8875	76.8331	139.929	88.0944	59.1014	-1.94762	0.472605	3.77171e-05	0.00016972	chr10	1122622	1122953	chr10:1122622-1122953	332	*	Intron (NM_001145996/100149664, intron 4 of 12)	Intron	10	1082961	1180467	97507	2	100149664	NM_001145996	57514	ENSDARG00000102742	bone morphogenetic protein receptor, type IBb	26.1518	14.0904	88.956	166.493	153.302	51.2045	88.233	11.9048	6.24397	3.29088	9.02149	11.2604	bmpr1bb_57514	75.042	7.45418
bmpr1bb	17.2828	10.6135	28.144	37.4614	21.6907	119.59	28.5894	81.8875	76.8331	139.929	88.0944	59.1014	-1.94762	0.472605	3.77171e-05	0.00016972	chr10	1133005	1133533	chr10:1133005-1133533	529	*	5' UTR	5' UTR	10	1082961	1180467	97507	2	100149664	NM_001145996	46934	ENSDARG00000102742	bone morphogenetic protein receptor, type IBb	23.399	14.0904	39.1406	127.915	77.4843	59.9824	72.7536	32.3131	11.2391	13.4627	7.38122	24.1294	bmpr1bb_46934	55.8848	14.0531
bmpr1bb	17.2828	10.6135	28.144	37.4614	21.6907	119.59	28.5894	81.8875	76.8331	139.929	88.0944	59.1014	-1.94762	0.472605	3.77171e-05	0.00016972	chr10	1135817	1136178	chr10:1135817-1136178	362	*	Intron (NM_001145996/100149664, intron 3 of 12)	Intron	10	1082961	1180467	97507	2	100149664	NM_001145996	44289	ENSDARG00000102742	bone morphogenetic protein receptor, type IBb	1.37641	4.33551	1.18608	3.0456	9.1648	1.46298	1.54795	15.3062	8.74155	12.266	11.4819	11.2604	bmpr1bb_44289	4.67819	10.9375
bmpr1bb	17.2828	10.6135	28.144	37.4614	21.6907	119.59	28.5894	81.8875	76.8331	139.929	88.0944	59.1014	-1.94762	0.472605	3.77171e-05	0.00016972	chr10	1137522	1137816	chr10:1137522-1137816	295	*	Intron (NM_001145996/100149664, intron 3 of 12)	Intron	10	1082961	1180467	97507	2	100149664	NM_001145996	42651	ENSDARG00000102742	bone morphogenetic protein receptor, type IBb	13.7641	2.16776	10.6747	21.3192	39.9919	13.1669	13.9315	22.1089	13.7367	10.471	5.74095	4.82587	bmpr1bb_42651	17.1406	8.69363
bmpr1bb	17.2828	10.6135	28.144	37.4614	21.6907	119.59	28.5894	81.8875	76.8331	139.929	88.0944	59.1014	-1.94762	0.472605	3.77171e-05	0.00016972	chr10	1142525	1142673	chr10:1142525-1142673	149	*	Intron (NM_001145996/100149664, intron 3 of 12)	Intron	10	1082961	1180467	97507	2	100149664	NM_001145996	37794	ENSDARG00000102742	bone morphogenetic protein receptor, type IBb	1.37641	1.08388	3.55824	1.0152	2.49949	1.46298	3.0959	22.1089	1.24879	2.99171	0.820135	14.4776	bmpr1bb_37794	4.52513	4.88456
bmpr1bb	17.2828	10.6135	28.144	37.4614	21.6907	119.59	28.5894	81.8875	76.8331	139.929	88.0944	59.1014	-1.94762	0.472605	3.77171e-05	0.00016972	chr10	1145423	1145544	chr10:1145423-1145544	122	*	Intron (NM_001145996/100149664, intron 3 of 12)	Intron	10	1082961	1180467	97507	2	100149664	NM_001145996	34923	ENSDARG00000102742	bone morphogenetic protein receptor, type IBb	1.37641	1.08388	1.18608	1.0152	0.833164	1.46298	6.19179	11.9048	1.24879	4.48756	3.28054	1.60862	bmpr1bb_34923	3.13179	2.65638
bmpr1bb	17.2828	10.6135	28.144	37.4614	21.6907	119.59	28.5894	81.8875	76.8331	139.929	88.0944	59.1014	-1.94762	0.472605	3.77171e-05	0.00016972	chr10	1161335	1161501	chr10:1161335-1161501	167	*	Intron (NM_001145996/100149664, intron 2 of 12)	Intron	10	1082961	1180467	97507	2	100149664	NM_001145996	18966	ENSDARG00000102742	bone morphogenetic protein receptor, type IBb	13.7641	6.50327	7.11648	13.1976	17.4964	4.38895	6.19179	1.70069	6.24397	6.28258	4.92081	1.60862	bmpr1bb_18966	8.79492	4.764
bmpr1bb	17.2828	10.6135	28.144	37.4614	21.6907	119.59	28.5894	81.8875	76.8331	139.929	88.0944	59.1014	-1.94762	0.472605	3.77171e-05	0.00016972	chr10	1162983	1163220	chr10:1162983-1163220	238	*	Intron (NM_001145996/100149664, intron 2 of 12)	Intron	10	1082961	1180467	97507	2	100149664	NM_001145996	17247	ENSDARG00000102742	bone morphogenetic protein receptor, type IBb	1.37641	14.0904	5.9304	7.10641	22.4954	10.2409	15.4795	15.3062	13.7367	8.67595	4.92081	1.60862	bmpr1bb_17247	11.5032	7.23553
bmpr1bb	17.2828	10.6135	28.144	37.4614	21.6907	119.59	28.5894	81.8875	76.8331	139.929	88.0944	59.1014	-1.94762	0.472605	3.77171e-05	0.00016972	chr10	1164170	1164358	chr10:1164170-1164358	189	*	Intron (NM_001145996/100149664, intron 2 of 12)	Intron	10	1082961	1180467	97507	2	100149664	NM_001145996	16109	ENSDARG00000102742	bone morphogenetic protein receptor, type IBb	20.6462	14.0904	27.2798	13.1976	14.997	35.1116	13.9315	25.5103	46.2053	22.1386	14.7624	27.3466	bmpr1bb_16109	20.5956	27.6133
bmpr1bb	17.2828	10.6135	28.144	37.4614	21.6907	119.59	28.5894	81.8875	76.8331	139.929	88.0944	59.1014	-1.94762	0.472605	3.77171e-05	0.00016972	chr10	1168761	1168936	chr10:1168761-1168936	176	*	Intron (NM_001145996/100149664, intron 2 of 12)	Intron	10	1082961	1180467	97507	2	100149664	NM_001145996	11531	ENSDARG00000102742	bone morphogenetic protein receptor, type IBb	1.37641	5.41939	4.74432	5.076	9.1648	1.46298	12.3836	8.50344	1.24879	5.98341	11.4819	3.21725	bmpr1bb_11531	6.01637	5.48284
bmpr1bb	17.2828	10.6135	28.144	37.4614	21.6907	119.59	28.5894	81.8875	76.8331	139.929	88.0944	59.1014	-1.94762	0.472605	3.77171e-05	0.00016972	chr10	1171037	1171218	chr10:1171037-1171218	182	*	Intron (NM_001145996/100149664, intron 2 of 12)	Intron	10	1082961	1180467	97507	2	100149664	NM_001145996	9249	ENSDARG00000102742	bone morphogenetic protein receptor, type IBb	4.12924	4.33551	10.6747	3.0456	28.3276	7.31492	13.9315	22.1089	4.99517	6.88093	4.10068	4.82587	bmpr1bb_9249	11.7335	5.20066
bmpr1bb	17.2828	10.6135	28.144	37.4614	21.6907	119.59	28.5894	81.8875	76.8331	139.929	88.0944	59.1014	-1.94762	0.472605	3.77171e-05	0.00016972	chr10	1173266	1173825	chr10:1173266-1173825	560	*	Intron (NM_001145996/100149664, intron 2 of 12)	Intron	10	1082961	1180467	97507	2	100149664	NM_001145996	6642	ENSDARG00000102742	bone morphogenetic protein receptor, type IBb	45.4216	42.2713	94.8864	106.596	355.761	103.872	75.8495	146.259	17.4831	14.9585	19.6832	30.5639	bmpr1bb_6642	121.365	20.6722
bmpr1bb	17.2828	10.6135	28.144	37.4614	21.6907	119.59	28.5894	81.8875	76.8331	139.929	88.0944	59.1014	-1.94762	0.472605	3.77171e-05	0.00016972	chr10	1175688	1176021	chr10:1175688-1176021	334	*	Intron (NM_001145996/100149664, intron 2 of 12)	Intron	10	1082961	1180467	97507	2	100149664	NM_001145996	4446	ENSDARG00000102742	bone morphogenetic protein receptor, type IBb	9.63489	9.75491	14.233	16.2432	13.3306	13.1669	29.411	10.2041	13.7367	13.7619	18.043	12.869	bmpr1bb_4446	14.4973	14.6026
bmpr1bb	17.2828	10.6135	28.144	37.4614	21.6907	119.59	28.5894	81.8875	76.8331	139.929	88.0944	59.1014	-1.94762	0.472605	3.77171e-05	0.00016972	chr10	1180370	1180682	chr10:1180370-1180682	313	*	Promoter (<=1kb)	Promoter	10	1082961	1180467	97507	2	100149664	NM_001145996	0	ENSDARG00000102742	bone morphogenetic protein receptor, type IBb	6.88206	15.1743	16.6051	7.10641	17.4964	8.77791	10.8356	13.6055	4.99517	11.6677	20.5034	11.2604	bmpr1bb_0	12.0604	12.1066
bmpr1bb	17.2828	10.6135	28.144	37.4614	21.6907	119.59	28.5894	81.8875	76.8331	139.929	88.0944	59.1014	-1.94762	0.472605	3.77171e-05	0.00016972	chr10	1183280	1183614	chr10:1183280-1183614	335	*	Promoter (2-3kb)	Promoter	10	1082961	1180467	97507	2	100149664	NM_001145996	-2813	ENSDARG00000102742	bone morphogenetic protein receptor, type IBb	6.88206	8.67103	1.18608	3.0456	10.8311	1.46298	1.54795	15.3062	7.49276	6.88093	9.02149	14.4776	bmpr1bb_-2813	6.11663	9.4682
btbd6b	1065.05	1093.19	663.1	884.09	1088.48	139.522	440.936	524.522	576.248	720.265	376.848	688.386	1.05013	0.374317	0.00502436	0.0137161	chr20	20932707	20932857	chr20:20932707-20932857	151	*	Promoter (<=1kb)	Promoter	20	20927827	20932782	4956	2	553533	NM_001024815	0	ENSDARG00000032369	BTB (POZ) domain containing 6b	15.1405	18.4259	1.18608	1.0152	0.833164	17.5558	10.8356	15.3062	1.24879	2.99171	4.10068	4.82587	btbd6b_0	10.0373	3.29176
btbd6b	1065.05	1093.19	663.1	884.09	1088.48	139.522	440.936	524.522	576.248	720.265	376.848	688.386	1.05013	0.374317	0.00502436	0.0137161	chr20	21054001	21054174	chr20:21054001-21054174	174	*	Distal Intergenic	Distal Intergenic	20	20927827	20932782	4956	2	553533	NM_001024815	-121219	ENSDARG00000032369	BTB (POZ) domain containing 6b	4.12924	11.9227	24.9077	1.0152	2.49949	11.7039	4.64384	15.3062	1.24879	3.29088	0.820135	4.82587	btbd6b_-121219	9.51602	2.54642
calb2b	1.44023	0	4.80507	7.49229	9.2021	9.30145	17.5935	0	0	0	0	4.53042	0.0309938	1.79244	0.986204	0.990624	chr7	24673835	24674127	chr7:24673835-24674127	293	*	Distal Intergenic	Distal Intergenic	7	24681278	24699946	18669	2	393684	NM_200711	25819	ENSDARG00000036344	calbindin 2b	13.7641	11.9227	41.5128	9.13681	22.4954	10.2409	34.0549	57.8234	6.24397	11.3685	15.5826	12.869	calb2b_25819	25.1189	11.516
calb2b	1.44023	0	4.80507	7.49229	9.2021	9.30145	17.5935	0	0	0	0	4.53042	0.0309938	1.79244	0.986204	0.990624	chr7	24688536	24688663	chr7:24688536-24688663	128	*	Exon (NM_200711/393684, exon 8 of 11)	Exon	7	24681278	24699946	18669	2	393684	NM_200711	11283	ENSDARG00000036344	calbindin 2b	1.37641	1.08388	1.18608	1.0152	0.833164	1.46298	1.54795	3.40138	3.74638	4.18839	9.84162	1.60862	calb2b_11283	1.48838	4.84625
calb2b	1.44023	0	4.80507	7.49229	9.2021	9.30145	17.5935	0	0	0	0	4.53042	0.0309938	1.79244	0.986204	0.990624	chr7	24692116	24692338	chr7:24692116-24692338	223	*	Intron (NM_200711/393684, intron 3 of 10)	Intron	7	24681278	24699946	18669	2	393684	NM_200711	7608	ENSDARG00000036344	calbindin 2b	1.37641	5.41939	10.6747	1.0152	6.66531	1.46298	1.54795	23.8096	4.99517	5.98341	3.28054	14.4776	calb2b_7608	6.49645	7.18419
calb2b	1.44023	0	4.80507	7.49229	9.2021	9.30145	17.5935	0	0	0	0	4.53042	0.0309938	1.79244	0.986204	0.990624	chr7	24699893	24700172	chr7:24699893-24700172	280	*	Promoter (<=1kb)	Promoter	7	24681278	24699946	18669	2	393684	NM_200711	0	ENSDARG00000036344	calbindin 2b	67.4442	36.8519	41.5128	16.2432	10.8311	13.1669	51.0823	18.7076	39.9614	18.2494	39.3665	38.607	calb2b_0	31.98	34.0461
calb2b	1.44023	0	4.80507	7.49229	9.2021	9.30145	17.5935	0	0	0	0	4.53042	0.0309938	1.79244	0.986204	0.990624	chr7	24700732	24700998	chr7:24700732-24700998	267	*	Promoter (<=1kb)	Promoter	7	24681278	24699946	18669	2	393684	NM_200711	-786	ENSDARG00000036344	calbindin 2b	4.12924	11.9227	1.18608	1.0152	7.49848	13.1669	1.54795	27.211	1.24879	9.87263	13.9423	19.3035	calb2b_-786	8.45968	11.0918
cax1	0	5.30674	5.49151	7.49229	71.6449	197.988	534.402	195.866	474.204	144.348	163.953	163.7	-3.98419	0.885009	6.73598e-06	3.51505e-05	chr4	14981807	14981937	chr4:14981807-14981937	131	*	Promoter (<=1kb)	Promoter	4	14981846	14990888	9043	1	560283	NM_001025507	0	ENSDARG00000045601	cation/H+ exchanger protein 1	45.4216	22.7614	3.55824	1.0152	4.16582	4.38895	1.54795	1.70069	33.7174	17.3519	27.8846	56.3019	cax1_0	10.57	33.8139
cax1	0	5.30674	5.49151	7.49229	71.6449	197.988	534.402	195.866	474.204	144.348	163.953	163.7	-3.98419	0.885009	6.73598e-06	3.51505e-05	chr4	14984603	14984758	chr4:14984603-14984758	156	*	Promoter (2-3kb)	Promoter	4	14981846	14990888	9043	1	560283	NM_001025507	2757	ENSDARG00000045601	cation/H+ exchanger protein 1	1.37641	15.1743	1.18608	1.0152	0.833164	1.46298	1.54795	1.70069	7.49276	7.77844	5.74095	4.82587	cax1_2757	3.0371	6.4595
ccnd1	4305.58	2388.03	3019.64	4323.73	1363.88	417.236	543.199	730.348	524.626	767.399	566.496	1722.74	2.38051	0.331778	7.23004e-13	9.72698e-12	chr7	54673145	54673386	chr7:54673145-54673386	242	*	Exon (NM_131025/30222, exon 5 of 5)	Exon	7	54670054	54677422	7369	2	30222	NM_131025	4036	ENSDARG00000101637	cyclin D1	38.5395	35.768	8.30256	4.0608	17.4964	19.0188	12.3836	5.10206	43.7078	15.5569	36.0859	65.9536	ccnd1_4036	17.584	40.326
ccnd1	4305.58	2388.03	3019.64	4323.73	1363.88	417.236	543.199	730.348	524.626	767.399	566.496	1722.74	2.38051	0.331778	7.23004e-13	9.72698e-12	chr7	54673483	54673881	chr7:54673483-54673881	399	*	Intron (NM_131025/30222, intron 3 of 4)	Intron	7	54670054	54677422	7369	2	30222	NM_131025	3541	ENSDARG00000101637	cyclin D1	35.7867	17.3421	103.189	108.626	100.813	20.4818	54.1782	20.4083	9.99034	7.77844	7.38122	11.2604	ccnd1_3541	57.6032	9.10259
ccnd1	4305.58	2388.03	3019.64	4323.73	1363.88	417.236	543.199	730.348	524.626	767.399	566.496	1722.74	2.38051	0.331778	7.23004e-13	9.72698e-12	chr7	54677130	54677662	chr7:54677130-54677662	533	*	Promoter (<=1kb)	Promoter	7	54670054	54677422	7369	2	30222	NM_131025	0	ENSDARG00000101637	cyclin D1	250.507	169.085	421.058	357.351	294.94	212.133	142.411	192.178	57.4445	33.2079	59.0497	35.3897	ccnd1_0	254.958	46.273
ccnd1	4305.58	2388.03	3019.64	4323.73	1363.88	417.236	543.199	730.348	524.626	767.399	566.496	1722.74	2.38051	0.331778	7.23004e-13	9.72698e-12	chr7	54678245	54678409	chr7:54678245-54678409	165	*	Promoter (<=1kb)	Promoter	7	54670054	54677422	7369	2	30222	NM_131025	-823	ENSDARG00000101637	cyclin D1	16.5169	14.0904	46.2571	31.4712	14.997	8.77791	23.2192	17.0069	3.74638	11.3685	4.92081	8.04312	ccnd1_-823	21.5421	7.0197
ccnd1	4305.58	2388.03	3019.64	4323.73	1363.88	417.236	543.199	730.348	524.626	767.399	566.496	1722.74	2.38051	0.331778	7.23004e-13	9.72698e-12	chr7	54679589	54679772	chr7:54679589-54679772	184	*	Promoter (2-3kb)	Promoter	7	54670054	54677422	7369	2	30222	NM_131025	-2167	ENSDARG00000101637	cyclin D1	28.9047	20.5937	47.4432	31.4712	38.3255	27.7967	47.9864	45.9186	21.2295	11.0693	11.4819	9.65175	ccnd1_-2167	36.055	13.3581
ccnd1	4305.58	2388.03	3019.64	4323.73	1363.88	417.236	543.199	730.348	524.626	767.399	566.496	1722.74	2.38051	0.331778	7.23004e-13	9.72698e-12	chr7	54688185	54688607	chr7:54688185-54688607	423	*	Distal Intergenic	Distal Intergenic	7	54670054	54677422	7369	2	30222	NM_131025	-10763	ENSDARG00000101637	cyclin D1	74.3263	67.2005	170.795	10.152	25.8281	4.38895	17.0274	27.211	11.2391	11.6677	7.38122	11.2604	ccnd1_-10763	49.6162	10.3871
ccnd1	4305.58	2388.03	3019.64	4323.73	1363.88	417.236	543.199	730.348	524.626	767.399	566.496	1722.74	2.38051	0.331778	7.23004e-13	9.72698e-12	chr7	54690902	54691267	chr7:54690902-54691267	366	*	Distal Intergenic	Distal Intergenic	7	54670054	54677422	7369	2	30222	NM_131025	-13480	ENSDARG00000101637	cyclin D1	2.75282	3.25164	22.5355	9.13681	11.6643	17.5558	17.0274	25.5103	16.2343	11.9668	0.820135	16.0862	ccnd1_-13480	13.6793	11.2769
ccnd1	4305.58	2388.03	3019.64	4323.73	1363.88	417.236	543.199	730.348	524.626	767.399	566.496	1722.74	2.38051	0.331778	7.23004e-13	9.72698e-12	chr7	54697878	54698033	chr7:54697878-54698033	156	*	Distal Intergenic	Distal Intergenic	7	54670054	54677422	7369	2	30222	NM_131025	-20456	ENSDARG00000101637	cyclin D1	1.37641	1.08388	5.9304	1.0152	7.49848	7.31492	9.28769	10.2041	13.7367	5.98341	12.302	8.04312	ccnd1_-20456	5.46389	10.0163
ccnd1	4305.58	2388.03	3019.64	4323.73	1363.88	417.236	543.199	730.348	524.626	767.399	566.496	1722.74	2.38051	0.331778	7.23004e-13	9.72698e-12	chr7	54702308	54702850	chr7:54702308-54702850	543	*	Distal Intergenic	Distal Intergenic	7	54670054	54677422	7369	2	30222	NM_131025	-24886	ENSDARG00000101637	cyclin D1	44.0452	31.4325	45.071	19.2888	45.824	19.0188	21.6713	34.0138	21.2295	18.8478	18.043	22.5207	ccnd1_-24886	32.5457	20.1602
ccnd1	4305.58	2388.03	3019.64	4323.73	1363.88	417.236	543.199	730.348	524.626	767.399	566.496	1722.74	2.38051	0.331778	7.23004e-13	9.72698e-12	chr7	54702897	54703120	chr7:54702897-54703120	224	*	Distal Intergenic	Distal Intergenic	7	54670054	54677422	7369	2	30222	NM_131025	-25475	ENSDARG00000101637	cyclin D1	1.37641	5.41939	4.74432	2.0304	1.66633	1.46298	7.73974	10.2041	17.4831	5.38507	6.56108	1.60862	ccnd1_-25475	4.33046	7.75947
ccnd1	4305.58	2388.03	3019.64	4323.73	1363.88	417.236	543.199	730.348	524.626	767.399	566.496	1722.74	2.38051	0.331778	7.23004e-13	9.72698e-12	chr7	54706496	54706719	chr7:54706496-54706719	224	*	Distal Intergenic	Distal Intergenic	7	54670054	54677422	7369	2	30222	NM_131025	-29074	ENSDARG00000101637	cyclin D1	13.7641	4.33551	2.37216	5.076	5.83215	7.31492	6.19179	15.3062	16.2343	6.28258	9.02149	1.60862	ccnd1_-29074	7.52411	8.28675
ccnd1	4305.58	2388.03	3019.64	4323.73	1363.88	417.236	543.199	730.348	524.626	767.399	566.496	1722.74	2.38051	0.331778	7.23004e-13	9.72698e-12	chr7	54713472	54713693	chr7:54713472-54713693	222	*	Distal Intergenic	Distal Intergenic	7	54670054	54677422	7369	2	30222	NM_131025	-36050	ENSDARG00000101637	cyclin D1	4.12924	4.33551	8.30256	1.0152	8.33164	7.31492	9.28769	17.0069	8.74155	7.47927	6.56108	4.82587	ccnd1_-36050	7.46545	6.90194
ccnd1	4305.58	2388.03	3019.64	4323.73	1363.88	417.236	543.199	730.348	524.626	767.399	566.496	1722.74	2.38051	0.331778	7.23004e-13	9.72698e-12	chr7	54718131	54718283	chr7:54718131-54718283	153	*	Distal Intergenic	Distal Intergenic	7	54670054	54677422	7369	2	30222	NM_131025	-40709	ENSDARG00000101637	cyclin D1	1.37641	1.08388	3.55824	4.0608	1.66633	1.46298	1.54795	1.70069	1.24879	6.28258	8.20135	9.65175	ccnd1_-40709	2.05716	6.34612
ccnd1	4305.58	2388.03	3019.64	4323.73	1363.88	417.236	543.199	730.348	524.626	767.399	566.496	1722.74	2.38051	0.331778	7.23004e-13	9.72698e-12	chr7	54718604	54718940	chr7:54718604-54718940	337	*	Distal Intergenic	Distal Intergenic	7	54670054	54677422	7369	2	30222	NM_131025	-41182	ENSDARG00000101637	cyclin D1	6.88206	14.0904	3.55824	11.1672	9.99797	16.0928	3.0959	20.4083	21.2295	20.3436	12.302	28.9552	ccnd1_-41182	10.6616	20.7076
ccnd1	4305.58	2388.03	3019.64	4323.73	1363.88	417.236	543.199	730.348	524.626	767.399	566.496	1722.74	2.38051	0.331778	7.23004e-13	9.72698e-12	chr7	54728963	54729277	chr7:54728963-54729277	315	*	Distal Intergenic	Distal Intergenic	7	54670054	54677422	7369	2	30222	NM_131025	-51541	ENSDARG00000101637	cyclin D1	6.88206	7.58715	3.55824	8.12161	8.33164	1.46298	4.64384	8.50344	21.2295	8.37678	5.74095	11.2604	ccnd1_-51541	6.13637	11.6519
ccnd1	4305.58	2388.03	3019.64	4323.73	1363.88	417.236	543.199	730.348	524.626	767.399	566.496	1722.74	2.38051	0.331778	7.23004e-13	9.72698e-12	chr7	54732949	54733694	chr7:54732949-54733694	746	*	Distal Intergenic	Distal Intergenic	7	54670054	54677422	7369	2	30222	NM_131025	-55527	ENSDARG00000101637	cyclin D1	28.9047	22.7614	46.2571	65.9881	35.8261	45.3525	40.2466	18.7076	21.2295	24.532	10.6618	32.1725	ccnd1_-55527	38.0055	22.1489
ccnd1	4305.58	2388.03	3019.64	4323.73	1363.88	417.236	543.199	730.348	524.626	767.399	566.496	1722.74	2.38051	0.331778	7.23004e-13	9.72698e-12	chr7	54736214	54736528	chr7:54736214-54736528	315	*	Distal Intergenic	Distal Intergenic	7	54670054	54677422	7369	2	30222	NM_131025	-58792	ENSDARG00000101637	cyclin D1	17.8934	9.75491	8.30256	1.0152	4.16582	10.2409	1.54795	1.70069	36.215	14.3602	18.8631	9.65175	ccnd1_-58792	6.82767	19.7725
ccnd1	4305.58	2388.03	3019.64	4323.73	1363.88	417.236	543.199	730.348	524.626	767.399	566.496	1722.74	2.38051	0.331778	7.23004e-13	9.72698e-12	chr7	54739631	54740134	chr7:54739631-54740134	504	*	Distal Intergenic	Distal Intergenic	7	54670054	54677422	7369	2	30222	NM_131025	-62209	ENSDARG00000101637	cyclin D1	9.63489	4.33551	72.3509	58.8816	23.3286	42.4266	41.7946	28.9117	12.4879	14.6594	9.02149	19.3035	ccnd1_-62209	35.208	13.8681
ccnd1	4305.58	2388.03	3019.64	4323.73	1363.88	417.236	543.199	730.348	524.626	767.399	566.496	1722.74	2.38051	0.331778	7.23004e-13	9.72698e-12	chr7	54743405	54743711	chr7:54743405-54743711	307	*	Distal Intergenic	Distal Intergenic	7	54670054	54677422	7369	2	30222	NM_131025	-65983	ENSDARG00000101637	cyclin D1	1.37641	7.58715	3.55824	5.076	5.83215	16.0928	23.2192	22.1089	6.24397	20.0444	22.1436	12.869	ccnd1_-65983	10.6064	15.3253
ccnd1	4305.58	2388.03	3019.64	4323.73	1363.88	417.236	543.199	730.348	524.626	767.399	566.496	1722.74	2.38051	0.331778	7.23004e-13	9.72698e-12	chr7	54749395	54749522	chr7:54749395-54749522	128	*	Distal Intergenic	Distal Intergenic	7	54670054	54677422	7369	2	30222	NM_131025	-71973	ENSDARG00000101637	cyclin D1	28.9047	14.0904	36.7685	34.5168	22.4954	39.5006	51.0823	39.1158	49.9517	37.3963	36.9061	69.1709	ccnd1_-71973	33.3093	48.3562
ccnd1	4305.58	2388.03	3019.64	4323.73	1363.88	417.236	543.199	730.348	524.626	767.399	566.496	1722.74	2.38051	0.331778	7.23004e-13	9.72698e-12	chr7	54761891	54762284	chr7:54761891-54762284	394	*	Distal Intergenic	Distal Intergenic	7	54670054	54677422	7369	2	30222	NM_131025	-84469	ENSDARG00000101637	cyclin D1	59.1857	59.6133	143.516	43.6536	49.1567	16.0928	26.3151	42.5172	69.9324	28.122	14.7624	40.2156	ccnd1_-84469	55.0063	38.2581
ccnd1	4305.58	2388.03	3019.64	4323.73	1363.88	417.236	543.199	730.348	524.626	767.399	566.496	1722.74	2.38051	0.331778	7.23004e-13	9.72698e-12	chr7	54767040	54767160	chr7:54767040-54767160	121	*	Distal Intergenic	Distal Intergenic	7	54670054	54677422	7369	2	30222	NM_131025	-89618	ENSDARG00000101637	cyclin D1	15.1405	8.67103	1.18608	2.0304	2.49949	5.85194	1.54795	3.40138	26.2247	6.88093	9.02149	36.9984	ccnd1_-89618	5.0411	19.7814
ccnd1	4305.58	2388.03	3019.64	4323.73	1363.88	417.236	543.199	730.348	524.626	767.399	566.496	1722.74	2.38051	0.331778	7.23004e-13	9.72698e-12	chr7	54769444	54769737	chr7:54769444-54769737	294	*	Distal Intergenic	Distal Intergenic	7	54670054	54677422	7369	2	30222	NM_131025	-92022	ENSDARG00000101637	cyclin D1	44.0452	16.2582	69.9787	11.1672	31.6602	1.46298	6.19179	8.50344	6.24397	5.68424	4.10068	11.2604	ccnd1_-92022	23.6585	6.82231
ccnd1	4305.58	2388.03	3019.64	4323.73	1363.88	417.236	543.199	730.348	524.626	767.399	566.496	1722.74	2.38051	0.331778	7.23004e-13	9.72698e-12	chr7	54771899	54772020	chr7:54771899-54772020	122	*	Distal Intergenic	Distal Intergenic	7	54670054	54677422	7369	2	30222	NM_131025	-94477	ENSDARG00000101637	cyclin D1	1.37641	1.08388	10.6747	5.076	4.16582	7.31492	1.54795	5.10206	9.99034	7.47927	15.5826	8.04312	ccnd1_-94477	4.54272	10.2738
ccnd1	4305.58	2388.03	3019.64	4323.73	1363.88	417.236	543.199	730.348	524.626	767.399	566.496	1722.74	2.38051	0.331778	7.23004e-13	9.72698e-12	chr7	54779330	54779709	chr7:54779330-54779709	380	*	Distal Intergenic	Distal Intergenic	7	54670054	54677422	7369	2	30222	NM_131025	-101908	ENSDARG00000101637	cyclin D1	23.399	7.58715	10.6747	3.0456	9.1648	1.46298	4.64384	11.9048	6.24397	11.3685	9.02149	19.3035	ccnd1_-101908	8.98537	11.4844
ccnd1	4305.58	2388.03	3019.64	4323.73	1363.88	417.236	543.199	730.348	524.626	767.399	566.496	1722.74	2.38051	0.331778	7.23004e-13	9.72698e-12	chr7	54784203	54784323	chr7:54784203-54784323	121	*	Distal Intergenic	Distal Intergenic	7	54670054	54677422	7369	2	30222	NM_131025	-106781	ENSDARG00000101637	cyclin D1	4.12924	1.08388	2.37216	1.0152	0.833164	7.31492	1.54795	6.80275	1.24879	4.18839	9.02149	1.60862	ccnd1_-106781	3.13741	4.01682
ccnd1	4305.58	2388.03	3019.64	4323.73	1363.88	417.236	543.199	730.348	524.626	767.399	566.496	1722.74	2.38051	0.331778	7.23004e-13	9.72698e-12	chr7	54789639	54790079	chr7:54789639-54790079	441	*	Distal Intergenic	Distal Intergenic	7	54670054	54677422	7369	2	30222	NM_131025	-112217	ENSDARG00000101637	cyclin D1	59.1857	50.9423	257.379	143.143	128.307	80.4642	126.932	32.3131	8.74155	10.1718	13.1222	24.1294	ccnd1_-112217	109.833	14.0412
ccnd1	4305.58	2388.03	3019.64	4323.73	1363.88	417.236	543.199	730.348	524.626	767.399	566.496	1722.74	2.38051	0.331778	7.23004e-13	9.72698e-12	chr7	54792549	54792852	chr7:54792549-54792852	304	*	Distal Intergenic	Distal Intergenic	7	54670054	54677422	7369	2	30222	NM_131025	-115127	ENSDARG00000101637	cyclin D1	6.88206	17.3421	4.74432	2.0304	4.16582	1.46298	13.9315	6.80275	11.2391	12.8643	4.10068	17.6949	ccnd1_-115127	7.17024	11.4748
ccnd1	4305.58	2388.03	3019.64	4323.73	1363.88	417.236	543.199	730.348	524.626	767.399	566.496	1722.74	2.38051	0.331778	7.23004e-13	9.72698e-12	chr7	54795563	54795800	chr7:54795563-54795800	238	*	Distal Intergenic	Distal Intergenic	7	54670054	54677422	7369	2	30222	NM_131025	-118141	ENSDARG00000101637	cyclin D1	4.12924	5.41939	5.9304	3.0456	5.83215	1.46298	1.54795	3.40138	1.24879	7.77844	14.7624	16.0862	ccnd1_-118141	3.84614	9.96898
ccnd1	4305.58	2388.03	3019.64	4323.73	1363.88	417.236	543.199	730.348	524.626	767.399	566.496	1722.74	2.38051	0.331778	7.23004e-13	9.72698e-12	chr7	54796273	54796562	chr7:54796273-54796562	290	*	Distal Intergenic	Distal Intergenic	7	54670054	54677422	7369	2	30222	NM_131025	-118851	ENSDARG00000101637	cyclin D1	9.63489	3.25164	16.6051	5.076	14.997	4.38895	3.0959	1.70069	3.74638	6.28258	8.20135	1.60862	ccnd1_-118851	7.34377	4.95973
ccnd1	4305.58	2388.03	3019.64	4323.73	1363.88	417.236	543.199	730.348	524.626	767.399	566.496	1722.74	2.38051	0.331778	7.23004e-13	9.72698e-12	chr7	54812842	54813075	chr7:54812842-54813075	234	*	Distal Intergenic	Distal Intergenic	7	54670054	54677422	7369	2	30222	NM_131025	-135420	ENSDARG00000101637	cyclin D1	1.37641	3.25164	1.18608	3.0456	0.833164	10.2409	1.54795	11.9048	12.4879	7.47927	7.38122	16.0862	ccnd1_-135420	4.17332	10.8587
ccnd1	4305.58	2388.03	3019.64	4323.73	1363.88	417.236	543.199	730.348	524.626	767.399	566.496	1722.74	2.38051	0.331778	7.23004e-13	9.72698e-12	chr7	54813122	54813541	chr7:54813122-54813541	420	*	Distal Intergenic	Distal Intergenic	7	54670054	54677422	7369	2	30222	NM_131025	-135700	ENSDARG00000101637	cyclin D1	9.63489	7.58715	5.9304	7.10641	9.1648	8.77791	9.28769	28.9117	11.2391	16.4544	16.4027	9.65175	ccnd1_-135700	10.8001	13.437
ccnd1	4305.58	2388.03	3019.64	4323.73	1363.88	417.236	543.199	730.348	524.626	767.399	566.496	1722.74	2.38051	0.331778	7.23004e-13	9.72698e-12	chr7	54816633	54816812	chr7:54816633-54816812	180	*	Distal Intergenic	Distal Intergenic	7	54670054	54677422	7369	2	30222	NM_131025	-139211	ENSDARG00000101637	cyclin D1	1.37641	3.25164	3.55824	3.0456	10.8311	13.1669	4.64384	8.50344	7.49276	8.97512	4.10068	8.04312	ccnd1_-139211	6.04715	7.15292
ccnd1	4305.58	2388.03	3019.64	4323.73	1363.88	417.236	543.199	730.348	524.626	767.399	566.496	1722.74	2.38051	0.331778	7.23004e-13	9.72698e-12	chr7	54817278	54817620	chr7:54817278-54817620	343	*	Distal Intergenic	Distal Intergenic	7	54670054	54677422	7369	2	30222	NM_131025	-139856	ENSDARG00000101637	cyclin D1	12.3877	5.41939	36.7685	4.0608	5.83215	19.0188	4.64384	8.50344	12.4879	12.266	9.02149	12.869	ccnd1_-139856	12.0793	11.6611
ccnd1	4305.58	2388.03	3019.64	4323.73	1363.88	417.236	543.199	730.348	524.626	767.399	566.496	1722.74	2.38051	0.331778	7.23004e-13	9.72698e-12	chr7	54824774	54824901	chr7:54824774-54824901	128	*	Distal Intergenic	Distal Intergenic	7	54670054	54677422	7369	2	30222	NM_131025	-147352	ENSDARG00000101637	cyclin D1	28.9047	18.4259	17.7912	11.1672	17.4964	24.8707	32.5069	32.3131	53.6981	30.2162	30.345	49.8674	ccnd1_-147352	22.9345	41.0317
ccnd1	4305.58	2388.03	3019.64	4323.73	1363.88	417.236	543.199	730.348	524.626	767.399	566.496	1722.74	2.38051	0.331778	7.23004e-13	9.72698e-12	chr7	54826542	54827058	chr7:54826542-54827058	517	*	Distal Intergenic	Distal Intergenic	7	54670054	54677422	7369	2	30222	NM_131025	-149120	ENSDARG00000101637	cyclin D1	15.1405	16.2582	5.9304	1.0152	10.8311	7.31492	10.8356	35.7144	6.24397	13.4627	8.20135	17.6949	ccnd1_-149120	12.8801	11.4007
ccnd1	4305.58	2388.03	3019.64	4323.73	1363.88	417.236	543.199	730.348	524.626	767.399	566.496	1722.74	2.38051	0.331778	7.23004e-13	9.72698e-12	chr7	54832030	54832287	chr7:54832030-54832287	258	*	Distal Intergenic	Distal Intergenic	7	54670054	54677422	7369	2	30222	NM_131025	-154608	ENSDARG00000101637	cyclin D1	16.5169	1.08388	1.18608	7.10641	3.33266	1.46298	7.73974	8.50344	8.74155	7.77844	9.84162	11.2604	ccnd1_-154608	5.86652	9.4055
ccnd1	4305.58	2388.03	3019.64	4323.73	1363.88	417.236	543.199	730.348	524.626	767.399	566.496	1722.74	2.38051	0.331778	7.23004e-13	9.72698e-12	chr7	54834429	54834968	chr7:54834429-54834968	540	*	Distal Intergenic	Distal Intergenic	7	54670054	54677422	7369	2	30222	NM_131025	-157007	ENSDARG00000101637	cyclin D1	11.0113	27.097	33.2102	48.7296	92.4812	51.2045	46.4384	40.8165	11.2391	20.3436	22.1436	11.2604	ccnd1_-157007	43.8736	16.2467
ccnd1	4305.58	2388.03	3019.64	4323.73	1363.88	417.236	543.199	730.348	524.626	767.399	566.496	1722.74	2.38051	0.331778	7.23004e-13	9.72698e-12	chr7	54839075	54839338	chr7:54839075-54839338	264	*	Distal Intergenic	Distal Intergenic	7	54670054	54677422	7369	2	30222	NM_131025	-161653	ENSDARG00000101637	cyclin D1	27.5282	11.9227	17.7912	7.10641	7.49848	11.7039	3.0959	8.50344	4.99517	6.88093	7.38122	9.65175	ccnd1_-161653	11.8938	7.22727
ccnd1	4305.58	2388.03	3019.64	4323.73	1363.88	417.236	543.199	730.348	524.626	767.399	566.496	1722.74	2.38051	0.331778	7.23004e-13	9.72698e-12	chr7	54843161	54843335	chr7:54843161-54843335	175	*	Distal Intergenic	Distal Intergenic	7	54670054	54677422	7369	2	30222	NM_131025	-165739	ENSDARG00000101637	cyclin D1	1.37641	6.50327	1.18608	3.0456	5.83215	7.31492	4.64384	15.3062	2.49759	6.28258	6.56108	6.4345	ccnd1_-165739	5.65106	5.44394
ccnd1	4305.58	2388.03	3019.64	4323.73	1363.88	417.236	543.199	730.348	524.626	767.399	566.496	1722.74	2.38051	0.331778	7.23004e-13	9.72698e-12	chr7	54852086	54852224	chr7:54852086-54852224	139	*	Distal Intergenic	Distal Intergenic	7	54670054	54677422	7369	2	30222	NM_131025	-174664	ENSDARG00000101637	cyclin D1	2.75282	5.41939	10.6747	3.0456	8.33164	1.46298	3.0959	10.2041	16.2343	6.28258	9.02149	17.6949	ccnd1_-174664	5.6234	12.3083
ccnd1	4305.58	2388.03	3019.64	4323.73	1363.88	417.236	543.199	730.348	524.626	767.399	566.496	1722.74	2.38051	0.331778	7.23004e-13	9.72698e-12	chr7	54853722	54853840	chr7:54853722-54853840	119	*	Distal Intergenic	Distal Intergenic	7	54670054	54677422	7369	2	30222	NM_131025	-176300	ENSDARG00000101637	cyclin D1	6.88206	3.25164	3.55824	3.0456	4.16582	4.38895	1.54795	1.70069	3.74638	3.88922	9.02149	1.60862	ccnd1_-176300	3.56762	4.56643
ccnd1	4305.58	2388.03	3019.64	4323.73	1363.88	417.236	543.199	730.348	524.626	767.399	566.496	1722.74	2.38051	0.331778	7.23004e-13	9.72698e-12	chr7	54856028	54856293	chr7:54856028-54856293	266	*	Distal Intergenic	Distal Intergenic	7	54670054	54677422	7369	2	30222	NM_131025	-178606	ENSDARG00000101637	cyclin D1	5.50565	9.75491	10.6747	3.0456	4.16582	2.92597	20.1233	3.40138	4.99517	9.57346	8.20135	12.869	ccnd1_-178606	7.44967	8.90975
ccnd1	4305.58	2388.03	3019.64	4323.73	1363.88	417.236	543.199	730.348	524.626	767.399	566.496	1722.74	2.38051	0.331778	7.23004e-13	9.72698e-12	chr7	54860406	54860535	chr7:54860406-54860535	130	*	Distal Intergenic	Distal Intergenic	7	54670054	54677422	7369	2	30222	NM_131025	-182984	ENSDARG00000101637	cyclin D1	9.63489	5.41939	1.18608	7.10641	4.16582	7.31492	9.28769	1.70069	4.99517	6.88093	5.74095	12.869	ccnd1_-182984	5.72699	7.62151
cdh6	25.9242	31.8405	10.2966	10.2168	20.3761	399.962	708.137	590.918	2151.33	206.211	188.424	394.876	-5.16592	0.626864	1.70935e-16	3.18279e-15	chr2	28050869	28051221	chr2:28050869-28051221	353	*	Exon (NM_001013520/541393, exon 12 of 14)	Exon	2	28049054	28102264	53211	2	541393	NM_001013520	51043	ENSDARG00000014522	cadherin 6	11.0113	14.0904	7.11648	11.1672	4.99898	8.77791	26.3151	30.6124	17.4831	14.061	18.043	20.9121	cdh6_51043	14.2612	17.6248
cdh6	25.9242	31.8405	10.2966	10.2168	20.3761	399.962	708.137	590.918	2151.33	206.211	188.424	394.876	-5.16592	0.626864	1.70935e-16	3.18279e-15	chr2	28053707	28053825	chr2:28053707-28053825	119	*	Intron (NM_001013520/541393, intron 11 of 13)	Intron	2	28049054	28102264	53211	2	541393	NM_001013520	48439	ENSDARG00000014522	cadherin 6	37.1631	29.2647	1.18608	1.0152	3.33266	2.92597	4.64384	5.10206	53.6981	9.27429	35.2658	90.083	cdh6_48439	10.5792	47.0803
cdh6	25.9242	31.8405	10.2966	10.2168	20.3761	399.962	708.137	590.918	2151.33	206.211	188.424	394.876	-5.16592	0.626864	1.70935e-16	3.18279e-15	chr2	28057374	28057946	chr2:28057374-28057946	573	*	Exon (NM_001013520/541393, exon 11 of 14)	Exon	2	28049054	28102264	53211	2	541393	NM_001013520	44318	ENSDARG00000014522	cadherin 6	20.6462	16.2582	17.7912	21.3192	15.8301	10.2409	26.3151	39.1158	18.7319	21.2411	15.5826	14.4776	cdh6_44318	20.9396	17.5083
cdh6	25.9242	31.8405	10.2966	10.2168	20.3761	399.962	708.137	590.918	2151.33	206.211	188.424	394.876	-5.16592	0.626864	1.70935e-16	3.18279e-15	chr2	28067844	28068276	chr2:28067844-28068276	433	*	Intron (NM_001013520/541393, intron 7 of 13)	Intron	2	28049054	28102264	53211	2	541393	NM_001013520	33988	ENSDARG00000014522	cadherin 6	59.1857	31.4325	10.6747	27.4104	13.3306	16.0928	26.3151	10.2041	41.2102	16.1552	46.7477	94.9089	cdh6_33988	24.3308	49.7555
cdh6	25.9242	31.8405	10.2966	10.2168	20.3761	399.962	708.137	590.918	2151.33	206.211	188.424	394.876	-5.16592	0.626864	1.70935e-16	3.18279e-15	chr2	28075190	28075385	chr2:28075190-28075385	196	*	Exon (NM_001013520/541393, exon 6 of 14)	Exon	2	28049054	28102264	53211	2	541393	NM_001013520	26879	ENSDARG00000014522	cadherin 6	37.1631	46.6068	3.55824	13.1976	2.49949	1.46298	15.4795	15.3062	48.7029	15.5569	33.6255	96.5175	cdh6_26879	16.9092	48.6007
cdh6	25.9242	31.8405	10.2966	10.2168	20.3761	399.962	708.137	590.918	2151.33	206.211	188.424	394.876	-5.16592	0.626864	1.70935e-16	3.18279e-15	chr2	28079291	28079439	chr2:28079291-28079439	149	*	Exon (NM_001013520/541393, exon 4 of 14)	Exon	2	28049054	28102264	53211	2	541393	NM_001013520	22825	ENSDARG00000014522	cadherin 6	5.50565	5.41939	13.0469	8.12161	12.4975	4.38895	7.73974	11.9048	11.2391	7.1801	4.10068	4.82587	cdh6_22825	8.57806	6.83645
cdh6	25.9242	31.8405	10.2966	10.2168	20.3761	399.962	708.137	590.918	2151.33	206.211	188.424	394.876	-5.16592	0.626864	1.70935e-16	3.18279e-15	chr2	28082054	28082373	chr2:28082054-28082373	320	*	Exon (NM_001013520/541393, exon 3 of 14)	Exon	2	28049054	28102264	53211	2	541393	NM_001013520	19891	ENSDARG00000014522	cadherin 6	9.63489	2.16776	5.9304	13.1976	1.66633	1.46298	10.8356	34.0138	12.4879	13.7619	7.38122	8.04312	cdh6_19891	9.86367	10.4185
cdh6	25.9242	31.8405	10.2966	10.2168	20.3761	399.962	708.137	590.918	2151.33	206.211	188.424	394.876	-5.16592	0.626864	1.70935e-16	3.18279e-15	chr2	28082591	28082710	chr2:28082591-28082710	120	*	Intron (NM_001013520/541393, intron 2 of 13)	Intron	2	28049054	28102264	53211	2	541393	NM_001013520	19554	ENSDARG00000014522	cadherin 6	31.6575	16.2582	1.18608	3.0456	1.66633	7.31492	1.54795	13.6055	21.2295	12.266	33.6255	77.214	cdh6_19554	9.53526	36.0838
cdh6	25.9242	31.8405	10.2966	10.2168	20.3761	399.962	708.137	590.918	2151.33	206.211	188.424	394.876	-5.16592	0.626864	1.70935e-16	3.18279e-15	chr2	28082881	28083141	chr2:28082881-28083141	261	*	Intron (NM_001013520/541393, intron 2 of 13)	Intron	2	28049054	28102264	53211	2	541393	NM_001013520	19123	ENSDARG00000014522	cadherin 6	46.798	27.097	21.3494	6.0912	6.66531	14.6298	7.73974	8.50344	8.74155	9.27429	3.28054	22.5207	cdh6_19123	17.3592	10.9543
cdh6	25.9242	31.8405	10.2966	10.2168	20.3761	399.962	708.137	590.918	2151.33	206.211	188.424	394.876	-5.16592	0.626864	1.70935e-16	3.18279e-15	chr2	28087099	28087305	chr2:28087099-28087305	207	*	Intron (NM_001013520/541393, intron 1 of 13)	Intron	2	28049054	28102264	53211	2	541393	NM_001013520	14959	ENSDARG00000014522	cadherin 6	11.0113	2.16776	7.11648	11.1672	12.4975	4.38895	10.8356	1.70069	13.7367	8.97512	5.74095	1.60862	cdh6_14959	7.61069	7.51535
cdh6	25.9242	31.8405	10.2966	10.2168	20.3761	399.962	708.137	590.918	2151.33	206.211	188.424	394.876	-5.16592	0.626864	1.70935e-16	3.18279e-15	chr2	28093023	28093570	chr2:28093023-28093570	548	*	Intron (NM_001013520/541393, intron 1 of 13)	Intron	2	28049054	28102264	53211	2	541393	NM_001013520	8694	ENSDARG00000014522	cadherin 6	5.50565	10.8388	22.5355	40.608	46.6572	35.1116	20.1233	25.5103	12.4879	13.1635	9.84162	12.869	cdh6_8694	25.8613	12.0905
cdh6	25.9242	31.8405	10.2966	10.2168	20.3761	399.962	708.137	590.918	2151.33	206.211	188.424	394.876	-5.16592	0.626864	1.70935e-16	3.18279e-15	chr2	28093828	28093970	chr2:28093828-28093970	143	*	Intron (NM_001013520/541393, intron 1 of 13)	Intron	2	28049054	28102264	53211	2	541393	NM_001013520	8294	ENSDARG00000014522	cadherin 6	1.37641	7.58715	3.55824	11.1672	2.49949	1.46298	9.28769	11.9048	2.49759	8.37678	4.92081	4.82587	cdh6_8294	6.1055	5.15526
cdh6	25.9242	31.8405	10.2966	10.2168	20.3761	399.962	708.137	590.918	2151.33	206.211	188.424	394.876	-5.16592	0.626864	1.70935e-16	3.18279e-15	chr2	28099265	28099445	chr2:28099265-28099445	181	*	Promoter (2-3kb)	Promoter	2	28049054	28102264	53211	2	541393	NM_001013520	2819	ENSDARG00000014522	cadherin 6	12.3877	7.58715	2.37216	4.0608	4.16582	13.1669	9.28769	8.50344	34.9662	6.88093	9.02149	14.4776	cdh6_2819	7.69145	16.3366
cdh6	25.9242	31.8405	10.2966	10.2168	20.3761	399.962	708.137	590.918	2151.33	206.211	188.424	394.876	-5.16592	0.626864	1.70935e-16	3.18279e-15	chr2	28102171	28102351	chr2:28102171-28102351	181	*	Promoter (<=1kb)	Promoter	2	28049054	28102264	53211	2	541393	NM_001013520	0	ENSDARG00000014522	cadherin 6	2.75282	5.41939	10.6747	15.228	10.8311	16.0928	6.19179	11.9048	11.2391	6.58176	8.20135	6.4345	cdh6_0	9.88694	8.11419
cdh6	25.9242	31.8405	10.2966	10.2168	20.3761	399.962	708.137	590.918	2151.33	206.211	188.424	394.876	-5.16592	0.626864	1.70935e-16	3.18279e-15	chr2	28105609	28105878	chr2:28105609-28105878	270	*	Distal Intergenic	Distal Intergenic	2	28049054	28102264	53211	2	541393	NM_001013520	-3345	ENSDARG00000014522	cadherin 6	4.12924	5.41939	9.48864	28.4256	10.8311	11.7039	7.73974	8.50344	4.99517	8.67595	4.10068	1.60862	cdh6_-3345	10.7801	4.84511
cdh6	25.9242	31.8405	10.2966	10.2168	20.3761	399.962	708.137	590.918	2151.33	206.211	188.424	394.876	-5.16592	0.626864	1.70935e-16	3.18279e-15	chr2	28108679	28109037	chr2:28108679-28109037	359	*	Distal Intergenic	Distal Intergenic	2	28049054	28102264	53211	2	541393	NM_001013520	-6415	ENSDARG00000014522	cadherin 6	12.3877	2.16776	11.8608	33.5016	6.66531	11.7039	17.0274	3.40138	8.74155	5.38507	10.6618	6.4345	cdh6_-6415	12.3395	7.80572
cdh6	25.9242	31.8405	10.2966	10.2168	20.3761	399.962	708.137	590.918	2151.33	206.211	188.424	394.876	-5.16592	0.626864	1.70935e-16	3.18279e-15	chr2	28119212	28119507	chr2:28119212-28119507	296	*	Distal Intergenic	Distal Intergenic	2	28049054	28102264	53211	2	541393	NM_001013520	-16948	ENSDARG00000014522	cadherin 6	1.37641	5.41939	3.55824	1.0152	4.99898	10.2409	7.73974	11.9048	1.24879	11.3685	5.74095	8.04312	cdh6_-16948	5.78171	6.60034
cdh6	25.9242	31.8405	10.2966	10.2168	20.3761	399.962	708.137	590.918	2151.33	206.211	188.424	394.876	-5.16592	0.626864	1.70935e-16	3.18279e-15	chr2	28123647	28123862	chr2:28123647-28123862	216	*	Distal Intergenic	Distal Intergenic	2	28049054	28102264	53211	2	541393	NM_001013520	-21383	ENSDARG00000014522	cadherin 6	6.88206	3.25164	17.7912	11.1672	14.1638	13.1669	9.28769	13.6055	7.49276	8.37678	8.20135	6.4345	cdh6_-21383	11.1645	7.62635
cdh6	25.9242	31.8405	10.2966	10.2168	20.3761	399.962	708.137	590.918	2151.33	206.211	188.424	394.876	-5.16592	0.626864	1.70935e-16	3.18279e-15	chr2	28132061	28132301	chr2:28132061-28132301	241	*	Distal Intergenic	Distal Intergenic	2	28049054	28102264	53211	2	541393	NM_001013520	-29797	ENSDARG00000014522	cadherin 6	49.5508	18.4259	80.6534	15.228	4.16582	4.38895	1.54795	17.0069	1.24879	2.09419	3.28054	1.60862	cdh6_-29797	23.871	2.05804
cdh6	25.9242	31.8405	10.2966	10.2168	20.3761	399.962	708.137	590.918	2151.33	206.211	188.424	394.876	-5.16592	0.626864	1.70935e-16	3.18279e-15	chr2	28132891	28133068	chr2:28132891-28133068	178	*	Distal Intergenic	Distal Intergenic	2	28049054	28102264	53211	2	541393	NM_001013520	-30627	ENSDARG00000014522	cadherin 6	1.37641	1.08388	1.18608	3.0456	1.66633	1.46298	7.73974	1.70069	13.7367	6.58176	8.20135	9.65175	cdh6_-30627	2.40771	9.54289
cdh6	25.9242	31.8405	10.2966	10.2168	20.3761	399.962	708.137	590.918	2151.33	206.211	188.424	394.876	-5.16592	0.626864	1.70935e-16	3.18279e-15	chr2	28133540	28133887	chr2:28133540-28133887	348	*	Distal Intergenic	Distal Intergenic	2	28049054	28102264	53211	2	541393	NM_001013520	-31276	ENSDARG00000014522	cadherin 6	92.2196	7.58715	163.679	23.3496	45.824	21.9448	7.73974	1.70069	6.24397	8.07761	4.10068	6.4345	cdh6_-31276	45.5056	6.21419
cdh6	25.9242	31.8405	10.2966	10.2168	20.3761	399.962	708.137	590.918	2151.33	206.211	188.424	394.876	-5.16592	0.626864	1.70935e-16	3.18279e-15	chr2	28134798	28135245	chr2:28134798-28135245	448	*	Distal Intergenic	Distal Intergenic	2	28049054	28102264	53211	2	541393	NM_001013520	-32534	ENSDARG00000014522	cadherin 6	42.6688	5.41939	27.2798	70.0489	46.6572	17.5558	7.73974	11.9048	17.4831	11.0693	16.4027	1.60862	cdh6_-32534	28.6593	11.6409
cdh6	25.9242	31.8405	10.2966	10.2168	20.3761	399.962	708.137	590.918	2151.33	206.211	188.424	394.876	-5.16592	0.626864	1.70935e-16	3.18279e-15	chr2	28146500	28146618	chr2:28146500-28146618	119	*	Distal Intergenic	Distal Intergenic	2	28049054	28102264	53211	2	541393	NM_001013520	-44236	ENSDARG00000014522	cadherin 6	15.1405	9.75491	5.9304	7.10641	6.66531	10.2409	7.73974	18.7076	6.24397	8.67595	4.10068	11.2604	cdh6_-44236	10.1607	7.57024
cdh6	25.9242	31.8405	10.2966	10.2168	20.3761	399.962	708.137	590.918	2151.33	206.211	188.424	394.876	-5.16592	0.626864	1.70935e-16	3.18279e-15	chr2	28154821	28155058	chr2:28154821-28155058	238	*	Distal Intergenic	Distal Intergenic	2	28049054	28102264	53211	2	541393	NM_001013520	-52557	ENSDARG00000014522	cadherin 6	4.12924	1.08388	5.9304	5.076	2.49949	5.85194	6.19179	5.10206	11.2391	8.37678	10.6618	4.82587	cdh6_-52557	4.4831	8.77589
cdh6	25.9242	31.8405	10.2966	10.2168	20.3761	399.962	708.137	590.918	2151.33	206.211	188.424	394.876	-5.16592	0.626864	1.70935e-16	3.18279e-15	chr2	28180902	28181536	chr2:28180902-28181536	635	*	Distal Intergenic	Distal Intergenic	2	28049054	28102264	53211	2	541393	NM_001013520	-78638	ENSDARG00000014522	cadherin 6	20.6462	20.5937	27.2798	21.3192	2.49949	7.31492	13.9315	32.3131	53.6981	21.5403	23.7839	20.9121	cdh6_-78638	18.2372	29.9836
cdh6	25.9242	31.8405	10.2966	10.2168	20.3761	399.962	708.137	590.918	2151.33	206.211	188.424	394.876	-5.16592	0.626864	1.70935e-16	3.18279e-15	chr2	28184515	28184768	chr2:28184515-28184768	254	*	Distal Intergenic	Distal Intergenic	2	28049054	28102264	53211	2	541393	NM_001013520	-82251	ENSDARG00000014522	cadherin 6	1.37641	2.16776	15.419	16.2432	9.99797	7.31492	6.19179	15.3062	12.4879	7.1801	13.1222	4.82587	cdh6_-82251	9.25216	9.40402
cdh6	25.9242	31.8405	10.2966	10.2168	20.3761	399.962	708.137	590.918	2151.33	206.211	188.424	394.876	-5.16592	0.626864	1.70935e-16	3.18279e-15	chr2	28189946	28190293	chr2:28189946-28190293	348	*	Distal Intergenic	Distal Intergenic	2	28049054	28102264	53211	2	541393	NM_001013520	-87682	ENSDARG00000014522	cadherin 6	12.3877	10.8388	71.1648	80.2009	41.6582	23.4078	17.0274	23.8096	8.74155	8.07761	9.02149	22.5207	cdh6_-87682	35.0619	12.0903
cdh6	25.9242	31.8405	10.2966	10.2168	20.3761	399.962	708.137	590.918	2151.33	206.211	188.424	394.876	-5.16592	0.626864	1.70935e-16	3.18279e-15	chr2	28193191	28193320	chr2:28193191-28193320	130	*	Distal Intergenic	Distal Intergenic	2	28049054	28102264	53211	2	541393	NM_001013520	-90927	ENSDARG00000014522	cadherin 6	180.31	217.86	183.842	191.873	166.633	234.078	273.987	258.505	273.486	185.187	237.019	342.637	cdh6_-90927	213.386	259.582
cdh6	25.9242	31.8405	10.2966	10.2168	20.3761	399.962	708.137	590.918	2151.33	206.211	188.424	394.876	-5.16592	0.626864	1.70935e-16	3.18279e-15	chr2	28201133	28201336	chr2:28201133-28201336	204	*	Distal Intergenic	Distal Intergenic	2	28049054	28102264	53211	2	541393	NM_001013520	-98869	ENSDARG00000014522	cadherin 6	9.63489	6.50327	4.74432	16.2432	0.833164	1.46298	10.8356	5.10206	13.7367	4.78673	9.02149	11.2604	cdh6_-98869	6.91994	9.70133
cdh6	25.9242	31.8405	10.2966	10.2168	20.3761	399.962	708.137	590.918	2151.33	206.211	188.424	394.876	-5.16592	0.626864	1.70935e-16	3.18279e-15	chr2	28203201	28203406	chr2:28203201-28203406	206	*	Distal Intergenic	Distal Intergenic	2	28049054	28102264	53211	2	541393	NM_001013520	-100937	ENSDARG00000014522	cadherin 6	5.50565	1.08388	1.18608	1.0152	0.833164	1.46298	6.19179	13.6055	13.7367	7.77844	6.56108	1.60862	cdh6_-100937	3.86053	7.42122
cdh6	25.9242	31.8405	10.2966	10.2168	20.3761	399.962	708.137	590.918	2151.33	206.211	188.424	394.876	-5.16592	0.626864	1.70935e-16	3.18279e-15	chr2	28203442	28203839	chr2:28203442-28203839	398	*	Distal Intergenic	Distal Intergenic	2	28049054	28102264	53211	2	541393	NM_001013520	-101178	ENSDARG00000014522	cadherin 6	9.63489	7.58715	11.8608	5.076	4.16582	7.31492	6.19179	17.0069	13.7367	13.1635	22.1436	17.6949	cdh6_-101178	8.60478	16.6847
cdh6	25.9242	31.8405	10.2966	10.2168	20.3761	399.962	708.137	590.918	2151.33	206.211	188.424	394.876	-5.16592	0.626864	1.70935e-16	3.18279e-15	chr2	28204071	28204272	chr2:28204071-28204272	202	*	Distal Intergenic	Distal Intergenic	2	28049054	28102264	53211	2	541393	NM_001013520	-101807	ENSDARG00000014522	cadherin 6	1.37641	1.08388	7.11648	4.0608	4.99898	1.46298	13.9315	3.40138	11.2391	8.07761	6.56108	6.4345	cdh6_-101807	4.67906	8.07808
cdh6	25.9242	31.8405	10.2966	10.2168	20.3761	399.962	708.137	590.918	2151.33	206.211	188.424	394.876	-5.16592	0.626864	1.70935e-16	3.18279e-15	chr2	28209566	28210095	chr2:28209566-28210095	530	*	Distal Intergenic	Distal Intergenic	2	28049054	28102264	53211	2	541393	NM_001013520	-107302	ENSDARG00000014522	cadherin 6	83.9612	13.0065	74.723	20.304	19.9959	16.0928	18.5754	15.3062	26.2247	5.98341	4.92081	12.869	cdh6_-107302	32.7456	12.4995
cdh6	25.9242	31.8405	10.2966	10.2168	20.3761	399.962	708.137	590.918	2151.33	206.211	188.424	394.876	-5.16592	0.626864	1.70935e-16	3.18279e-15	chr2	28211550	28211750	chr2:28211550-28211750	201	*	Distal Intergenic	Distal Intergenic	2	28049054	28102264	53211	2	541393	NM_001013520	-109286	ENSDARG00000014522	cadherin 6	1.37641	1.08388	5.9304	11.1672	0.833164	11.7039	9.28769	1.70069	3.74638	7.1801	0.820135	1.60862	cdh6_-109286	5.38541	3.33881
cdh6	25.9242	31.8405	10.2966	10.2168	20.3761	399.962	708.137	590.918	2151.33	206.211	188.424	394.876	-5.16592	0.626864	1.70935e-16	3.18279e-15	chr2	28222987	28223109	chr2:28222987-28223109	123	*	Distal Intergenic	Distal Intergenic	2	28049054	28102264	53211	2	541393	NM_001013520	-120723	ENSDARG00000014522	cadherin 6	15.1405	33.6002	2.37216	1.0152	0.833164	1.46298	1.54795	1.70069	56.1957	13.1635	28.7047	78.8226	cdh6_-120723	7.20911	44.2216
cdh6	25.9242	31.8405	10.2966	10.2168	20.3761	399.962	708.137	590.918	2151.33	206.211	188.424	394.876	-5.16592	0.626864	1.70935e-16	3.18279e-15	chr2	28232813	28233214	chr2:28232813-28233214	402	*	Distal Intergenic	Distal Intergenic	2	28049054	28102264	53211	2	541393	NM_001013520	-130549	ENSDARG00000014522	cadherin 6	214.72	152.827	390.22	365.472	156.635	185.799	100.617	124.15	14.9855	9.27429	8.20135	24.1294	cdh6_-130549	211.305	14.1476
cdh6	25.9242	31.8405	10.2966	10.2168	20.3761	399.962	708.137	590.918	2151.33	206.211	188.424	394.876	-5.16592	0.626864	1.70935e-16	3.18279e-15	chr2	28242495	28242817	chr2:28242495-28242817	323	*	Distal Intergenic	Distal Intergenic	2	28049054	28102264	53211	2	541393	NM_001013520	-140231	ENSDARG00000014522	cadherin 6	4.12924	3.25164	5.9304	11.1672	23.3286	4.38895	15.4795	11.9048	6.24397	6.58176	7.38122	3.21725	cdh6_-140231	9.94754	5.85605
cdh6	25.9242	31.8405	10.2966	10.2168	20.3761	399.962	708.137	590.918	2151.33	206.211	188.424	394.876	-5.16592	0.626864	1.70935e-16	3.18279e-15	chr2	28253567	28253750	chr2:28253567-28253750	184	*	Distal Intergenic	Distal Intergenic	2	28049054	28102264	53211	2	541393	NM_001013520	-151303	ENSDARG00000014522	cadherin 6	1.37641	2.16776	5.9304	6.0912	7.49848	1.46298	4.64384	5.10206	11.2391	8.37678	4.10068	4.82587	cdh6_-151303	4.28414	7.13562
cdh6	25.9242	31.8405	10.2966	10.2168	20.3761	399.962	708.137	590.918	2151.33	206.211	188.424	394.876	-5.16592	0.626864	1.70935e-16	3.18279e-15	chr2	28271746	28271928	chr2:28271746-28271928	183	*	Distal Intergenic	Distal Intergenic	2	28049054	28102264	53211	2	541393	NM_001013520	-169482	ENSDARG00000014522	cadherin 6	8.25847	1.08388	1.18608	2.0304	4.16582	1.46298	10.8356	10.2041	1.24879	5.0859	0.820135	3.21725	cdh6_-169482	4.90343	2.59302
cdh6	25.9242	31.8405	10.2966	10.2168	20.3761	399.962	708.137	590.918	2151.33	206.211	188.424	394.876	-5.16592	0.626864	1.70935e-16	3.18279e-15	chr2	28282116	28282422	chr2:28282116-28282422	307	*	Distal Intergenic	Distal Intergenic	2	28049054	28102264	53211	2	541393	NM_001013520	-179852	ENSDARG00000014522	cadherin 6	28.9047	1.08388	54.5597	50.76	143.304	24.8707	40.2466	8.50344	1.24879	2.09419	8.20135	1.60862	cdh6_-179852	44.0292	3.28824
cdh6	25.9242	31.8405	10.2966	10.2168	20.3761	399.962	708.137	590.918	2151.33	206.211	188.424	394.876	-5.16592	0.626864	1.70935e-16	3.18279e-15	chr2	28316964	28317335	chr2:28316964-28317335	372	*	Distal Intergenic	Distal Intergenic	2	28049054	28102264	53211	2	541393	NM_001013520	-214700	ENSDARG00000014522	cadherin 6	26.1518	14.0904	53.3736	17.2584	50.823	4.38895	21.6713	15.3062	4.99517	8.07761	2.46041	1.60862	cdh6_-214700	25.383	4.28545
cdh6	25.9242	31.8405	10.2966	10.2168	20.3761	399.962	708.137	590.918	2151.33	206.211	188.424	394.876	-5.16592	0.626864	1.70935e-16	3.18279e-15	chr2	28318824	28319075	chr2:28318824-28319075	252	*	Distal Intergenic	Distal Intergenic	2	28049054	28102264	53211	2	541393	NM_001013520	-216560	ENSDARG00000014522	cadherin 6	12.3877	1.08388	1.18608	10.152	14.1638	1.46298	9.28769	10.2041	8.74155	13.1635	6.56108	1.60862	cdh6_-216560	7.49103	7.51869
cdh6	25.9242	31.8405	10.2966	10.2168	20.3761	399.962	708.137	590.918	2151.33	206.211	188.424	394.876	-5.16592	0.626864	1.70935e-16	3.18279e-15	chr2	28322105	28322472	chr2:28322105-28322472	368	*	Distal Intergenic	Distal Intergenic	2	28049054	28102264	53211	2	541393	NM_001013520	-219841	ENSDARG00000014522	cadherin 6	6.88206	11.9227	15.419	11.1672	17.4964	4.38895	37.1508	10.2041	12.4879	13.7619	13.1222	16.0862	cdh6_-219841	14.3289	13.8645
cdh6	25.9242	31.8405	10.2966	10.2168	20.3761	399.962	708.137	590.918	2151.33	206.211	188.424	394.876	-5.16592	0.626864	1.70935e-16	3.18279e-15	chr2	28322948	28323224	chr2:28322948-28323224	277	*	Distal Intergenic	Distal Intergenic	2	28049054	28102264	53211	2	541393	NM_001013520	-220684	ENSDARG00000014522	cadherin 6	12.3877	3.25164	1.18608	15.228	22.4954	1.46298	1.54795	8.50344	6.24397	7.47927	16.4027	4.82587	cdh6_-220684	8.2579	8.73795
cdh6	25.9242	31.8405	10.2966	10.2168	20.3761	399.962	708.137	590.918	2151.33	206.211	188.424	394.876	-5.16592	0.626864	1.70935e-16	3.18279e-15	chr2	28346786	28347016	chr2:28346786-28347016	231	*	Distal Intergenic	Distal Intergenic	2	28049054	28102264	53211	2	541393	NM_001013520	-244522	ENSDARG00000014522	cadherin 6	2.75282	3.25164	15.419	5.076	7.49848	2.92597	12.3836	1.70069	8.74155	7.47927	11.4819	14.4776	cdh6_-244522	6.37603	10.5451
cdh6	25.9242	31.8405	10.2966	10.2168	20.3761	399.962	708.137	590.918	2151.33	206.211	188.424	394.876	-5.16592	0.626864	1.70935e-16	3.18279e-15	chr2	28349157	28349768	chr2:28349157-28349768	612	*	Distal Intergenic	Distal Intergenic	2	28049054	28102264	53211	2	541393	NM_001013520	-246893	ENSDARG00000014522	cadherin 6	41.2924	37.9357	92.5142	143.143	136.639	42.4266	116.096	73.1296	13.7367	10.471	13.9423	17.6949	cdh6_-246893	85.3971	13.9612
cdh6	25.9242	31.8405	10.2966	10.2168	20.3761	399.962	708.137	590.918	2151.33	206.211	188.424	394.876	-5.16592	0.626864	1.70935e-16	3.18279e-15	chr2	28350915	28351043	chr2:28350915-28351043	129	*	Distal Intergenic	Distal Intergenic	2	28049054	28102264	53211	2	541393	NM_001013520	-248651	ENSDARG00000014522	cadherin 6	9.63489	20.5937	8.30256	13.1976	19.1628	13.1669	7.73974	18.7076	16.2343	17.6511	12.302	8.04312	cdh6_-248651	13.8132	13.5576
cdh6	25.9242	31.8405	10.2966	10.2168	20.3761	399.962	708.137	590.918	2151.33	206.211	188.424	394.876	-5.16592	0.626864	1.70935e-16	3.18279e-15	chr2	28351426	28351558	chr2:28351426-28351558	133	*	Distal Intergenic	Distal Intergenic	2	28049054	28102264	53211	2	541393	NM_001013520	-249162	ENSDARG00000014522	cadherin 6	12.3877	29.2647	27.2798	13.1976	27.4944	16.0928	20.1233	28.9117	21.2295	27.2245	17.2228	59.5191	cdh6_-249162	21.844	31.299
cdh6	25.9242	31.8405	10.2966	10.2168	20.3761	399.962	708.137	590.918	2151.33	206.211	188.424	394.876	-5.16592	0.626864	1.70935e-16	3.18279e-15	chr2	28375884	28376058	chr2:28375884-28376058	175	*	Distal Intergenic	Distal Intergenic	2	28049054	28102264	53211	2	541393	NM_001013520	-273620	ENSDARG00000014522	cadherin 6	1.37641	1.08388	1.18608	3.0456	8.33164	1.46298	1.54795	1.70069	11.2391	3.59005	2.46041	11.2604	cdh6_-273620	2.4669	7.13749
cdh6	25.9242	31.8405	10.2966	10.2168	20.3761	399.962	708.137	590.918	2151.33	206.211	188.424	394.876	-5.16592	0.626864	1.70935e-16	3.18279e-15	chr2	28377061	28377250	chr2:28377061-28377250	190	*	Distal Intergenic	Distal Intergenic	2	28049054	28102264	53211	2	541393	NM_001013520	-274797	ENSDARG00000014522	cadherin 6	4.12924	7.58715	1.18608	1.0152	0.833164	1.46298	6.19179	5.10206	9.99034	6.58176	6.56108	12.869	cdh6_-274797	3.43846	9.00054
cdh6	25.9242	31.8405	10.2966	10.2168	20.3761	399.962	708.137	590.918	2151.33	206.211	188.424	394.876	-5.16592	0.626864	1.70935e-16	3.18279e-15	chr2	28385139	28385349	chr2:28385139-28385349	211	*	Distal Intergenic	Distal Intergenic	2	28049054	28102264	53211	2	541393	NM_001013520	-282875	ENSDARG00000014522	cadherin 6	1.37641	1.08388	1.18608	5.076	4.16582	13.1669	23.2192	5.10206	7.49276	10.1718	4.10068	1.60862	cdh6_-282875	6.79704	5.84347
cdon	575.374	115.99	365.185	1144.96	246.485	148.823	90.1666	178.161	313.335	41.2422	310.777	320.954	1.43987	0.613712	0.0189678	0.0432037	chr18	44053443	44053688	chr18:44053443-44053688	246	*	3' UTR	3' UTR	18	44053013	44129028	76016	2	280652	NM_001081628	75340	ENSDARG00000061328	cell adhesion associated, oncogene regulated	6.88206	4.33551	7.11648	11.1672	2.49949	2.92597	6.19179	15.3062	4.99517	9.57346	5.74095	3.21725	cdon_75340	7.05309	5.88171
cdon	575.374	115.99	365.185	1144.96	246.485	148.823	90.1666	178.161	313.335	41.2422	310.777	320.954	1.43987	0.613712	0.0189678	0.0432037	chr18	44057020	44057189	chr18:44057020-44057189	170	*	Exon (NM_001081628/280652, exon 18 of 19)	Exon	18	44053013	44129028	76016	2	280652	NM_001081628	71839	ENSDARG00000061328	cell adhesion associated, oncogene regulated	5.50565	11.9227	5.9304	3.0456	1.66633	2.92597	7.73974	6.80275	12.4879	4.18839	0.820135	1.60862	cdon_71839	5.69239	4.77627
cdon	575.374	115.99	365.185	1144.96	246.485	148.823	90.1666	178.161	313.335	41.2422	310.777	320.954	1.43987	0.613712	0.0189678	0.0432037	chr18	44058509	44058715	chr18:44058509-44058715	207	*	Intron (NM_001081628/280652, intron 17 of 18)	Intron	18	44053013	44129028	76016	2	280652	NM_001081628	70313	ENSDARG00000061328	cell adhesion associated, oncogene regulated	17.8934	4.33551	1.18608	5.076	2.49949	5.85194	1.54795	1.70069	4.99517	5.68424	4.92081	3.21725	cdon_70313	5.01138	4.70437
cdon	575.374	115.99	365.185	1144.96	246.485	148.823	90.1666	178.161	313.335	41.2422	310.777	320.954	1.43987	0.613712	0.0189678	0.0432037	chr18	44062236	44062544	chr18:44062236-44062544	309	*	Intron (NM_001081628/280652, intron 17 of 18)	Intron	18	44053013	44129028	76016	2	280652	NM_001081628	66484	ENSDARG00000061328	cell adhesion associated, oncogene regulated	20.6462	29.2647	14.233	8.12161	6.66531	16.0928	9.28769	15.3062	3.74638	7.77844	9.02149	6.4345	cdon_66484	14.9522	6.7452
cdon	575.374	115.99	365.185	1144.96	246.485	148.823	90.1666	178.161	313.335	41.2422	310.777	320.954	1.43987	0.613712	0.0189678	0.0432037	chr18	44065017	44065189	chr18:44065017-44065189	173	*	Exon (NM_001081628/280652, exon 16 of 19)	Exon	18	44053013	44129028	76016	2	280652	NM_001081628	63839	ENSDARG00000061328	cell adhesion associated, oncogene regulated	1.37641	5.41939	17.7912	5.076	4.99898	4.38895	9.28769	5.10206	11.2391	7.47927	3.28054	4.82587	cdon_63839	6.68009	6.7062
cdon	575.374	115.99	365.185	1144.96	246.485	148.823	90.1666	178.161	313.335	41.2422	310.777	320.954	1.43987	0.613712	0.0189678	0.0432037	chr18	44067986	44068256	chr18:44067986-44068256	271	*	Exon (NM_001081628/280652, exon 15 of 19)	Exon	18	44053013	44129028	76016	2	280652	NM_001081628	60772	ENSDARG00000061328	cell adhesion associated, oncogene regulated	9.63489	17.3421	8.30256	3.0456	11.6643	5.85194	17.0274	8.50344	3.74638	4.78673	18.043	4.82587	cdon_60772	10.1715	7.85049
cdon	575.374	115.99	365.185	1144.96	246.485	148.823	90.1666	178.161	313.335	41.2422	310.777	320.954	1.43987	0.613712	0.0189678	0.0432037	chr18	44071023	44071574	chr18:44071023-44071574	552	*	Exon (NM_001081628/280652, exon 14 of 19)	Exon	18	44053013	44129028	76016	2	280652	NM_001081628	57454	ENSDARG00000061328	cell adhesion associated, oncogene regulated	122.501	128.982	250.263	106.596	52.4893	76.0752	46.4384	52.7213	8.74155	13.7619	9.02149	35.3897	cdon_57454	104.508	16.7287
cdon	575.374	115.99	365.185	1144.96	246.485	148.823	90.1666	178.161	313.335	41.2422	310.777	320.954	1.43987	0.613712	0.0189678	0.0432037	chr18	44073135	44073311	chr18:44073135-44073311	177	*	Intron (NM_001081628/280652, intron 13 of 18)	Intron	18	44053013	44129028	76016	2	280652	NM_001081628	55717	ENSDARG00000061328	cell adhesion associated, oncogene regulated	35.7867	2.16776	5.9304	9.13681	5.83215	7.31492	1.54795	1.70069	1.24879	5.0859	3.28054	1.60862	cdon_55717	8.67717	2.80596
cdon	575.374	115.99	365.185	1144.96	246.485	148.823	90.1666	178.161	313.335	41.2422	310.777	320.954	1.43987	0.613712	0.0189678	0.0432037	chr18	44080642	44080805	chr18:44080642-44080805	164	*	Exon (NM_001081628/280652, exon 11 of 19)	Exon	18	44053013	44129028	76016	2	280652	NM_001081628	48223	ENSDARG00000061328	cell adhesion associated, oncogene regulated	4.12924	5.41939	5.9304	3.0456	0.833164	1.46298	4.64384	1.70069	2.49759	6.58176	10.6618	4.82587	cdon_48223	3.39566	6.14174
cdon	575.374	115.99	365.185	1144.96	246.485	148.823	90.1666	178.161	313.335	41.2422	310.777	320.954	1.43987	0.613712	0.0189678	0.0432037	chr18	44081773	44081945	chr18:44081773-44081945	173	*	Intron (NM_001081628/280652, intron 10 of 18)	Intron	18	44053013	44129028	76016	2	280652	NM_001081628	47083	ENSDARG00000061328	cell adhesion associated, oncogene regulated	5.50565	3.25164	1.18608	3.0456	0.833164	4.38895	1.54795	1.70069	4.99517	6.88093	4.92081	16.0862	cdon_47083	2.68247	8.22079
cdon	575.374	115.99	365.185	1144.96	246.485	148.823	90.1666	178.161	313.335	41.2422	310.777	320.954	1.43987	0.613712	0.0189678	0.0432037	chr18	44082197	44082434	chr18:44082197-44082434	238	*	Intron (NM_001081628/280652, intron 10 of 18)	Intron	18	44053013	44129028	76016	2	280652	NM_001081628	46594	ENSDARG00000061328	cell adhesion associated, oncogene regulated	1.37641	5.41939	7.11648	3.0456	5.83215	13.1669	1.54795	6.80275	13.7367	10.7701	9.84162	6.4345	cdon_46594	5.53845	10.1957
cdon	575.374	115.99	365.185	1144.96	246.485	148.823	90.1666	178.161	313.335	41.2422	310.777	320.954	1.43987	0.613712	0.0189678	0.0432037	chr18	44090847	44091104	chr18:44090847-44091104	258	*	Intron (NM_001081628/280652, intron 8 of 18)	Intron	18	44053013	44129028	76016	2	280652	NM_001081628	37924	ENSDARG00000061328	cell adhesion associated, oncogene regulated	9.63489	7.58715	52.1875	13.1976	14.997	7.31492	1.54795	8.50344	3.74638	2.09419	7.38122	11.2604	cdon_37924	14.3713	6.12054
cdon	575.374	115.99	365.185	1144.96	246.485	148.823	90.1666	178.161	313.335	41.2422	310.777	320.954	1.43987	0.613712	0.0189678	0.0432037	chr18	44091325	44091572	chr18:44091325-44091572	248	*	Exon (NM_001081628/280652, exon 8 of 19)	Exon	18	44053013	44129028	76016	2	280652	NM_001081628	37456	ENSDARG00000061328	cell adhesion associated, oncogene regulated	9.63489	11.9227	8.30256	7.10641	4.16582	1.46298	10.8356	11.9048	16.2343	5.98341	1.64027	12.869	cdon_37456	8.16697	9.18175
cdon	575.374	115.99	365.185	1144.96	246.485	148.823	90.1666	178.161	313.335	41.2422	310.777	320.954	1.43987	0.613712	0.0189678	0.0432037	chr18	44093771	44093963	chr18:44093771-44093963	193	*	Intron (NM_001081628/280652, intron 7 of 18)	Intron	18	44053013	44129028	76016	2	280652	NM_001081628	35065	ENSDARG00000061328	cell adhesion associated, oncogene regulated	4.12924	1.08388	16.6051	15.228	0.833164	1.46298	7.73974	18.7076	4.99517	5.68424	0.820135	4.82587	cdon_35065	8.22371	4.08136
cdon	575.374	115.99	365.185	1144.96	246.485	148.823	90.1666	178.161	313.335	41.2422	310.777	320.954	1.43987	0.613712	0.0189678	0.0432037	chr18	44098551	44098948	chr18:44098551-44098948	398	*	Intron (NM_001081628/280652, intron 7 of 18)	Intron	18	44053013	44129028	76016	2	280652	NM_001081628	30080	ENSDARG00000061328	cell adhesion associated, oncogene regulated	22.0226	14.0904	24.9077	23.3496	7.49848	1.46298	4.64384	10.2041	8.74155	16.7536	9.84162	9.65175	cdon_30080	13.5225	11.2471
cdon	575.374	115.99	365.185	1144.96	246.485	148.823	90.1666	178.161	313.335	41.2422	310.777	320.954	1.43987	0.613712	0.0189678	0.0432037	chr18	44102007	44102135	chr18:44102007-44102135	129	*	Exon (NM_001081628/280652, exon 4 of 19)	Exon	18	44053013	44129028	76016	2	280652	NM_001081628	26893	ENSDARG00000061328	cell adhesion associated, oncogene regulated	30.2811	20.5937	3.55824	3.0456	0.833164	1.46298	1.54795	8.50344	46.2053	15.856	20.5034	64.345	cdon_26893	8.72827	36.7274
cdon	575.374	115.99	365.185	1144.96	246.485	148.823	90.1666	178.161	313.335	41.2422	310.777	320.954	1.43987	0.613712	0.0189678	0.0432037	chr18	44102633	44102861	chr18:44102633-44102861	229	*	Intron (NM_001081628/280652, intron 3 of 18)	Intron	18	44053013	44129028	76016	2	280652	NM_001081628	26167	ENSDARG00000061328	cell adhesion associated, oncogene regulated	6.88206	4.33551	1.18608	5.076	2.49949	1.46298	7.73974	1.70069	18.7319	10.7701	9.84162	4.82587	cdon_26167	3.86032	11.0424
cdon	575.374	115.99	365.185	1144.96	246.485	148.823	90.1666	178.161	313.335	41.2422	310.777	320.954	1.43987	0.613712	0.0189678	0.0432037	chr18	44103763	44104276	chr18:44103763-44104276	514	*	Intron (NM_001081628/280652, intron 3 of 18)	Intron	18	44053013	44129028	76016	2	280652	NM_001081628	24752	ENSDARG00000061328	cell adhesion associated, oncogene regulated	125.254	195.098	246.705	199.995	96.647	117.039	23.2192	23.8096	8.74155	7.47927	26.2443	8.04312	cdon_24752	128.471	12.6271
cdon	575.374	115.99	365.185	1144.96	246.485	148.823	90.1666	178.161	313.335	41.2422	310.777	320.954	1.43987	0.613712	0.0189678	0.0432037	chr18	44104352	44104655	chr18:44104352-44104655	304	*	Exon (NM_001081628/280652, exon 3 of 19)	Exon	18	44053013	44129028	76016	2	280652	NM_001081628	24373	ENSDARG00000061328	cell adhesion associated, oncogene regulated	4.12924	16.2582	22.5355	19.2888	10.8311	7.31492	20.1233	15.3062	4.99517	12.8643	10.6618	14.4776	cdon_24373	14.4734	10.7497
cdon	575.374	115.99	365.185	1144.96	246.485	148.823	90.1666	178.161	313.335	41.2422	310.777	320.954	1.43987	0.613712	0.0189678	0.0432037	chr18	44107342	44107578	chr18:44107342-44107578	237	*	Intron (NM_001081628/280652, intron 1 of 18)	Intron	18	44053013	44129028	76016	2	280652	NM_001081628	21450	ENSDARG00000061328	cell adhesion associated, oncogene regulated	15.1405	21.6776	37.9545	34.5168	8.33164	21.9448	23.2192	5.10206	7.49276	6.58176	13.9423	6.4345	cdon_21450	20.9859	8.61283
cdon	575.374	115.99	365.185	1144.96	246.485	148.823	90.1666	178.161	313.335	41.2422	310.777	320.954	1.43987	0.613712	0.0189678	0.0432037	chr18	44115186	44115670	chr18:44115186-44115670	485	*	Intron (NM_001081628/280652, intron 1 of 18)	Intron	18	44053013	44129028	76016	2	280652	NM_001081628	13358	ENSDARG00000061328	cell adhesion associated, oncogene regulated	133.512	132.233	610.831	476.129	350.762	348.19	187.302	115.647	27.4734	11.6677	14.7624	9.65175	cdon_13358	294.326	15.8888
cdon	575.374	115.99	365.185	1144.96	246.485	148.823	90.1666	178.161	313.335	41.2422	310.777	320.954	1.43987	0.613712	0.0189678	0.0432037	chr18	44115920	44116129	chr18:44115920-44116129	210	*	Intron (NM_001081628/280652, intron 1 of 18)	Intron	18	44053013	44129028	76016	2	280652	NM_001081628	12899	ENSDARG00000061328	cell adhesion associated, oncogene regulated	70.197	26.0131	83.0256	68.0185	74.1516	67.2973	58.822	8.50344	14.9855	9.27429	9.84162	4.82587	cdon_12899	57.0036	9.73183
cdon	575.374	115.99	365.185	1144.96	246.485	148.823	90.1666	178.161	313.335	41.2422	310.777	320.954	1.43987	0.613712	0.0189678	0.0432037	chr18	44118074	44118738	chr18:44118074-44118738	665	*	Intron (NM_001081628/280652, intron 1 of 18)	Intron	18	44053013	44129028	76016	2	280652	NM_001081628	10290	ENSDARG00000061328	cell adhesion associated, oncogene regulated	465.227	422.713	1353.32	670.033	744.016	346.727	442.713	204.083	26.2247	7.77844	14.7624	17.6949	cdon_10290	581.103	16.6151
cdon	575.374	115.99	365.185	1144.96	246.485	148.823	90.1666	178.161	313.335	41.2422	310.777	320.954	1.43987	0.613712	0.0189678	0.0432037	chr18	44120030	44120219	chr18:44120030-44120219	190	*	Intron (NM_001081628/280652, intron 1 of 18)	Intron	18	44053013	44129028	76016	2	280652	NM_001081628	8809	ENSDARG00000061328	cell adhesion associated, oncogene regulated	35.7867	31.4325	13.0469	7.10641	26.6613	2.92597	1.54795	10.2041	46.2053	13.7619	23.7839	70.7795	cdon_8809	16.089	38.6326
cdon	575.374	115.99	365.185	1144.96	246.485	148.823	90.1666	178.161	313.335	41.2422	310.777	320.954	1.43987	0.613712	0.0189678	0.0432037	chr18	44128840	44129454	chr18:44128840-44129454	615	*	Promoter (<=1kb)	Promoter	18	44053013	44129028	76016	2	280652	NM_001081628	0	ENSDARG00000061328	cell adhesion associated, oncogene regulated	257.389	105.136	402.081	208.116	152.469	133.132	100.617	17.0069	41.2102	24.8312	41.0068	53.0846	cdon_0	171.993	40.0332
cdon	575.374	115.99	365.185	1144.96	246.485	148.823	90.1666	178.161	313.335	41.2422	310.777	320.954	1.43987	0.613712	0.0189678	0.0432037	chr18	44131051	44131184	chr18:44131051-44131184	134	*	Promoter (2-3kb)	Promoter	18	44053013	44129028	76016	2	280652	NM_001081628	-2023	ENSDARG00000061328	cell adhesion associated, oncogene regulated	46.798	43.3551	7.11648	5.076	7.49848	13.1669	1.54795	1.70069	48.7029	17.9502	35.2658	93.3002	cdon_-2023	15.7825	48.8048
cdon	575.374	115.99	365.185	1144.96	246.485	148.823	90.1666	178.161	313.335	41.2422	310.777	320.954	1.43987	0.613712	0.0189678	0.0432037	chr18	44135020	44135617	chr18:44135020-44135617	598	*	Distal Intergenic	Distal Intergenic	18	44053013	44129028	76016	2	280652	NM_001081628	-5992	ENSDARG00000061328	cell adhesion associated, oncogene regulated	11.0113	8.67103	24.9077	16.2432	13.3306	10.2409	26.3151	10.2041	11.2391	19.7453	18.043	24.1294	cdon_-5992	15.1155	18.2892
cdon	575.374	115.99	365.185	1144.96	246.485	148.823	90.1666	178.161	313.335	41.2422	310.777	320.954	1.43987	0.613712	0.0189678	0.0432037	chr18	44146943	44147326	chr18:44146943-44147326	384	*	Distal Intergenic	Distal Intergenic	18	44053013	44129028	76016	2	280652	NM_001081628	-17915	ENSDARG00000061328	cell adhesion associated, oncogene regulated	23.399	9.75491	15.419	18.2736	12.4975	8.77791	13.9315	23.8096	16.2343	9.27429	11.4819	11.2604	cdon_-17915	15.7329	12.0627
cdon	575.374	115.99	365.185	1144.96	246.485	148.823	90.1666	178.161	313.335	41.2422	310.777	320.954	1.43987	0.613712	0.0189678	0.0432037	chr18	44152655	44153020	chr18:44152655-44153020	366	*	Distal Intergenic	Distal Intergenic	18	44053013	44129028	76016	2	280652	NM_001081628	-23627	ENSDARG00000061328	cell adhesion associated, oncogene regulated	48.1744	7.58715	84.2116	14.2128	13.3306	11.7039	15.4795	6.80275	8.74155	6.88093	9.02149	14.4776	cdon_-23627	25.1878	9.7804
cdon	575.374	115.99	365.185	1144.96	246.485	148.823	90.1666	178.161	313.335	41.2422	310.777	320.954	1.43987	0.613712	0.0189678	0.0432037	chr18	44156483	44156647	chr18:44156483-44156647	165	*	Distal Intergenic	Distal Intergenic	18	44053013	44129028	76016	2	280652	NM_001081628	-27455	ENSDARG00000061328	cell adhesion associated, oncogene regulated	4.12924	7.58715	13.0469	7.10641	6.66531	2.92597	6.19179	13.6055	4.99517	7.47927	1.64027	4.82587	cdon_-27455	7.65728	4.73515
cdon	575.374	115.99	365.185	1144.96	246.485	148.823	90.1666	178.161	313.335	41.2422	310.777	320.954	1.43987	0.613712	0.0189678	0.0432037	chr18	44160125	44160468	chr18:44160125-44160468	344	*	Distal Intergenic	Distal Intergenic	18	44053013	44129028	76016	2	280652	NM_001081628	-31097	ENSDARG00000061328	cell adhesion associated, oncogene regulated	1.37641	8.67103	11.8608	3.0456	4.16582	13.1669	29.411	1.70069	11.2391	10.1718	24.6041	9.65175	cdon_-31097	9.17478	13.9167
cdon	575.374	115.99	365.185	1144.96	246.485	148.823	90.1666	178.161	313.335	41.2422	310.777	320.954	1.43987	0.613712	0.0189678	0.0432037	chr18	44161832	44162156	chr18:44161832-44162156	325	*	Distal Intergenic	Distal Intergenic	18	44053013	44129028	76016	2	280652	NM_001081628	-32804	ENSDARG00000061328	cell adhesion associated, oncogene regulated	17.8934	11.9227	22.5355	9.13681	7.49848	5.85194	4.64384	15.3062	1.24879	7.47927	17.2228	12.869	cdon_-32804	11.8486	9.70497
cdon	575.374	115.99	365.185	1144.96	246.485	148.823	90.1666	178.161	313.335	41.2422	310.777	320.954	1.43987	0.613712	0.0189678	0.0432037	chr18	44166339	44166589	chr18:44166339-44166589	251	*	Distal Intergenic	Distal Intergenic	18	44053013	44129028	76016	2	280652	NM_001081628	-37311	ENSDARG00000061328	cell adhesion associated, oncogene regulated	5.50565	4.33551	1.18608	3.0456	1.66633	4.38895	10.8356	1.70069	6.24397	5.68424	13.9423	16.0862	cdon_-37311	4.08306	10.4892
cdon	575.374	115.99	365.185	1144.96	246.485	148.823	90.1666	178.161	313.335	41.2422	310.777	320.954	1.43987	0.613712	0.0189678	0.0432037	chr18	44169159	44169600	chr18:44169159-44169600	442	*	Distal Intergenic	Distal Intergenic	18	44053013	44129028	76016	2	280652	NM_001081628	-40131	ENSDARG00000061328	cell adhesion associated, oncogene regulated	8.25847	19.5098	42.6989	21.3192	10.8311	19.0188	20.1233	18.7076	11.2391	8.37678	15.5826	17.6949	cdon_-40131	20.0584	13.2233
cdon	575.374	115.99	365.185	1144.96	246.485	148.823	90.1666	178.161	313.335	41.2422	310.777	320.954	1.43987	0.613712	0.0189678	0.0432037	chr18	44173754	44174105	chr18:44173754-44174105	352	*	Distal Intergenic	Distal Intergenic	18	44053013	44129028	76016	2	280652	NM_001081628	-44726	ENSDARG00000061328	cell adhesion associated, oncogene regulated	24.7754	16.2582	94.8864	19.2888	18.3296	24.8707	15.4795	15.3062	8.74155	7.1801	13.9423	8.04312	cdon_-44726	28.6493	9.47677
cdon	575.374	115.99	365.185	1144.96	246.485	148.823	90.1666	178.161	313.335	41.2422	310.777	320.954	1.43987	0.613712	0.0189678	0.0432037	chr18	44178689	44178959	chr18:44178689-44178959	271	*	Distal Intergenic	Distal Intergenic	18	44053013	44129028	76016	2	280652	NM_001081628	-49661	ENSDARG00000061328	cell adhesion associated, oncogene regulated	4.12924	8.67103	17.7912	11.1672	15.8301	7.31492	29.411	15.3062	6.24397	6.88093	2.46041	8.04312	cdon_-49661	13.7026	5.9071
cdon	575.374	115.99	365.185	1144.96	246.485	148.823	90.1666	178.161	313.335	41.2422	310.777	320.954	1.43987	0.613712	0.0189678	0.0432037	chr18	44180992	44181331	chr18:44180992-44181331	340	*	Distal Intergenic	Distal Intergenic	18	44053013	44129028	76016	2	280652	NM_001081628	-51964	ENSDARG00000061328	cell adhesion associated, oncogene regulated	34.4103	24.9292	28.4659	11.1672	0.833164	10.2409	10.8356	11.9048	11.2391	6.88093	9.84162	6.4345	cdon_-51964	16.5984	8.59905
cdon	575.374	115.99	365.185	1144.96	246.485	148.823	90.1666	178.161	313.335	41.2422	310.777	320.954	1.43987	0.613712	0.0189678	0.0432037	chr18	44185800	44186570	chr18:44185800-44186570	771	*	Distal Intergenic	Distal Intergenic	18	44053013	44129028	76016	2	280652	NM_001081628	-56772	ENSDARG00000061328	cell adhesion associated, oncogene regulated	42.6688	122.478	88.956	56.8512	89.1486	27.7967	15.4795	22.1089	11.2391	13.4627	21.3235	22.5207	cdon_-56772	58.186	17.1365
cdon	575.374	115.99	365.185	1144.96	246.485	148.823	90.1666	178.161	313.335	41.2422	310.777	320.954	1.43987	0.613712	0.0189678	0.0432037	chr18	44194129	44195062	chr18:44194129-44195062	934	*	Distal Intergenic	Distal Intergenic	18	44053013	44129028	76016	2	280652	NM_001081628	-65101	ENSDARG00000061328	cell adhesion associated, oncogene regulated	50.9273	43.3551	93.7003	70.0489	19.9959	21.9448	32.5069	32.3131	21.2295	15.5569	22.1436	30.5639	cdon_-65101	45.599	22.3735
cdon	575.374	115.99	365.185	1144.96	246.485	148.823	90.1666	178.161	313.335	41.2422	310.777	320.954	1.43987	0.613712	0.0189678	0.0432037	chr18	44206393	44206676	chr18:44206393-44206676	284	*	Distal Intergenic	Distal Intergenic	18	44053013	44129028	76016	2	280652	NM_001081628	-77365	ENSDARG00000061328	cell adhesion associated, oncogene regulated	15.1405	5.41939	29.652	1.0152	2.49949	10.2409	9.28769	5.10206	1.24879	2.69254	2.46041	1.60862	cdon_-77365	9.79466	2.00259
cdon	575.374	115.99	365.185	1144.96	246.485	148.823	90.1666	178.161	313.335	41.2422	310.777	320.954	1.43987	0.613712	0.0189678	0.0432037	chr18	44210972	44211568	chr18:44210972-44211568	597	*	Distal Intergenic	Distal Intergenic	18	44053013	44129028	76016	2	280652	NM_001081628	-81944	ENSDARG00000061328	cell adhesion associated, oncogene regulated	38.5395	100.801	258.565	62.9424	84.9827	58.5194	74.3015	20.4083	11.2391	11.0693	21.3235	6.4345	cdon_-81944	87.3825	12.5166
cdon	575.374	115.99	365.185	1144.96	246.485	148.823	90.1666	178.161	313.335	41.2422	310.777	320.954	1.43987	0.613712	0.0189678	0.0432037	chr18	44213811	44214221	chr18:44213811-44214221	411	*	Distal Intergenic	Distal Intergenic	18	44053013	44129028	76016	2	280652	NM_001081628	-84783	ENSDARG00000061328	cell adhesion associated, oncogene regulated	4.12924	20.5937	2.37216	1.0152	4.16582	7.31492	9.28769	6.80275	36.215	8.07761	7.38122	24.1294	cdon_-84783	6.96018	18.9508
cdon	575.374	115.99	365.185	1144.96	246.485	148.823	90.1666	178.161	313.335	41.2422	310.777	320.954	1.43987	0.613712	0.0189678	0.0432037	chr18	44218071	44218818	chr18:44218071-44218818	748	*	Distal Intergenic	Distal Intergenic	18	44053013	44129028	76016	2	280652	NM_001081628	-89043	ENSDARG00000061328	cell adhesion associated, oncogene regulated	12.3877	22.7614	55.7457	29.4408	36.6592	23.4078	12.3836	13.6055	16.2343	22.4378	28.7047	24.1294	cdon_-89043	25.799	22.8766
chga	1.44023	5.30674	0	4.0867	11.174	26.5756	8.79674	0	15.6067	129.618	123.577	29.6529	-3.5223	1.16323	0.0024616	0.00730517	chr20	27013668	27014001	chr20:27013668-27014001	334	*	Distal Intergenic	Distal Intergenic	20	27020201	27046006	25806	1	450039	NM_001006059	-6200	ENSDARG00000008829	chromogranin A	9.63489	7.58715	3.55824	2.0304	14.1638	13.1669	1.54795	5.10206	12.4879	8.07761	7.38122	4.82587	chga_-6200	7.09892	8.19316
chga	1.44023	5.30674	0	4.0867	11.174	26.5756	8.79674	0	15.6067	129.618	123.577	29.6529	-3.5223	1.16323	0.0024616	0.00730517	chr20	27020328	27020441	chr20:27020328-27020441	114	*	Promoter (<=1kb)	Promoter	20	27020201	27046006	25806	1	450039	NM_001006059	127	ENSDARG00000008829	chromogranin A	1.37641	4.33551	11.8608	4.0608	3.33266	1.46298	1.54795	1.70069	3.74638	4.18839	5.74095	3.21725	chga_127	3.70973	4.22324
chga	1.44023	5.30674	0	4.0867	11.174	26.5756	8.79674	0	15.6067	129.618	123.577	29.6529	-3.5223	1.16323	0.0024616	0.00730517	chr20	27020495	27020640	chr20:27020495-27020640	146	*	Promoter (<=1kb)	Promoter	20	27020201	27046006	25806	1	450039	NM_001006059	294	ENSDARG00000008829	chromogranin A	5.50565	6.50327	11.8608	2.0304	6.66531	5.85194	9.28769	3.40138	4.99517	7.1801	6.56108	4.82587	chga_294	6.3883	5.89056
chga	1.44023	5.30674	0	4.0867	11.174	26.5756	8.79674	0	15.6067	129.618	123.577	29.6529	-3.5223	1.16323	0.0024616	0.00730517	chr20	27022061	27022179	chr20:27022061-27022179	119	*	Promoter (1-2kb)	Promoter	20	27020201	27046006	25806	1	450039	NM_001006059	1860	ENSDARG00000008829	chromogranin A	1.37641	4.33551	4.74432	1.0152	4.16582	1.46298	4.64384	1.70069	8.74155	8.07761	9.02149	14.4776	chga_1860	2.9306	10.0796
chga	1.44023	5.30674	0	4.0867	11.174	26.5756	8.79674	0	15.6067	129.618	123.577	29.6529	-3.5223	1.16323	0.0024616	0.00730517	chr20	27030963	27031141	chr20:27030963-27031141	179	*	Intron (NM_001006059/450039, intron 5 of 7)	Intron	20	27020201	27046006	25806	1	450039	NM_001006059	10762	ENSDARG00000008829	chromogranin A	11.0113	5.41939	18.9773	11.1672	4.16582	10.2409	6.19179	3.40138	1.24879	5.68424	4.92081	8.04312	chga_10762	8.82188	4.97424
chga	1.44023	5.30674	0	4.0867	11.174	26.5756	8.79674	0	15.6067	129.618	123.577	29.6529	-3.5223	1.16323	0.0024616	0.00730517	chr20	27032747	27032935	chr20:27032747-27032935	189	*	Intron (NM_001006059/450039, intron 5 of 7)	Intron	20	27020201	27046006	25806	1	450039	NM_001006059	12546	ENSDARG00000008829	chromogranin A	4.12924	9.75491	1.18608	9.13681	0.833164	1.46298	1.54795	3.40138	13.7367	3.59005	9.84162	3.21725	chga_12546	3.93156	7.59641
chga	1.44023	5.30674	0	4.0867	11.174	26.5756	8.79674	0	15.6067	129.618	123.577	29.6529	-3.5223	1.16323	0.0024616	0.00730517	chr20	27037476	27037929	chr20:27037476-27037929	454	*	Intron (NM_001006059/450039, intron 6 of 7)	Intron	20	27020201	27046006	25806	1	450039	NM_001006059	17275	ENSDARG00000008829	chromogranin A	119.748	18.4259	148.26	39.5928	33.3266	7.31492	10.8356	6.80275	11.2391	10.1718	14.7624	1.60862	chga_17275	48.0383	9.4455
chga	1.44023	5.30674	0	4.0867	11.174	26.5756	8.79674	0	15.6067	129.618	123.577	29.6529	-3.5223	1.16323	0.0024616	0.00730517	chr20	27039401	27039603	chr20:27039401-27039603	203	*	Exon (NM_001006059/450039, exon 7 of 8)	Exon	20	27020201	27046006	25806	1	450039	NM_001006059	19200	ENSDARG00000008829	chromogranin A	17.8934	7.58715	1.18608	5.076	8.33164	2.92597	1.54795	11.9048	7.49276	5.38507	7.38122	4.82587	chga_19200	7.05662	6.27123
chga	1.44023	5.30674	0	4.0867	11.174	26.5756	8.79674	0	15.6067	129.618	123.577	29.6529	-3.5223	1.16323	0.0024616	0.00730517	chr20	27045474	27045675	chr20:27045474-27045675	202	*	3' UTR	3' UTR	20	27020201	27046006	25806	1	450039	NM_001006059	25273	ENSDARG00000008829	chromogranin A	1.37641	6.50327	1.18608	5.076	1.66633	1.46298	1.54795	11.9048	6.24397	7.1801	2.46041	3.21725	chga_25273	3.84048	4.77543
chsy3	15.8426	36.3891	37.0677	51.0838	61.1282	71.754	24.191	105.126	25.2108	66.2821	52.6119	49.6988	-0.511858	0.505863	0.311609	0.426602	chr10	16592773	16593526	chr10:16592773-16593526	754	*	Promoter (<=1kb)	Promoter	10	16592851	16703757	110907	1	368477	NM_001089348	0	ENSDARG00000069472	chondroitin sulfate synthase 3	66.0678	111.639	170.795	138.067	234.952	131.669	153.247	192.178	39.9614	24.532	46.7477	30.5639	chsy3_0	149.827	35.4512
chsy3	15.8426	36.3891	37.0677	51.0838	61.1282	71.754	24.191	105.126	25.2108	66.2821	52.6119	49.6988	-0.511858	0.505863	0.311609	0.426602	chr10	16624905	16625191	chr10:16624905-16625191	287	*	Intron (NM_001089348/368477, intron 2 of 5)	Intron	10	16592851	16703757	110907	1	368477	NM_001089348	32054	ENSDARG00000069472	chondroitin sulfate synthase 3	34.4103	6.50327	1.18608	3.0456	4.16582	7.31492	1.54795	1.70069	1.24879	6.58176	0.820135	1.60862	chsy3_32054	7.48433	2.56483
chsy3	15.8426	36.3891	37.0677	51.0838	61.1282	71.754	24.191	105.126	25.2108	66.2821	52.6119	49.6988	-0.511858	0.505863	0.311609	0.426602	chr10	16626513	16626633	chr10:16626513-16626633	121	*	Intron (NM_001089348/368477, intron 2 of 5)	Intron	10	16592851	16703757	110907	1	368477	NM_001089348	33662	ENSDARG00000069472	chondroitin sulfate synthase 3	9.63489	29.2647	13.0469	19.2888	32.4934	24.8707	17.0274	32.3131	21.2295	22.4378	30.345	43.4329	chsy3_33662	22.2425	29.3613
chsy3	15.8426	36.3891	37.0677	51.0838	61.1282	71.754	24.191	105.126	25.2108	66.2821	52.6119	49.6988	-0.511858	0.505863	0.311609	0.426602	chr10	16638098	16638239	chr10:16638098-16638239	142	*	Intron (NM_001089348/368477, intron 2 of 5)	Intron	10	16592851	16703757	110907	1	368477	NM_001089348	45247	ENSDARG00000069472	chondroitin sulfate synthase 3	6.88206	8.67103	8.30256	1.0152	4.16582	1.46298	7.73974	13.6055	3.74638	3.88922	2.46041	8.04312	chsy3_45247	6.48061	4.53478
chsy3	15.8426	36.3891	37.0677	51.0838	61.1282	71.754	24.191	105.126	25.2108	66.2821	52.6119	49.6988	-0.511858	0.505863	0.311609	0.426602	chr10	16644308	16644518	chr10:16644308-16644518	211	*	Intron (NM_001089348/368477, intron 2 of 5)	Intron	10	16592851	16703757	110907	1	368477	NM_001089348	51457	ENSDARG00000069472	chondroitin sulfate synthase 3	1.37641	4.33551	1.18608	12.1824	14.1638	1.46298	1.54795	15.3062	8.74155	4.48756	1.64027	3.21725	chsy3_51457	6.44517	4.52166
chsy3	15.8426	36.3891	37.0677	51.0838	61.1282	71.754	24.191	105.126	25.2108	66.2821	52.6119	49.6988	-0.511858	0.505863	0.311609	0.426602	chr10	16651230	16651382	chr10:16651230-16651382	153	*	Intron (NM_001089348/368477, intron 2 of 5)	Intron	10	16592851	16703757	110907	1	368477	NM_001089348	58379	ENSDARG00000069472	chondroitin sulfate synthase 3	12.3877	24.9292	8.30256	7.10641	9.1648	27.7967	35.6028	25.5103	38.7126	24.2328	25.4242	24.1294	chsy3_58379	18.8501	28.1247
chsy3	15.8426	36.3891	37.0677	51.0838	61.1282	71.754	24.191	105.126	25.2108	66.2821	52.6119	49.6988	-0.511858	0.505863	0.311609	0.426602	chr10	16654452	16654867	chr10:16654452-16654867	416	*	Intron (NM_001089348/368477, intron 2 of 5)	Intron	10	16592851	16703757	110907	1	368477	NM_001089348	61601	ENSDARG00000069472	chondroitin sulfate synthase 3	103.231	46.6068	58.1179	19.2888	12.4975	24.8707	4.64384	32.3131	31.2198	16.7536	12.302	24.1294	chsy3_61601	37.6962	21.1012
chsy3	15.8426	36.3891	37.0677	51.0838	61.1282	71.754	24.191	105.126	25.2108	66.2821	52.6119	49.6988	-0.511858	0.505863	0.311609	0.426602	chr10	16658741	16659034	chr10:16658741-16659034	294	*	Intron (NM_001089348/368477, intron 2 of 5)	Intron	10	16592851	16703757	110907	1	368477	NM_001089348	65890	ENSDARG00000069472	chondroitin sulfate synthase 3	12.3877	19.5098	5.9304	4.0608	13.3306	4.38895	1.54795	5.10206	8.74155	15.5569	12.302	19.3035	chsy3_65890	8.28229	13.976
chsy3	15.8426	36.3891	37.0677	51.0838	61.1282	71.754	24.191	105.126	25.2108	66.2821	52.6119	49.6988	-0.511858	0.505863	0.311609	0.426602	chr10	16687766	16687912	chr10:16687766-16687912	147	*	Intron (NM_001089348/368477, intron 2 of 5)	Intron	10	16592851	16703757	110907	1	368477	NM_001089348	94915	ENSDARG00000069472	chondroitin sulfate synthase 3	5.50565	3.25164	1.18608	4.0608	9.99797	13.1669	17.0274	1.70069	12.4879	2.69254	2.46041	6.4345	chsy3_94915	6.98714	6.01884
chsy3	15.8426	36.3891	37.0677	51.0838	61.1282	71.754	24.191	105.126	25.2108	66.2821	52.6119	49.6988	-0.511858	0.505863	0.311609	0.426602	chr10	16690714	16690911	chr10:16690714-16690911	198	*	Intron (NM_001089348/368477, intron 2 of 5)	Intron	10	16592851	16703757	110907	1	368477	NM_001089348	97863	ENSDARG00000069472	chondroitin sulfate synthase 3	11.0113	2.16776	1.18608	1.0152	6.66531	4.38895	13.9315	17.0069	3.74638	7.77844	7.38122	16.0862	chsy3_97863	7.17163	8.74807
chsy3	15.8426	36.3891	37.0677	51.0838	61.1282	71.754	24.191	105.126	25.2108	66.2821	52.6119	49.6988	-0.511858	0.505863	0.311609	0.426602	chr10	16693673	16694055	chr10:16693673-16694055	383	*	Intron (NM_001089348/368477, intron 2 of 5)	Intron	10	16592851	16703757	110907	1	368477	NM_001089348	100822	ENSDARG00000069472	chondroitin sulfate synthase 3	148.653	81.2909	190.959	29.4408	97.4802	10.2409	23.2192	35.7144	16.2343	10.471	4.10068	1.60862	chsy3_100822	77.1247	8.10365
chsy3	15.8426	36.3891	37.0677	51.0838	61.1282	71.754	24.191	105.126	25.2108	66.2821	52.6119	49.6988	-0.511858	0.505863	0.311609	0.426602	chr10	16710138	16710493	chr10:16710138-16710493	356	*	Distal Intergenic	Distal Intergenic	10	16592851	16703757	110907	1	368477	NM_001089348	117287	ENSDARG00000069472	chondroitin sulfate synthase 3	22.0226	13.0065	13.0469	5.076	17.4964	1.46298	3.0959	5.10206	9.99034	6.58176	11.4819	4.82587	chsy3_117287	10.0387	8.21997
chsy3	15.8426	36.3891	37.0677	51.0838	61.1282	71.754	24.191	105.126	25.2108	66.2821	52.6119	49.6988	-0.511858	0.505863	0.311609	0.426602	chr10	16715999	16716118	chr10:16715999-16716118	120	*	Distal Intergenic	Distal Intergenic	10	16592851	16703757	110907	1	368477	NM_001089348	123148	ENSDARG00000069472	chondroitin sulfate synthase 3	17.8934	14.0904	3.55824	1.0152	4.16582	1.46298	4.64384	8.50344	41.2102	3.29088	5.74095	20.9121	chsy3_123148	6.91666	17.7885
chsy3	15.8426	36.3891	37.0677	51.0838	61.1282	71.754	24.191	105.126	25.2108	66.2821	52.6119	49.6988	-0.511858	0.505863	0.311609	0.426602	chr10	16717574	16717692	chr10:16717574-16717692	119	*	Distal Intergenic	Distal Intergenic	10	16592851	16703757	110907	1	368477	NM_001089348	124723	ENSDARG00000069472	chondroitin sulfate synthase 3	1.37641	3.25164	1.18608	1.0152	0.833164	1.46298	1.54795	11.9048	8.74155	5.68424	3.28054	1.60862	chsy3_124723	2.82228	4.82874
chsy3	15.8426	36.3891	37.0677	51.0838	61.1282	71.754	24.191	105.126	25.2108	66.2821	52.6119	49.6988	-0.511858	0.505863	0.311609	0.426602	chr10	16727191	16727311	chr10:16727191-16727311	121	*	Distal Intergenic	Distal Intergenic	10	16592851	16703757	110907	1	368477	NM_001089348	134340	ENSDARG00000069472	chondroitin sulfate synthase 3	1.37641	1.08388	1.18608	1.0152	0.833164	1.46298	1.54795	1.70069	1.24879	6.28258	3.28054	16.0862	chsy3_134340	1.27579	6.72454
chsy3	15.8426	36.3891	37.0677	51.0838	61.1282	71.754	24.191	105.126	25.2108	66.2821	52.6119	49.6988	-0.511858	0.505863	0.311609	0.426602	chr10	16728300	16728714	chr10:16728300-16728714	415	*	Distal Intergenic	Distal Intergenic	10	16592851	16703757	110907	1	368477	NM_001089348	135449	ENSDARG00000069472	chondroitin sulfate synthase 3	16.5169	43.3551	28.4659	25.38	24.1618	19.0188	35.6028	40.8165	13.7367	13.4627	9.84162	9.65175	chsy3_135449	29.1647	11.6732
cited4b	753.963	2599.55	1654.32	4529.43	4409.12	4116.55	6161.01	2133.5	5670.04	3730.94	3966.69	3611.37	-0.623248	0.45532	0.171058	0.265962	chr16	35503318	35503437	chr16:35503318-35503437	120	*	Distal Intergenic	Distal Intergenic	16	35535205	35537491	2287	1	100006037	NM_200078	-31768	ENSDARG00000101009	Cbp/p300-interacting transactivator, with Glu/Asp-rich carboxy-terminal domain, 4b	42.6688	22.7614	1.18608	1.0152	0.833164	1.46298	1.54795	5.10206	46.2053	4.48756	28.7047	46.6501	cited4b_-31768	9.57221	31.5119
cited4b	753.963	2599.55	1654.32	4529.43	4409.12	4116.55	6161.01	2133.5	5670.04	3730.94	3966.69	3611.37	-0.623248	0.45532	0.171058	0.265962	chr16	35534968	35535319	chr16:35534968-35535319	352	*	Promoter (<=1kb)	Promoter	16	35535205	35537491	2287	1	100006037	NM_200078	0	ENSDARG00000101009	Cbp/p300-interacting transactivator, with Glu/Asp-rich carboxy-terminal domain, 4b	28.9047	5.41939	8.30256	6.0912	4.16582	27.7967	10.8356	13.6055	1.24879	2.39337	6.56108	1.60862	cited4b_0	13.1402	2.95297
cited4b	753.963	2599.55	1654.32	4529.43	4409.12	4116.55	6161.01	2133.5	5670.04	3730.94	3966.69	3611.37	-0.623248	0.45532	0.171058	0.265962	chr16	35535374	35535571	chr16:35535374-35535571	198	*	Promoter (<=1kb)	Promoter	16	35535205	35537491	2287	1	100006037	NM_200078	169	ENSDARG00000101009	Cbp/p300-interacting transactivator, with Glu/Asp-rich carboxy-terminal domain, 4b	33.0339	9.75491	24.9077	28.4256	19.1628	21.9448	7.73974	13.6055	11.2391	8.97512	9.02149	8.04312	cited4b_169	19.8219	9.31972
cndp2	1885.99	4388.68	2376.45	2696.54	2222.31	4556.38	5316.53	4665.37	1934.03	1938.38	2332.05	3119.34	-0.349244	0.375552	0.352397	0.469817	chr19	20800961	20801155	chr19:20800961-20801155	195	*	Promoter (<=1kb)	Promoter	19	20801486	20823101	21616	1	327288	NM_214704	-331	ENSDARG00000003931	carnosine dipeptidase 2	39.916	17.3421	37.9545	37.5624	26.6613	24.8707	34.0549	11.9048	6.24397	8.07761	9.02149	1.60862	cndp2_-331	28.7833	6.23792
cndp2	1885.99	4388.68	2376.45	2696.54	2222.31	4556.38	5316.53	4665.37	1934.03	1938.38	2332.05	3119.34	-0.349244	0.375552	0.352397	0.469817	chr19	20801406	20801565	chr19:20801406-20801565	160	*	Promoter (<=1kb)	Promoter	19	20801486	20823101	21616	1	327288	NM_214704	0	ENSDARG00000003931	carnosine dipeptidase 2	13.7641	1.08388	1.18608	6.0912	16.6633	2.92597	1.54795	8.50344	6.24397	1.49585	4.92081	3.21725	cndp2_0	6.47074	3.96947
cndp2	1885.99	4388.68	2376.45	2696.54	2222.31	4556.38	5316.53	4665.37	1934.03	1938.38	2332.05	3119.34	-0.349244	0.375552	0.352397	0.469817	chr19	20801853	20802261	chr19:20801853-20802261	409	*	Promoter (<=1kb)	Promoter	19	20801486	20823101	21616	1	327288	NM_214704	367	ENSDARG00000003931	carnosine dipeptidase 2	31.6575	31.4325	60.4901	45.684	67.4863	42.4266	35.6028	40.8165	3.74638	9.27429	10.6618	1.60862	cndp2_367	44.4495	6.32276
cndp2	1885.99	4388.68	2376.45	2696.54	2222.31	4556.38	5316.53	4665.37	1934.03	1938.38	2332.05	3119.34	-0.349244	0.375552	0.352397	0.469817	chr19	20803705	20803811	chr19:20803705-20803811	107	*	Promoter (2-3kb)	Promoter	19	20801486	20823101	21616	1	327288	NM_214704	2219	ENSDARG00000003931	carnosine dipeptidase 2	1.37641	5.41939	1.18608	5.076	9.99797	1.46298	4.64384	10.2041	7.49276	4.18839	7.38122	1.60862	cndp2_2219	4.92085	5.16775
cndp2	1885.99	4388.68	2376.45	2696.54	2222.31	4556.38	5316.53	4665.37	1934.03	1938.38	2332.05	3119.34	-0.349244	0.375552	0.352397	0.469817	chr19	20815420	20815563	chr19:20815420-20815563	144	*	Intron (NM_214704/327288, intron 9 of 10)	Intron	19	20801486	20823101	21616	1	327288	NM_214704	13934	ENSDARG00000003931	carnosine dipeptidase 2	1.37641	2.16776	1.18608	1.0152	7.49848	1.46298	1.54795	8.50344	1.24879	5.0859	7.38122	1.60862	cndp2_13934	3.09479	3.83113
cndp2	1885.99	4388.68	2376.45	2696.54	2222.31	4556.38	5316.53	4665.37	1934.03	1938.38	2332.05	3119.34	-0.349244	0.375552	0.352397	0.469817	chr19	20826008	20826611	chr19:20826008-20826611	604	*	Distal Intergenic	Distal Intergenic	19	20801486	20823101	21616	1	327288	NM_214704	24522	ENSDARG00000003931	carnosine dipeptidase 2	50.9273	7.58715	14.233	35.532	31.6602	13.1669	32.5069	8.50344	23.7271	12.5652	17.2228	9.65175	cndp2_24522	24.2646	15.7917
cndp2	1885.99	4388.68	2376.45	2696.54	2222.31	4556.38	5316.53	4665.37	1934.03	1938.38	2332.05	3119.34	-0.349244	0.375552	0.352397	0.469817	chr19	20829125	20829249	chr19:20829125-20829249	125	*	Distal Intergenic	Distal Intergenic	19	20801486	20823101	21616	1	327288	NM_214704	27639	ENSDARG00000003931	carnosine dipeptidase 2	6.88206	15.1743	5.9304	9.13681	13.3306	11.7039	9.28769	8.50344	9.99034	7.47927	12.302	16.0862	cndp2_27639	9.99365	11.4645
cndp2	1885.99	4388.68	2376.45	2696.54	2222.31	4556.38	5316.53	4665.37	1934.03	1938.38	2332.05	3119.34	-0.349244	0.375552	0.352397	0.469817	chr19	20830721	20830955	chr19:20830721-20830955	235	*	Distal Intergenic	Distal Intergenic	19	20801486	20823101	21616	1	327288	NM_214704	29235	ENSDARG00000003931	carnosine dipeptidase 2	33.0339	9.75491	24.9077	11.1672	12.4975	16.0928	17.0274	28.9117	16.2343	7.77844	11.4819	1.60862	cndp2_29235	19.1741	9.27582
cndp2	1885.99	4388.68	2376.45	2696.54	2222.31	4556.38	5316.53	4665.37	1934.03	1938.38	2332.05	3119.34	-0.349244	0.375552	0.352397	0.469817	chr19	20832096	20832220	chr19:20832096-20832220	125	*	Distal Intergenic	Distal Intergenic	19	20801486	20823101	21616	1	327288	NM_214704	30610	ENSDARG00000003931	carnosine dipeptidase 2	19.2698	3.25164	3.55824	6.0912	10.8311	4.38895	7.73974	8.50344	8.74155	4.18839	6.56108	6.4345	cndp2_30610	7.95426	6.48138
cndp2	1885.99	4388.68	2376.45	2696.54	2222.31	4556.38	5316.53	4665.37	1934.03	1938.38	2332.05	3119.34	-0.349244	0.375552	0.352397	0.469817	chr19	20832227	20832409	chr19:20832227-20832409	183	*	Distal Intergenic	Distal Intergenic	19	20801486	20823101	21616	1	327288	NM_214704	30741	ENSDARG00000003931	carnosine dipeptidase 2	22.0226	7.58715	3.55824	6.0912	8.33164	2.92597	12.3836	6.80275	17.4831	5.0859	5.74095	3.21725	cndp2_30741	8.71289	7.8818
cndp2	1885.99	4388.68	2376.45	2696.54	2222.31	4556.38	5316.53	4665.37	1934.03	1938.38	2332.05	3119.34	-0.349244	0.375552	0.352397	0.469817	chr19	20832580	20832822	chr19:20832580-20832822	243	*	Distal Intergenic	Distal Intergenic	19	20801486	20823101	21616	1	327288	NM_214704	31094	ENSDARG00000003931	carnosine dipeptidase 2	71.5734	13.0065	33.2102	36.5472	24.1618	10.2409	10.8356	1.70069	1.24879	5.0859	2.46041	6.4345	cndp2_31094	25.1596	3.8074
cndp2	1885.99	4388.68	2376.45	2696.54	2222.31	4556.38	5316.53	4665.37	1934.03	1938.38	2332.05	3119.34	-0.349244	0.375552	0.352397	0.469817	chr19	20836858	20837357	chr19:20836858-20837357	500	*	Distal Intergenic	Distal Intergenic	19	20801486	20823101	21616	1	327288	NM_214704	35372	ENSDARG00000003931	carnosine dipeptidase 2	96.3489	35.768	126.911	31.4712	102.479	24.8707	52.6302	5.10206	16.2343	6.58176	14.7624	17.6949	cndp2_35372	59.4476	13.8183
cndp2	1885.99	4388.68	2376.45	2696.54	2222.31	4556.38	5316.53	4665.37	1934.03	1938.38	2332.05	3119.34	-0.349244	0.375552	0.352397	0.469817	chr19	20841839	20842010	chr19:20841839-20842010	172	*	Distal Intergenic	Distal Intergenic	19	20801486	20823101	21616	1	327288	NM_214704	40353	ENSDARG00000003931	carnosine dipeptidase 2	17.8934	11.9227	22.5355	31.4712	15.8301	21.9448	12.3836	1.70069	8.74155	5.0859	2.46041	4.82587	cndp2_40353	16.9602	5.27843
cndp2	1885.99	4388.68	2376.45	2696.54	2222.31	4556.38	5316.53	4665.37	1934.03	1938.38	2332.05	3119.34	-0.349244	0.375552	0.352397	0.469817	chr19	20842192	20842398	chr19:20842192-20842398	207	*	Distal Intergenic	Distal Intergenic	19	20801486	20823101	21616	1	327288	NM_214704	40706	ENSDARG00000003931	carnosine dipeptidase 2	55.0565	31.4325	93.7003	25.38	28.3276	27.7967	26.3151	11.9048	2.49759	5.98341	9.02149	3.21725	cndp2_40706	37.4892	5.17993
cndp2	1885.99	4388.68	2376.45	2696.54	2222.31	4556.38	5316.53	4665.37	1934.03	1938.38	2332.05	3119.34	-0.349244	0.375552	0.352397	0.469817	chr19	20844389	20844727	chr19:20844389-20844727	339	*	Distal Intergenic	Distal Intergenic	19	20801486	20823101	21616	1	327288	NM_214704	42903	ENSDARG00000003931	carnosine dipeptidase 2	199.58	76.9554	217.053	95.4289	49.1567	36.5746	51.0823	8.50344	3.74638	2.39337	0.820135	1.60862	cndp2_42903	91.7917	2.14213
cndp2	1885.99	4388.68	2376.45	2696.54	2222.31	4556.38	5316.53	4665.37	1934.03	1938.38	2332.05	3119.34	-0.349244	0.375552	0.352397	0.469817	chr19	20845833	20846063	chr19:20845833-20846063	231	*	Distal Intergenic	Distal Intergenic	19	20801486	20823101	21616	1	327288	NM_214704	44347	ENSDARG00000003931	carnosine dipeptidase 2	12.3877	11.9227	17.7912	13.1976	17.4964	7.31492	12.3836	15.3062	8.74155	5.0859	2.46041	1.60862	cndp2_44347	13.475	4.47412
cndp2	1885.99	4388.68	2376.45	2696.54	2222.31	4556.38	5316.53	4665.37	1934.03	1938.38	2332.05	3119.34	-0.349244	0.375552	0.352397	0.469817	chr19	20847569	20847864	chr19:20847569-20847864	296	*	Distal Intergenic	Distal Intergenic	19	20801486	20823101	21616	1	327288	NM_214704	46083	ENSDARG00000003931	carnosine dipeptidase 2	15.1405	5.41939	20.1634	8.12161	24.1618	14.6298	24.7672	22.1089	7.49276	7.77844	1.64027	14.4776	cndp2_46083	16.8141	7.84727
cndp2	1885.99	4388.68	2376.45	2696.54	2222.31	4556.38	5316.53	4665.37	1934.03	1938.38	2332.05	3119.34	-0.349244	0.375552	0.352397	0.469817	chr19	20856219	20856500	chr19:20856219-20856500	282	*	Distal Intergenic	Distal Intergenic	19	20801486	20823101	21616	1	327288	NM_214704	54733	ENSDARG00000003931	carnosine dipeptidase 2	1.37641	5.41939	11.8608	17.2584	9.1648	1.46298	7.73974	11.9048	3.74638	6.88093	10.6618	9.65175	cndp2_54733	8.27342	7.7352
cndp2	1885.99	4388.68	2376.45	2696.54	2222.31	4556.38	5316.53	4665.37	1934.03	1938.38	2332.05	3119.34	-0.349244	0.375552	0.352397	0.469817	chr19	20866860	20867293	chr19:20866860-20867293	434	*	Distal Intergenic	Distal Intergenic	19	20801486	20823101	21616	1	327288	NM_214704	65374	ENSDARG00000003931	carnosine dipeptidase 2	13.7641	11.9227	7.11648	5.076	20.8291	13.1669	17.0274	5.10206	2.49759	14.3602	5.74095	6.4345	cndp2_65374	11.7506	7.25831
cndp2	1885.99	4388.68	2376.45	2696.54	2222.31	4556.38	5316.53	4665.37	1934.03	1938.38	2332.05	3119.34	-0.349244	0.375552	0.352397	0.469817	chr19	20882442	20882705	chr19:20882442-20882705	264	*	Distal Intergenic	Distal Intergenic	19	20801486	20823101	21616	1	327288	NM_214704	80956	ENSDARG00000003931	carnosine dipeptidase 2	20.6462	3.25164	9.48864	5.076	11.6643	5.85194	7.73974	6.80275	17.4831	4.18839	8.20135	9.65175	cndp2_80956	8.81515	9.88115
cndp2	1885.99	4388.68	2376.45	2696.54	2222.31	4556.38	5316.53	4665.37	1934.03	1938.38	2332.05	3119.34	-0.349244	0.375552	0.352397	0.469817	chr19	20886185	20886559	chr19:20886185-20886559	375	*	Distal Intergenic	Distal Intergenic	19	20801486	20823101	21616	1	327288	NM_214704	84699	ENSDARG00000003931	carnosine dipeptidase 2	4.12924	16.2582	16.6051	17.2584	20.8291	10.2409	23.2192	20.4083	16.2343	6.28258	13.9423	17.6949	cndp2_84699	16.1186	13.5385
cndp2	1885.99	4388.68	2376.45	2696.54	2222.31	4556.38	5316.53	4665.37	1934.03	1938.38	2332.05	3119.34	-0.349244	0.375552	0.352397	0.469817	chr19	20889279	20889997	chr19:20889279-20889997	719	*	Distal Intergenic	Distal Intergenic	19	20801486	20823101	21616	1	327288	NM_214704	87793	ENSDARG00000003931	carnosine dipeptidase 2	72.9499	17.3421	36.7685	16.2432	51.6562	36.5746	38.6987	35.7144	16.2343	18.2494	18.043	17.6949	cndp2_87793	38.2434	17.5554
cndp2	1885.99	4388.68	2376.45	2696.54	2222.31	4556.38	5316.53	4665.37	1934.03	1938.38	2332.05	3119.34	-0.349244	0.375552	0.352397	0.469817	chr19	20907484	20907631	chr19:20907484-20907631	148	*	Distal Intergenic	Distal Intergenic	19	20801486	20823101	21616	1	327288	NM_214704	105998	ENSDARG00000003931	carnosine dipeptidase 2	1.37641	4.33551	13.0469	5.076	5.83215	4.38895	1.54795	1.70069	1.24879	5.68424	0.820135	1.60862	cndp2_105998	4.66307	2.34045
cndp2	1885.99	4388.68	2376.45	2696.54	2222.31	4556.38	5316.53	4665.37	1934.03	1938.38	2332.05	3119.34	-0.349244	0.375552	0.352397	0.469817	chr19	20912165	20912704	chr19:20912165-20912704	540	*	Distal Intergenic	Distal Intergenic	19	20801486	20823101	21616	1	327288	NM_214704	110679	ENSDARG00000003931	carnosine dipeptidase 2	45.4216	22.7614	36.7685	15.228	17.4964	13.1669	10.8356	11.9048	8.74155	23.0361	12.302	20.9121	cndp2_110679	21.6979	16.248
cndp2	1885.99	4388.68	2376.45	2696.54	2222.31	4556.38	5316.53	4665.37	1934.03	1938.38	2332.05	3119.34	-0.349244	0.375552	0.352397	0.469817	chr19	20920831	20920998	chr19:20920831-20920998	168	*	Distal Intergenic	Distal Intergenic	19	20801486	20823101	21616	1	327288	NM_214704	119345	ENSDARG00000003931	carnosine dipeptidase 2	1.37641	5.41939	5.9304	1.0152	11.6643	8.77791	10.8356	1.70069	8.74155	5.98341	9.84162	8.04312	cndp2_119345	5.83999	8.15243
cndp2	1885.99	4388.68	2376.45	2696.54	2222.31	4556.38	5316.53	4665.37	1934.03	1938.38	2332.05	3119.34	-0.349244	0.375552	0.352397	0.469817	chr19	20923241	20923612	chr19:20923241-20923612	372	*	Distal Intergenic	Distal Intergenic	19	20801486	20823101	21616	1	327288	NM_214704	121755	ENSDARG00000003931	carnosine dipeptidase 2	19.2698	9.75491	17.7912	17.2584	26.6613	13.1669	1.54795	15.3062	26.2247	16.7536	9.84162	11.2604	cndp2_121755	15.0946	16.0201
cndp2	1885.99	4388.68	2376.45	2696.54	2222.31	4556.38	5316.53	4665.37	1934.03	1938.38	2332.05	3119.34	-0.349244	0.375552	0.352397	0.469817	chr19	20933818	20934075	chr19:20933818-20934075	258	*	Distal Intergenic	Distal Intergenic	19	20801486	20823101	21616	1	327288	NM_214704	132332	ENSDARG00000003931	carnosine dipeptidase 2	17.8934	7.58715	13.0469	2.0304	19.1628	10.2409	7.73974	8.50344	8.74155	10.1718	6.56108	17.6949	cndp2_132332	10.7756	10.7923
cndp2	1885.99	4388.68	2376.45	2696.54	2222.31	4556.38	5316.53	4665.37	1934.03	1938.38	2332.05	3119.34	-0.349244	0.375552	0.352397	0.469817	chr19	20942669	20942974	chr19:20942669-20942974	306	*	Distal Intergenic	Distal Intergenic	19	20801486	20823101	21616	1	327288	NM_214704	141183	ENSDARG00000003931	carnosine dipeptidase 2	6.88206	5.41939	1.18608	17.2584	13.3306	13.1669	6.19179	8.50344	9.99034	8.37678	3.28054	1.60862	cndp2_141183	8.99233	5.81407
cndp2	1885.99	4388.68	2376.45	2696.54	2222.31	4556.38	5316.53	4665.37	1934.03	1938.38	2332.05	3119.34	-0.349244	0.375552	0.352397	0.469817	chr19	20951274	20951514	chr19:20951274-20951514	241	*	Distal Intergenic	Distal Intergenic	19	20801486	20823101	21616	1	327288	NM_214704	149788	ENSDARG00000003931	carnosine dipeptidase 2	11.0113	3.25164	7.11648	8.12161	23.3286	10.2409	13.9315	5.10206	1.24879	6.58176	6.56108	4.82587	cndp2_149788	10.263	4.80438
cndp2	1885.99	4388.68	2376.45	2696.54	2222.31	4556.38	5316.53	4665.37	1934.03	1938.38	2332.05	3119.34	-0.349244	0.375552	0.352397	0.469817	chr19	20951895	20952052	chr19:20951895-20952052	158	*	Distal Intergenic	Distal Intergenic	19	20801486	20823101	21616	1	327288	NM_214704	150409	ENSDARG00000003931	carnosine dipeptidase 2	6.88206	4.33551	1.18608	3.0456	10.8311	1.46298	1.54795	1.70069	12.4879	4.78673	3.28054	1.60862	cndp2_150409	3.874	5.54096
cndp2	1885.99	4388.68	2376.45	2696.54	2222.31	4556.38	5316.53	4665.37	1934.03	1938.38	2332.05	3119.34	-0.349244	0.375552	0.352397	0.469817	chr19	20960148	20960540	chr19:20960148-20960540	393	*	Distal Intergenic	Distal Intergenic	19	20801486	20823101	21616	1	327288	NM_214704	158662	ENSDARG00000003931	carnosine dipeptidase 2	9.63489	7.58715	8.30256	25.38	21.6623	21.9448	10.8356	8.50344	8.74155	9.27429	13.1222	11.2604	cndp2_158662	14.2313	10.5996
cndp2	1885.99	4388.68	2376.45	2696.54	2222.31	4556.38	5316.53	4665.37	1934.03	1938.38	2332.05	3119.34	-0.349244	0.375552	0.352397	0.469817	chr19	20961282	20961506	chr19:20961282-20961506	225	*	Distal Intergenic	Distal Intergenic	19	20801486	20823101	21616	1	327288	NM_214704	159796	ENSDARG00000003931	carnosine dipeptidase 2	1.37641	7.58715	3.55824	5.076	4.16582	1.46298	9.28769	8.50344	8.74155	9.87263	15.5826	19.3035	cndp2_159796	5.12722	13.3751
cndp2	1885.99	4388.68	2376.45	2696.54	2222.31	4556.38	5316.53	4665.37	1934.03	1938.38	2332.05	3119.34	-0.349244	0.375552	0.352397	0.469817	chr19	20963303	20963530	chr19:20963303-20963530	228	*	Distal Intergenic	Distal Intergenic	19	20801486	20823101	21616	1	327288	NM_214704	161817	ENSDARG00000003931	carnosine dipeptidase 2	9.63489	4.33551	14.233	12.1824	5.83215	8.77791	1.54795	1.70069	2.49759	5.38507	3.28054	1.60862	cndp2_161817	7.28056	3.19296
cndp2	1885.99	4388.68	2376.45	2696.54	2222.31	4556.38	5316.53	4665.37	1934.03	1938.38	2332.05	3119.34	-0.349244	0.375552	0.352397	0.469817	chr19	20964021	20964197	chr19:20964021-20964197	177	*	Distal Intergenic	Distal Intergenic	19	20801486	20823101	21616	1	327288	NM_214704	162535	ENSDARG00000003931	carnosine dipeptidase 2	1.37641	2.16776	7.11648	2.0304	13.3306	10.2409	9.28769	3.40138	11.2391	6.28258	5.74095	1.60862	cndp2_162535	6.11895	6.21782
cndp2	1885.99	4388.68	2376.45	2696.54	2222.31	4556.38	5316.53	4665.37	1934.03	1938.38	2332.05	3119.34	-0.349244	0.375552	0.352397	0.469817	chr19	20969590	20969960	chr19:20969590-20969960	371	*	Distal Intergenic	Distal Intergenic	19	20801486	20823101	21616	1	327288	NM_214704	168104	ENSDARG00000003931	carnosine dipeptidase 2	17.8934	22.7614	79.4673	111.672	75.8179	83.3901	1.54795	18.7076	8.74155	5.0859	8.20135	9.65175	cndp2_168104	51.4072	7.92014
cndp2	1885.99	4388.68	2376.45	2696.54	2222.31	4556.38	5316.53	4665.37	1934.03	1938.38	2332.05	3119.34	-0.349244	0.375552	0.352397	0.469817	chr19	20971062	20971323	chr19:20971062-20971323	262	*	Distal Intergenic	Distal Intergenic	19	20801486	20823101	21616	1	327288	NM_214704	169576	ENSDARG00000003931	carnosine dipeptidase 2	6.88206	9.75491	13.0469	8.12161	4.16582	4.38895	3.0959	1.70069	7.49276	6.88093	9.84162	17.6949	cndp2_169576	6.3946	10.4775
cndp2	1885.99	4388.68	2376.45	2696.54	2222.31	4556.38	5316.53	4665.37	1934.03	1938.38	2332.05	3119.34	-0.349244	0.375552	0.352397	0.469817	chr19	20973415	20973553	chr19:20973415-20973553	139	*	Distal Intergenic	Distal Intergenic	19	20801486	20823101	21616	1	327288	NM_214704	171929	ENSDARG00000003931	carnosine dipeptidase 2	12.3877	3.25164	1.18608	15.228	14.1638	16.0928	3.0959	1.70069	6.24397	3.29088	9.02149	3.21725	cndp2_171929	8.38833	5.44339
cndp2	1885.99	4388.68	2376.45	2696.54	2222.31	4556.38	5316.53	4665.37	1934.03	1938.38	2332.05	3119.34	-0.349244	0.375552	0.352397	0.469817	chr19	20973612	20973776	chr19:20973612-20973776	165	*	Distal Intergenic	Distal Intergenic	19	20801486	20823101	21616	1	327288	NM_214704	172126	ENSDARG00000003931	carnosine dipeptidase 2	26.1518	1.08388	8.30256	11.1672	16.6633	2.92597	1.54795	1.70069	1.24879	2.39337	0.820135	1.60862	cndp2_172126	8.69292	1.51773
cndp2	1885.99	4388.68	2376.45	2696.54	2222.31	4556.38	5316.53	4665.37	1934.03	1938.38	2332.05	3119.34	-0.349244	0.375552	0.352397	0.469817	chr19	20999820	21000106	chr19:20999820-21000106	287	*	Distal Intergenic	Distal Intergenic	19	20801486	20823101	21616	1	327288	NM_214704	198334	ENSDARG00000003931	carnosine dipeptidase 2	13.7641	7.58715	10.6747	11.1672	14.1638	4.38895	13.9315	15.3062	2.49759	9.87263	5.74095	6.4345	cndp2_198334	11.373	6.13642
cndp2	1885.99	4388.68	2376.45	2696.54	2222.31	4556.38	5316.53	4665.37	1934.03	1938.38	2332.05	3119.34	-0.349244	0.375552	0.352397	0.469817	chr19	21001882	21002195	chr19:21001882-21002195	314	*	Distal Intergenic	Distal Intergenic	19	20801486	20823101	21616	1	327288	NM_214704	200396	ENSDARG00000003931	carnosine dipeptidase 2	6.88206	1.08388	5.9304	17.2584	6.66531	8.77791	4.64384	13.6055	8.74155	7.47927	6.56108	4.82587	cndp2_200396	8.10591	6.90194
cndp2	1885.99	4388.68	2376.45	2696.54	2222.31	4556.38	5316.53	4665.37	1934.03	1938.38	2332.05	3119.34	-0.349244	0.375552	0.352397	0.469817	chr19	21007142	21007376	chr19:21007142-21007376	235	*	Distal Intergenic	Distal Intergenic	19	20801486	20823101	21616	1	327288	NM_214704	205656	ENSDARG00000003931	carnosine dipeptidase 2	1.37641	2.16776	3.55824	4.0608	12.4975	1.46298	4.64384	10.2041	1.24879	7.47927	2.46041	4.82587	cndp2_205656	4.99645	4.00358
cndp2	1885.99	4388.68	2376.45	2696.54	2222.31	4556.38	5316.53	4665.37	1934.03	1938.38	2332.05	3119.34	-0.349244	0.375552	0.352397	0.469817	chr19	21012724	21013021	chr19:21012724-21013021	298	*	Distal Intergenic	Distal Intergenic	19	20801486	20823101	21616	1	327288	NM_214704	211238	ENSDARG00000003931	carnosine dipeptidase 2	42.6688	18.4259	29.652	70.0489	49.1567	54.1304	54.1782	11.9048	8.74155	8.67595	7.38122	1.60862	cndp2_211238	41.2707	6.60184
cndp2	1885.99	4388.68	2376.45	2696.54	2222.31	4556.38	5316.53	4665.37	1934.03	1938.38	2332.05	3119.34	-0.349244	0.375552	0.352397	0.469817	chr19	21013119	21013750	chr19:21013119-21013750	632	*	Distal Intergenic	Distal Intergenic	19	20801486	20823101	21616	1	327288	NM_214704	211633	ENSDARG00000003931	carnosine dipeptidase 2	72.9499	14.0904	58.1179	96.4441	69.1526	19.0188	21.6713	28.9117	6.24397	10.471	0.820135	4.82587	cndp2_211633	47.5446	5.59024
cndp2	1885.99	4388.68	2376.45	2696.54	2222.31	4556.38	5316.53	4665.37	1934.03	1938.38	2332.05	3119.34	-0.349244	0.375552	0.352397	0.469817	chr19	21023286	21023441	chr19:21023286-21023441	156	*	Distal Intergenic	Distal Intergenic	19	20801486	20823101	21616	1	327288	NM_214704	221800	ENSDARG00000003931	carnosine dipeptidase 2	1.37641	9.75491	2.37216	2.0304	8.33164	2.92597	1.54795	1.70069	1.24879	5.0859	10.6618	8.04312	cndp2_221800	3.75502	6.25989
cndp2	1885.99	4388.68	2376.45	2696.54	2222.31	4556.38	5316.53	4665.37	1934.03	1938.38	2332.05	3119.34	-0.349244	0.375552	0.352397	0.469817	chr19	21027275	21027617	chr19:21027275-21027617	343	*	Distal Intergenic	Distal Intergenic	19	20801486	20823101	21616	1	327288	NM_214704	225789	ENSDARG00000003931	carnosine dipeptidase 2	20.6462	6.50327	5.9304	22.3344	43.3245	8.77791	4.64384	1.70069	7.49276	5.68424	5.74095	11.2604	cndp2_225789	14.2327	7.54458
cndp2	1885.99	4388.68	2376.45	2696.54	2222.31	4556.38	5316.53	4665.37	1934.03	1938.38	2332.05	3119.34	-0.349244	0.375552	0.352397	0.469817	chr19	21040522	21040819	chr19:21040522-21040819	298	*	Distal Intergenic	Distal Intergenic	19	20801486	20823101	21616	1	327288	NM_214704	239036	ENSDARG00000003931	carnosine dipeptidase 2	11.0113	11.9227	11.8608	11.1672	9.1648	7.31492	13.9315	1.70069	39.9614	11.0693	20.5034	20.9121	cndp2_239036	9.75924	23.1115
cndp2	1885.99	4388.68	2376.45	2696.54	2222.31	4556.38	5316.53	4665.37	1934.03	1938.38	2332.05	3119.34	-0.349244	0.375552	0.352397	0.469817	chr19	21040866	21041009	chr19:21040866-21041009	144	*	Distal Intergenic	Distal Intergenic	19	20801486	20823101	21616	1	327288	NM_214704	239380	ENSDARG00000003931	carnosine dipeptidase 2	19.2698	11.9227	9.48864	7.10641	1.66633	5.85194	3.0959	1.70069	47.4541	8.67595	18.8631	19.3035	cndp2_239380	7.51279	23.5742
cndp2	1885.99	4388.68	2376.45	2696.54	2222.31	4556.38	5316.53	4665.37	1934.03	1938.38	2332.05	3119.34	-0.349244	0.375552	0.352397	0.469817	chr19	21042646	21042797	chr19:21042646-21042797	152	*	Distal Intergenic	Distal Intergenic	19	20801486	20823101	21616	1	327288	NM_214704	241160	ENSDARG00000003931	carnosine dipeptidase 2	12.3877	14.0904	1.18608	7.10641	8.33164	1.46298	17.0274	15.3062	18.7319	13.1635	17.2228	17.6949	cndp2_241160	9.61236	16.7033
cndp2	1885.99	4388.68	2376.45	2696.54	2222.31	4556.38	5316.53	4665.37	1934.03	1938.38	2332.05	3119.34	-0.349244	0.375552	0.352397	0.469817	chr19	21052152	21052378	chr19:21052152-21052378	227	*	Distal Intergenic	Distal Intergenic	19	20801486	20823101	21616	1	327288	NM_214704	250666	ENSDARG00000003931	carnosine dipeptidase 2	8.25847	7.58715	10.6747	5.076	10.8311	1.46298	1.54795	1.70069	4.99517	6.58176	10.6618	11.2604	cndp2_250666	5.89239	8.37476
cndp2	1885.99	4388.68	2376.45	2696.54	2222.31	4556.38	5316.53	4665.37	1934.03	1938.38	2332.05	3119.34	-0.349244	0.375552	0.352397	0.469817	chr19	21061550	21061778	chr19:21061550-21061778	229	*	Distal Intergenic	Distal Intergenic	19	20801486	20823101	21616	1	327288	NM_214704	260064	ENSDARG00000003931	carnosine dipeptidase 2	1.37641	9.75491	5.9304	1.0152	9.1648	19.0188	10.8356	8.50344	11.2391	17.0527	2.46041	17.6949	cndp2_260064	8.19995	12.1118
cndp2	1885.99	4388.68	2376.45	2696.54	2222.31	4556.38	5316.53	4665.37	1934.03	1938.38	2332.05	3119.34	-0.349244	0.375552	0.352397	0.469817	chr19	21063069	21063624	chr19:21063069-21063624	556	*	Distal Intergenic	Distal Intergenic	19	20801486	20823101	21616	1	327288	NM_214704	261583	ENSDARG00000003931	carnosine dipeptidase 2	211.968	94.2974	404.453	165.478	278.277	172.632	82.0412	91.8371	19.9807	25.7287	23.7839	14.4776	cndp2_261583	187.623	20.9927
cndp2	1885.99	4388.68	2376.45	2696.54	2222.31	4556.38	5316.53	4665.37	1934.03	1938.38	2332.05	3119.34	-0.349244	0.375552	0.352397	0.469817	chr19	21072268	21072611	chr19:21072268-21072611	344	*	Distal Intergenic	Distal Intergenic	19	20801486	20823101	21616	1	327288	NM_214704	270782	ENSDARG00000003931	carnosine dipeptidase 2	20.6462	5.41939	14.233	11.1672	24.9949	8.77791	13.9315	1.70069	4.99517	5.0859	8.20135	3.21725	cndp2_270782	12.6088	5.37492
cndp2	1885.99	4388.68	2376.45	2696.54	2222.31	4556.38	5316.53	4665.37	1934.03	1938.38	2332.05	3119.34	-0.349244	0.375552	0.352397	0.469817	chr19	21076373	21076656	chr19:21076373-21076656	284	*	Distal Intergenic	Distal Intergenic	19	20801486	20823101	21616	1	327288	NM_214704	274887	ENSDARG00000003931	carnosine dipeptidase 2	11.0113	1.08388	5.9304	9.13681	12.4975	1.46298	6.19179	1.70069	17.4831	9.87263	9.02149	6.4345	cndp2_274887	6.12691	10.7029
cndp2	1885.99	4388.68	2376.45	2696.54	2222.31	4556.38	5316.53	4665.37	1934.03	1938.38	2332.05	3119.34	-0.349244	0.375552	0.352397	0.469817	chr19	21084885	21085241	chr19:21084885-21085241	357	*	Distal Intergenic	Distal Intergenic	19	20801486	20823101	21616	1	327288	NM_214704	283399	ENSDARG00000003931	carnosine dipeptidase 2	1.37641	5.41939	3.55824	7.10641	9.1648	1.46298	9.28769	6.80275	16.2343	8.37678	4.92081	1.60862	cndp2_283399	5.52233	7.78513
cndp2	1885.99	4388.68	2376.45	2696.54	2222.31	4556.38	5316.53	4665.37	1934.03	1938.38	2332.05	3119.34	-0.349244	0.375552	0.352397	0.469817	chr19	21087468	21087693	chr19:21087468-21087693	226	*	Distal Intergenic	Distal Intergenic	19	20801486	20823101	21616	1	327288	NM_214704	285982	ENSDARG00000003931	carnosine dipeptidase 2	8.25847	14.0904	18.9773	10.152	13.3306	5.85194	10.8356	5.10206	14.9855	7.47927	4.92081	12.869	cndp2_285982	10.8248	10.0636
cndp2	1885.99	4388.68	2376.45	2696.54	2222.31	4556.38	5316.53	4665.37	1934.03	1938.38	2332.05	3119.34	-0.349244	0.375552	0.352397	0.469817	chr19	21094911	21095029	chr19:21094911-21095029	119	*	Distal Intergenic	Distal Intergenic	19	20801486	20823101	21616	1	327288	NM_214704	293425	ENSDARG00000003931	carnosine dipeptidase 2	1.37641	1.08388	1.18608	1.0152	4.16582	8.77791	1.54795	1.70069	3.74638	5.0859	9.02149	9.65175	cndp2_293425	2.60674	6.87638
cndp2	1885.99	4388.68	2376.45	2696.54	2222.31	4556.38	5316.53	4665.37	1934.03	1938.38	2332.05	3119.34	-0.349244	0.375552	0.352397	0.469817	chr19	21101277	21101441	chr19:21101277-21101441	165	*	Distal Intergenic	Distal Intergenic	19	20801486	20823101	21616	1	327288	NM_214704	299791	ENSDARG00000003931	carnosine dipeptidase 2	8.25847	14.0904	4.74432	6.0912	4.16582	4.38895	1.54795	1.70069	11.2391	4.18839	0.820135	1.60862	cndp2_299791	5.62348	4.46407
cndp2	1885.99	4388.68	2376.45	2696.54	2222.31	4556.38	5316.53	4665.37	1934.03	1938.38	2332.05	3119.34	-0.349244	0.375552	0.352397	0.469817	chr19	21104127	21104772	chr19:21104127-21104772	646	*	Distal Intergenic	Distal Intergenic	19	20801486	20823101	21616	1	327288	NM_214704	302641	ENSDARG00000003931	carnosine dipeptidase 2	9.63489	19.5098	3.55824	15.228	22.4954	10.2409	17.0274	18.7076	11.2391	22.4378	15.5826	24.1294	cndp2_302641	14.5503	18.3472
cnn3a	97.9359	485.946	135.228	245.202	169.582	2005.13	1139.18	3080.74	1811.58	2917.88	1824.29	1264.79	-3.23167	0.434525	1.02796e-13	1.50947e-12	chr24	31145602	31145748	chr24:31145602-31145748	147	*	Distal Intergenic	Distal Intergenic	24	31170362	31194816	24455	2	326931	NM_199753	49068	ENSDARG00000099510	calponin 3, acidic a	2.75282	1.08388	1.18608	3.0456	16.6633	7.31492	13.9315	15.3062	1.24879	1.79502	2.46041	1.60862	cnn3a_49068	7.66054	1.77821
cnn3a	97.9359	485.946	135.228	245.202	169.582	2005.13	1139.18	3080.74	1811.58	2917.88	1824.29	1264.79	-3.23167	0.434525	1.02796e-13	1.50947e-12	chr24	31150028	31150204	chr24:31150028-31150204	177	*	Distal Intergenic	Distal Intergenic	24	31170362	31194816	24455	2	326931	NM_199753	44612	ENSDARG00000099510	calponin 3, acidic a	34.4103	5.41939	17.7912	7.10641	10.8311	13.1669	41.7946	1.70069	3.74638	3.88922	10.6618	1.60862	cnn3a_44612	16.5276	4.97649
cnn3a	97.9359	485.946	135.228	245.202	169.582	2005.13	1139.18	3080.74	1811.58	2917.88	1824.29	1264.79	-3.23167	0.434525	1.02796e-13	1.50947e-12	chr24	31150609	31150791	chr24:31150609-31150791	183	*	Distal Intergenic	Distal Intergenic	24	31170362	31194816	24455	2	326931	NM_199753	44025	ENSDARG00000099510	calponin 3, acidic a	44.0452	11.9227	14.233	9.13681	27.4944	19.0188	32.5069	25.5103	1.24879	3.29088	5.74095	1.60862	cnn3a_44025	22.9835	2.97231
cnn3a	97.9359	485.946	135.228	245.202	169.582	2005.13	1139.18	3080.74	1811.58	2917.88	1824.29	1264.79	-3.23167	0.434525	1.02796e-13	1.50947e-12	chr24	31159793	31160040	chr24:31159793-31160040	248	*	Distal Intergenic	Distal Intergenic	24	31170362	31194816	24455	2	326931	NM_199753	34776	ENSDARG00000099510	calponin 3, acidic a	6.88206	11.9227	18.9773	16.2432	18.3296	27.7967	10.8356	17.0069	1.24879	7.47927	6.56108	8.04312	cnn3a_34776	15.9993	5.83307
cnn3a	97.9359	485.946	135.228	245.202	169.582	2005.13	1139.18	3080.74	1811.58	2917.88	1824.29	1264.79	-3.23167	0.434525	1.02796e-13	1.50947e-12	chr24	31161662	31162010	chr24:31161662-31162010	349	*	Distal Intergenic	Distal Intergenic	24	31170362	31194816	24455	2	326931	NM_199753	32806	ENSDARG00000099510	calponin 3, acidic a	57.8093	22.7614	153.004	53.8056	70.8189	133.132	91.3289	90.1364	13.7367	9.27429	10.6618	9.65175	cnn3a_32806	84.0996	10.8311
cnn3a	97.9359	485.946	135.228	245.202	169.582	2005.13	1139.18	3080.74	1811.58	2917.88	1824.29	1264.79	-3.23167	0.434525	1.02796e-13	1.50947e-12	chr24	31165125	31165641	chr24:31165125-31165641	517	*	Distal Intergenic	Distal Intergenic	24	31170362	31194816	24455	2	326931	NM_199753	29175	ENSDARG00000099510	calponin 3, acidic a	143.147	88.878	354.638	140.098	287.442	253.096	173.37	96.9392	11.2391	16.1552	11.4819	11.2604	cnn3a_29175	192.201	12.5342
cnn3a	97.9359	485.946	135.228	245.202	169.582	2005.13	1139.18	3080.74	1811.58	2917.88	1824.29	1264.79	-3.23167	0.434525	1.02796e-13	1.50947e-12	chr24	31171118	31171553	chr24:31171118-31171553	436	*	3' UTR	3' UTR	24	31170362	31194816	24455	2	326931	NM_199753	23263	ENSDARG00000099510	calponin 3, acidic a	6.88206	16.2582	1.18608	7.10641	23.3286	10.2409	13.9315	17.0069	9.99034	17.9502	26.2443	4.82587	cnn3a_23263	11.9926	14.7527
col11a1b	2.16035	40.1796	142.093	15.6657	33.5219	111.617	9.89633	37.624	204.088	1.47293	8.56473	55.1712	-0.413028	1.05322	0.694943	0.77791	chr2	15390850	15390979	chr2:15390850-15390979	130	*	3' UTR	3' UTR	2	15389941	15562886	172946	2	555202	NM_001184954	171907	ENSDARG00000009014	collagen, type XI, alpha 1b	15.1405	20.5937	8.30256	5.076	12.4975	19.0188	23.2192	28.9117	33.7174	20.6428	18.8631	11.2604	col11a1b_171907	16.595	21.1209
col11a1b	2.16035	40.1796	142.093	15.6657	33.5219	111.617	9.89633	37.624	204.088	1.47293	8.56473	55.1712	-0.413028	1.05322	0.694943	0.77791	chr2	15391462	15391813	chr2:15391462-15391813	352	*	3' UTR	3' UTR	2	15389941	15562886	172946	2	555202	NM_001184954	171073	ENSDARG00000009014	collagen, type XI, alpha 1b	1.37641	4.33551	5.9304	1.0152	0.833164	7.31492	15.4795	27.211	6.24397	8.97512	9.84162	9.65175	col11a1b_171073	7.93701	8.67811
col11a1b	2.16035	40.1796	142.093	15.6657	33.5219	111.617	9.89633	37.624	204.088	1.47293	8.56473	55.1712	-0.413028	1.05322	0.694943	0.77791	chr2	15395199	15395349	chr2:15395199-15395349	151	*	Exon (NM_001184954/555202, exon 66 of 67)	Exon	2	15389941	15562886	172946	2	555202	NM_001184954	167537	ENSDARG00000009014	collagen, type XI, alpha 1b	1.37641	3.25164	1.18608	1.0152	10.8311	1.46298	9.28769	6.80275	6.24397	5.38507	4.10068	3.21725	col11a1b_167537	4.40174	4.73674
col11a1b	2.16035	40.1796	142.093	15.6657	33.5219	111.617	9.89633	37.624	204.088	1.47293	8.56473	55.1712	-0.413028	1.05322	0.694943	0.77791	chr2	15399743	15399851	chr2:15399743-15399851	109	*	Exon (NM_001184954/555202, exon 60 of 67)	Exon	2	15389941	15562886	172946	2	555202	NM_001184954	163035	ENSDARG00000009014	collagen, type XI, alpha 1b	1.37641	3.25164	1.18608	1.0152	3.33266	4.38895	4.64384	1.70069	2.49759	5.68424	9.84162	1.60862	col11a1b_163035	2.61193	4.90802
col11a1b	2.16035	40.1796	142.093	15.6657	33.5219	111.617	9.89633	37.624	204.088	1.47293	8.56473	55.1712	-0.413028	1.05322	0.694943	0.77791	chr2	15402368	15402486	chr2:15402368-15402486	119	*	Intron (NM_001184954/555202, intron 58 of 66)	Intron	2	15389941	15562886	172946	2	555202	NM_001184954	160400	ENSDARG00000009014	collagen, type XI, alpha 1b	4.12924	1.08388	1.18608	1.0152	7.49848	13.1669	6.19179	5.10206	1.24879	5.0859	5.74095	9.65175	col11a1b_160400	4.9217	5.43185
col11a1b	2.16035	40.1796	142.093	15.6657	33.5219	111.617	9.89633	37.624	204.088	1.47293	8.56473	55.1712	-0.413028	1.05322	0.694943	0.77791	chr2	15415057	15415196	chr2:15415057-15415196	140	*	Exon (NM_001184954/555202, exon 51 of 67)	Exon	2	15389941	15562886	172946	2	555202	NM_001184954	147690	ENSDARG00000009014	collagen, type XI, alpha 1b	9.63489	11.9227	1.18608	2.0304	2.49949	1.46298	4.64384	5.10206	16.2343	6.28258	17.2228	14.4776	col11a1b_147690	4.8103	13.5543
col11a1b	2.16035	40.1796	142.093	15.6657	33.5219	111.617	9.89633	37.624	204.088	1.47293	8.56473	55.1712	-0.413028	1.05322	0.694943	0.77791	chr2	15416866	15417158	chr2:15416866-15417158	293	*	Exon (NM_001184954/555202, exon 50 of 67)	Exon	2	15389941	15562886	172946	2	555202	NM_001184954	145728	ENSDARG00000009014	collagen, type XI, alpha 1b	1.37641	1.08388	3.55824	1.0152	4.16582	4.38895	1.54795	1.70069	2.49759	11.9668	18.8631	12.869	col11a1b_145728	2.35464	11.5491
col11a1b	2.16035	40.1796	142.093	15.6657	33.5219	111.617	9.89633	37.624	204.088	1.47293	8.56473	55.1712	-0.413028	1.05322	0.694943	0.77791	chr2	15440181	15440456	chr2:15440181-15440456	276	*	Intron (NM_001184954/555202, intron 41 of 66)	Intron	2	15389941	15562886	172946	2	555202	NM_001184954	122430	ENSDARG00000009014	collagen, type XI, alpha 1b	1.37641	1.08388	17.7912	17.2584	2.49949	10.2409	7.73974	3.40138	14.9855	7.77844	9.02149	9.65175	col11a1b_122430	7.67392	10.3593
col11a1b	2.16035	40.1796	142.093	15.6657	33.5219	111.617	9.89633	37.624	204.088	1.47293	8.56473	55.1712	-0.413028	1.05322	0.694943	0.77791	chr2	15443915	15444462	chr2:15443915-15444462	548	*	Exon (NM_001184954/555202, exon 41 of 67)	Exon	2	15389941	15562886	172946	2	555202	NM_001184954	118424	ENSDARG00000009014	collagen, type XI, alpha 1b	1.37641	3.25164	13.0469	36.5472	6.66531	11.7039	12.3836	15.3062	31.2198	13.4627	20.5034	20.9121	col11a1b_118424	12.5351	21.5245
col11a1b	2.16035	40.1796	142.093	15.6657	33.5219	111.617	9.89633	37.624	204.088	1.47293	8.56473	55.1712	-0.413028	1.05322	0.694943	0.77791	chr2	15447312	15447461	chr2:15447312-15447461	150	*	Exon (NM_001184954/555202, exon 39 of 67)	Exon	2	15389941	15562886	172946	2	555202	NM_001184954	115425	ENSDARG00000009014	collagen, type XI, alpha 1b	2.75282	1.08388	1.18608	7.10641	4.16582	1.46298	7.73974	5.10206	11.2391	5.0859	3.28054	1.60862	col11a1b_115425	3.82497	5.30355
col11a1b	2.16035	40.1796	142.093	15.6657	33.5219	111.617	9.89633	37.624	204.088	1.47293	8.56473	55.1712	-0.413028	1.05322	0.694943	0.77791	chr2	15455518	15455733	chr2:15455518-15455733	216	*	Intron (NM_001184954/555202, intron 31 of 66)	Intron	2	15389941	15562886	172946	2	555202	NM_001184954	107153	ENSDARG00000009014	collagen, type XI, alpha 1b	1.37641	1.08388	2.37216	10.152	0.833164	1.46298	4.64384	8.50344	6.24397	10.1718	9.02149	1.60862	col11a1b_107153	3.80349	6.76147
col11a1b	2.16035	40.1796	142.093	15.6657	33.5219	111.617	9.89633	37.624	204.088	1.47293	8.56473	55.1712	-0.413028	1.05322	0.694943	0.77791	chr2	15458722	15458853	chr2:15458722-15458853	132	*	Intron (NM_001184954/555202, intron 31 of 66)	Intron	2	15389941	15562886	172946	2	555202	NM_001184954	104033	ENSDARG00000009014	collagen, type XI, alpha 1b	37.1631	53.11	42.6989	39.5928	39.9919	57.0564	65.0138	96.9392	58.6933	52.3549	37.7262	94.9089	col11a1b_104033	53.9458	60.9208
col11a1b	2.16035	40.1796	142.093	15.6657	33.5219	111.617	9.89633	37.624	204.088	1.47293	8.56473	55.1712	-0.413028	1.05322	0.694943	0.77791	chr2	15466969	15467328	chr2:15466969-15467328	360	*	Exon (NM_001184954/555202, exon 26 of 67)	Exon	2	15389941	15562886	172946	2	555202	NM_001184954	95558	ENSDARG00000009014	collagen, type XI, alpha 1b	12.3877	11.9227	119.794	145.174	69.9858	76.0752	10.8356	32.3131	6.24397	5.98341	12.302	1.60862	col11a1b_95558	59.811	6.53451
col11a1b	2.16035	40.1796	142.093	15.6657	33.5219	111.617	9.89633	37.624	204.088	1.47293	8.56473	55.1712	-0.413028	1.05322	0.694943	0.77791	chr2	15468570	15469153	chr2:15468570-15469153	584	*	Exon (NM_001184954/555202, exon 25 of 67)	Exon	2	15389941	15562886	172946	2	555202	NM_001184954	93733	ENSDARG00000009014	collagen, type XI, alpha 1b	15.1405	16.2582	67.6065	346.183	54.1557	212.133	60.37	52.7213	1.24879	11.3685	11.4819	1.60862	col11a1b_93733	103.071	6.42695
col11a1b	2.16035	40.1796	142.093	15.6657	33.5219	111.617	9.89633	37.624	204.088	1.47293	8.56473	55.1712	-0.413028	1.05322	0.694943	0.77791	chr2	15475737	15476033	chr2:15475737-15476033	297	*	Exon (NM_001184954/555202, exon 22 of 67)	Exon	2	15389941	15562886	172946	2	555202	NM_001184954	86853	ENSDARG00000009014	collagen, type XI, alpha 1b	1.37641	6.50327	3.55824	6.0912	10.8311	16.0928	7.73974	8.50344	11.2391	9.57346	8.20135	8.04312	col11a1b_86853	7.58703	9.26427
col11a1b	2.16035	40.1796	142.093	15.6657	33.5219	111.617	9.89633	37.624	204.088	1.47293	8.56473	55.1712	-0.413028	1.05322	0.694943	0.77791	chr2	15480108	15480207	chr2:15480108-15480207	100	*	Intron (NM_001184954/555202, intron 19 of 66)	Intron	2	15389941	15562886	172946	2	555202	NM_001184954	82679	ENSDARG00000009014	collagen, type XI, alpha 1b	9.63489	1.08388	1.18608	1.0152	0.833164	1.46298	1.54795	1.70069	6.24397	1.19668	6.56108	11.2604	col11a1b_82679	2.3081	6.31553
col11a1b	2.16035	40.1796	142.093	15.6657	33.5219	111.617	9.89633	37.624	204.088	1.47293	8.56473	55.1712	-0.413028	1.05322	0.694943	0.77791	chr2	15481205	15481545	chr2:15481205-15481545	341	*	Intron (NM_001184954/555202, intron 18 of 66)	Intron	2	15389941	15562886	172946	2	555202	NM_001184954	81341	ENSDARG00000009014	collagen, type XI, alpha 1b	31.6575	16.2582	27.2798	65.9881	35.8261	19.0188	23.2192	71.4289	13.7367	11.0693	4.92081	24.1294	col11a1b_81341	36.3346	13.4641
col11a1b	2.16035	40.1796	142.093	15.6657	33.5219	111.617	9.89633	37.624	204.088	1.47293	8.56473	55.1712	-0.413028	1.05322	0.694943	0.77791	chr2	15497975	15498161	chr2:15497975-15498161	187	*	Intron (NM_001184954/555202, intron 11 of 66)	Intron	2	15389941	15562886	172946	2	555202	NM_001184954	64725	ENSDARG00000009014	collagen, type XI, alpha 1b	1.37641	1.08388	1.18608	5.076	10.8311	7.31492	9.28769	5.10206	4.99517	8.37678	10.6618	12.869	col11a1b_64725	5.15727	9.22568
col11a1b	2.16035	40.1796	142.093	15.6657	33.5219	111.617	9.89633	37.624	204.088	1.47293	8.56473	55.1712	-0.413028	1.05322	0.694943	0.77791	chr2	15500601	15500745	chr2:15500601-15500745	145	*	Intron (NM_001184954/555202, intron 11 of 66)	Intron	2	15389941	15562886	172946	2	555202	NM_001184954	62141	ENSDARG00000009014	collagen, type XI, alpha 1b	12.3877	7.58715	1.18608	1.0152	4.99898	1.46298	3.0959	8.50344	11.2391	7.47927	6.56108	33.7811	col11a1b_62141	5.02968	14.7652
col11a1b	2.16035	40.1796	142.093	15.6657	33.5219	111.617	9.89633	37.624	204.088	1.47293	8.56473	55.1712	-0.413028	1.05322	0.694943	0.77791	chr2	15504681	15504908	chr2:15504681-15504908	228	*	Intron (NM_001184954/555202, intron 8 of 66)	Intron	2	15389941	15562886	172946	2	555202	NM_001184954	57978	ENSDARG00000009014	collagen, type XI, alpha 1b	6.88206	9.75491	27.2798	17.2584	12.4975	16.0928	1.54795	1.70069	1.24879	4.48756	4.92081	1.60862	col11a1b_57978	11.6268	3.06645
col11a1b	2.16035	40.1796	142.093	15.6657	33.5219	111.617	9.89633	37.624	204.088	1.47293	8.56473	55.1712	-0.413028	1.05322	0.694943	0.77791	chr2	15513486	15514118	chr2:15513486-15514118	633	*	Intron (NM_001184954/555202, intron 5 of 66)	Intron	2	15389941	15562886	172946	2	555202	NM_001184954	48768	ENSDARG00000009014	collagen, type XI, alpha 1b	30.2811	17.3421	36.7685	38.5776	29.1607	40.9636	18.5754	15.3062	21.2295	14.061	13.1222	14.4776	col11a1b_48768	28.3719	15.7226
col11a1b	2.16035	40.1796	142.093	15.6657	33.5219	111.617	9.89633	37.624	204.088	1.47293	8.56473	55.1712	-0.413028	1.05322	0.694943	0.77791	chr2	15522270	15522714	chr2:15522270-15522714	445	*	Intron (NM_001184954/555202, intron 4 of 66)	Intron	2	15389941	15562886	172946	2	555202	NM_001184954	40172	ENSDARG00000009014	collagen, type XI, alpha 1b	130.759	47.6907	480.362	306.591	144.137	174.095	89.781	105.443	13.7367	10.471	9.02149	17.6949	col11a1b_40172	184.857	12.731
col11a1b	2.16035	40.1796	142.093	15.6657	33.5219	111.617	9.89633	37.624	204.088	1.47293	8.56473	55.1712	-0.413028	1.05322	0.694943	0.77791	chr2	15530652	15530776	chr2:15530652-15530776	125	*	Intron (NM_001184954/555202, intron 4 of 66)	Intron	2	15389941	15562886	172946	2	555202	NM_001184954	32110	ENSDARG00000009014	collagen, type XI, alpha 1b	28.9047	20.5937	41.5128	39.5928	42.4914	45.3525	41.7946	22.1089	46.2053	40.9864	20.5034	53.0846	col11a1b_32110	35.2939	40.1949
col11a1b	2.16035	40.1796	142.093	15.6657	33.5219	111.617	9.89633	37.624	204.088	1.47293	8.56473	55.1712	-0.413028	1.05322	0.694943	0.77791	chr2	15538102	15538524	chr2:15538102-15538524	423	*	Intron (NM_001184954/555202, intron 4 of 66)	Intron	2	15389941	15562886	172946	2	555202	NM_001184954	24362	ENSDARG00000009014	collagen, type XI, alpha 1b	31.6575	18.4259	36.7685	17.2584	62.4873	27.7967	29.411	22.1089	6.24397	7.1801	9.02149	1.60862	col11a1b_24362	30.7393	6.01354
col11a1b	2.16035	40.1796	142.093	15.6657	33.5219	111.617	9.89633	37.624	204.088	1.47293	8.56473	55.1712	-0.413028	1.05322	0.694943	0.77791	chr2	15542919	15543412	chr2:15542919-15543412	494	*	Intron (NM_001184954/555202, intron 4 of 66)	Intron	2	15389941	15562886	172946	2	555202	NM_001184954	19474	ENSDARG00000009014	collagen, type XI, alpha 1b	31.6575	10.8388	64.0483	85.2769	52.4893	32.1857	17.0274	61.2248	11.2391	9.27429	7.38122	17.6949	col11a1b_19474	44.3436	11.3974
col11a1b	2.16035	40.1796	142.093	15.6657	33.5219	111.617	9.89633	37.624	204.088	1.47293	8.56473	55.1712	-0.413028	1.05322	0.694943	0.77791	chr2	15544129	15544336	chr2:15544129-15544336	208	*	Intron (NM_001184954/555202, intron 4 of 66)	Intron	2	15389941	15562886	172946	2	555202	NM_001184954	18550	ENSDARG00000009014	collagen, type XI, alpha 1b	2.75282	1.08388	15.419	18.2736	10.8311	8.77791	1.54795	5.10206	12.4879	5.0859	4.92081	3.21725	col11a1b_18550	7.97355	6.42797
col11a1b	2.16035	40.1796	142.093	15.6657	33.5219	111.617	9.89633	37.624	204.088	1.47293	8.56473	55.1712	-0.413028	1.05322	0.694943	0.77791	chr2	15556660	15556927	chr2:15556660-15556927	268	*	Intron (NM_001184954/555202, intron 1 of 66)	Intron	2	15389941	15562886	172946	2	555202	NM_001184954	5959	ENSDARG00000009014	collagen, type XI, alpha 1b	1.37641	2.16776	2.37216	7.10641	3.33266	36.5746	7.73974	18.7076	7.49276	7.1801	10.6618	3.21725	col11a1b_5959	9.92216	7.13796
col11a1b	2.16035	40.1796	142.093	15.6657	33.5219	111.617	9.89633	37.624	204.088	1.47293	8.56473	55.1712	-0.413028	1.05322	0.694943	0.77791	chr2	15560398	15560925	chr2:15560398-15560925	528	*	Promoter (1-2kb)	Promoter	2	15389941	15562886	172946	2	555202	NM_001184954	1961	ENSDARG00000009014	collagen, type XI, alpha 1b	26.1518	16.2582	61.6761	23.3496	72.4853	65.8343	35.6028	39.1158	6.24397	9.87263	9.02149	8.04312	col11a1b_1961	42.5592	8.2953
col11a1b	2.16035	40.1796	142.093	15.6657	33.5219	111.617	9.89633	37.624	204.088	1.47293	8.56473	55.1712	-0.413028	1.05322	0.694943	0.77791	chr2	15564252	15564401	chr2:15564252-15564401	150	*	Promoter (1-2kb)	Promoter	2	15389941	15562886	172946	2	555202	NM_001184954	-1366	ENSDARG00000009014	collagen, type XI, alpha 1b	6.88206	11.9227	5.9304	3.0456	0.833164	10.2409	7.73974	6.80275	3.74638	7.1801	10.6618	12.869	col11a1b_-1366	6.67466	8.61431
col11a1b	2.16035	40.1796	142.093	15.6657	33.5219	111.617	9.89633	37.624	204.088	1.47293	8.56473	55.1712	-0.413028	1.05322	0.694943	0.77791	chr2	15567497	15567643	chr2:15567497-15567643	147	*	Distal Intergenic	Distal Intergenic	2	15389941	15562886	172946	2	555202	NM_001184954	-4611	ENSDARG00000009014	collagen, type XI, alpha 1b	1.37641	4.33551	1.18608	9.13681	8.33164	2.92597	3.0959	6.80275	9.99034	4.48756	10.6618	6.4345	col11a1b_-4611	4.64888	7.89354
col15a1b	756.123	29.5661	1264.42	753.316	618.513	276.386	108.86	27.6647	884.781	360.869	90.5414	470.094	1.23144	0.813734	0.130198	0.213854	chr2	23937846	23938042	chr2:23937846-23938042	197	*	Exon (NM_001172370/558137, exon 38 of 38)	Exon	2	23937824	24013083	75260	2	558137	NM_001172370	75041	ENSDARG00000061848	collagen, type XV, alpha 1b	1.37641	7.58715	3.55824	3.0456	2.49949	1.46298	7.73974	13.6055	1.24879	8.37678	0.820135	4.82587	col15a1b_75041	5.10939	3.8179
col15a1b	756.123	29.5661	1264.42	753.316	618.513	276.386	108.86	27.6647	884.781	360.869	90.5414	470.094	1.23144	0.813734	0.130198	0.213854	chr2	23943621	23943803	chr2:23943621-23943803	183	*	Exon (NM_001172370/558137, exon 34 of 38)	Exon	2	23937824	24013083	75260	2	558137	NM_001172370	69280	ENSDARG00000061848	collagen, type XV, alpha 1b	1.37641	2.16776	9.48864	3.0456	0.833164	2.92597	1.54795	10.2041	22.4783	5.0859	8.20135	14.4776	col15a1b_69280	3.9487	12.5608
col15a1b	756.123	29.5661	1264.42	753.316	618.513	276.386	108.86	27.6647	884.781	360.869	90.5414	470.094	1.23144	0.813734	0.130198	0.213854	chr2	23969427	23969970	chr2:23969427-23969970	544	*	Exon (NM_001172370/558137, exon 5 of 38)	Exon	2	23937824	24013083	75260	2	558137	NM_001172370	43113	ENSDARG00000061848	collagen, type XV, alpha 1b	61.9386	14.0904	119.794	85.2769	76.6511	59.9824	65.0138	56.1227	18.7319	10.7701	19.6832	17.6949	col15a1b_43113	67.3587	16.72
col15a1b	756.123	29.5661	1264.42	753.316	618.513	276.386	108.86	27.6647	884.781	360.869	90.5414	470.094	1.23144	0.813734	0.130198	0.213854	chr2	23974501	23974803	chr2:23974501-23974803	303	*	Intron (NM_001172370/558137, intron 3 of 37)	Intron	2	23937824	24013083	75260	2	558137	NM_001172370	38280	ENSDARG00000061848	collagen, type XV, alpha 1b	4.12924	2.16776	14.233	29.4408	4.16582	10.2409	23.2192	13.6055	1.24879	5.68424	6.56108	8.04312	col15a1b_38280	12.6503	5.38431
col15a1b	756.123	29.5661	1264.42	753.316	618.513	276.386	108.86	27.6647	884.781	360.869	90.5414	470.094	1.23144	0.813734	0.130198	0.213854	chr2	23979272	23979398	chr2:23979272-23979398	127	*	Exon (NM_001172370/558137, exon 3 of 38)	Exon	2	23937824	24013083	75260	2	558137	NM_001172370	33685	ENSDARG00000061848	collagen, type XV, alpha 1b	1.37641	3.25164	1.18608	11.1672	9.99797	8.77791	3.0959	6.80275	4.99517	5.98341	4.10068	11.2604	col15a1b_33685	5.70698	6.58491
col15a1b	756.123	29.5661	1264.42	753.316	618.513	276.386	108.86	27.6647	884.781	360.869	90.5414	470.094	1.23144	0.813734	0.130198	0.213854	chr2	23979405	23979817	chr2:23979405-23979817	413	*	Exon (NM_001172370/558137, exon 3 of 38)	Exon	2	23937824	24013083	75260	2	558137	NM_001172370	33266	ENSDARG00000061848	collagen, type XV, alpha 1b	15.1405	10.8388	5.9304	14.2128	9.99797	16.0928	15.4795	25.5103	8.74155	14.3602	12.302	9.65175	col15a1b_33266	14.1504	11.2639
col15a1b	756.123	29.5661	1264.42	753.316	618.513	276.386	108.86	27.6647	884.781	360.869	90.5414	470.094	1.23144	0.813734	0.130198	0.213854	chr2	23984656	23984850	chr2:23984656-23984850	195	*	Intron (NM_001172370/558137, intron 2 of 37)	Intron	2	23937824	24013083	75260	2	558137	NM_001172370	28233	ENSDARG00000061848	collagen, type XV, alpha 1b	9.63489	3.25164	3.55824	12.1824	5.83215	5.85194	7.73974	8.50344	12.4879	3.88922	8.20135	4.82587	col15a1b_28233	7.0693	7.35109
col15a1b	756.123	29.5661	1264.42	753.316	618.513	276.386	108.86	27.6647	884.781	360.869	90.5414	470.094	1.23144	0.813734	0.130198	0.213854	chr2	23985272	23985393	chr2:23985272-23985393	122	*	Intron (NM_001172370/558137, intron 2 of 37)	Intron	2	23937824	24013083	75260	2	558137	NM_001172370	27690	ENSDARG00000061848	collagen, type XV, alpha 1b	1.37641	8.67103	1.18608	3.0456	7.49848	1.46298	21.6713	22.1089	24.9759	10.471	8.20135	16.0862	col15a1b_27690	8.3776	14.9336
col15a1b	756.123	29.5661	1264.42	753.316	618.513	276.386	108.86	27.6647	884.781	360.869	90.5414	470.094	1.23144	0.813734	0.130198	0.213854	chr2	23986074	23986548	chr2:23986074-23986548	475	*	Intron (NM_001172370/558137, intron 2 of 37)	Intron	2	23937824	24013083	75260	2	558137	NM_001172370	26535	ENSDARG00000061848	collagen, type XV, alpha 1b	2.75282	1.08388	13.0469	27.4104	8.33164	10.2409	21.6713	8.50344	2.49759	17.9502	7.38122	4.82587	col15a1b_26535	11.6302	8.16373
col15a1b	756.123	29.5661	1264.42	753.316	618.513	276.386	108.86	27.6647	884.781	360.869	90.5414	470.094	1.23144	0.813734	0.130198	0.213854	chr2	23989651	23989771	chr2:23989651-23989771	121	*	Intron (NM_001172370/558137, intron 2 of 37)	Intron	2	23937824	24013083	75260	2	558137	NM_001172370	23312	ENSDARG00000061848	collagen, type XV, alpha 1b	1.37641	1.08388	7.11648	6.0912	0.833164	2.92597	15.4795	11.9048	1.24879	3.88922	6.56108	4.82587	col15a1b_23312	5.85142	4.13124
col15a1b	756.123	29.5661	1264.42	753.316	618.513	276.386	108.86	27.6647	884.781	360.869	90.5414	470.094	1.23144	0.813734	0.130198	0.213854	chr2	23994154	23994351	chr2:23994154-23994351	198	*	Intron (NM_001172370/558137, intron 2 of 37)	Intron	2	23937824	24013083	75260	2	558137	NM_001172370	18732	ENSDARG00000061848	collagen, type XV, alpha 1b	17.8934	1.08388	22.5355	19.2888	5.83215	19.0188	35.6028	11.9048	8.74155	3.88922	2.46041	4.82587	col15a1b_18732	16.645	4.97926
col15a1b	756.123	29.5661	1264.42	753.316	618.513	276.386	108.86	27.6647	884.781	360.869	90.5414	470.094	1.23144	0.813734	0.130198	0.213854	chr2	24000025	24000415	chr2:24000025-24000415	391	*	Intron (NM_001172370/558137, intron 2 of 37)	Intron	2	23937824	24013083	75260	2	558137	NM_001172370	12668	ENSDARG00000061848	collagen, type XV, alpha 1b	45.4216	11.9227	141.143	140.098	90.8149	177.021	267.795	134.354	16.2343	13.1635	9.84162	19.3035	col15a1b_12668	126.071	14.6357
col15a1b	756.123	29.5661	1264.42	753.316	618.513	276.386	108.86	27.6647	884.781	360.869	90.5414	470.094	1.23144	0.813734	0.130198	0.213854	chr2	24003710	24004018	chr2:24003710-24004018	309	*	Intron (NM_001172370/558137, intron 2 of 37)	Intron	2	23937824	24013083	75260	2	558137	NM_001172370	9065	ENSDARG00000061848	collagen, type XV, alpha 1b	26.1518	7.58715	20.1634	17.2584	4.16582	7.31492	30.959	20.4083	9.99034	7.1801	10.6618	3.21725	col15a1b_9065	16.7511	7.76236
col15a1b	756.123	29.5661	1264.42	753.316	618.513	276.386	108.86	27.6647	884.781	360.869	90.5414	470.094	1.23144	0.813734	0.130198	0.213854	chr2	24011990	24012108	chr2:24011990-24012108	119	*	Promoter (<=1kb)	Promoter	2	23937824	24013083	75260	2	558137	NM_001172370	975	ENSDARG00000061848	collagen, type XV, alpha 1b	1.37641	1.08388	5.9304	1.0152	4.16582	4.38895	10.8356	8.50344	11.2391	3.88922	5.74095	4.82587	col15a1b_975	4.66247	6.42379
col15a1b	756.123	29.5661	1264.42	753.316	618.513	276.386	108.86	27.6647	884.781	360.869	90.5414	470.094	1.23144	0.813734	0.130198	0.213854	chr2	24012897	24013030	chr2:24012897-24013030	134	*	Promoter (<=1kb)	Promoter	2	23937824	24013083	75260	2	558137	NM_001172370	53	ENSDARG00000061848	collagen, type XV, alpha 1b	9.63489	2.16776	5.9304	11.1672	4.16582	2.92597	4.64384	13.6055	4.99517	3.29088	4.10068	11.2604	col15a1b_53	6.78017	5.91177
col15a1b	756.123	29.5661	1264.42	753.316	618.513	276.386	108.86	27.6647	884.781	360.869	90.5414	470.094	1.23144	0.813734	0.130198	0.213854	chr2	24013162	24013473	chr2:24013162-24013473	312	*	Promoter (<=1kb)	Promoter	2	23937824	24013083	75260	2	558137	NM_001172370	-79	ENSDARG00000061848	collagen, type XV, alpha 1b	26.1518	17.3421	51.0014	41.6232	15.8301	39.5006	52.6302	8.50344	4.99517	6.28258	12.302	9.65175	col15a1b_-79	31.5729	8.30788
col15a1b	756.123	29.5661	1264.42	753.316	618.513	276.386	108.86	27.6647	884.781	360.869	90.5414	470.094	1.23144	0.813734	0.130198	0.213854	chr2	24017243	24017572	chr2:24017243-24017572	330	*	Distal Intergenic	Distal Intergenic	2	23937824	24013083	75260	2	558137	NM_001172370	-4160	ENSDARG00000061848	collagen, type XV, alpha 1b	4.12924	1.08388	1.18608	4.0608	3.33266	11.7039	4.64384	18.7076	12.4879	17.0527	5.74095	40.2156	col15a1b_-4160	6.10599	18.8743
col15a1b	756.123	29.5661	1264.42	753.316	618.513	276.386	108.86	27.6647	884.781	360.869	90.5414	470.094	1.23144	0.813734	0.130198	0.213854	chr2	24020413	24021089	chr2:24020413-24021089	677	*	Distal Intergenic	Distal Intergenic	2	23937824	24013083	75260	2	558137	NM_001172370	-7330	ENSDARG00000061848	collagen, type XV, alpha 1b	97.7253	35.768	176.726	211.162	99.1465	121.428	165.63	69.7282	12.4879	12.266	16.4027	20.9121	col15a1b_-7330	122.164	15.5172
col15a1b	756.123	29.5661	1264.42	753.316	618.513	276.386	108.86	27.6647	884.781	360.869	90.5414	470.094	1.23144	0.813734	0.130198	0.213854	chr2	24026665	24026944	chr2:24026665-24026944	280	*	Distal Intergenic	Distal Intergenic	2	23937824	24013083	75260	2	558137	NM_001172370	-13582	ENSDARG00000061848	collagen, type XV, alpha 1b	37.1631	7.58715	112.678	92.3833	15.8301	13.1669	54.1782	3.40138	6.24397	2.69254	0.820135	1.60862	col15a1b_-13582	42.0485	2.84132
col15a1b	756.123	29.5661	1264.42	753.316	618.513	276.386	108.86	27.6647	884.781	360.869	90.5414	470.094	1.23144	0.813734	0.130198	0.213854	chr2	24027067	24027486	chr2:24027067-24027486	420	*	Distal Intergenic	Distal Intergenic	2	23937824	24013083	75260	2	558137	NM_001172370	-13984	ENSDARG00000061848	collagen, type XV, alpha 1b	50.9273	18.4259	43.8849	153.295	29.1607	100.946	153.247	15.3062	1.24879	12.266	1.64027	11.2604	col15a1b_-13984	70.6491	6.60386
col15a1b	756.123	29.5661	1264.42	753.316	618.513	276.386	108.86	27.6647	884.781	360.869	90.5414	470.094	1.23144	0.813734	0.130198	0.213854	chr2	24030536	24030654	chr2:24030536-24030654	119	*	Distal Intergenic	Distal Intergenic	2	23937824	24013083	75260	2	558137	NM_001172370	-17453	ENSDARG00000061848	collagen, type XV, alpha 1b	2.75282	11.9227	7.11648	1.0152	4.99898	2.92597	3.0959	5.10206	3.74638	7.1801	1.64027	8.04312	col15a1b_-17453	4.86626	5.15247
col15a1b	756.123	29.5661	1264.42	753.316	618.513	276.386	108.86	27.6647	884.781	360.869	90.5414	470.094	1.23144	0.813734	0.130198	0.213854	chr2	24031069	24031226	chr2:24031069-24031226	158	*	Distal Intergenic	Distal Intergenic	2	23937824	24013083	75260	2	558137	NM_001172370	-17986	ENSDARG00000061848	collagen, type XV, alpha 1b	1.37641	1.08388	5.9304	9.13681	4.99898	11.7039	7.73974	13.6055	1.24879	8.97512	0.820135	14.4776	col15a1b_-17986	6.94695	6.38042
col15a1b	756.123	29.5661	1264.42	753.316	618.513	276.386	108.86	27.6647	884.781	360.869	90.5414	470.094	1.23144	0.813734	0.130198	0.213854	chr2	24033594	24033845	chr2:24033594-24033845	252	*	Distal Intergenic	Distal Intergenic	2	23937824	24013083	75260	2	558137	NM_001172370	-20511	ENSDARG00000061848	collagen, type XV, alpha 1b	23.399	16.2582	32.0241	75.1249	39.9919	59.9824	60.37	34.0138	6.24397	9.27429	7.38122	14.4776	col15a1b_-20511	42.6455	9.34427
col15a1b	756.123	29.5661	1264.42	753.316	618.513	276.386	108.86	27.6647	884.781	360.869	90.5414	470.094	1.23144	0.813734	0.130198	0.213854	chr2	24033892	24034171	chr2:24033892-24034171	280	*	Distal Intergenic	Distal Intergenic	2	23937824	24013083	75260	2	558137	NM_001172370	-20809	ENSDARG00000061848	collagen, type XV, alpha 1b	20.6462	11.9227	47.4432	102.535	42.4914	89.2421	131.576	47.6193	6.24397	6.28258	11.4819	9.65175	col15a1b_-20809	61.6844	8.41505
col15a1b	756.123	29.5661	1264.42	753.316	618.513	276.386	108.86	27.6647	884.781	360.869	90.5414	470.094	1.23144	0.813734	0.130198	0.213854	chr2	24037441	24037559	chr2:24037441-24037559	119	*	Distal Intergenic	Distal Intergenic	2	23937824	24013083	75260	2	558137	NM_001172370	-24358	ENSDARG00000061848	collagen, type XV, alpha 1b	13.7641	18.4259	8.30256	14.2128	19.1628	19.0188	18.5754	27.211	24.9759	17.9502	11.4819	24.1294	col15a1b_-24358	17.3342	19.6343
col15a1b	756.123	29.5661	1264.42	753.316	618.513	276.386	108.86	27.6647	884.781	360.869	90.5414	470.094	1.23144	0.813734	0.130198	0.213854	chr2	24042775	24043062	chr2:24042775-24043062	288	*	Distal Intergenic	Distal Intergenic	2	23937824	24013083	75260	2	558137	NM_001172370	-29692	ENSDARG00000061848	collagen, type XV, alpha 1b	9.63489	8.67103	17.7912	45.684	29.1607	26.3337	52.6302	30.6124	6.24397	14.3602	14.7624	9.65175	col15a1b_-29692	27.5648	11.2546
col15a1b	756.123	29.5661	1264.42	753.316	618.513	276.386	108.86	27.6647	884.781	360.869	90.5414	470.094	1.23144	0.813734	0.130198	0.213854	chr2	24045271	24045483	chr2:24045271-24045483	213	*	Distal Intergenic	Distal Intergenic	2	23937824	24013083	75260	2	558137	NM_001172370	-32188	ENSDARG00000061848	collagen, type XV, alpha 1b	1.37641	2.16776	7.11648	1.0152	1.66633	1.46298	6.19179	1.70069	16.2343	10.7701	1.64027	1.60862	col15a1b_-32188	2.8372	7.56334
crip2	4085.94	3648.01	3335.41	5303.18	2127	211.276	98.9633	229.064	308.533	169.388	135.812	1786.6	4.26705	0.344533	3.15029e-35	1.99063e-33	chr17	37447358	37447558	chr17:37447358-37447558	201	*	Exon (NM_213497/554826, exon 7 of 8)	Exon	17	37445525	37474633	29109	2	554826	NM_213497	27075	ENSDARG00000070670	cysteine-rich protein 2	17.8934	7.58715	24.9077	6.0912	7.49848	1.46298	9.28769	15.3062	4.99517	6.88093	5.74095	8.04312	crip2_27075	11.2543	6.41504
crip2	4085.94	3648.01	3335.41	5303.18	2127	211.276	98.9633	229.064	308.533	169.388	135.812	1786.6	4.26705	0.344533	3.15029e-35	1.99063e-33	chr17	37452309	37452839	chr17:37452309-37452839	531	*	Exon (NM_213497/554826, exon 3 of 8)	Exon	17	37445525	37474633	29109	2	554826	NM_213497	21794	ENSDARG00000070670	cysteine-rich protein 2	48.1744	14.0904	24.9077	23.3496	24.1618	38.0376	30.959	11.9048	19.9807	13.7619	7.38122	20.9121	crip2_21794	26.9482	15.509
crip2	4085.94	3648.01	3335.41	5303.18	2127	211.276	98.9633	229.064	308.533	169.388	135.812	1786.6	4.26705	0.344533	3.15029e-35	1.99063e-33	chr17	37454953	37455076	chr17:37454953-37455076	124	*	Intron (NM_213497/554826, intron 2 of 7)	Intron	17	37445525	37474633	29109	2	554826	NM_213497	19557	ENSDARG00000070670	cysteine-rich protein 2	1.37641	2.16776	2.37216	10.152	10.8311	4.38895	6.19179	5.10206	7.49276	6.58176	3.28054	4.82587	crip2_19557	5.32278	5.54523
crip2	4085.94	3648.01	3335.41	5303.18	2127	211.276	98.9633	229.064	308.533	169.388	135.812	1786.6	4.26705	0.344533	3.15029e-35	1.99063e-33	chr17	37460543	37460873	chr17:37460543-37460873	331	*	Intron (NM_213497/554826, intron 1 of 7)	Intron	17	37445525	37474633	29109	2	554826	NM_213497	13760	ENSDARG00000070670	cysteine-rich protein 2	9.63489	18.4259	21.3494	35.532	8.33164	7.31492	18.5754	3.40138	11.2391	9.57346	10.6618	4.82587	crip2_13760	15.3207	9.07506
crip2	4085.94	3648.01	3335.41	5303.18	2127	211.276	98.9633	229.064	308.533	169.388	135.812	1786.6	4.26705	0.344533	3.15029e-35	1.99063e-33	chr17	37460894	37461099	chr17:37460894-37461099	206	*	Intron (NM_213497/554826, intron 1 of 7)	Intron	17	37445525	37474633	29109	2	554826	NM_213497	13534	ENSDARG00000070670	cysteine-rich protein 2	13.7641	5.41939	9.48864	21.3192	2.49949	1.46298	23.2192	6.80275	6.24397	7.1801	5.74095	1.60862	crip2_13534	10.497	5.19341
crip2	4085.94	3648.01	3335.41	5303.18	2127	211.276	98.9633	229.064	308.533	169.388	135.812	1786.6	4.26705	0.344533	3.15029e-35	1.99063e-33	chr17	37465116	37465260	chr17:37465116-37465260	145	*	Intron (NM_213497/554826, intron 1 of 7)	Intron	17	37445525	37474633	29109	2	554826	NM_213497	9373	ENSDARG00000070670	cysteine-rich protein 2	4.12924	3.25164	13.0469	16.2432	6.66531	19.0188	10.8356	15.3062	3.74638	3.59005	1.64027	4.82587	crip2_9373	11.0621	3.45064
crip2	4085.94	3648.01	3335.41	5303.18	2127	211.276	98.9633	229.064	308.533	169.388	135.812	1786.6	4.26705	0.344533	3.15029e-35	1.99063e-33	chr17	37465859	37466279	chr17:37465859-37466279	421	*	Intron (NM_213497/554826, intron 1 of 7)	Intron	17	37445525	37474633	29109	2	554826	NM_213497	8354	ENSDARG00000070670	cysteine-rich protein 2	12.3877	31.4325	28.4659	44.6688	71.6521	38.0376	23.2192	10.2041	13.7367	14.6594	19.6832	1.60862	crip2_8354	32.5085	12.422
crip2	4085.94	3648.01	3335.41	5303.18	2127	211.276	98.9633	229.064	308.533	169.388	135.812	1786.6	4.26705	0.344533	3.15029e-35	1.99063e-33	chr17	37468512	37468746	chr17:37468512-37468746	235	*	Intron (NM_213497/554826, intron 1 of 7)	Intron	17	37445525	37474633	29109	2	554826	NM_213497	5887	ENSDARG00000070670	cysteine-rich protein 2	20.6462	7.58715	15.419	21.3192	9.1648	19.0188	3.0959	1.70069	1.24879	3.59005	0.820135	1.60862	crip2_5887	12.244	1.8169
crip2	4085.94	3648.01	3335.41	5303.18	2127	211.276	98.9633	229.064	308.533	169.388	135.812	1786.6	4.26705	0.344533	3.15029e-35	1.99063e-33	chr17	37468954	37469207	chr17:37468954-37469207	254	*	Intron (NM_213497/554826, intron 1 of 7)	Intron	17	37445525	37474633	29109	2	554826	NM_213497	5426	ENSDARG00000070670	cysteine-rich protein 2	6.88206	9.75491	3.55824	16.2432	36.6592	21.9448	29.411	8.50344	3.74638	5.38507	6.56108	8.04312	crip2_5426	16.6196	5.93391
crip2	4085.94	3648.01	3335.41	5303.18	2127	211.276	98.9633	229.064	308.533	169.388	135.812	1786.6	4.26705	0.344533	3.15029e-35	1.99063e-33	chr17	37474539	37475474	chr17:37474539-37475474	936	*	Promoter (<=1kb)	Promoter	17	37445525	37474633	29109	2	554826	NM_213497	0	ENSDARG00000070670	cysteine-rich protein 2	640.032	320.828	970.213	1021.29	642.369	905.588	668.714	375.852	63.6884	45.4739	61.5101	69.1709	crip2_0	693.111	59.9608
crip2	4085.94	3648.01	3335.41	5303.18	2127	211.276	98.9633	229.064	308.533	169.388	135.812	1786.6	4.26705	0.344533	3.15029e-35	1.99063e-33	chr17	37493196	37493579	chr17:37493196-37493579	384	*	Distal Intergenic	Distal Intergenic	17	37445525	37474633	29109	2	554826	NM_213497	-18563	ENSDARG00000070670	cysteine-rich protein 2	60.5621	34.6841	40.3267	70.0489	70.8189	83.3901	63.4659	49.3199	38.7126	22.4378	33.6255	27.3466	crip2_-18563	59.0771	30.5306
crip2	4085.94	3648.01	3335.41	5303.18	2127	211.276	98.9633	229.064	308.533	169.388	135.812	1786.6	4.26705	0.344533	3.15029e-35	1.99063e-33	chr17	37499223	37499852	chr17:37499223-37499852	630	*	Distal Intergenic	Distal Intergenic	17	37445525	37474633	29109	2	554826	NM_213497	-24590	ENSDARG00000070670	cysteine-rich protein 2	49.5508	58.5294	189.773	227.405	169.965	258.948	92.8769	129.252	18.7319	17.9502	50.0282	30.5639	crip2_-24590	147.038	29.3186
crip2	4085.94	3648.01	3335.41	5303.18	2127	211.276	98.9633	229.064	308.533	169.388	135.812	1786.6	4.26705	0.344533	3.15029e-35	1.99063e-33	chr17	37499885	37500070	chr17:37499885-37500070	186	*	Distal Intergenic	Distal Intergenic	17	37445525	37474633	29109	2	554826	NM_213497	-25252	ENSDARG00000070670	cysteine-rich protein 2	1.37641	11.9227	4.74432	10.152	11.6643	16.0928	10.8356	23.8096	3.74638	6.28258	0.820135	1.60862	crip2_-25252	11.3247	3.11443
crip2	4085.94	3648.01	3335.41	5303.18	2127	211.276	98.9633	229.064	308.533	169.388	135.812	1786.6	4.26705	0.344533	3.15029e-35	1.99063e-33	chr17	37510655	37511426	chr17:37510655-37511426	772	*	Distal Intergenic	Distal Intergenic	17	37445525	37474633	29109	2	554826	NM_213497	-36022	ENSDARG00000070670	cysteine-rich protein 2	152.782	136.569	285.845	252.785	164.966	261.874	229.096	107.143	44.9566	41.8839	69.7115	57.9105	crip2_-36022	198.883	53.6156
crip2	4085.94	3648.01	3335.41	5303.18	2127	211.276	98.9633	229.064	308.533	169.388	135.812	1786.6	4.26705	0.344533	3.15029e-35	1.99063e-33	chr17	37515873	37516219	chr17:37515873-37516219	347	*	Distal Intergenic	Distal Intergenic	17	37445525	37474633	29109	2	554826	NM_213497	-41240	ENSDARG00000070670	cysteine-rich protein 2	5.50565	5.41939	1.18608	8.12161	6.66531	14.6298	4.64384	5.10206	33.7174	7.47927	19.6832	24.1294	crip2_-41240	6.40922	21.2523
crip2	4085.94	3648.01	3335.41	5303.18	2127	211.276	98.9633	229.064	308.533	169.388	135.812	1786.6	4.26705	0.344533	3.15029e-35	1.99063e-33	chr17	37527251	37527426	chr17:37527251-37527426	176	*	Distal Intergenic	Distal Intergenic	17	37445525	37474633	29109	2	554826	NM_213497	-52618	ENSDARG00000070670	cysteine-rich protein 2	13.7641	16.2582	10.6747	32.4864	28.3276	10.2409	17.0274	28.9117	23.7271	12.5652	10.6618	16.0862	crip2_-52618	19.7114	15.7601
crip2	4085.94	3648.01	3335.41	5303.18	2127	211.276	98.9633	229.064	308.533	169.388	135.812	1786.6	4.26705	0.344533	3.15029e-35	1.99063e-33	chr17	37533275	37533937	chr17:37533275-37533937	663	*	Distal Intergenic	Distal Intergenic	17	37445525	37474633	29109	2	554826	NM_213497	-58642	ENSDARG00000070670	cysteine-rich protein 2	229.861	81.2909	430.547	479.175	332.432	296.986	174.918	232.994	31.2198	29.0196	82.0135	24.1294	crip2_-58642	282.276	41.5956
crip2	4085.94	3648.01	3335.41	5303.18	2127	211.276	98.9633	229.064	308.533	169.388	135.812	1786.6	4.26705	0.344533	3.15029e-35	1.99063e-33	chr17	37536573	37536776	chr17:37536573-37536776	204	*	Distal Intergenic	Distal Intergenic	17	37445525	37474633	29109	2	554826	NM_213497	-61940	ENSDARG00000070670	cysteine-rich protein 2	1.37641	4.33551	5.9304	4.0608	6.66531	1.46298	4.64384	5.10206	6.24397	7.77844	8.20135	12.869	crip2_-61940	4.19717	8.77319
crip2	4085.94	3648.01	3335.41	5303.18	2127	211.276	98.9633	229.064	308.533	169.388	135.812	1786.6	4.26705	0.344533	3.15029e-35	1.99063e-33	chr17	37542531	37542970	chr17:37542531-37542970	440	*	Distal Intergenic	Distal Intergenic	17	37445525	37474633	29109	2	554826	NM_213497	-67898	ENSDARG00000070670	cysteine-rich protein 2	52.3037	32.5164	43.8849	75.1249	75.8179	38.0376	35.6028	61.2248	21.2295	11.9668	8.20135	22.5207	crip2_-67898	51.8141	15.9796
crip2	4085.94	3648.01	3335.41	5303.18	2127	211.276	98.9633	229.064	308.533	169.388	135.812	1786.6	4.26705	0.344533	3.15029e-35	1.99063e-33	chr17	37544791	37544909	chr17:37544791-37544909	119	*	Distal Intergenic	Distal Intergenic	17	37445525	37474633	29109	2	554826	NM_213497	-70158	ENSDARG00000070670	cysteine-rich protein 2	6.88206	7.58715	5.9304	1.0152	5.83215	7.31492	10.8356	5.10206	11.2391	10.7701	12.302	8.04312	crip2_-70158	6.31245	10.5886
crip2	4085.94	3648.01	3335.41	5303.18	2127	211.276	98.9633	229.064	308.533	169.388	135.812	1786.6	4.26705	0.344533	3.15029e-35	1.99063e-33	chr17	37559140	37559605	chr17:37559140-37559605	466	*	Distal Intergenic	Distal Intergenic	17	37445525	37474633	29109	2	554826	NM_213497	-84507	ENSDARG00000070670	cysteine-rich protein 2	15.1405	13.0065	17.7912	30.456	14.1638	24.8707	34.0549	11.9048	11.2391	13.7619	10.6618	17.6949	crip2_-84507	20.1736	13.3394
csf1ra	64.0904	10.6135	39.127	146.44	43.3813	1141.42	1798.93	862.031	1067.26	564.134	551.813	571.749	-4.03741	0.54995	2.11349e-13	3.00146e-12	chr14	3137472	3137592	chr14:3137472-3137592	121	*	Distal Intergenic	Distal Intergenic	14	3143337	3180939	37603	2	64274	NM_131672	43347	ENSDARG00000102986	colony stimulating factor 1 receptor, a	48.1744	40.1035	1.18608	7.10641	4.16582	5.85194	1.54795	3.40138	46.2053	12.8643	41.0068	75.6054	csf1ra_43347	13.9422	43.9204
csf1ra	64.0904	10.6135	39.127	146.44	43.3813	1141.42	1798.93	862.031	1067.26	564.134	551.813	571.749	-4.03741	0.54995	2.11349e-13	3.00146e-12	chr14	3137635	3137848	chr14:3137635-3137848	214	*	Distal Intergenic	Distal Intergenic	14	3143337	3180939	37603	2	64274	NM_131672	43091	ENSDARG00000102986	colony stimulating factor 1 receptor, a	34.4103	36.8519	41.5128	25.38	22.4954	36.5746	12.3836	10.2041	22.4783	8.97512	27.0645	36.9984	csf1ra_43091	27.4766	23.8791
csf1ra	64.0904	10.6135	39.127	146.44	43.3813	1141.42	1798.93	862.031	1067.26	564.134	551.813	571.749	-4.03741	0.54995	2.11349e-13	3.00146e-12	chr14	3143733	3144131	chr14:3143733-3144131	399	*	3' UTR	3' UTR	14	3143337	3180939	37603	2	64274	NM_131672	36808	ENSDARG00000102986	colony stimulating factor 1 receptor, a	37.1631	19.5098	154.19	108.626	106.645	102.409	38.6987	64.6261	16.2343	11.9668	9.84162	8.04312	csf1ra_36808	78.9836	11.5215
csf1ra	64.0904	10.6135	39.127	146.44	43.3813	1141.42	1798.93	862.031	1067.26	564.134	551.813	571.749	-4.03741	0.54995	2.11349e-13	3.00146e-12	chr14	3149855	3150148	chr14:3149855-3150148	294	*	Intron (NM_131672/64274, intron 19 of 21)	Intron	14	3143337	3180939	37603	2	64274	NM_131672	30791	ENSDARG00000102986	colony stimulating factor 1 receptor, a	20.6462	9.75491	41.5128	23.3496	24.1618	10.2409	10.8356	11.9048	1.24879	2.09419	5.74095	4.82587	csf1ra_30791	19.0508	3.47745
csf1ra	64.0904	10.6135	39.127	146.44	43.3813	1141.42	1798.93	862.031	1067.26	564.134	551.813	571.749	-4.03741	0.54995	2.11349e-13	3.00146e-12	chr14	3154216	3154481	chr14:3154216-3154481	266	*	Exon (NM_131672/64274, exon 17 of 22)	Exon	14	3143337	3180939	37603	2	64274	NM_131672	26458	ENSDARG00000102986	colony stimulating factor 1 receptor, a	12.3877	16.2582	5.9304	1.0152	4.16582	8.77791	1.54795	3.40138	4.99517	8.67595	9.02149	8.04312	csf1ra_26458	6.68557	7.68393
csf1ra	64.0904	10.6135	39.127	146.44	43.3813	1141.42	1798.93	862.031	1067.26	564.134	551.813	571.749	-4.03741	0.54995	2.11349e-13	3.00146e-12	chr14	3161449	3161739	chr14:3161449-3161739	291	*	Exon (NM_131672/64274, exon 14 of 22)	Exon	14	3143337	3180939	37603	2	64274	NM_131672	19200	ENSDARG00000102986	colony stimulating factor 1 receptor, a	6.88206	1.08388	3.55824	1.0152	12.4975	7.31492	1.54795	10.2041	12.4879	11.0693	9.84162	9.65175	csf1ra_19200	5.51298	10.7627
csf1ra	64.0904	10.6135	39.127	146.44	43.3813	1141.42	1798.93	862.031	1067.26	564.134	551.813	571.749	-4.03741	0.54995	2.11349e-13	3.00146e-12	chr14	3161845	3161985	chr14:3161845-3161985	141	*	Intron (NM_131672/64274, intron 12 of 21)	Intron	14	3143337	3180939	37603	2	64274	NM_131672	18954	ENSDARG00000102986	colony stimulating factor 1 receptor, a	23.399	31.4325	5.9304	5.076	0.833164	2.92597	7.73974	1.70069	33.7174	15.856	31.9853	53.0846	csf1ra_18954	9.87968	33.6608
csf1ra	64.0904	10.6135	39.127	146.44	43.3813	1141.42	1798.93	862.031	1067.26	564.134	551.813	571.749	-4.03741	0.54995	2.11349e-13	3.00146e-12	chr14	3167368	3167587	chr14:3167368-3167587	220	*	Exon (NM_131672/64274, exon 8 of 22)	Exon	14	3143337	3180939	37603	2	64274	NM_131672	13352	ENSDARG00000102986	colony stimulating factor 1 receptor, a	1.37641	7.58715	10.6747	4.0608	4.16582	4.38895	1.54795	5.10206	1.24879	6.88093	5.74095	1.60862	csf1ra_13352	4.86298	3.86982
csf1ra	64.0904	10.6135	39.127	146.44	43.3813	1141.42	1798.93	862.031	1067.26	564.134	551.813	571.749	-4.03741	0.54995	2.11349e-13	3.00146e-12	chr14	3173519	3173639	chr14:3173519-3173639	121	*	Intron (NM_131672/64274, intron 3 of 21)	Intron	14	3143337	3180939	37603	2	64274	NM_131672	7300	ENSDARG00000102986	colony stimulating factor 1 receptor, a	1.37641	1.08388	8.30256	3.0456	7.49848	13.1669	1.54795	8.50344	3.74638	8.67595	7.38122	1.60862	csf1ra_7300	5.56565	5.35304
csf1ra	64.0904	10.6135	39.127	146.44	43.3813	1141.42	1798.93	862.031	1067.26	564.134	551.813	571.749	-4.03741	0.54995	2.11349e-13	3.00146e-12	chr14	3176649	3176806	chr14:3176649-3176806	158	*	Intron (NM_131672/64274, intron 1 of 21)	Intron	14	3143337	3180939	37603	2	64274	NM_131672	4133	ENSDARG00000102986	colony stimulating factor 1 receptor, a	1.37641	10.8388	9.48864	1.0152	0.833164	1.46298	1.54795	1.70069	6.24397	5.38507	4.10068	20.9121	csf1ra_4133	3.53298	9.16046
csf1ra	64.0904	10.6135	39.127	146.44	43.3813	1141.42	1798.93	862.031	1067.26	564.134	551.813	571.749	-4.03741	0.54995	2.11349e-13	3.00146e-12	chr14	3182216	3182598	chr14:3182216-3182598	383	*	Promoter (1-2kb)	Promoter	14	3143337	3180939	37603	2	64274	NM_131672	-1277	ENSDARG00000102986	colony stimulating factor 1 receptor, a	89.4668	111.639	284.659	118.778	39.1587	45.3525	13.9315	49.3199	28.7222	14.6594	18.8631	33.7811	csf1ra_-1277	94.0383	24.0065
csf1ra	64.0904	10.6135	39.127	146.44	43.3813	1141.42	1798.93	862.031	1067.26	564.134	551.813	571.749	-4.03741	0.54995	2.11349e-13	3.00146e-12	chr14	3187195	3187450	chr14:3187195-3187450	256	*	Downstream (2-3kb)	Downstream	14	3143337	3180939	37603	2	64274	NM_131672	-6256	ENSDARG00000102986	colony stimulating factor 1 receptor, a	13.7641	5.41939	3.55824	1.0152	8.33164	5.85194	10.8356	1.70069	3.74638	7.1801	5.74095	9.65175	csf1ra_-6256	6.30961	6.57979
ctsba	4690.12	3227.26	2810.28	2636.6	3938.5	6893.7	8819.83	6492.35	5643.63	3183.01	2560.85	4626.92	-0.694189	0.351344	0.0481764	0.0950132	chr17	32622768	32623069	chr17:32622768-32623069	302	*	Promoter (<=1kb)	Promoter	17	32622903	32630283	7381	1	406645	NM_213336	0	ENSDARG00000055120	cathepsin Ba	61.9386	41.1874	107.933	135.022	89.9817	122.891	54.1782	39.1158	23.7271	11.0693	22.9638	28.9552	ctsba_0	81.5309	21.6789
ctsba	4690.12	3227.26	2810.28	2636.6	3938.5	6893.7	8819.83	6492.35	5643.63	3183.01	2560.85	4626.92	-0.694189	0.351344	0.0481764	0.0950132	chr17	32623872	32624045	chr17:32623872-32624045	174	*	Promoter (<=1kb)	Promoter	17	32622903	32630283	7381	1	406645	NM_213336	969	ENSDARG00000055120	cathepsin Ba	19.2698	3.25164	8.30256	4.0608	18.3296	26.3337	10.8356	1.70069	6.24397	6.58176	3.28054	4.82587	ctsba_969	11.5106	5.23303
ctsba	4690.12	3227.26	2810.28	2636.6	3938.5	6893.7	8819.83	6492.35	5643.63	3183.01	2560.85	4626.92	-0.694189	0.351344	0.0481764	0.0950132	chr17	32627382	32627504	chr17:32627382-32627504	123	*	Intron (NM_213336/406645, intron 5 of 9)	Intron	17	32622903	32630283	7381	1	406645	NM_213336	4479	ENSDARG00000055120	cathepsin Ba	6.88206	10.8388	4.74432	3.0456	6.66531	4.38895	4.64384	13.6055	12.4879	8.97512	15.5826	12.869	ctsba_4479	6.8518	12.4787
ctsba	4690.12	3227.26	2810.28	2636.6	3938.5	6893.7	8819.83	6492.35	5643.63	3183.01	2560.85	4626.92	-0.694189	0.351344	0.0481764	0.0950132	chr17	32629381	32629603	chr17:32629381-32629603	223	*	Exon (NM_213336/406645, exon 8 of 10)	Exon	17	32622903	32630283	7381	1	406645	NM_213336	6478	ENSDARG00000055120	cathepsin Ba	15.1405	20.5937	27.2798	18.2736	15.8301	14.6298	9.28769	8.50344	7.49276	5.38507	3.28054	3.21725	ctsba_6478	16.1923	4.84391
ctsba	4690.12	3227.26	2810.28	2636.6	3938.5	6893.7	8819.83	6492.35	5643.63	3183.01	2560.85	4626.92	-0.694189	0.351344	0.0481764	0.0950132	chr17	32635550	32635786	chr17:32635550-32635786	237	*	Distal Intergenic	Distal Intergenic	17	32622903	32630283	7381	1	406645	NM_213336	12647	ENSDARG00000055120	cathepsin Ba	13.7641	9.75491	17.7912	28.4256	19.1628	26.3337	17.0274	10.2041	11.2391	9.27429	11.4819	9.65175	ctsba_12647	17.808	10.4118
ctsba	4690.12	3227.26	2810.28	2636.6	3938.5	6893.7	8819.83	6492.35	5643.63	3183.01	2560.85	4626.92	-0.694189	0.351344	0.0481764	0.0950132	chr17	32635921	32636314	chr17:32635921-32636314	394	*	Distal Intergenic	Distal Intergenic	17	32622903	32630283	7381	1	406645	NM_213336	13018	ENSDARG00000055120	cathepsin Ba	30.2811	14.0904	27.2798	23.3496	31.6602	46.8155	26.3151	27.211	23.7271	24.8312	26.2443	16.0862	ctsba_13018	28.3754	22.7222
ctsba	4690.12	3227.26	2810.28	2636.6	3938.5	6893.7	8819.83	6492.35	5643.63	3183.01	2560.85	4626.92	-0.694189	0.351344	0.0481764	0.0950132	chr17	32636471	32636671	chr17:32636471-32636671	201	*	Distal Intergenic	Distal Intergenic	17	32622903	32630283	7381	1	406645	NM_213336	13568	ENSDARG00000055120	cathepsin Ba	26.1518	14.0904	17.7912	25.38	7.49848	36.5746	27.8631	23.8096	11.2391	4.48756	16.4027	4.82587	ctsba_13568	22.3949	9.23882
ctsba	4690.12	3227.26	2810.28	2636.6	3938.5	6893.7	8819.83	6492.35	5643.63	3183.01	2560.85	4626.92	-0.694189	0.351344	0.0481764	0.0950132	chr17	32643957	32644208	chr17:32643957-32644208	252	*	Distal Intergenic	Distal Intergenic	17	32622903	32630283	7381	1	406645	NM_213336	21054	ENSDARG00000055120	cathepsin Ba	13.7641	4.33551	1.18608	13.1976	1.66633	7.31492	10.8356	1.70069	1.24879	7.47927	4.92081	16.0862	ctsba_21054	6.75011	7.43378
ctsba	4690.12	3227.26	2810.28	2636.6	3938.5	6893.7	8819.83	6492.35	5643.63	3183.01	2560.85	4626.92	-0.694189	0.351344	0.0481764	0.0950132	chr17	32648054	32648232	chr17:32648054-32648232	179	*	Distal Intergenic	Distal Intergenic	17	32622903	32630283	7381	1	406645	NM_213336	25151	ENSDARG00000055120	cathepsin Ba	1.37641	4.33551	1.18608	10.152	4.16582	1.46298	4.64384	6.80275	12.4879	14.061	15.5826	4.82587	ctsba_25151	4.26568	11.7393
ctsba	4690.12	3227.26	2810.28	2636.6	3938.5	6893.7	8819.83	6492.35	5643.63	3183.01	2560.85	4626.92	-0.694189	0.351344	0.0481764	0.0950132	chr17	32653572	32654046	chr17:32653572-32654046	475	*	Distal Intergenic	Distal Intergenic	17	32622903	32630283	7381	1	406645	NM_213336	30669	ENSDARG00000055120	cathepsin Ba	42.6688	24.9292	5.9304	5.076	7.49848	14.6298	9.28769	5.10206	31.2198	19.1469	2.46041	9.65175	ctsba_30669	14.3903	15.6197
ctsba	4690.12	3227.26	2810.28	2636.6	3938.5	6893.7	8819.83	6492.35	5643.63	3183.01	2560.85	4626.92	-0.694189	0.351344	0.0481764	0.0950132	chr17	32655574	32655690	chr17:32655574-32655690	117	*	Distal Intergenic	Distal Intergenic	17	32622903	32630283	7381	1	406645	NM_213336	32671	ENSDARG00000055120	cathepsin Ba	1.37641	9.75491	1.18608	1.0152	1.66633	1.46298	1.54795	5.10206	1.24879	4.48756	4.92081	4.82587	ctsba_32671	2.88899	3.87076
ctsba	4690.12	3227.26	2810.28	2636.6	3938.5	6893.7	8819.83	6492.35	5643.63	3183.01	2560.85	4626.92	-0.694189	0.351344	0.0481764	0.0950132	chr17	32662185	32662440	chr17:32662185-32662440	256	*	Distal Intergenic	Distal Intergenic	17	32622903	32630283	7381	1	406645	NM_213336	39282	ENSDARG00000055120	cathepsin Ba	1.37641	5.41939	3.55824	1.0152	6.66531	5.85194	1.54795	5.10206	3.74638	9.57346	16.4027	6.4345	ctsba_39282	3.81706	9.03926
ctsba	4690.12	3227.26	2810.28	2636.6	3938.5	6893.7	8819.83	6492.35	5643.63	3183.01	2560.85	4626.92	-0.694189	0.351344	0.0481764	0.0950132	chr17	32665918	32666147	chr17:32665918-32666147	230	*	Distal Intergenic	Distal Intergenic	17	32622903	32630283	7381	1	406645	NM_213336	43015	ENSDARG00000055120	cathepsin Ba	2.75282	3.25164	1.18608	11.1672	12.4975	14.6298	4.64384	5.10206	6.24397	4.78673	4.92081	16.0862	ctsba_43015	6.90387	8.00944
ctsba	4690.12	3227.26	2810.28	2636.6	3938.5	6893.7	8819.83	6492.35	5643.63	3183.01	2560.85	4626.92	-0.694189	0.351344	0.0481764	0.0950132	chr17	32668652	32668817	chr17:32668652-32668817	166	*	Distal Intergenic	Distal Intergenic	17	32622903	32630283	7381	1	406645	NM_213336	45749	ENSDARG00000055120	cathepsin Ba	38.5395	31.4325	4.74432	1.0152	2.49949	1.46298	4.64384	6.80275	53.6981	17.0527	30.345	77.214	ctsba_45749	11.3926	44.5775
ctsba	4690.12	3227.26	2810.28	2636.6	3938.5	6893.7	8819.83	6492.35	5643.63	3183.01	2560.85	4626.92	-0.694189	0.351344	0.0481764	0.0950132	chr17	32677852	32678176	chr17:32677852-32678176	325	*	Distal Intergenic	Distal Intergenic	17	32622903	32630283	7381	1	406645	NM_213336	54949	ENSDARG00000055120	cathepsin Ba	4.12924	1.08388	5.9304	2.0304	4.99898	8.77791	1.54795	13.6055	4.99517	10.471	11.4819	14.4776	ctsba_54949	5.26303	10.3564
ctsba	4690.12	3227.26	2810.28	2636.6	3938.5	6893.7	8819.83	6492.35	5643.63	3183.01	2560.85	4626.92	-0.694189	0.351344	0.0481764	0.0950132	chr17	32693219	32693560	chr17:32693219-32693560	342	*	Distal Intergenic	Distal Intergenic	17	32622903	32630283	7381	1	406645	NM_213336	70316	ENSDARG00000055120	cathepsin Ba	20.6462	15.1743	1.18608	1.0152	9.1648	1.46298	1.54795	13.6055	11.2391	11.9668	19.6832	27.3466	ctsba_70316	7.97538	17.559
ctsba	4690.12	3227.26	2810.28	2636.6	3938.5	6893.7	8819.83	6492.35	5643.63	3183.01	2560.85	4626.92	-0.694189	0.351344	0.0481764	0.0950132	chr17	32698368	32698526	chr17:32698368-32698526	159	*	Distal Intergenic	Distal Intergenic	17	32622903	32630283	7381	1	406645	NM_213336	75465	ENSDARG00000055120	cathepsin Ba	4.12924	8.67103	5.9304	11.1672	11.6643	5.85194	3.0959	10.2041	7.49276	7.47927	2.46041	11.2604	ctsba_75465	7.58927	7.1732
ctsc	1234.28	1106.08	518.948	799.632	1121.34	675.019	1261.23	493.538	1655.51	1299.13	1688.48	1077.56	-0.302169	0.381736	0.428614	0.545007	chr15	43518960	43519262	chr15:43518960-43519262	303	*	Distal Intergenic	Distal Intergenic	15	43604031	43625549	21519	2	368704	NM_214722	106287	ENSDARG00000101334	cathepsin C	66.0678	41.1874	60.4901	27.4104	24.9949	13.1669	29.411	23.8096	19.9807	4.48756	13.9423	1.60862	ctsc_106287	35.8173	10.0048
ctsc	1234.28	1106.08	518.948	799.632	1121.34	675.019	1261.23	493.538	1655.51	1299.13	1688.48	1077.56	-0.302169	0.381736	0.428614	0.545007	chr15	43528544	43528768	chr15:43528544-43528768	225	*	Distal Intergenic	Distal Intergenic	15	43604031	43625549	21519	2	368704	NM_214722	96781	ENSDARG00000101334	cathepsin C	8.25847	16.2582	13.0469	9.13681	12.4975	27.7967	40.2466	18.7076	1.24879	11.0693	12.302	9.65175	ctsc_96781	18.2436	8.56797
ctsc	1234.28	1106.08	518.948	799.632	1121.34	675.019	1261.23	493.538	1655.51	1299.13	1688.48	1077.56	-0.302169	0.381736	0.428614	0.545007	chr15	43533925	43534131	chr15:43533925-43534131	207	*	Distal Intergenic	Distal Intergenic	15	43604031	43625549	21519	2	368704	NM_214722	91418	ENSDARG00000101334	cathepsin C	15.1405	3.25164	10.6747	7.10641	9.1648	4.38895	13.9315	15.3062	14.9855	17.6511	12.302	20.9121	ctsc_91418	9.8706	16.4627
ctsc	1234.28	1106.08	518.948	799.632	1121.34	675.019	1261.23	493.538	1655.51	1299.13	1688.48	1077.56	-0.302169	0.381736	0.428614	0.545007	chr15	43575528	43575809	chr15:43575528-43575809	282	*	Distal Intergenic	Distal Intergenic	15	43604031	43625549	21519	2	368704	NM_214722	49740	ENSDARG00000101334	cathepsin C	41.2924	5.41939	39.1406	11.1672	52.4893	65.8343	20.1233	22.1089	1.24879	5.38507	4.10068	14.4776	ctsc_49740	32.1969	6.30304
ctsc	1234.28	1106.08	518.948	799.632	1121.34	675.019	1261.23	493.538	1655.51	1299.13	1688.48	1077.56	-0.302169	0.381736	0.428614	0.545007	chr15	43583077	43583187	chr15:43583077-43583187	111	*	Distal Intergenic	Distal Intergenic	15	43604031	43625549	21519	2	368704	NM_214722	42362	ENSDARG00000101334	cathepsin C	2.75282	5.41939	3.55824	2.0304	0.833164	1.46298	1.54795	1.70069	2.49759	5.98341	10.6618	1.60862	ctsc_42362	2.41321	5.18784
ctsc	1234.28	1106.08	518.948	799.632	1121.34	675.019	1261.23	493.538	1655.51	1299.13	1688.48	1077.56	-0.302169	0.381736	0.428614	0.545007	chr15	43589422	43589640	chr15:43589422-43589640	219	*	Distal Intergenic	Distal Intergenic	15	43604031	43625549	21519	2	368704	NM_214722	35909	ENSDARG00000101334	cathepsin C	2.75282	7.58715	15.419	7.10641	5.83215	11.7039	7.73974	22.1089	3.74638	6.58176	5.74095	3.21725	ctsc_35909	10.0313	4.82158
ctsc	1234.28	1106.08	518.948	799.632	1121.34	675.019	1261.23	493.538	1655.51	1299.13	1688.48	1077.56	-0.302169	0.381736	0.428614	0.545007	chr15	43592668	43592930	chr15:43592668-43592930	263	*	Distal Intergenic	Distal Intergenic	15	43604031	43625549	21519	2	368704	NM_214722	32619	ENSDARG00000101334	cathepsin C	20.6462	22.7614	58.1179	29.4408	27.4944	21.9448	26.3151	22.1089	1.24879	3.88922	9.02149	1.60862	ctsc_32619	28.6037	3.94203
ctsc	1234.28	1106.08	518.948	799.632	1121.34	675.019	1261.23	493.538	1655.51	1299.13	1688.48	1077.56	-0.302169	0.381736	0.428614	0.545007	chr15	43593582	43593958	chr15:43593582-43593958	377	*	Distal Intergenic	Distal Intergenic	15	43604031	43625549	21519	2	368704	NM_214722	31591	ENSDARG00000101334	cathepsin C	59.1857	44.439	87.7699	55.836	35.8261	59.9824	54.1782	32.3131	17.4831	9.57346	13.1222	20.9121	ctsc_31591	53.6913	15.2727
ctsc	1234.28	1106.08	518.948	799.632	1121.34	675.019	1261.23	493.538	1655.51	1299.13	1688.48	1077.56	-0.302169	0.381736	0.428614	0.545007	chr15	43604925	43605159	chr15:43604925-43605159	235	*	3' UTR	3' UTR	15	43604031	43625549	21519	2	368704	NM_214722	20390	ENSDARG00000101334	cathepsin C	1.37641	14.0904	5.9304	9.13681	7.49848	1.46298	10.8356	10.2041	6.24397	4.48756	2.46041	1.60862	ctsc_20390	7.56691	3.70014
ctsc	1234.28	1106.08	518.948	799.632	1121.34	675.019	1261.23	493.538	1655.51	1299.13	1688.48	1077.56	-0.302169	0.381736	0.428614	0.545007	chr15	43605722	43606204	chr15:43605722-43606204	483	*	Exon (NM_214722/368704, exon 7 of 7)	Exon	15	43604031	43625549	21519	2	368704	NM_214722	19345	ENSDARG00000101334	cathepsin C	9.63489	7.58715	3.55824	5.076	7.49848	4.38895	6.19179	17.0069	21.2295	20.3436	26.2443	38.607	ctsc_19345	7.6178	26.6061
ctsc	1234.28	1106.08	518.948	799.632	1121.34	675.019	1261.23	493.538	1655.51	1299.13	1688.48	1077.56	-0.302169	0.381736	0.428614	0.545007	chr15	43612595	43612718	chr15:43612595-43612718	124	*	Intron (NM_214722/368704, intron 5 of 6)	Intron	15	43604031	43625549	21519	2	368704	NM_214722	12831	ENSDARG00000101334	cathepsin C	9.63489	5.41939	5.9304	5.076	12.4975	4.38895	7.73974	5.10206	26.2247	15.856	5.74095	24.1294	ctsc_12831	6.97361	17.9878
ctsc	1234.28	1106.08	518.948	799.632	1121.34	675.019	1261.23	493.538	1655.51	1299.13	1688.48	1077.56	-0.302169	0.381736	0.428614	0.545007	chr15	43614237	43614359	chr15:43614237-43614359	123	*	Exon (NM_214722/368704, exon 5 of 7)	Exon	15	43604031	43625549	21519	2	368704	NM_214722	11190	ENSDARG00000101334	cathepsin C	45.4216	24.9292	3.55824	1.0152	0.833164	1.46298	1.54795	1.70069	31.2198	6.28258	22.9638	46.6501	ctsc_11190	10.0586	26.7791
ctsc	1234.28	1106.08	518.948	799.632	1121.34	675.019	1261.23	493.538	1655.51	1299.13	1688.48	1077.56	-0.302169	0.381736	0.428614	0.545007	chr15	43619919	43620273	chr15:43619919-43620273	355	*	Exon (NM_214722/368704, exon 3 of 7)	Exon	15	43604031	43625549	21519	2	368704	NM_214722	5276	ENSDARG00000101334	cathepsin C	111.489	48.7745	138.771	25.38	36.6592	27.7967	20.1233	45.9186	6.24397	6.28258	10.6618	8.04312	ctsc_5276	56.8641	7.80786
ctsc	1234.28	1106.08	518.948	799.632	1121.34	675.019	1261.23	493.538	1655.51	1299.13	1688.48	1077.56	-0.302169	0.381736	0.428614	0.545007	chr15	43623689	43624067	chr15:43623689-43624067	379	*	Promoter (1-2kb)	Promoter	15	43604031	43625549	21519	2	368704	NM_214722	1482	ENSDARG00000101334	cathepsin C	23.399	20.5937	58.1179	35.532	32.4934	24.8707	17.0274	8.50344	22.4783	10.7701	10.6618	8.04312	ctsc_1482	27.5672	12.9883
ctsc	1234.28	1106.08	518.948	799.632	1121.34	675.019	1261.23	493.538	1655.51	1299.13	1688.48	1077.56	-0.302169	0.381736	0.428614	0.545007	chr15	43625224	43625964	chr15:43625224-43625964	741	*	Promoter (<=1kb)	Promoter	15	43604031	43625549	21519	2	368704	NM_214722	0	ENSDARG00000101334	cathepsin C	34.4103	48.7745	73.5369	43.6536	61.6541	45.3525	37.1508	49.3199	31.2198	35.003	31.9853	24.1294	ctsc_0	49.2316	30.5844
ctsc	1234.28	1106.08	518.948	799.632	1121.34	675.019	1261.23	493.538	1655.51	1299.13	1688.48	1077.56	-0.302169	0.381736	0.428614	0.545007	chr15	43632616	43632954	chr15:43632616-43632954	339	*	Distal Intergenic	Distal Intergenic	15	43604031	43625549	21519	2	368704	NM_214722	-7067	ENSDARG00000101334	cathepsin C	1.37641	9.75491	17.7912	7.10641	16.6633	7.31492	10.8356	1.70069	1.24879	13.4627	5.74095	14.4776	ctsc_-7067	9.06793	8.73251
ctsc	1234.28	1106.08	518.948	799.632	1121.34	675.019	1261.23	493.538	1655.51	1299.13	1688.48	1077.56	-0.302169	0.381736	0.428614	0.545007	chr15	43637333	43637702	chr15:43637333-43637702	370	*	Distal Intergenic	Distal Intergenic	15	43604031	43625549	21519	2	368704	NM_214722	-11784	ENSDARG00000101334	cathepsin C	26.1518	16.2582	55.7457	23.3496	14.1638	7.31492	17.0274	22.1089	1.24879	5.38507	6.56108	1.60862	ctsc_-11784	22.7651	3.70089
ctsc	1234.28	1106.08	518.948	799.632	1121.34	675.019	1261.23	493.538	1655.51	1299.13	1688.48	1077.56	-0.302169	0.381736	0.428614	0.545007	chr15	43640893	43641043	chr15:43640893-43641043	151	*	Distal Intergenic	Distal Intergenic	15	43604031	43625549	21519	2	368704	NM_214722	-15344	ENSDARG00000101334	cathepsin C	12.3877	7.58715	16.6051	1.0152	0.833164	1.46298	4.64384	3.40138	1.24879	2.39337	0.820135	9.65175	ctsc_-15344	5.99207	3.52851
ctsc	1234.28	1106.08	518.948	799.632	1121.34	675.019	1261.23	493.538	1655.51	1299.13	1688.48	1077.56	-0.302169	0.381736	0.428614	0.545007	chr15	43641112	43641652	chr15:43641112-43641652	541	*	Distal Intergenic	Distal Intergenic	15	43604031	43625549	21519	2	368704	NM_214722	-15563	ENSDARG00000101334	cathepsin C	28.9047	34.6841	39.1406	7.10641	13.3306	23.4078	6.19179	22.1089	6.24397	13.7619	7.38122	16.0862	ctsc_-15563	21.8594	10.8683
cxcr4b	1957.28	225.158	249.864	290.156	1346.14	8372.63	10207.5	10757.1	14417	13303.5	18609.9	7248.76	-3.95403	0.57009	4.03956e-12	4.97542e-11	chr9	10426858	10427052	chr9:10426858-10427052	195	*	Distal Intergenic	Distal Intergenic	9	10692955	10694930	1976	1	114447	NM_131834	-265903	ENSDARG00000041959	chemokine (C-X-C motif), receptor 4b	4.12924	20.5937	13.0469	4.0608	0.833164	4.38895	3.0959	1.70069	8.74155	5.98341	8.20135	3.21725	cxcr4b_-265903	6.48116	6.53589
cxcr4b	1957.28	225.158	249.864	290.156	1346.14	8372.63	10207.5	10757.1	14417	13303.5	18609.9	7248.76	-3.95403	0.57009	4.03956e-12	4.97542e-11	chr9	10434714	10434989	chr9:10434714-10434989	276	*	Distal Intergenic	Distal Intergenic	9	10692955	10694930	1976	1	114447	NM_131834	-257966	ENSDARG00000041959	chemokine (C-X-C motif), receptor 4b	12.3877	13.0065	3.55824	7.10641	10.8311	11.7039	6.19179	11.9048	6.24397	13.4627	7.38122	20.9121	cxcr4b_-257966	9.58631	12
cxcr4b	1957.28	225.158	249.864	290.156	1346.14	8372.63	10207.5	10757.1	14417	13303.5	18609.9	7248.76	-3.95403	0.57009	4.03956e-12	4.97542e-11	chr9	10435186	10435421	chr9:10435186-10435421	236	*	Distal Intergenic	Distal Intergenic	9	10692955	10694930	1976	1	114447	NM_131834	-257534	ENSDARG00000041959	chemokine (C-X-C motif), receptor 4b	4.12924	10.8388	1.18608	2.0304	4.16582	2.92597	1.54795	5.10206	11.2391	8.97512	1.64027	1.60862	cxcr4b_-257534	3.99079	5.86579
cxcr4b	1957.28	225.158	249.864	290.156	1346.14	8372.63	10207.5	10757.1	14417	13303.5	18609.9	7248.76	-3.95403	0.57009	4.03956e-12	4.97542e-11	chr9	10438231	10438519	chr9:10438231-10438519	289	*	Distal Intergenic	Distal Intergenic	9	10692955	10694930	1976	1	114447	NM_131834	-254436	ENSDARG00000041959	chemokine (C-X-C motif), receptor 4b	6.88206	16.2582	3.55824	6.0912	10.8311	7.31492	7.73974	11.9048	12.4879	13.1635	8.20135	28.9552	cxcr4b_-254436	8.82254	15.702
cxcr4b	1957.28	225.158	249.864	290.156	1346.14	8372.63	10207.5	10757.1	14417	13303.5	18609.9	7248.76	-3.95403	0.57009	4.03956e-12	4.97542e-11	chr9	10448539	10448755	chr9:10448539-10448755	217	*	Distal Intergenic	Distal Intergenic	9	10692955	10694930	1976	1	114447	NM_131834	-244200	ENSDARG00000041959	chemokine (C-X-C motif), receptor 4b	15.1405	8.67103	4.74432	3.0456	2.49949	2.92597	4.64384	3.40138	1.24879	6.28258	2.46041	4.82587	cxcr4b_-244200	5.63402	3.70441
cxcr4b	1957.28	225.158	249.864	290.156	1346.14	8372.63	10207.5	10757.1	14417	13303.5	18609.9	7248.76	-3.95403	0.57009	4.03956e-12	4.97542e-11	chr9	10452000	10452137	chr9:10452000-10452137	138	*	Distal Intergenic	Distal Intergenic	9	10692955	10694930	1976	1	114447	NM_131834	-240818	ENSDARG00000041959	chemokine (C-X-C motif), receptor 4b	9.63489	5.41939	11.8608	1.0152	6.66531	1.46298	3.0959	1.70069	3.74638	2.69254	0.820135	1.60862	cxcr4b_-240818	5.10689	2.21692
cxcr4b	1957.28	225.158	249.864	290.156	1346.14	8372.63	10207.5	10757.1	14417	13303.5	18609.9	7248.76	-3.95403	0.57009	4.03956e-12	4.97542e-11	chr9	10459183	10459644	chr9:10459183-10459644	462	*	Distal Intergenic	Distal Intergenic	9	10692955	10694930	1976	1	114447	NM_131834	-233311	ENSDARG00000041959	chemokine (C-X-C motif), receptor 4b	17.8934	50.9423	13.0469	17.2584	9.1648	13.1669	10.8356	47.6193	8.74155	14.061	28.7047	20.9121	cxcr4b_-233311	22.4909	18.1049
cxcr4b	1957.28	225.158	249.864	290.156	1346.14	8372.63	10207.5	10757.1	14417	13303.5	18609.9	7248.76	-3.95403	0.57009	4.03956e-12	4.97542e-11	chr9	10463592	10464069	chr9:10463592-10464069	478	*	Distal Intergenic	Distal Intergenic	9	10692955	10694930	1976	1	114447	NM_131834	-228886	ENSDARG00000041959	chemokine (C-X-C motif), receptor 4b	2.75282	17.3421	3.55824	14.2128	15.8301	13.1669	1.54795	20.4083	3.74638	16.4544	5.74095	12.869	cxcr4b_-228886	11.1024	9.70268
cxcr4b	1957.28	225.158	249.864	290.156	1346.14	8372.63	10207.5	10757.1	14417	13303.5	18609.9	7248.76	-3.95403	0.57009	4.03956e-12	4.97542e-11	chr9	10464370	10464488	chr9:10464370-10464488	119	*	Distal Intergenic	Distal Intergenic	9	10692955	10694930	1976	1	114447	NM_131834	-228467	ENSDARG00000041959	chemokine (C-X-C motif), receptor 4b	16.5169	24.9292	3.55824	4.0608	0.833164	4.38895	3.0959	5.10206	33.7174	9.27429	31.1651	78.8226	cxcr4b_-228467	7.81066	38.2449
cxcr4b	1957.28	225.158	249.864	290.156	1346.14	8372.63	10207.5	10757.1	14417	13303.5	18609.9	7248.76	-3.95403	0.57009	4.03956e-12	4.97542e-11	chr9	10468596	10468941	chr9:10468596-10468941	346	*	Distal Intergenic	Distal Intergenic	9	10692955	10694930	1976	1	114447	NM_131834	-224014	ENSDARG00000041959	chemokine (C-X-C motif), receptor 4b	1.37641	28.1808	10.6747	7.10641	7.49848	10.2409	4.64384	18.7076	23.7271	9.87263	14.7624	8.04312	cxcr4b_-224014	11.0536	14.1013
cxcr4b	1957.28	225.158	249.864	290.156	1346.14	8372.63	10207.5	10757.1	14417	13303.5	18609.9	7248.76	-3.95403	0.57009	4.03956e-12	4.97542e-11	chr9	10478514	10478835	chr9:10478514-10478835	322	*	Distal Intergenic	Distal Intergenic	9	10692955	10694930	1976	1	114447	NM_131834	-214120	ENSDARG00000041959	chemokine (C-X-C motif), receptor 4b	4.12924	10.8388	7.11648	11.1672	10.8311	5.85194	7.73974	28.9117	8.74155	9.87263	5.74095	11.2604	cxcr4b_-214120	10.8233	8.90388
cxcr4b	1957.28	225.158	249.864	290.156	1346.14	8372.63	10207.5	10757.1	14417	13303.5	18609.9	7248.76	-3.95403	0.57009	4.03956e-12	4.97542e-11	chr9	10488489	10488771	chr9:10488489-10488771	283	*	Distal Intergenic	Distal Intergenic	9	10692955	10694930	1976	1	114447	NM_131834	-204184	ENSDARG00000041959	chemokine (C-X-C motif), receptor 4b	8.25847	5.41939	1.18608	7.10641	7.49848	2.92597	3.0959	5.10206	6.24397	9.27429	5.74095	16.0862	cxcr4b_-204184	5.07409	9.33636
cxcr4b	1957.28	225.158	249.864	290.156	1346.14	8372.63	10207.5	10757.1	14417	13303.5	18609.9	7248.76	-3.95403	0.57009	4.03956e-12	4.97542e-11	chr9	10492464	10492832	chr9:10492464-10492832	369	*	Distal Intergenic	Distal Intergenic	9	10692955	10694930	1976	1	114447	NM_131834	-200123	ENSDARG00000041959	chemokine (C-X-C motif), receptor 4b	9.63489	31.4325	13.0469	37.5624	38.3255	10.2409	17.0274	11.9048	13.7367	11.3685	5.74095	19.3035	cxcr4b_-200123	21.1469	12.5374
cxcr4b	1957.28	225.158	249.864	290.156	1346.14	8372.63	10207.5	10757.1	14417	13303.5	18609.9	7248.76	-3.95403	0.57009	4.03956e-12	4.97542e-11	chr9	10502618	10502937	chr9:10502618-10502937	320	*	Distal Intergenic	Distal Intergenic	9	10692955	10694930	1976	1	114447	NM_131834	-190018	ENSDARG00000041959	chemokine (C-X-C motif), receptor 4b	13.7641	8.67103	7.11648	1.0152	6.66531	7.31492	4.64384	5.10206	7.49276	11.6677	6.56108	8.04312	cxcr4b_-190018	6.78662	8.44115
cxcr4b	1957.28	225.158	249.864	290.156	1346.14	8372.63	10207.5	10757.1	14417	13303.5	18609.9	7248.76	-3.95403	0.57009	4.03956e-12	4.97542e-11	chr9	10518241	10518409	chr9:10518241-10518409	169	*	Distal Intergenic	Distal Intergenic	9	10692955	10694930	1976	1	114447	NM_131834	-174546	ENSDARG00000041959	chemokine (C-X-C motif), receptor 4b	2.75282	3.25164	1.18608	10.152	8.33164	1.46298	1.54795	1.70069	3.74638	5.98341	3.28054	3.21725	cxcr4b_-174546	3.79823	4.0569
cxcr4b	1957.28	225.158	249.864	290.156	1346.14	8372.63	10207.5	10757.1	14417	13303.5	18609.9	7248.76	-3.95403	0.57009	4.03956e-12	4.97542e-11	chr9	10519626	10519858	chr9:10519626-10519858	233	*	Distal Intergenic	Distal Intergenic	9	10692955	10694930	1976	1	114447	NM_131834	-173097	ENSDARG00000041959	chemokine (C-X-C motif), receptor 4b	1.37641	4.33551	4.74432	9.13681	15.8301	1.46298	3.0959	1.70069	4.99517	9.87263	5.74095	12.869	cxcr4b_-173097	5.21034	8.36944
cxcr4b	1957.28	225.158	249.864	290.156	1346.14	8372.63	10207.5	10757.1	14417	13303.5	18609.9	7248.76	-3.95403	0.57009	4.03956e-12	4.97542e-11	chr9	10522157	10522790	chr9:10522157-10522790	634	*	Distal Intergenic	Distal Intergenic	9	10692955	10694930	1976	1	114447	NM_131834	-170165	ENSDARG00000041959	chemokine (C-X-C motif), receptor 4b	9.63489	15.1743	24.9077	7.10641	25.8281	20.4818	4.64384	32.3131	18.7319	20.3436	15.5826	40.2156	cxcr4b_-170165	17.5113	23.7184
cxcr4b	1957.28	225.158	249.864	290.156	1346.14	8372.63	10207.5	10757.1	14417	13303.5	18609.9	7248.76	-3.95403	0.57009	4.03956e-12	4.97542e-11	chr9	10530656	10531171	chr9:10530656-10531171	516	*	Distal Intergenic	Distal Intergenic	9	10692955	10694930	1976	1	114447	NM_131834	-161784	ENSDARG00000041959	chemokine (C-X-C motif), receptor 4b	11.0113	20.5937	21.3494	7.10641	14.1638	10.2409	9.28769	13.6055	13.7367	20.3436	11.4819	19.3035	cxcr4b_-161784	13.4198	16.2164
cxcr4b	1957.28	225.158	249.864	290.156	1346.14	8372.63	10207.5	10757.1	14417	13303.5	18609.9	7248.76	-3.95403	0.57009	4.03956e-12	4.97542e-11	chr9	10531582	10531728	chr9:10531582-10531728	147	*	Distal Intergenic	Distal Intergenic	9	10692955	10694930	1976	1	114447	NM_131834	-161227	ENSDARG00000041959	chemokine (C-X-C motif), receptor 4b	1.37641	1.08388	4.74432	6.0912	4.16582	1.46298	1.54795	1.70069	11.2391	3.88922	9.84162	11.2604	cxcr4b_-161227	2.77166	9.05759
cxcr4b	1957.28	225.158	249.864	290.156	1346.14	8372.63	10207.5	10757.1	14417	13303.5	18609.9	7248.76	-3.95403	0.57009	4.03956e-12	4.97542e-11	chr9	10532352	10532667	chr9:10532352-10532667	316	*	Distal Intergenic	Distal Intergenic	9	10692955	10694930	1976	1	114447	NM_131834	-160288	ENSDARG00000041959	chemokine (C-X-C motif), receptor 4b	15.1405	15.1743	10.6747	34.5168	11.6643	10.2409	1.54795	20.4083	13.7367	14.061	5.74095	4.82587	cxcr4b_-160288	14.921	9.59114
cxcr4b	1957.28	225.158	249.864	290.156	1346.14	8372.63	10207.5	10757.1	14417	13303.5	18609.9	7248.76	-3.95403	0.57009	4.03956e-12	4.97542e-11	chr9	10537837	10537981	chr9:10537837-10537981	145	*	Distal Intergenic	Distal Intergenic	9	10692955	10694930	1976	1	114447	NM_131834	-154974	ENSDARG00000041959	chemokine (C-X-C motif), receptor 4b	1.37641	9.75491	1.18608	1.0152	4.16582	1.46298	4.64384	1.70069	1.24879	5.98341	0.820135	1.60862	cxcr4b_-154974	3.16324	2.41524
cxcr4b	1957.28	225.158	249.864	290.156	1346.14	8372.63	10207.5	10757.1	14417	13303.5	18609.9	7248.76	-3.95403	0.57009	4.03956e-12	4.97542e-11	chr9	10552365	10552493	chr9:10552365-10552493	129	*	Distal Intergenic	Distal Intergenic	9	10692955	10694930	1976	1	114447	NM_131834	-140462	ENSDARG00000041959	chemokine (C-X-C motif), receptor 4b	5.50565	7.58715	8.30256	1.0152	2.49949	2.92597	12.3836	15.3062	12.4879	4.18839	9.02149	8.04312	cxcr4b_-140462	6.94072	8.43523
cxcr4b	1957.28	225.158	249.864	290.156	1346.14	8372.63	10207.5	10757.1	14417	13303.5	18609.9	7248.76	-3.95403	0.57009	4.03956e-12	4.97542e-11	chr9	10557016	10557134	chr9:10557016-10557134	119	*	Distal Intergenic	Distal Intergenic	9	10692955	10694930	1976	1	114447	NM_131834	-135821	ENSDARG00000041959	chemokine (C-X-C motif), receptor 4b	31.6575	3.25164	1.18608	3.0456	1.66633	7.31492	1.54795	1.70069	33.7174	5.38507	6.56108	12.869	cxcr4b_-135821	6.42134	14.6331
cxcr4b	1957.28	225.158	249.864	290.156	1346.14	8372.63	10207.5	10757.1	14417	13303.5	18609.9	7248.76	-3.95403	0.57009	4.03956e-12	4.97542e-11	chr9	10559224	10559381	chr9:10559224-10559381	158	*	Distal Intergenic	Distal Intergenic	9	10692955	10694930	1976	1	114447	NM_131834	-133574	ENSDARG00000041959	chemokine (C-X-C motif), receptor 4b	2.75282	6.50327	3.55824	8.12161	7.49848	1.46298	1.54795	3.40138	1.24879	5.38507	4.92081	1.60862	cxcr4b_-133574	4.35584	3.29083
cxcr4b	1957.28	225.158	249.864	290.156	1346.14	8372.63	10207.5	10757.1	14417	13303.5	18609.9	7248.76	-3.95403	0.57009	4.03956e-12	4.97542e-11	chr9	10574548	10574916	chr9:10574548-10574916	369	*	Distal Intergenic	Distal Intergenic	9	10692955	10694930	1976	1	114447	NM_131834	-118039	ENSDARG00000041959	chemokine (C-X-C motif), receptor 4b	5.50565	24.9292	9.48864	3.0456	2.49949	7.31492	34.0549	17.0069	4.99517	12.266	5.74095	1.60862	cxcr4b_-118039	12.9807	6.15269
cxcr4b	1957.28	225.158	249.864	290.156	1346.14	8372.63	10207.5	10757.1	14417	13303.5	18609.9	7248.76	-3.95403	0.57009	4.03956e-12	4.97542e-11	chr9	10575881	10576010	chr9:10575881-10576010	130	*	Distal Intergenic	Distal Intergenic	9	10692955	10694930	1976	1	114447	NM_131834	-116945	ENSDARG00000041959	chemokine (C-X-C motif), receptor 4b	37.1631	35.768	36.7685	29.4408	34.1597	21.9448	35.6028	35.7144	71.1812	46.3715	56.5893	82.0399	cxcr4b_-116945	33.3203	64.0455
cxcr4b	1957.28	225.158	249.864	290.156	1346.14	8372.63	10207.5	10757.1	14417	13303.5	18609.9	7248.76	-3.95403	0.57009	4.03956e-12	4.97542e-11	chr9	10576276	10576395	chr9:10576276-10576395	120	*	Distal Intergenic	Distal Intergenic	9	10692955	10694930	1976	1	114447	NM_131834	-116560	ENSDARG00000041959	chemokine (C-X-C motif), receptor 4b	1.37641	7.58715	13.0469	3.0456	4.16582	1.46298	4.64384	8.50344	8.74155	6.88093	9.02149	4.82587	cxcr4b_-116560	5.47902	7.36746
cxcr4b	1957.28	225.158	249.864	290.156	1346.14	8372.63	10207.5	10757.1	14417	13303.5	18609.9	7248.76	-3.95403	0.57009	4.03956e-12	4.97542e-11	chr9	10588390	10588768	chr9:10588390-10588768	379	*	Distal Intergenic	Distal Intergenic	9	10692955	10694930	1976	1	114447	NM_131834	-104187	ENSDARG00000041959	chemokine (C-X-C motif), receptor 4b	19.2698	16.2582	8.30256	3.0456	14.1638	4.38895	1.54795	8.50344	46.2053	16.4544	27.0645	20.9121	cxcr4b_-104187	9.43503	27.6591
cxcr4b	1957.28	225.158	249.864	290.156	1346.14	8372.63	10207.5	10757.1	14417	13303.5	18609.9	7248.76	-3.95403	0.57009	4.03956e-12	4.97542e-11	chr9	10593376	10593867	chr9:10593376-10593867	492	*	Distal Intergenic	Distal Intergenic	9	10692955	10694930	1976	1	114447	NM_131834	-99088	ENSDARG00000041959	chemokine (C-X-C motif), receptor 4b	4.12924	15.1743	2.37216	11.1672	5.83215	5.85194	7.73974	10.2041	12.4879	16.1552	4.10068	12.869	cxcr4b_-99088	7.80886	11.4032
cxcr4b	1957.28	225.158	249.864	290.156	1346.14	8372.63	10207.5	10757.1	14417	13303.5	18609.9	7248.76	-3.95403	0.57009	4.03956e-12	4.97542e-11	chr9	10600552	10600737	chr9:10600552-10600737	186	*	Distal Intergenic	Distal Intergenic	9	10692955	10694930	1976	1	114447	NM_131834	-92218	ENSDARG00000041959	chemokine (C-X-C motif), receptor 4b	4.12924	9.75491	5.9304	7.10641	6.66531	11.7039	7.73974	1.70069	8.74155	5.38507	13.1222	9.65175	cxcr4b_-92218	6.84132	9.22513
cxcr4b	1957.28	225.158	249.864	290.156	1346.14	8372.63	10207.5	10757.1	14417	13303.5	18609.9	7248.76	-3.95403	0.57009	4.03956e-12	4.97542e-11	chr9	10604138	10604725	chr9:10604138-10604725	588	*	Distal Intergenic	Distal Intergenic	9	10692955	10694930	1976	1	114447	NM_131834	-88230	ENSDARG00000041959	chemokine (C-X-C motif), receptor 4b	8.25847	15.1743	8.30256	12.1824	19.1628	5.85194	6.19179	10.2041	26.2247	24.8312	19.6832	24.1294	cxcr4b_-88230	10.666	23.7171
cxcr4b	1957.28	225.158	249.864	290.156	1346.14	8372.63	10207.5	10757.1	14417	13303.5	18609.9	7248.76	-3.95403	0.57009	4.03956e-12	4.97542e-11	chr9	10617259	10617437	chr9:10617259-10617437	179	*	Distal Intergenic	Distal Intergenic	9	10692955	10694930	1976	1	114447	NM_131834	-75518	ENSDARG00000041959	chemokine (C-X-C motif), receptor 4b	1.37641	4.33551	1.18608	8.12161	1.66633	1.46298	1.54795	13.6055	8.74155	5.38507	9.84162	1.60862	cxcr4b_-75518	4.1628	6.39422
cxcr4b	1957.28	225.158	249.864	290.156	1346.14	8372.63	10207.5	10757.1	14417	13303.5	18609.9	7248.76	-3.95403	0.57009	4.03956e-12	4.97542e-11	chr9	10622407	10622564	chr9:10622407-10622564	158	*	Distal Intergenic	Distal Intergenic	9	10692955	10694930	1976	1	114447	NM_131834	-70391	ENSDARG00000041959	chemokine (C-X-C motif), receptor 4b	8.25847	10.8388	5.9304	9.13681	8.33164	16.0928	6.19179	5.10206	8.74155	3.59005	0.820135	1.60862	cxcr4b_-70391	8.73535	3.69009
cxcr4b	1957.28	225.158	249.864	290.156	1346.14	8372.63	10207.5	10757.1	14417	13303.5	18609.9	7248.76	-3.95403	0.57009	4.03956e-12	4.97542e-11	chr9	10627478	10627675	chr9:10627478-10627675	198	*	Distal Intergenic	Distal Intergenic	9	10692955	10694930	1976	1	114447	NM_131834	-65280	ENSDARG00000041959	chemokine (C-X-C motif), receptor 4b	2.75282	6.50327	3.55824	8.12161	2.49949	7.31492	1.54795	18.7076	6.24397	5.38507	2.46041	6.4345	cxcr4b_-65280	6.37573	5.13099
cxcr4b	1957.28	225.158	249.864	290.156	1346.14	8372.63	10207.5	10757.1	14417	13303.5	18609.9	7248.76	-3.95403	0.57009	4.03956e-12	4.97542e-11	chr9	10633368	10633676	chr9:10633368-10633676	309	*	Distal Intergenic	Distal Intergenic	9	10692955	10694930	1976	1	114447	NM_131834	-59279	ENSDARG00000041959	chemokine (C-X-C motif), receptor 4b	5.50565	41.1874	14.233	31.4712	14.997	14.6298	4.64384	5.10206	17.4831	7.77844	10.6618	4.82587	cxcr4b_-59279	16.4712	10.1873
cxcr4b	1957.28	225.158	249.864	290.156	1346.14	8372.63	10207.5	10757.1	14417	13303.5	18609.9	7248.76	-3.95403	0.57009	4.03956e-12	4.97542e-11	chr9	10638538	10638658	chr9:10638538-10638658	121	*	Distal Intergenic	Distal Intergenic	9	10692955	10694930	1976	1	114447	NM_131834	-54297	ENSDARG00000041959	chemokine (C-X-C motif), receptor 4b	6.88206	18.4259	8.30256	20.304	12.4975	24.8707	35.6028	18.7076	38.7126	16.4544	27.0645	46.6501	cxcr4b_-54297	18.1991	32.2204
cxcr4b	1957.28	225.158	249.864	290.156	1346.14	8372.63	10207.5	10757.1	14417	13303.5	18609.9	7248.76	-3.95403	0.57009	4.03956e-12	4.97542e-11	chr9	10639375	10639576	chr9:10639375-10639576	202	*	Distal Intergenic	Distal Intergenic	9	10692955	10694930	1976	1	114447	NM_131834	-53379	ENSDARG00000041959	chemokine (C-X-C motif), receptor 4b	2.75282	8.67103	1.18608	5.076	8.33164	7.31492	3.0959	25.5103	4.99517	6.58176	5.74095	1.60862	cxcr4b_-53379	7.74234	4.73162
cxcr4b	1957.28	225.158	249.864	290.156	1346.14	8372.63	10207.5	10757.1	14417	13303.5	18609.9	7248.76	-3.95403	0.57009	4.03956e-12	4.97542e-11	chr9	10649944	10650115	chr9:10649944-10650115	172	*	Distal Intergenic	Distal Intergenic	9	10692955	10694930	1976	1	114447	NM_131834	-42840	ENSDARG00000041959	chemokine (C-X-C motif), receptor 4b	12.3877	14.0904	4.74432	4.0608	2.49949	4.38895	1.54795	11.9048	6.24397	6.88093	4.10068	1.60862	cxcr4b_-42840	6.95306	4.70855
cxcr4b	1957.28	225.158	249.864	290.156	1346.14	8372.63	10207.5	10757.1	14417	13303.5	18609.9	7248.76	-3.95403	0.57009	4.03956e-12	4.97542e-11	chr9	10650586	10651038	chr9:10650586-10651038	453	*	Distal Intergenic	Distal Intergenic	9	10692955	10694930	1976	1	114447	NM_131834	-41917	ENSDARG00000041959	chemokine (C-X-C motif), receptor 4b	23.399	81.2909	79.4673	174.615	159.968	106.798	20.1233	74.8303	13.7367	11.9668	8.20135	20.9121	cxcr4b_-41917	90.0613	13.7043
cxcr4b	1957.28	225.158	249.864	290.156	1346.14	8372.63	10207.5	10757.1	14417	13303.5	18609.9	7248.76	-3.95403	0.57009	4.03956e-12	4.97542e-11	chr9	10656068	10656407	chr9:10656068-10656407	340	*	Distal Intergenic	Distal Intergenic	9	10692955	10694930	1976	1	114447	NM_131834	-36548	ENSDARG00000041959	chemokine (C-X-C motif), receptor 4b	9.63489	5.41939	15.419	13.1976	22.4954	10.2409	1.54795	6.80275	2.49759	6.58176	5.74095	11.2604	cxcr4b_-36548	10.5947	6.52016
cxcr4b	1957.28	225.158	249.864	290.156	1346.14	8372.63	10207.5	10757.1	14417	13303.5	18609.9	7248.76	-3.95403	0.57009	4.03956e-12	4.97542e-11	chr9	10658483	10658606	chr9:10658483-10658606	124	*	Distal Intergenic	Distal Intergenic	9	10692955	10694930	1976	1	114447	NM_131834	-34349	ENSDARG00000041959	chemokine (C-X-C motif), receptor 4b	4.12924	6.50327	1.18608	13.1976	17.4964	8.77791	10.8356	11.9048	13.7367	9.87263	10.6618	17.6949	cxcr4b_-34349	9.25388	12.9915
cxcr4b	1957.28	225.158	249.864	290.156	1346.14	8372.63	10207.5	10757.1	14417	13303.5	18609.9	7248.76	-3.95403	0.57009	4.03956e-12	4.97542e-11	chr9	10662199	10662818	chr9:10662199-10662818	620	*	Distal Intergenic	Distal Intergenic	9	10692955	10694930	1976	1	114447	NM_131834	-30137	ENSDARG00000041959	chemokine (C-X-C motif), receptor 4b	46.798	14.0904	24.9077	18.2736	17.4964	30.7227	4.64384	10.2041	18.7319	8.07761	13.9423	14.4776	cxcr4b_-30137	20.8921	13.8074
cxcr4b	1957.28	225.158	249.864	290.156	1346.14	8372.63	10207.5	10757.1	14417	13303.5	18609.9	7248.76	-3.95403	0.57009	4.03956e-12	4.97542e-11	chr9	10667401	10667729	chr9:10667401-10667729	329	*	Distal Intergenic	Distal Intergenic	9	10692955	10694930	1976	1	114447	NM_131834	-25226	ENSDARG00000041959	chemokine (C-X-C motif), receptor 4b	4.12924	23.8453	13.0469	31.4712	19.1628	13.1669	6.19179	1.70069	11.2391	9.27429	9.84162	14.4776	cxcr4b_-25226	14.0893	11.2082
cxcr4b	1957.28	225.158	249.864	290.156	1346.14	8372.63	10207.5	10757.1	14417	13303.5	18609.9	7248.76	-3.95403	0.57009	4.03956e-12	4.97542e-11	chr9	10678030	10679037	chr9:10678030-10679037	1008	*	Distal Intergenic	Distal Intergenic	9	10692955	10694930	1976	1	114447	NM_131834	-13918	ENSDARG00000041959	chemokine (C-X-C motif), receptor 4b	86.714	115.975	198.075	232.481	204.958	103.872	60.37	59.5241	46.2053	27.8229	37.7262	20.9121	cxcr4b_-13918	132.746	33.1666
[truncated: 5,521 more rows]
[truncated: 25 more columns]

## Sheet: Column Descriptions
Column Name	Column Description
SYMBOL	Gene symbol
MA1	DESeq2 normalized read count for MA1	RNA-seq Data
MA2	DESeq2 normalized read count for MA2
MA3A	DESeq2 normalized read count for MA3A
MA3B	DESeq2 normalized read count for MA3B
MA3C	DESeq2 normalized read count for MA3C
MC_WT1	DESeq2 normalized read count for MC_WT1
[truncated: 68 more rows]
